# Supplementary material for: Targeting IL-17A Improves the Dysmotility of the Small Intestine and Alleviates the Injury of the Interstitial Cells of Cajal during Sepsis
Source: Oxid Med Cell Longev. 2019 Aug 18;2019:1475729. doi: 10.1155/2019/1475729 (PMC6721283; doi:10.1155/2019/1475729)
Supplement: Supplementary 1 — Supplementay Table: Different gene expression profile data between normal and septic mice. [file 1475729.f2.xls]

## Sheet: up_T_vs_C
# Fold Change cut-off: 1.0 # P-value cut-off: 1.0 # Condition pairs: T_vs_C # Column A: ProbeName it represents probe name. # Column B: P-value, P-value calculated from unpaired t-test. # Column C: FDR, FDR is calculated from Benjamini Hochberg FDR. # Column D: Fold change, the absolute ratio (no log scale) of normalized intensities between two conditions. # Column E: Regulation, it depicts which…
T_vs_C 1.0 fold up regulated genes
	P-value and FDR		Fold change and Regulation		Annotations								Group--Raw Intensity		Group--Normalized Intensity		Raw Intensity						Normalized Intensity
ProbeName	P-value	FDR	Fold Change	Regulation	GenbankAccession	GenomicCoordinates	GeneSymbol	Description	Go	RefSeqAccession	UniGeneID	EntrezGeneID	group-T(raw)	group-C(raw)	group-T(normalized)	group-C(normalized)	[T-1, T](raw)	[T-2, T](raw)	[T-3, T](raw)	[C-1, C](raw)	[C-2, C](raw)	[C-3, C](raw)	[T-1, T](normalized)	[T-2, T](normalized)	[T-3, T](normalized)	[C-1, C](normalized)	[C-2, C](normalized)	[C-3, C](normalized)
A_51_P128876	0.62716	0.725398	1.08287	up	NM_025378	chr7:148195650-148195591	Ifitm3	Mus musculus interferon induced transmembrane protein 3 (Ifitm3), mRNA [NM_025378]	GO:0008285|GO:0005886|GO:0009986|GO:0005783|GO:0035456|GO:0035455|GO:0032897|GO:0045177|GO:0005634|GO:0009615|GO:0005764|GO:0009607|GO:0051607|GO:0005737|GO:0060337|GO:0016020|GO:0046597|GO:0045087|GO:0016023|GO:0034341|GO:0016021|GO:0045071|GO:0002376|GO:0005768	NM_025378	Mm.141021	66141	9416.36	14808	13.5797	13.4648	10694.7	8989.67	8564.75	16665.6	14507.7	13250.8	13.1924	13.7755	13.7712	13.667	13.3811	13.3464
A_51_P207591	0.245216	0.381128	2.54051	up	NM_013473	chr14:34913661-34913720	Anxa8	Mus musculus annexin A8 (Anxa8), transcript variant 1, mRNA [NM_013473]	GO:0007599|GO:0005544|GO:0051015|GO:0005886|GO:0007596|GO:0043325|GO:0031902|GO:0005509|GO:0005547|GO:0005546|GO:0046872|GO:0005829	NM_013473	Mm.3267	11752	61.6042	35.3429	5.79317	4.44805	131.31	8.66158	44.8407	35.6167	18.0224	52.3895	6.92445	4.09642	6.35863	4.72362	3.51323	5.1073
A_52_P358860	0.912603	0.941969	1.04507	up	NM_008180	chr2:155390531-155389432	Gss	Mus musculus glutathione synthetase (Gss), transcript variant 1, mRNA [NM_008180]	GO:0042277|GO:0000287|GO:0016874|GO:0004363|GO:0005524|GO:0042803|GO:0046872|GO:0043295|GO:0000166|GO:0006750|GO:0016594|GO:0046686|GO:0070062	NM_008180	Mm.252316	14854	1529.07	1937.24	10.5174	10.4538	3358.2	518.023	711.004	1592.82	2265.06	1953.85	11.5499	9.76967	10.2327	10.2444	10.6106	10.5065
A_51_P119031	0.438936	0.566507	1.07123	up	NM_001081430	chr14:49810345-49810404	Naa30	Mus musculus N(alpha)-acetyltransferase 30, NatC catalytic subunit (Naa30), mRNA [NM_001081430]	GO:0031417|GO:0005737|GO:0016746|GO:0008080|GO:0004596|GO:0008152|GO:0005844|GO:0016740	NM_001081430	Mm.275688	70646	427.181	739.751	9.11678	9.0175	689.895	289.557	302.091	632.821	814.954	771.479	9.2997	8.9992	9.05143	8.87976	9.07687	9.09588
A_51_P234359	0.954453	0.970162	1.01945	up	NM_011328	chr7:148464297-148464238	Sct	Mus musculus secretin (Sct), transcript variant 2, mRNA [NM_011328]	GO:0097150|GO:0021542|GO:0043524|GO:0005179|GO:0008542|GO:0005576	NM_011328	Mm.4723	20287	3884.42	5915.76	12.0819	12.0541	6822.23	3193.19	1637.83	4025.86	8618.37	5103.06	12.5756	12.2534	11.4168	11.5895	12.6143	11.9586
A_51_P128987	0.0364583	0.125615	7.25739	up	NM_008012	chr6:34318338-34318397	Akr1b8	Mus musculus aldo-keto reductase family 1, member B8 (Akr1b8), mRNA [NM_008012]	GO:0044598|GO:0047718|GO:0004032|GO:0045550|GO:0016488|GO:0005737|GO:0044597|GO:0001758|GO:0016491|GO:0055114	NM_008012	Mm.5378	14187	13883.4	2174.73	13.3266	10.4672	33876.2	3424.21	4349.68	3551.95	1121.89	1850.35	14.8204	12.3655	12.794	11.4079	9.57192	10.4217
A_55_P1958431	0.446023	0.57248	1.24723	up		chr8:040291783-040291842							16.7312	22.9551	4.2652	3.94647	33.6888	6.40033	10.1046	22.7207	26.9478	19.1967	4.89673	3.67831	4.22055	4.07093	4.0922	3.67627
A_51_P210560	0.0332334	0.119549	1.55138	up	NM_177242	chr5:122773821-122773880	Pptc7	Mus musculus PTC7 protein phosphatase homolog (S. cerevisiae) (Pptc7), mRNA [NM_177242]	GO:0005739|GO:0008150|GO:0003674|GO:0016787|GO:0004721|GO:0003824|GO:0046872	NM_177242	Mm.489670	320717	4201.51	4278.47	12.2844	11.6508	6843.48	3308.02	2453.03	4366.24	4005.71	4463.46	12.5801	12.3094	11.9636	11.7226	11.477	11.7529
A_55_P2048493	0.000311018	0.0243591	5.83292	up	NR_027955	chr3:65331565-65331506	4931440P22Rik	Mus musculus RIKEN cDNA 4931440P22 gene (4931440P22Rik), long non-coding RNA [NR_027955]	GO:0008150|GO:0003674|GO:0005575	NR_027955	Mm.475465	71004	641.272	217.376	9.74554	7.20133	859.976	572.153	491.686	230.047	174.609	247.471	9.61198	9.90736	9.7173	7.41953	6.80046	7.38399
A_55_P1999419	0.642863	0.737472	1.1314	up	NM_027404	chr12:112947765-112947706	Bag5	Mus musculus BCL2-associated athanogene 5 (Bag5), mRNA [NM_027404]	GO:0090083|GO:0048471|GO:0016234|GO:0070997|GO:0051087|GO:0061084|GO:0051444|GO:0005634|GO:0031397|GO:0031625	NM_027404	Mm.44239	70369	331.467	500.173	8.61222	8.43412	620.407	232.134	141.859	524.95	462.548	513.022	9.14824	8.69802	7.9904	8.6071	8.21943	8.47582
A_51_P112237	0.203866	0.337238	1.10377	up	NM_144524	chr12:88041617-88041558	Angel1	Mus musculus angel homolog 1 (Drosophila) (Angel1), mRNA [NM_144524]	GO:0008150|GO:0003674|GO:0005575	NM_144524	Mm.63979	68737	46.5124	86.613	6.01407	5.87163	69.5271	37.7976	32.2124	81.9795	90.1008	87.7587	5.9778	6.18548	5.87891	5.91552	5.82689	5.87248
A_55_P2111483	0.198177	0.331036	1.80197	up	AK020790	chr16:37017569-37017628	Polq	polymerase (DNA directed), theta [Source:MGI Symbol;Acc:MGI:2155399] [ENSMUST00000182163]	GO:0043142|GO:0006260|GO:0006261|GO:0006281|GO:0006200|GO:0003887|GO:0016779|GO:0003677|GO:0016740		Mm.259114	77782	16.6657	17.3157	4.40341	3.55384	23.7863	20.0942	6.11676	19.4154	13.9358	18.596	4.38166	5.30793	3.52064	3.84881	3.18803	3.62469
A_55_P2005898	0.0106681	0.0679432	1.95002	up	XR_397181	chr16:91170513-91170454		predicted gene 9881 [Source:MGI Symbol;Acc:MGI:3641832] [ENSMUST00000068783]		XR_397181	Mm.483659		48.7092	53.6891	6.13662	5.17314	62.1698	43.3936	40.5642	57.0921	57.0764	46.8988	5.8157	6.38448	6.20969	5.39961	5.17408	4.94572
A_55_P1984173	0.0358081	0.124486	1.78945	up	NM_178080	chr3:97542865-97542806	Pde4dip	Mus musculus phosphodiesterase 4D interacting protein (myomegalin) (Pde4dip), transcript variant 2, mRNA [NM_178080]	GO:0005515|GO:0005813|GO:0005737|GO:0005794|GO:0005634|GO:0030016|GO:0019899|GO:0005856|GO:0043623	NM_178080	Mm.129840	83679	5967.66	4924.03	12.7089	11.8693	10726	3979.61	3197.4	5349.23	4752.91	4669.96	13.2021	12.5875	12.337	12.0274	11.7521	11.8286
A_52_P122696	0.163894	0.294016	1.22417	up	NM_019722	chr19:6137822-6137763	Arl2	Mus musculus ADP-ribosylation factor-like 2 (Arl2), mRNA [NM_019722]	GO:0015870|GO:0005515|GO:0031116|GO:0005813|GO:0005794|GO:0007264|GO:0031113|GO:0003924|GO:0005634|GO:0005525|GO:0005829|GO:0051297|GO:0006184|GO:0005622|GO:0005739|GO:0005758|GO:0007049|GO:0005737|GO:0000166|GO:0051457|GO:0019003|GO:0005856|GO:0034260	NM_019722	Mm.21071	56327	240.406	371.36	8.28459	7.99279	406.53	149.236	165.451	380.605	347.207	386.269	8.5529	8.09791	8.20296	8.13299	7.79368	8.05171
A_51_P153995	0.218416	0.352771	2.52519	up	NM_018762	chr6:87729650-87729709	Gp9	Mus musculus glycoprotein 9 (platelet) (Gp9), mRNA [NM_018762]	GO:0007599|GO:0008150|GO:0003674|GO:0016020|GO:0007596|GO:0016021|GO:0007155	NM_018762	Mm.12897	54368	33.8416	20.8014	4.99186	3.65548	79.5047	11.838	10.182	33.3948	5	24.0094	6.18082	4.56185	4.23293	4.63425	2.32205	4.01013
A_51_P134812	0.172473	0.303408	7.41656	up	NM_026929	chr2:119179990-119180049	Chac1	Mus musculus ChaC, cation transport regulator 1 (Chac1), mRNA [NM_026929]	GO:0005802|GO:0006986|GO:0045746|GO:0005794|GO:0005112|GO:0006915|GO:0005829|GO:0007399|GO:0005737|GO:0007219|GO:0070059|GO:0010955|GO:0022008	NM_026929	Mm.35083	69065	7660.31	461.972	11.0851	8.19435	21828.8	955.314	196.786	738.141	288.064	359.712	14.2025	10.5994	8.4535	9.1103	7.53451	7.93825
A_51_P365859	0.855392	0.901451	1.04712	up	NM_183173	chr11:53290743-53290684	Sowaha	Mus musculus sosondowah ankyrin repeat domain family member A (Sowaha), mRNA [NM_183173]	GO:0008150|GO:0003674|GO:0005575	NM_183173	Mm.145208	237761	577.031	1094.97	9.62025	9.55382	708.836	479.463	542.793	662.017	1295.31	1327.58	9.34054	9.66964	9.85056	8.9447	9.7847	9.93207
A_55_P2185910	0.972351	0.9818	1.0224	up	NM_172307	chrX:153988943-153988884	Mbtps2	Mus musculus membrane-bound transcription factor peptidase, site 2 (Mbtps2), mRNA [NM_172307]	GO:0005737	NM_172307	Mm.37577	270669	20.0594	21.9217	3.92172	3.88976	48.037	7.14125	5	25.5676	18.9482	21.2492	5.43162	3.82592	2.50761	4.24551	3.59518	3.82858
A_55_P1957997	0.0877249	0.205165	2.00308	up	XR_384809	chr16:31428129-31428070	LOC100047123	PREDICTED: Mus musculus uncharacterized LOC100047123 (LOC100047123), misc_RNA [XR_384809]		XR_384809	Mm.466711	100047123	37.9272	31.6421	5.40135	4.39914	79.8168	19.1368	14.828	27.5285	27.8842	39.5137	6.18504	5.23942	4.7796	4.3498	4.14035	4.70726
A_51_P107315	0.219298	0.353769	1.81326	up	NM_145423	chr10:88391888-88391947	Slc5a8	Mus musculus solute carrier family 5 (iodide transporter), member 8 (Slc5a8), mRNA [NM_145423]	GO:0005215|GO:0016020|GO:0005886|GO:0006810|GO:0006915|GO:0016021|GO:0006814|GO:0055085|GO:0070062|GO:0015293|GO:0006811	NM_145423	Mm.77381	216225	14.3028	16.0218	4.28766	3.42908	12.6374	21.7585	8.51258	15.522	16.6324	15.9109	3.45711	5.42562	3.98026	3.50771	3.39039	3.38913
A_51_P483658	0.0455337	0.141257	1.54167	up	NM_018880	chr7:112759281-112759222	Trim3	Mus musculus tripartite motif-containing 3 (Trim3), transcript variant 2, mRNA [NM_018880]	GO:0005622|GO:0005515|GO:0005737|GO:0006810|GO:0008270|GO:0015031|GO:0046872|GO:0005768	NM_018880	Mm.29290	55992	483.913	598.994	9.33319	8.70869	646.476	298.2	507.063	554.835	643.587	598.562	9.20699	9.03609	9.75648	8.68859	8.73268	8.70481
A_55_P2153580	0.838612	0.889091	1.08601	up	NM_001083958	chr5:145999132-145999191	Zfp655	Mus musculus zinc finger protein 655 (Zfp655), transcript variant 2, mRNA [NM_001083958]	GO:0006355|GO:0005737|GO:0003700|GO:0005730|GO:2000134|GO:0005634	NM_001083958	Mm.206555	72611	64.0908	92.6346	6.06377	5.94474	139.229	33.4591	19.5842	71.1767	112.489	94.2375	7.00837	6.01987	5.16306	5.7138	6.14663	5.97377
A_55_P2040878	0.229379	0.364437	1.70761	up	NM_001040691	chr5:114588731-114588790	Ung	Mus musculus uracil DNA glycosylase (Ung), transcript variant 1, mRNA [NM_001040691]	GO:0045437|GO:0004844|GO:0043066|GO:0005634|GO:0016446|GO:0006974|GO:0016799|GO:0005739|GO:0006281|GO:0016787|GO:0006284|GO:0016798|GO:0008152|GO:0016447	NM_001040691	Mm.1393	22256	4309.76	4774.83	12.4485	11.6765	4580.62	3495.84	4852.83	2352.65	4951.47	7020.38	12.0047	12.3916	12.9492	10.8034	11.8084	12.4178
A_55_P2003393	0.00207214	0.0369472	3.42085	up	XR_378363	chr7:106777584-106777643	LOC102637409	PREDICTED: Mus musculus uncharacterized LOC102637409 (LOC102637409), ncRNA [XR_378363]		XR_378363	Mm.427997	102637409	63.3688	39.7251	6.51711	4.74275	73.9784	65.2419	50.8862	36.6047	41.1418	41.4288	6.07503	6.93413	6.54218	4.76215	4.69076	4.77535
A_55_P1999992	0.67411	0.764136	1.1853	up	NM_172693	chr4:47135796-47135855	Galnt12	Mus musculus UDP-N-acetyl-alpha-D-galactosamine:polypeptide N-acetylgalactosaminyltransferase 12 (Galnt12), mRNA [NM_172693]	GO:0008150|GO:0003674|GO:0004653|GO:0005794|GO:0016020|GO:0016757|GO:0016021|GO:0005575|GO:0046872|GO:0016740	NM_172693	Mm.132246	230145	1445.12	1618.35	10.4445	10.1993	3154.26	707.298	473.797	1410.94	1862.12	1581.98	11.4726	10.1969	9.66414	10.0735	10.3275	10.1969
A_51_P114843	0.287189	0.422796	1.67339	up	NM_198622	chr6:87931096-87931037	H1fx	Mus musculus H1 histone family, member X (H1fx), mRNA [NM_198622]	GO:0005515|GO:0008150|GO:0005694|GO:0005730|GO:0005634|GO:0003677	NM_198622	Mm.33796	243529	16.3371	20.3868	4.52968	3.78691	11.9398	14.1801	22.8913	19.9526	22.7301	18.4778	3.37832	4.81676	5.39396	3.8953	3.84897	3.61646
A_55_P2138416	0.638712	0.734026	1.09598	up		chr4:069615168-069615109							2977.01	4202	11.7567	11.6245	5246.56	2135.96	1548.5	4538.42	4199.22	3868.37	12.2049	11.717	11.3482	11.784	11.5539	11.5356
A_51_P474422	0.298861	0.433522	1.2544	up	NM_025931	chr15:77989969-77989910	Ift27	Mus musculus intraflagellar transport 27 (Ift27), mRNA [NM_025931]	GO:0005622|GO:0005515|GO:0005929|GO:0005813|GO:0042073|GO:0000166|GO:0007264|GO:0097225|GO:0005623|GO:0030992|GO:0097228|GO:0005525	NM_025931	Mm.30191	67042	254.786	423.491	8.51038	8.18338	281.377	211.108	271.874	410.537	393.191	466.744	8.04353	8.57474	8.91287	8.23988	7.979	8.33127
A_55_P2378827	0.532259	0.647406	1.16144	up	AK047890	chr19:16318217-16318276	LOC553096	Mus musculus 16 days embryo head cDNA, RIKEN full-length enriched library, clone:C130020E14 product:unclassifiable, full insert sequence. [AK047890]			Mm.441684	553096	398.274	569.467	8.84692	8.631	778.078	223.671	193.071	550.554	594.737	563.112	9.46465	8.64928	8.42684	8.67543	8.60931	8.60827
A_51_P422369	0.107806	0.229722	1.1682	up	NM_001013022	chr15:89207983-89207924	Odf3b	Mus musculus outer dense fiber of sperm tails 3B (Odf3b), mRNA [NM_001013022]	GO:0008150|GO:0003674|GO:0005575	NM_001013022	Mm.247273	70113	1180.95	1826.11	10.6069	10.3827	1620.24	923.65	998.945	1794.51	1725.48	1958.33	10.5323	10.5522	10.7364	10.4178	10.2175	10.5127
A_52_P401311	0.796776	0.857815	1.06745	up		chr1:079919568-079919509							12758.9	17875.3	13.8243	13.7301	21721.4	5970.99	10584.4	15014.4	20263.8	18347.8	14.1923	13.1823	14.0983	13.5038	13.8821	13.8045
A_65_P03442	0.74948	0.82266	1.0474	up	NM_008828	chrX:103398640-103398699	Pgk1	Mus musculus phosphoglycerate kinase 1 (Pgk1), mRNA [NM_008828]	GO:0016310|GO:0004618|GO:0043531|GO:0005975|GO:0006094|GO:0005524|GO:0006096|GO:0070062|GO:0005829	NM_008828	Mm.336205	18655	15778.8	23658.5	14.1994	14.1326	25590.6	12828.2	8917.5	23746.3	25508.7	21720.5	14.4488	14.3216	13.8279	14.1368	14.2131	14.0481
A_55_P2347529	0.199562	0.33252	1.58477	up	XR_378198	chr6:148895581-148895640	3010003L21Rik	PREDICTED: Mus musculus RIKEN cDNA 3010003L21 gene (3010003L21Rik), misc_RNA [XR_378198]		XR_378198	Mm.440359	109163	106.044	123.207	7.04415	6.37988	176.411	99.5944	42.1263	134.684	104.6	130.337	7.34193	7.52976	6.26078	6.64434	6.04708	6.44824
A_52_P46085	0.405002	0.53448	1.11406	up	NM_080638	chr7:134133307-134133248	Mvp	Mus musculus major vault protein (Mvp), mRNA [NM_080638]	GO:0038127|GO:0048471|GO:0023057|GO:0019901|GO:0008283|GO:0019903|GO:0061099|GO:0005634|GO:0072376|GO:0031953|GO:0005737|GO:0030529|GO:0005856|GO:0070062	NM_080638	Mm.228797	78388	1008.67	1666.32	10.3918	10.236	1340.87	769.817	915.317	1347.92	2010	1641.04	10.2541	10.3091	10.6124	10.011	10.4434	10.2536
A_55_P2089677	0.7142	0.795964	1.09027	up	NM_194341	chr11:83854397-83854456	Synrg	Mus musculus synergin, gamma (Synrg), mRNA [NM_194341]	GO:0008150|GO:0003674|GO:0005737|GO:0005794|GO:0016020|GO:0005509|GO:0006810|GO:0030130|GO:0015031|GO:0006897	NM_194341	Mm.82680	217030	357.18	547.969	8.70002	8.57534	698.49	193.051	180	557.34	552.105	534.462	9.31854	8.45207	8.32945	8.69383	8.49668	8.53551
A_52_P413855	0.815359	0.8714	1.0583	up	NM_144902	chr3:116376192-116376133	Slc35a3	Mus musculus solute carrier family 35 (UDP-N-acetylglucosamine (UDP-GlcNAc) transporter), member 3 (Slc35a3), mRNA [NM_144902]	GO:0015780|GO:0005794|GO:0016020|GO:0005338|GO:0000139|GO:0006810|GO:0008643|GO:0005351|GO:0016021|GO:0015788	NM_144902	Mm.482174	229782	1646.94	2467.82	10.892	10.8102	2987.55	1140.74	812.513	2967.65	2200.33	2235.49	11.3978	10.8435	10.4346	11.1426	10.5677	10.7202
A_55_P2064965	0.8959	0.930482	1.09462	up	AK154763	chr7:72887049-72886990	Gm10624	Mus musculus NOD-derived CD11c +ve dendritic cells cDNA, RIKEN full-length enriched library, clone:F630106A15 product:hypothetical protein, full insert sequence. [AK154763]	GO:0008150|GO:0003674|GO:0005575		Mm.484502	100038420	319.112	310.945	7.81072	7.68029	824.205	71.4275	61.7028	421.228	214.664	296.944	9.55059	7.06967	6.81191	8.27588	7.10881	7.65618
A_55_P1976494	0.492386	0.612692	1.29788	up	NM_028377	chr12:85774671-85774730	Ccdc176	Mus musculus coiled-coil domain containing 176 (Ccdc176), mRNA [NM_028377]	GO:0008150|GO:0005929|GO:0003674|GO:0005737|GO:0042995|GO:0005575|GO:0005856	NM_028377	Mm.440428	72873	26.2678	32.9119	4.85125	4.47509	54.895	15.2602	8.64813	37.2139	29.8965	31.6252	5.63024	4.92168	4.00183	4.7848	4.23941	4.40106
A_55_P2052924	0.211371	0.34514	1.16368	up	NM_009156	chr7:16502621-16502562	Sepw1	Mus musculus selenoprotein W, muscle 1 (Sepw1), mRNA [NM_009156]	GO:0008430|GO:0005737|GO:0016209|GO:0005886|GO:0016491|GO:0045454|GO:0055114	NM_009156	Mm.42829	20364	4898.66	6986.39	12.5906	12.3719	6947.94	4029.34	3718.71	6810.6	6050.54	8098.05	12.6047	12.6022	12.565	12.3695	12.1193	12.627
A_51_P480588	0.22167	0.356362	2.85615	up	NM_001011535	chr2:88286192-88286176	Olfr1182	Mus musculus olfactory receptor 1182 (Olfr1182), mRNA [NM_001011535]	GO:0007608|GO:0007165|GO:0016020|GO:0007186|GO:0005886|GO:0004930|GO:0016021|GO:0004871|GO:0050896	NM_001011535	Mm.223246	258167	25.2462	17.6916	4.99107	3.477	8.73744	39.2002	27.8008	10.7902	29.5432	12.7414	3.06436	6.24397	5.66489	3.07953	4.22523	3.12623
A_55_P2131328	0.0958709	0.215364	1.97515	up		chr5:135113276-135113217							258.536	253.286	8.30266	7.3207	471.932	176.684	126.991	135.845	375.84	248.174	8.75487	8.32789	7.82522	6.65881	7.91531	7.38797
A_51_P351481	0.0912173	0.209454	1.65869	up	NM_019937	chr3:65751624-65750823	Ccnl1	Mus musculus cyclin L1 (Ccnl1), mRNA [NM_019937]	GO:0005515|GO:0006396|GO:0006355|GO:0005737|GO:0019901|GO:0016607|GO:0005634|GO:0000079|GO:0008023|GO:0006351	NM_019937	Mm.175612	56706	1273.05	1203.3	10.4873	9.75726	2426.13	774.61	618.415	1100.71	1371.06	1138.14	11.1147	10.3214	10.0258	9.70482	9.86741	9.69955
A_52_P409833	0.0140055	0.0768432	5.60811	up	NM_008872	chr8:23892531-23892590	Plat	Mus musculus plasminogen activator, tissue (Plat), mRNA [NM_008872]	GO:0001666|GO:0004252|GO:0009986|GO:0035249|GO:0045202|GO:0045177|GO:0014909|GO:0005576|GO:0003824|GO:0005615|GO:0045861|GO:0005737|GO:0016787|GO:0006508|GO:0031639|GO:0008236|GO:0008233|GO:0048008|GO:0030141|GO:0070062|GO:0060279	NM_008872	Mm.154660	18791	423.937	111.285	8.71959	6.23207	910.999	247.197	113.614	117.68	111.594	104.582	9.70309	8.78321	7.67246	6.43999	6.13438	6.12185
A_55_P2165974	0.30547	0.440184	1.25401	up		chr11:62180505-62180446	Ncor1	nuclear receptor co-repressor 1 [Source:MGI Symbol;Acc:MGI:1349717] [ENSMUST00000101068]	GO:0005515|GO:0000790|GO:0003700|GO:0044212|GO:0021794|GO:0046329|GO:0016580|GO:0017053|GO:0002361|GO:0042632|GO:0001102|GO:0035033|GO:0003714|GO:0019904|GO:0030331|GO:0014067|GO:0000122|GO:0032922|GO:0000118|GO:0001012|GO:0045892|GO:0008284|GO:0048471|GO:0042826|GO:0035257|GO:0005634|GO:0042974|GO:0042975|GO:0046966|GO:0046965|GO:0005737|GO:0060318|GO:0072362|GO:0040014|GO:0005876|GO:0072368|GO:…			20185	39.4593	61.9321	5.6816	5.35505	69.4999	25.5685	23.3095	64.4716	75.8699	45.4548	5.97681	5.64463	5.42336	5.57987	5.58402	4.90126
A_55_P2051778	0.410395	0.539418	1.14223	up	NM_017465	chr7:52985509-52985450	Sult2b1	Mus musculus sulfotransferase family, cytosolic, 2B, member 1 (Sult2b1), mRNA [NM_017465]	GO:0006629|GO:0050294|GO:0005737|GO:0005783|GO:0004027|GO:0008146|GO:0000103|GO:0016740|GO:0008202|GO:0043231	NM_017465	Mm.271634	54200	4053.18	6079.21	12.3585	12.1666	4817.23	3948.41	3393.89	4827.48	7021.2	6388.95	12.0715	12.5756	12.4283	11.8757	12.3283	12.2959
A_52_P302587	0.198943	0.331921	1.3631	up	NM_023543	chr6:54251148-54251207	Chn2	Mus musculus chimerin 2 (Chn2), transcript variant 1, mRNA [NM_023543]	GO:0043547|GO:0035556|GO:0005622|GO:0007165|GO:0016020|GO:0045202|GO:0046872|GO:0005096	NM_023543	Mm.321147	69993	203.808	274.933	7.99618	7.54928	358.064	155.771	97.5896	242.043	321.755	261.002	8.38025	8.16138	7.4469	7.49421	7.69023	7.46341
A_55_P1953439	0.00224587	0.0374929	1.73574	up	NM_001081193	chr10:120360606-120360547	Lemd3	Mus musculus LEM domain containing 3 (Lemd3), mRNA [NM_001081193]	GO:0005637|GO:0005634|GO:0032926|GO:0005635|GO:0035914|GO:0003677|GO:0005639|GO:0030514|GO:0000166|GO:0016020|GO:0051726|GO:0016021|GO:0030512	NM_001081193	Mm.339371	380664	1121.55	1131.9	10.4712	9.67562	1735.99	906.29	722.383	1106.28	1199.84	1089.59	10.6302	10.529	10.2543	9.71436	9.67373	9.63877
A_55_P1965989	0.135045	0.261969	1.2848	up	NM_026046	chr7:13390391-13390332	Zfp329	Mus musculus zinc finger protein 329 (Zfp329), mRNA [NM_026046]	GO:0008150|GO:0006355|GO:0005634|GO:0003676|GO:0003677|GO:0046872|GO:0006351	NM_026046	Mm.333574	67230	84.4873	132.29	6.84669	6.48515	131.545	69.173	52.7442	138.919	117.479	140.473	6.92794	7.01907	6.59306	6.68783	6.20726	6.56036
A_55_P2027152	0.00642477	0.0555412	4.8646	up	NM_198109	chr5:114392287-114392228	Ssh1	Mus musculus slingshot homolog 1 (Drosophila) (Ssh1), mRNA [NM_198109]	GO:0030036|GO:0005886|GO:0032268|GO:0003779|GO:0005634|GO:0003677|GO:0071318|GO:0010591|GO:0016791|GO:0000902|GO:0005737|GO:0006470|GO:0016787|GO:0008064|GO:0016311|GO:0004721|GO:0008138|GO:0005856|GO:0050770|GO:0004725	NM_198109	Mm.389682	231637	30.1464	10.719	5.23803	2.9557	55.5528	20.7164	14.17	16.6625	8.55403	6.94045	5.64628	5.35479	4.713	3.62627	2.71063	2.53021
A_55_P2049080	0.581724	0.689412	1.1688	up	NM_001242363	chr7:112527208-112527149	Fam160a2	Mus musculus family with sequence similarity 160, member A2 (Fam160a2), transcript variant 1, mRNA [NM_001242363]	GO:0003674|GO:0008333|GO:0006810|GO:0007032|GO:0045022|GO:0015031|GO:0007040|GO:0070695	NM_001242363	Mm.30254	74349	2028.24	2528.91	11.0876	10.8625	4056.7	1073.88	954.126	2350.35	2562.95	2673.44	11.8286	10.757	10.6772	10.801	10.8048	10.9819
A_55_P2110513	0.932573	0.955543	1.01363	up	NM_201529	chr14:102333150-102333209	Lmo7	Mus musculus LIM domain only 7 (Lmo7), mRNA [NM_201529]	GO:0016337|GO:0016324|GO:0005913|GO:0042805|GO:0008022|GO:0046872	NM_201529	Mm.218981	380928	502.489	867.705	9.27665	9.25712	891.36	308.377	307.731	721.252	1005.54	876.328	9.66574	9.08674	9.07746	9.07651	9.40212	9.29274
A_51_P401501	0.4548	0.579736	2.37527	up	NM_029921	chr6:38065689-38065748	Tmem213	Mus musculus transmembrane protein 213 (Tmem213), mRNA [NM_029921]	GO:0008150|GO:0003674|GO:0016020|GO:0016021|GO:0005575	NM_029921	Mm.387207	77522	127.776	29.4341	5.52567	4.27758	364.721	12.4083	6.19868	37.4094	20.3288	30.5642	8.40812	4.62984	3.53905	4.79206	3.69139	4.34929
A_55_P2155021	0.804021	0.863272	1.0992	up	NM_028358	chr6:40427995-40428054	Ssbp1	Mus musculus single-stranded DNA binding protein 1 (Ssbp1), transcript variant 2, mRNA [NM_028358]	GO:0042645|GO:0006260|GO:0005739|GO:0070584|GO:0003697|GO:0003682|GO:0051096|GO:0005634|GO:0003677|GO:0070062	NM_028358	Mm.276356	381760	69.9191	96.2244	6.16199	6.02554	156.608	28.2643	24.885	85.582	102.591	100.5	7.17873	5.78659	5.52066	5.98352	6.02659	6.0665
A_55_P2071406	0.125886	0.251076	1.55481	up	XM_006506979	chr6:141448762-141448821	Pde3a	PREDICTED: Mus musculus phosphodiesterase 3A, cGMP inhibited (Pde3a), transcript variant X1, mRNA [XM_006506979]	GO:0043066|GO:0008081|GO:0004115|GO:0004119|GO:0004114|GO:0042493|GO:0019934|GO:0001556|GO:0003824|GO:0046872|GO:0005829|GO:0040020|GO:0007165|GO:0030552|GO:0016020|GO:0016787|GO:0060282|GO:0019933|GO:0016021|GO:0043117|GO:0043116|GO:0071321|GO:0006198	XM_006506979	Mm.485878	54611	1167.56	1363.67	10.5217	9.88495	1867.17	804.896	830.609	817.64	1641.64	1631.72	10.726	10.37	10.4691	9.26229	10.1497	10.2429
A_51_P330630	0.00183944	0.035531	3.09557	up	NM_144937	chr9:66366090-66366031	Usp3	Mus musculus ubiquitin specific peptidase 3 (Usp3), mRNA [NM_144937]	GO:0016578|GO:0006511|GO:0000790|GO:0005634|GO:0046872|GO:0006974|GO:0042393|GO:0007049|GO:0031647|GO:0006281|GO:0016787|GO:0006508|GO:0008233|GO:0008270|GO:0004221|GO:0008234|GO:0000278|GO:0016568	NM_144937	Mm.38976	235441	1791.45	973.764	11.0687	9.43845	3089.61	1222.32	1062.43	809.746	1017.79	1093.75	11.4427	10.9436	10.8196	9.24832	9.42254	9.64448
A_55_P1996319	0.0213819	0.0946377	1.59076	up	NM_029687	chr2:38856996-38857055	Wdr38	Mus musculus WD repeat domain 38 (Wdr38), mRNA [NM_029687]	GO:0003674|GO:0002244|GO:0005575	NM_029687	Mm.477090	76646	46.8971	61.1667	6.03113	5.36141	69.3904	39.0513	32.2497	68.2481	58.0127	57.2394	5.9748	6.23798	5.88061	5.65633	5.19561	5.2323
A_55_P2029612	0.00098234	0.0306874	1.31	up	NM_001291144	chr2:158683831-158683890	Dhx35	Mus musculus DEAH (Asp-Glu-Ala-His) box polypeptide 35 (Dhx35), transcript variant 2, mRNA [NM_001291144]	GO:0008150|GO:0003674|GO:0016787|GO:0000166|GO:0071013|GO:0005524	NM_001291144	Mm.315652	71715	777.705	1083.87	9.99617	9.6066	1115.68	601.433	616.001	1009.87	1212.12	1029.62	9.99571	9.97337	10.0194	9.58026	9.69072	9.54882
A_51_P211822	0.0363592	0.125486	1.55308	up	NM_001013414	chr11:69727230-69727289	Neurl4	Mus musculus neuralized homolog 4 (Drosophila) (Neurl4), transcript variant 1, mRNA [NM_001013414]	GO:0008150|GO:0003674|GO:0005737|GO:0005575|GO:0005856	NM_001013414	Mm.268347	216860	613.038	761.315	9.69265	9.05752	764.039	475.847	599.23	845.349	776.096	662.501	9.43932	9.65647	9.98215	9.30696	9.00304	8.86255
A_55_P2177539	0.162102	0.292367	1.2593	up	NM_011434	chr16:90226509-90226568	Sod1	Mus musculus superoxide dismutase 1, soluble (Sod1), mRNA [NM_011434]	GO:0045859|GO:0005515|GO:0042542|GO:0030346|GO:0060047|GO:0008090|GO:0009408|GO:0007605|GO:0006801|GO:0060088|GO:0006749|GO:0007283|GO:0001819|GO:0019226|GO:0048678|GO:0005615|GO:0060087|GO:0042802|GO:0006879|GO:0005622|GO:0043524|GO:0032314|GO:0001895|GO:0019430|GO:0043025|GO:0031667|GO:0002262|GO:0006979|GO:0070062|GO:0004784|GO:0016209|GO:0007566|GO:0005507|GO:0007569|GO:0007568|GO:0043085|GO:…	NM_011434	Mm.276325	20655	36949.6	47885.6	15.4558	15.1232	60869.7	29147.5	20831.6	43078.9	51911.1	48666.9	15.6458	15.6139	15.1077	14.9595	15.2501	15.16
A_55_P2124528	0.0952892	0.214567	1.20187	up	NM_009795	chr7:30972021-30971962	Capns1	Mus musculus calpain, small subunit 1 (Capns1), mRNA [NM_009795]	GO:0005737|GO:0004198|GO:0046982|GO:0016020|GO:0005886|GO:0005509|GO:0006508|GO:0046872|GO:0070062|GO:0005829	NM_009795	Mm.439782	12336	6609.32	9131.58	13.0266	12.7613	9148.71	4965.64	5713.6	10126.6	8826.04	8442.05	12.9797	12.9118	13.1881	12.9381	12.6514	12.6944
A_51_P338317	0.262345	0.398523	1.33632	up	NM_145491	chr17:87399105-87399164	Rhoq	Mus musculus ras homolog gene family, member Q (Rhoq), mRNA [NM_145491]	GO:0032427|GO:0005515|GO:0008286|GO:0032869|GO:0030036|GO:0005886|GO:0007264|GO:0005884|GO:0008360|GO:0003924|GO:0051491|GO:0005525|GO:0005622|GO:0006184|GO:0005737|GO:0016020|GO:0000166|GO:0030866|GO:0046326|GO:0045944|GO:0046325|GO:0090005|GO:0045121|GO:0005522	NM_145491	Mm.826	104215	797.732	956.605	9.83467	9.4164	1528.8	380.671	483.729	912.028	974.566	983.221	10.4445	9.36821	9.6913	9.42273	9.35151	9.47497
A_51_P210956	0.0496183	0.14847	1.93321	up	NM_011693	chr3:115813275-115813216	Vcam1	Mus musculus vascular cell adhesion molecule 1 (Vcam1), mRNA [NM_011693]	GO:0060710|GO:0005886|GO:0005783|GO:0002102|GO:0030175|GO:0031225|GO:0005615|GO:0071944|GO:0060669|GO:0007507|GO:0016337|GO:0042102|GO:0007159|GO:0016032|GO:0071333|GO:0007155|GO:0050839|GO:0007157|GO:0005794|GO:0009986|GO:0045177|GO:0042383|GO:0005902|GO:0008131|GO:0005178|GO:0071065|GO:0016020|GO:0060326|GO:0009308|GO:0016021|GO:0061032|GO:0005769|GO:0009897|GO:0055114	NM_011693	Mm.76649	22329	796.301	801.08	10.0855	9.13451	794.647	722.5	871.756	671.832	773.119	958.291	9.49992	10.2219	10.5347	8.9705	8.99685	9.43619
A_55_P1959718	0.0162327	0.08307	2.66718	up	NM_177025	chr2:64926473-64926414	Cobll1	Mus musculus Cobl-like 1 (Cobll1), transcript variant 1, mRNA [NM_177025]	GO:0008150|GO:0003674|GO:0070062	NM_177025	Mm.34159	319876	1561.25	1009.43	10.9152	9.49984	2112.09	1824.11	747.556	943.482	990.572	1094.22	10.9198	11.5119	10.3138	9.47281	9.38084	9.64588
A_51_P258848	0.343285	0.47783	1.23502	up	NM_028955	chr7:128158205-128158264	4933427G17Rik	Mus musculus RIKEN cDNA 4933427G17 gene (4933427G17Rik), mRNA [NM_028955]	GO:0008150|GO:0003674|GO:0005575	NM_028955	Mm.189707	74466	24.2033	36.1748	4.88923	4.5847	46.392	11.5226	14.6953	27.4682	42.8995	38.1566	5.38179	4.52144	4.76446	4.34646	4.74733	4.6603
A_52_P316437	0.577035	0.685668	1.14347	up	NM_001081400	chr16:8855937-8855996	1810013L24Rik	Mus musculus RIKEN cDNA 1810013L24 gene (1810013L24Rik), mRNA [NM_001081400]	GO:0008150|GO:0003674|GO:0005575	NM_001081400	Mm.390868	69053	117.702	181.593	7.13955	6.94613	227.419	71.1488	54.5378	170.889	203.719	170.169	7.71741	7.06261	6.63863	6.97792	7.02586	6.83462
A_55_P1971139	0.149188	0.278305	1.38612	up	NM_001004147	chr11:35611579-35611520	Fbll1	Mus musculus fibrillarin-like 1 (Fbll1), mRNA [NM_001004147]	GO:0030529|GO:0006364|GO:0003723|GO:0008168|GO:0005634|GO:0032259|GO:0016740|GO:0008033	NM_001004147	Mm.189222	237730	24.6537	38.6983	5.16554	4.69449	30.0478	22.9512	20.9621	33.8949	48.7316	33.4684	4.7329	5.49717	5.26655	4.65365	4.94834	4.48147
A_51_P123795	0.208256	0.341787	1.23382	up	NM_177684	chr6:117795865-117795924	Zfp637	Mus musculus zinc finger protein 637 (Zfp637), mRNA [NM_177684]	GO:0008150|GO:0005634|GO:0003676|GO:0046872	NM_177684	Mm.290847	232337	405.644	655.362	9.13571	8.83258	491.658	325.094	400.18	621.627	759.227	585.231	8.81026	9.15464	9.44222	8.85655	8.9694	8.67178
A_52_P312563	0.639968	0.734989	1.20843	up	NM_026440	chr18:68471340-68473343	Rnmt	Mus musculus RNA (guanine-7-) methyltransferase (Rnmt), transcript variant 1, mRNA [NM_026440]	GO:0043235|GO:0006397|GO:0003723|GO:0008168|GO:0004482|GO:0006370|GO:0080009|GO:0005634|GO:0032259|GO:0016740|GO:0005845	NM_026440	Mm.27544	67897	189.419	235.489	7.59464	7.32151	416.046	93.0873	59.1229	194.815	260.642	251.009	8.58658	7.4464	6.75095	7.16708	7.3915	7.40595
A_55_P2171493	0.593412	0.698411	1.14885	up	NM_153544	chr11:102126433-102126492	BC030867	Mus musculus cDNA sequence BC030867 (BC030867), mRNA [NM_153544]	GO:0008150|GO:0003674|GO:0005575	NM_153544	Mm.247335	217216	114.236	212.215	7.36448	7.16429	126.588	117.859	98.2608	260.286	193.063	183.298	6.8626	7.77356	7.45729	7.60291	6.94692	6.94304
A_55_P2113061	0.937331	0.958848	1.02305	up		chr5:145976694-145976753							628.045	960.736	9.45554	9.42267	1234.06	401.809	248.265	874.982	1023.97	983.259	10.1424	9.43709	8.78712	9.35932	9.43319	9.4755
A_52_P24428	0.000314359	0.0244043	1.97212	up	BC059876	chr8:125407416-125407357	Ankrd11	ankyrin repeat domain 11 [Source:MGI Symbol;Acc:MGI:1924337] [ENSMUST00000098334]	GO:0060348|GO:0003674|GO:0005737|GO:0060325|GO:0035264|GO:0005886|GO:0001894|GO:0060323|GO:0048705|GO:0042475|GO:0005634|GO:0001701		Mm.31567	77087	8810.79	7466.34	13.4545	12.4747	11804.6	7834.93	6792.87	7031.12	7504.45	7863.44	13.3407	13.5702	13.4525	12.4169	12.4283	12.579
A_52_P546552	0.0907669	0.208914	1.36301	up	NM_029231	chr11:70207282-70206484	Pelp1	Mus musculus proline, glutamic acid and leucine rich protein 1 (Pelp1), mRNA [NM_029231]	GO:0008150|GO:0005737|GO:0071339|GO:0005730|GO:0005634|GO:0006351	NM_029231	Mm.340601	75273	274.782	414.677	8.59996	8.15317	334.899	270.141	219.307	439.209	407.681	397.141	8.28921	8.90374	8.60693	8.34042	8.02889	8.09019
A_52_P143477	0.00305089	0.0419542	1.87035	up	NM_009443	chr6:72559181-72559122	Tgoln1	Mus musculus trans-golgi network protein (Tgoln1), mRNA [NM_009443]	GO:0005802|GO:0005794|GO:0016020|GO:0005886|GO:0016021	NM_009443	Mm.246563	22134	2082.41	1875.78	11.3209	10.4176	3371.98	1349.36	1525.88	1815.92	2036.19	1775.24	11.5559	11.0793	11.3276	10.4334	10.4612	10.3583
A_55_P2132805	0.911227	0.940998	1.02635	up	NM_001081267	chr7:104841145-104841204	Rsf1	Mus musculus remodeling and spacing factor 1 (Rsf1), mRNA [NM_001081267]	GO:0042393|GO:0006352|GO:0006334|GO:0016584|GO:0006338|GO:0005634|GO:0045893|GO:0031213|GO:0045892|GO:0046872|GO:0050434|GO:0043392	NM_001081267	Mm.43977	233532	63.974	109.056	6.243	6.20547	126.678	30.9514	34.2924	100.355	108.717	118.095	6.86364	5.90951	5.95584	6.22008	6.09756	6.29879
A_55_P2405774	0.347152	0.48131	1.34945	up	AK045831	chr5:32776516-32776575	E230008O15Rik	Mus musculus adult male corpora quadrigemina cDNA, RIKEN full-length enriched library, clone:B230313E11 product:unclassifiable, full insert sequence. [AK045831]			Mm.441931	319862	277.855	336.287	8.28148	7.84911	565.39	152.538	115.639	356.003	312.903	339.954	9.02018	8.13115	7.69312	8.04082	7.65187	7.85464
A_51_P433778	0.0450608	0.140339	1.51995	up	NM_009354	chr13:73786429-73786488	Tert	Mus musculus telomerase reverse transcriptase (Tert), mRNA [NM_009354]	GO:0005515|GO:0003721|GO:0003720|GO:0003723|GO:0005634|GO:0042803|GO:0046872|GO:0005737|GO:0003964|GO:0022616|GO:2001240|GO:0006278|GO:0005697|GO:0000781|GO:0005694|GO:0016779|GO:0003677|GO:0016605|GO:0030529|GO:0032203|GO:0005654|GO:0007004|GO:0090399|GO:0016740|GO:0070034	NM_009354	Mm.10109	21752	195.893	247.816	8.01398	7.40996	314.431	165.306	107.941	236.933	260.953	245.564	8.2052	8.23827	7.59848	7.46411	7.39299	7.37277
A_52_P644925	4.54983e-05	0.0171046	2.69563	up	NM_198035	chr10:127183894-127183953	Zbtb39	Mus musculus zinc finger and BTB domain containing 39 (Zbtb39), mRNA [NM_198035]	GO:0008150|GO:0003674|GO:0005634|GO:0005575|GO:0046872	NM_198035	Mm.27258	320080	255.554	191.96	8.46095	7.03033	369.166	209.203	188.293	172.233	194.854	208.792	8.42527	8.5651	8.39249	6.991	6.96339	7.1366
A_55_P2131048	0.00107047	0.0314539	5.50166	up		chr4:010915279-010915338							369.759	137.959	8.99214	6.53227	433.077	420.026	256.172	109.401	139.704	164.771	8.64853	9.49683	8.83106	6.33499	6.47225	6.78958
A_51_P108020	0.0376511	0.12774	1.72852	up	NM_001029929	chr11:70279625-70279684	Zmynd15	Mus musculus zinc finger, MYND-type containing 15 (Zmynd15), mRNA [NM_001029929]	GO:0006355|GO:0005737|GO:0042826|GO:0007286|GO:0005634|GO:0007283|GO:0045892|GO:0046872|GO:0030154|GO:0006351	NM_001029929	Mm.472771	574428	212.472	257.762	8.24249	7.45296	261.295	170.822	205.297	293.357	213.217	266.713	7.92771	8.28772	8.51205	7.76654	7.09856	7.49376
A_55_P2009622	0.297024	0.431858	1.33814	up	NM_029036	chr4:128855545-128855486	S100pbp	Mus musculus S100P binding protein (S100pbp), mRNA [NM_029036]	GO:0008150|GO:0005634|GO:0048306	NM_029036	Mm.172064	74648	14.8847	23.0449	4.33809	3.91786	23.9511	10.8931	9.80977	25.7941	14.6595	28.6811	4.39244	4.44283	4.17899	4.25727	3.23526	4.26106
A_55_P1955970	3.34452e-05	0.0170807	2.15816	up	NM_001285446	chr2:154364934-154364993	Cbfa2t2	Mus musculus core-binding factor, runt domain, alpha subunit 2, translocated to, 2 (human) (Cbfa2t2), transcript variant 3, mRNA [NM_001285446]	GO:0005515|GO:0006355|GO:0003700|GO:0045944|GO:0003714|GO:0030855|GO:0010976|GO:0005634|GO:2001141|GO:0045892|GO:0046872	NM_001285446	Mm.29914	12396	1219.86	1037.19	10.6544	9.54456	1672.92	992.494	994.163	1020.79	1058.25	1032.52	10.5822	10.6503	10.7306	9.59697	9.48356	9.55314
A_51_P118603	0.188608	0.320605	1.33769	up	NM_029896	chr9:106093154-106093213	Wdr82	Mus musculus WD repeat domain containing 82 (Wdr82), mRNA [NM_029896]	GO:0035097|GO:0048188|GO:0003682|GO:0005634|GO:0072357|GO:0042800|GO:0000785|GO:0051568	NM_029896	Mm.265125	77305	1455.32	2006.89	10.939	10.5193	1496.55	1516.55	1352.85	1860.97	2178.26	1981.44	10.4137	11.2478	11.1556	10.4719	10.554	10.532
A_55_P1980341	0.0117139	0.0709003	1.37392	up	NM_025946	chr2:155971470-155971529	Romo1	Mus musculus reactive oxygen species modulator 1 (Romo1), transcript variant 1, mRNA [NM_025946]	GO:0005739|GO:0003674|GO:0008284|GO:0016020|GO:0034614|GO:0005743|GO:0001302|GO:0016021|GO:2000379|GO:0042742	NM_025946	Mm.371623	67067	7412.62	9068.17	13.2099	12.7516	9693.49	6771.48	5772.91	9497.99	8721.95	8984.57	13.0656	13.3592	13.2048	12.8384	12.6349	12.7814
A_51_P506787	0.853501	0.900166	1.04077	up	NM_001146707	chr10:110934911-110934970	Nap1l1	Mus musculus nucleosome assembly protein 1-like 1 (Nap1l1), transcript variant 1, mRNA [NM_001146707]	GO:0005515|GO:0006334|GO:0005634	NM_001146707	Mm.290407	53605	299.986	586.252	8.70866	8.651	362.544	322.47	214.943	438.499	602.635	717.622	8.39997	9.14527	8.58074	8.3371	8.62854	8.98736
A_51_P234788	0.589349	0.694935	1.13716	up	NM_133687	chr18:36021053-36021112	Cxxc5	Mus musculus CXXC finger 5 (Cxxc5), mRNA [NM_133687]	GO:0007165|GO:0005737|GO:0005730|GO:0008270|GO:0005634|GO:0004871|GO:0043123|GO:0003677|GO:0046872|GO:0043231	NM_133687	Mm.94560	67393	151.445	271.411	7.70442	7.51898	211.794	90.721	151.819	295.924	204.127	314.183	7.61814	7.40844	8.08669	7.78043	7.02969	7.74683
A_55_P2088440	0.294349	0.429251	1.21152	up	NM_027560	chr8:73359124-73359065	Arrdc2	Mus musculus arrestin domain containing 2 (Arrdc2), mRNA [NM_027560]	GO:0008150|GO:0007165|GO:0003674|GO:0005886|GO:0031410	NM_027560	Mm.24215	70807	305.444	461.906	8.58622	8.3094	537.677	204.746	173.91	505.46	472.656	407.603	8.94404	8.53703	8.27761	8.54416	8.25478	8.12926
A_52_P63343	0.0182039	0.0880584	11.2432	up	NM_001033302	chr3:95682492-95682433	Ciart	Mus musculus circadian associated repressor of transcription (Ciart), mRNA [NM_001033302]	GO:0005515|GO:0006355|GO:0005634|GO:0048511|GO:0001046|GO:0045892|GO:0032922|GO:0006351	NM_001033302	Mm.331218	229599	438.083	89.837	8.91679	5.42581	901.646	205.631	206.972	33.8007	37.8195	197.891	9.6826	8.5444	8.52336	4.65022	4.56165	7.06554
A_52_P215469	0.369207	0.501906	1.25275	up	NM_133942	chr7:138054507-138054566	Plekha1	Mus musculus pleckstrin homology domain containing, family A (phosphoinositide binding specific) member 1 (Plekha1), mRNA [NM_133942]	GO:0050853|GO:0051898|GO:0070301|GO:0005886|GO:0001553|GO:0048705|GO:0005634|GO:0007283|GO:0009791|GO:0031529|GO:0008289|GO:0045184|GO:0005737|GO:0035264|GO:0060021|GO:0070062|GO:0008209|GO:0043325|GO:0032587|GO:0030165|GO:0014065|GO:0008585|GO:0008210|GO:0016020|GO:0060325|GO:0033327|GO:0048008	NM_133942	Mm.323554	101476	100.758	145.822	6.94259	6.61749	186.783	43.1031	72.3886	118.069	173.719	145.678	7.42143	6.37541	7.03091	6.44297	6.79399	6.61552
A_55_P2092364	0.00255155	0.0393793	2.04636	up	NM_001039552	chr17:15201119-15201178	Ermard	Mus musculus ER membrane associated RNA degradation (Ermard), transcript variant 1, mRNA [NM_001039552]	GO:0008150|GO:0003674|GO:0005575	NM_001039552	Mm.482357	381062	1052.43	971.722	10.4592	9.42612	1379.84	869.79	907.648	775.675	1124.21	1015.28	10.296	10.4792	10.6024	9.177	9.57434	9.52701
A_55_P2136737	0.774601	0.841729	1.07578	up	NR_030673	chr5:104980887-104980946	D930016D06Rik	Mus musculus RIKEN cDNA D930016D06 gene (D930016D06Rik), long non-coding RNA [NR_030673]	GO:0008150|GO:0003674|GO:0005575	NR_030673	Mm.319836	100662	84.807	134.856	6.62183	6.51645	171.528	41.7184	41.1744	119.81	144.152	140.607	7.30484	6.33169	6.22896	6.4655	6.52079	6.56306
A_55_P2002113	0.00765394	0.0593117	1.53637	up	NM_018730	chr17:56753612-56753674	Rpl36	Mus musculus ribosomal protein L36 (Rpl36), mRNA [NM_018730]	GO:0005622|GO:0003674|GO:0003735|GO:0030529|GO:0005840|GO:0006412	NM_018730	Mm.11376	54217	50309.6	59698	16.0523	15.4327	68773.1	41639.9	40516	61807.8	56803	60483.3	15.8099	16.1682	16.1787	15.4618	15.3747	15.4618
A_52_P91618	0.133748	0.260711	1.37464	up	NM_030257	chr13:81809884-81809943	Lysmd3	Mus musculus LysM, putative peptidoglycan-binding, domain containing 3 (Lysmd3), mRNA [NM_030257]	GO:0008150|GO:0003674|GO:0016020|GO:0016021|GO:0005575	NM_030257	Mm.259969	80289	1029.12	1421.87	10.4359	9.97688	1311.39	846.338	929.622	990.944	1698.66	1575.99	10.2271	10.4418	10.6389	9.54949	10.1938	10.1874
A_55_P2023424	0.105353	0.226943	1.32056	up	NM_001242389	chr17:57402779-57402838	Trip10	Mus musculus thyroid hormone receptor interactor 10 (Trip10), transcript variant 1, mRNA [NM_001242389]	GO:0005515|GO:0005794|GO:0030036|GO:0005886|GO:0005874|GO:0005634|GO:0042538|GO:0042995|GO:0005764|GO:0043231|GO:0042802|GO:0006897|GO:0008289|GO:0005737|GO:0016020|GO:0005856|GO:0070062	NM_001242389	Mm.37368	106628	4224.78	5089.41	12.3079	11.9068	6711.5	3404.69	2558.15	5682.79	5106.25	4479.19	12.5573	12.3566	12.01	12.1149	11.846	11.7596
A_52_P574653	0.653777	0.746867	1.03972	up	NM_007544	chr6:120843523-120843464	Bid	Mus musculus BH3 interacting domain death agonist (Bid), mRNA [NM_007544]	GO:0005515|GO:2001238|GO:0032459|GO:0006626|GO:0001836|GO:2000045|GO:0005829|GO:0005739|GO:0005622|GO:0005737|GO:0008637|GO:0042127|GO:0090200|GO:0051260|GO:0032461|GO:0031625|GO:0032464|GO:0043065|GO:0006919|GO:0090150|GO:0005623|GO:0006915|GO:0042981|GO:0097191|GO:0042770|GO:0016020|GO:0032592	NM_007544	Mm.235081	12122	235.536	446.046	8.3126	8.2564	365.653	174.26	166.694	378.06	453.742	506.337	8.41193	8.3107	8.21517	8.12323	8.19073	8.45524
A_52_P625244	0.0465816	0.143209	1.63756	up	NM_011668	chr7:66561271-66561330	Ube3a	Mus musculus ubiquitin protein ligase E3A (Ube3a), transcript variant 2, mRNA [NM_011668]	GO:0005515|GO:0006511|GO:0000502|GO:0004842|GO:0060736|GO:0016567|GO:0016874|GO:0003713|GO:0005634|GO:0014068|GO:0051865|GO:0005829|GO:0001541|GO:0005737|GO:0042787|GO:0045944|GO:0070936|GO:2001141|GO:0035037|GO:0030521	NM_011668	Mm.9002	22215	286.495	312.518	8.4526	7.74106	529.147	166.894	163.445	281.841	303.748	351.965	8.92007	8.25328	8.18445	7.71278	7.60742	7.90296
A_51_P118223	0.50811	0.62694	1.15192	up	NR_002928	chr15:8043015-8042956	Gm1943	Mus musculus predicted gene 1943 (Gm1943), non-coding RNA [NR_002928]		NR_002928	Mm.390083	384864	52.2724	95.0429	6.20938	6.00534	65.5613	55.6224	35.6334	97.0262	105.636	82.4667	5.89584	6.71664	6.01565	6.1733	6.06033	5.78238
A_55_P2076524	0.0013637	0.0332808	1.87915	up	NR_038042	chr10:82286905-82286964	1700028I16Rik	Mus musculus RIKEN cDNA 1700028I16 gene (1700028I16Rik), long non-coding RNA [NR_038042]	GO:0008150|GO:0003674|GO:0005575	NR_038042	Mm.48789	70003	140.4	154.112	7.62548	6.7154	193.864	115.571	111.764	159.326	157.634	145.376	7.48283	7.74277	7.65085	6.88567	6.64799	6.61254
A_55_P2234889	0.040876	0.133392	1.51196	up		chr13:046793490-046793431		Q4YZ66_PLABE (Q4YZ66) Pb-reticulocyte binding protein (Fragment), partial (12%) [TC1669239]					40.3222	50.5032	5.68255	5.08613	73.3903	24.4508	23.1255	46.696	50.7443	54.0695	6.06163	5.57618	5.40984	5.10502	5.00265	5.15073
A_51_P116326	0.72375	0.80346	1.0272	up	NM_145526	chr2:84838957-84838898	P2rx3	Mus musculus purinergic receptor P2X, ligand-gated ion channel, 3 (P2rx3), mRNA [NM_145526]	GO:0043005|GO:0030424|GO:0009408|GO:0009409|GO:0007268|GO:0019228|GO:0005639|GO:0009266|GO:0009743|GO:0034220|GO:0050909|GO:0043197|GO:0048167|GO:0043195|GO:0043025|GO:0006810|GO:0033198|GO:0001614|GO:0051260|GO:0014832|GO:0006812|GO:0006811|GO:0035590|GO:0005791|GO:0001666|GO:0005794|GO:0010033|GO:0004931|GO:0007274|GO:0030432|GO:0005524|GO:0009612|GO:0043235|GO:0016020|GO:0005887|GO:0045121|GO:…	NM_145526	Mm.440375	228139	20.6935	39.8658	4.78372	4.74501	34.9879	13.3803	13.7122	37.9033	43.9727	37.7215	4.95427	4.73689	4.66001	4.80857	4.78344	4.64302
A_51_P265571	0.00167932	0.0346886	4.52708	up	NM_009627	chr7:117773088-117773147	Adm	Mus musculus adrenomedullin (Adm), mRNA [NM_009627]	GO:0008284|GO:0008285|GO:0031700|GO:2001214|GO:0060712|GO:0031102|GO:0060670|GO:0030819|GO:0007204|GO:0005615|GO:0055074|GO:0007507|GO:0031623|GO:0005737|GO:0048589|GO:0045906|GO:0045909|GO:0032496|GO:0006171|GO:0043065|GO:0008209|GO:0009611|GO:0001843|GO:0005576|GO:0002031|GO:0045766|GO:0046879|GO:0005179|GO:0002026|GO:0010460|GO:0097084|GO:0001570|GO:0043116	NM_009627	Mm.1408	11535	384.94	161.006	8.95316	6.77458	587.715	372.076	195.029	172.207	152.772	158.039	9.07725	9.34033	8.4419	6.99068	6.60451	6.72856
A_52_P507214	0.546361	0.659511	1.18764	up	NM_013599	chr2:164780620-164780679	Mmp9	Mus musculus matrix metallopeptidase 9 (Mmp9), mRNA [NM_013599]	GO:0048771|GO:0071460|GO:0051549|GO:0048147|GO:0050900|GO:2001258|GO:0051259|GO:0005615|GO:0032403|GO:0046872|GO:0042802|GO:0031915|GO:0030198|GO:0030574|GO:0006508|GO:1900122|GO:0001968|GO:0006979|GO:0019087|GO:0043065|GO:0007566|GO:0042493|GO:0005578|GO:0005576|GO:0045766|GO:0031012|GO:0043234|GO:0001501|GO:0001503|GO:0016787|GO:0002687|GO:0008233|GO:0008270|GO:0004222|GO:0008237	NM_013599	Mm.4406	17395	12.874	24.4401	4.20398	3.95587	16.548	12.6563	9.41789	14.9975	35.1549	23.1679	3.83467	4.65622	4.12104	3.45655	4.46117	3.94991
A_52_P134639	0.120683	0.244737	1.92796	up	NM_009444	chr6:72561439-72561380	Tgoln2	Mus musculus trans-golgi network protein 2 (Tgoln2), mRNA [NM_009444]	GO:0005802|GO:0005794|GO:0016020|GO:0005886|GO:0016021|GO:0030140	NM_009444	Mm.246563	22135	705.101	547.495	9.50716	8.56008	1508.72	343.845	262.744	453.484	640.932	548.07	10.4267	9.23115	8.86367	8.38904	8.72422	8.56698
A_55_P2325803	0.168217	0.298764	1.30471	up	NM_009399	chr1:107741892-107741951	Tnfrsf11a	Mus musculus tumor necrosis factor receptor superfamily, member 11a (Tnfrsf11a), mRNA [NM_009399]	GO:0005515|GO:0071848|GO:0005886|GO:0046872|GO:0060086|GO:0048535|GO:0051091|GO:0051092|GO:0032496|GO:0071847|GO:0043507|GO:0034097|GO:0070555|GO:0071812|GO:0009986|GO:0030316|GO:0007275|GO:0012501|GO:0033209|GO:0002250|GO:0019955|GO:0005031|GO:0016020|GO:0001503|GO:0034612|GO:0016021|GO:0009897|GO:0060749|GO:0004888	NM_009399	Mm.6251	21934	413.7	635.347	9.16862	8.78489	501.197	358.063	381.84	733.283	601.184	571.572	8.84238	9.28468	9.37879	9.09992	8.62487	8.62989
A_66_P116299	0.139364	0.266529	1.35366	up	NM_019663	chr9:62729730-62729671	Pias1	Mus musculus protein inhibitor of activated STAT 1 (Pias1), mRNA [NM_019663]	GO:0005515|GO:0016874|GO:0032436|GO:0005634|GO:0046872|GO:0005622|GO:0019789|GO:0042127|GO:0033235|GO:0051152|GO:2001141|GO:0031625|GO:0006355|GO:0003714|GO:0016925|GO:0019904|GO:0000122|GO:0003676|GO:0007259|GO:0003677|GO:0065004|GO:0006351|GO:0016605|GO:0008270|GO:0019899|GO:0045893	NM_019663	Mm.431253	56469	857.903	1195.13	10.1953	9.75838	925.42	852.966	795.323	1175.4	1218.44	1191.54	9.72601	10.4519	10.4079	9.81045	9.69783	9.76687
A_51_P112557	0.267237	0.403096	1.08994	up	NM_009085	chr17:46381264-46381120	Polr1c	Mus musculus polymerase (RNA) I polypeptide C (Polr1c), mRNA [NM_009085]	GO:0008150|GO:0005736|GO:0003899|GO:0001056|GO:0001054|GO:0046983|GO:0005666|GO:0005634|GO:0003677|GO:0006351	NM_009085	Mm.3458	20016	649.008	1074.96	9.71412	9.58987	1011.54	462.366	473.118	950.296	1222.79	1051.78	9.85893	9.62105	9.66237	9.48496	9.70158	9.58308
A_55_P1997132	0.0319862	0.117142	5.13268	up		chr17:035445772-035445713							34.0987	13.539	5.55587	3.19616	22.8455	49.1409	30.3098	17.0075	16.2249	7.38476	4.32041	6.55352	5.79369	3.6572	3.35676	2.57452
A_52_P305949	0.0291627	0.110913	1.74608	up	NM_010806	chr17:13989328-13989387	Mllt4	Mus musculus myeloid/lymphoid or mixed-lineage leukemia (trithorax homolog, Drosophila); translocated to, 4 (Mllt4), mRNA [NM_010806]	GO:0005515|GO:0030054|GO:0005886|GO:0045177|GO:0005634|GO:0007165|GO:0005737|GO:0005913|GO:0005912|GO:0005911|GO:0030274|GO:0007155|GO:0050839	NM_010806	Mm.59167	17356	21.5088	25.2441	4.88339	4.07927	32.2917	19.5237	12.7111	19.7533	31.3361	24.6428	4.83852	5.26222	4.54943	3.87839	4.30762	4.05179
A_55_P2075474	0.130648	0.256837	1.17449	up	NM_029607	chr2:180449577-180451608	Gid8	Mus musculus GID complex subunit 8 homolog (S. cerevisiae) (Gid8), transcript variant 1, mRNA [NM_029607]	GO:0008150|GO:0003674|GO:0030054|GO:0005634	NM_029607	Mm.41464	76425	209.571	368.226	8.19702	7.96498	293.696	166.617	168.398	309.797	454.45	340.431	8.10961	8.25092	8.23053	7.84591	8.19305	7.85599
A_52_P587642	0.00362402	0.0445536	1.7781	up	NM_007916	chr8:113499448-113499389	Ddx19a	Mus musculus DEAD (Asp-Glu-Ala-Asp) box polypeptide 19a (Ddx19a), mRNA [NM_007916]	GO:0043065|GO:0003723|GO:0004386|GO:0005634|GO:0003676|GO:0015031|GO:0005524|GO:0005737|GO:0000166|GO:0016020|GO:0016787|GO:0005643|GO:0006810|GO:0051028	NM_007916	Mm.287901	13680	190.56	224.817	8.07515	7.24481	253.423	157.87	160.388	189.864	269.007	215.579	7.88442	8.18057	8.16044	7.1214	7.4351	7.17794
A_51_P411297	0.0112299	0.069746	2.79063	up	NM_016714	chr15:84770217-84770276	Nup50	Mus musculus nucleoporin 50 (Nup50), mRNA [NM_016714]	GO:0005622|GO:0005515|GO:0031965|GO:0005487|GO:0005643|GO:0030529|GO:0005623|GO:0005634|GO:0006913|GO:0001841	NM_016714	Mm.28379	18141	898.89	617.737	10.2346	8.75398	870.654	1084.73	741.281	594.216	662.103	596.89	9.63123	10.7738	10.2987	8.79458	8.76752	8.69983
A_51_P111612	0.627393	0.725607	1.0729	up	NM_001042592	chr7:75881964-75881905	Arrdc4	Mus musculus arrestin domain containing 4 (Arrdc4), transcript variant 1, mRNA [NM_001042592]	GO:0003674|GO:0005886|GO:0051443|GO:0005768	NM_001042592	Mm.251199	66412	738.763	1249.4	9.90951	9.808	1094.78	504.602	616.911	1487.35	1148.32	1112.53	9.96995	9.73672	10.0219	10.1507	9.60425	9.66903
A_55_P2039038	0.894847	0.92965	1.02601	up	NM_001081750	chr5:125365082-125365141	Zfp664	Mus musculus zinc finger protein 664 (Zfp664), mRNA [NM_001081750]	GO:0008150|GO:0006355|GO:0005634|GO:0003676|GO:0003677|GO:0046872|GO:0006351	NM_001081750	Mm.138617	269704	121.943	214.902	7.2387	7.20166	225.639	60.9073	79.282	220.74	215.612	208.355	7.70765	6.84446	7.164	7.35325	7.11863	7.13309
A_55_P2100715	2.74328e-05	0.0167874	2.16911	up	XM_006516846	chr13:53008364-53008305	Auh	AU RNA binding protein/enoyl-coenzyme A hydratase [Source:MGI Symbol;Acc:MGI:1338011] [ENSMUST00000110031]	GO:0005739|GO:0003723|GO:0008152|GO:0004490|GO:0009083|GO:0003730|GO:0004300|GO:0003824|GO:0016829|GO:0000288	XM_006516846	Mm.252034	11992	121.858	116.03	7.40794	6.29083	175.003	96.4418	94.1303	102.827	125.438	119.825	7.32812	7.49224	7.40344	6.24978	6.30434	6.31838
A_51_P226053	0.00182284	0.0354192	1.42696	up	NM_025291	chr18:36827074-36827015	Sra1	Mus musculus steroid receptor RNA activator 1 (Sra1), transcript variant 1, mRNA [NM_025291]	GO:0003712|GO:0016922|GO:0005667|GO:0006355|GO:0005886|GO:0006357|GO:0008283|GO:0003713|GO:0010861|GO:0006915|GO:0042981|GO:0005634|GO:2000273|GO:0003677|GO:0030154|GO:0006351|GO:0045171|GO:0005737|GO:0030374|GO:0045944|GO:0030529|GO:0015630|GO:0005831|GO:0031252	NM_025291	Mm.29058	24068	2337.1	2866.01	11.5637	11.0508	3136.03	2089.45	1785.81	2714.67	3002.23	2881.12	11.4636	11.6884	11.5391	11.0177	11.0408	11.0938
A_52_P257686	0.0161633	0.0828907	2.07173	up	NM_028456	chr3:120858943-120858884	Rwdd3	Mus musculus RWD domain containing 3 (Rwdd3), transcript variant 2, mRNA [NM_028456]	GO:0008150|GO:0003674|GO:0005737|GO:0005634|GO:0005575	NM_028456	Mm.263163	66568	201.386	190.449	8.03447	6.98363	339.251	146.634	118.274	131.041	212.384	227.921	8.31101	8.06654	7.72586	6.5947	7.09161	7.26459
A_55_P2117375	0.0665838	0.175712	1.66166	up	AK040705	chr11:61678847-61678788	A530017D24Rik	Mus musculus adult male aorta and vein cDNA, RIKEN full-length enriched library, clone:A530017D24 product:unclassifiable, full insert sequence. [AK040705]			Mm.355162	100504229	419.068	434.396	8.95286	8.22023	797.147	239.452	220.604	430.454	410.673	462.062	9.50536	8.73611	8.61711	8.30659	8.0391	8.31501
A_55_P1976108	0.00250951	0.0390323	1.4635	up	NM_001033865	chr11:29445973-29445914	Rps27a	Mus musculus ribosomal protein S27A (Rps27a), transcript variant 2, mRNA [NM_001033865]	GO:0005622|GO:0008150|GO:0005737|GO:0003735|GO:0022627|GO:0030529|GO:0015935|GO:0005840|GO:0005634|GO:0006412|GO:0046872|GO:0070062	NM_001033865	Mm.180003	78294	21872.1	25636.7	14.7942	14.2448	30392.1	18497.8	16726.5	25003.4	24800.5	27106.2	14.6911	14.8978	14.7937	14.2088	14.1721	14.3534
A_55_P2027594	0.000285979	0.0237628	3.08227	up	NM_027748	chr2:9837764-9837705	Taf3	Mus musculus TAF3 RNA polymerase II, TATA box binding protein (TBP)-associated factor (Taf3), mRNA [NM_027748]	GO:0005515|GO:0006355|GO:0005669|GO:0006357|GO:0006366|GO:0005634|GO:0000122|GO:0006351|GO:0043433|GO:0046872|GO:0002039|GO:0051457|GO:0008270	NM_027748	Mm.86343	209361	379.213	245.832	9.02456	7.40057	501.049	352.217	284.373	244.425	254.621	238.452	8.84199	9.26332	8.96838	7.51007	7.3588	7.33284
A_55_P2116988	0.00355838	0.0441858	1.75947	up	AK006313	chr17:3084560-3084619	1700024P12Rik	Mus musculus adult male testis cDNA, RIKEN full-length enriched library, clone:1700024P12 product:unclassifiable, full insert sequence. [AK006313]	GO:0008150|GO:0003674|GO:0005575		Mm.335641	69392	49.756	59.4501	6.13017	5.31503	71.5925	40.9922	36.6833	57.1737	68.5231	52.6536	6.02473	6.3047	6.06108	5.4016	5.42668	5.1168
A_55_P2093543	0.0342904	0.121551	1.83392	up	NM_172339	chr2:26218353-26218294	Snapc4	Mus musculus small nuclear RNA activating complex, polypeptide 4 (Snapc4), transcript variant 1, mRNA [NM_172339]	GO:0042796|GO:0006355|GO:0003682|GO:0042795|GO:0005634|GO:0003677|GO:0006351|GO:0019185	NM_172339	Mm.207460	227644	622.897	662.728	9.734	8.85907	676.089	648.401	544.202	707.995	589.369	690.82	9.26968	10.0782	9.85414	9.05162	8.59427	8.93133
A_55_P1980426	0.267299	0.403146	1.66035	up	NM_001291128	chr2:157387696-157387755	Nnat	Mus musculus neuronatin (Nnat), transcript variant 3, mRNA [NM_001291128]	GO:0032880|GO:0005737|GO:0007420|GO:0032024|GO:0007275|GO:0009749	NM_001291128	Mm.34330	18111	36.4972	49.758	5.72051	4.98902	30.1839	35.5294	43.7784	32.6606	73.4989	43.1144	4.7415	6.0995	6.32054	4.59964	5.53483	4.83259
A_51_P362554	0.656093	0.748745	1.05145	up	NM_001011787	chr2:111785008-111784949	Olfr1307	Mus musculus olfactory receptor 1307 (Olfr1307), mRNA [NM_001011787]	GO:0050911|GO:0007608|GO:0007165|GO:0004984|GO:0016020|GO:0007186|GO:0005886|GO:0004930|GO:0016021|GO:0004871|GO:0050896	NM_001011787	Mm.377314	257956	16.7386	31.1268	4.45976	4.38738	28.7904	11.4964	9.92909	26.1639	35.6794	31.537	4.66573	4.51778	4.19576	4.28158	4.48484	4.39572
A_55_P1970621	0.470574	0.593862	1.18119	up	NM_007667	chr8:101554697-101554638	Cdh8	Mus musculus cadherin 8 (Cdh8), transcript variant 2, mRNA [NM_007667]	GO:0016020|GO:0005886|GO:0009409|GO:0005509|GO:0035249|GO:0007268|GO:0043679|GO:0043083|GO:0016021|GO:0007155|GO:0007156|GO:0046872	NM_007667	Mm.441131	12564	33.3184	60.8578	5.5798	5.33956	40.4716	23.8833	35.6005	66.908	66.7206	48.9448	5.18125	5.54419	6.01396	5.62891	5.385	5.00478
A_55_P1990495	0.00474598	0.049285	1.48813	up	NM_011488	chr11:100746373-100746432	Stat5a	Mus musculus signal transducer and activator of transcription 5A (Stat5a), transcript variant 1, mRNA [NM_011488]	GO:0005515|GO:0033026|GO:0003700|GO:0006549|GO:0006366|GO:0019530|GO:0019915|GO:0019221|GO:0001553|GO:0030879|GO:0030155|GO:0048541|GO:0003690|GO:0060376|GO:0043029|GO:0046543|GO:0007565|GO:0033077|GO:0046544|GO:0038161|GO:0019903|GO:0045588|GO:0005509|GO:0018108|GO:0046449|GO:0032825|GO:0000979|GO:0019218|GO:0045086|GO:0045931|GO:0045647|GO:0006600|GO:0008284|GO:0000255|GO:0045579|GO:0043434|GO:…	NM_011488	Mm.277403	20850	422.477	554.202	9.16053	8.58703	598.513	353.251	315.666	517.368	535.339	609.899	9.10291	9.26818	9.1105	8.58427	8.44047	8.73636
A_55_P2241553	8.85651e-05	0.0173213	4.04222	up	NR_045696	chr8:124970309-124970368	9330133O14Rik	Mus musculus RIKEN cDNA 9330133O14 gene (9330133O14Rik), long non-coding RNA [NR_045696]		NR_045696	Mm.471548	100689703	1127.56	527.872	10.5142	8.4991	1655.02	906.793	820.859	416.373	602.359	564.884	10.5655	10.5297	10.4476	8.25775	8.62814	8.61142
A_55_P1967867	0.0105141	0.0675355	1.89493	up	NM_011728	chr4:46197298-46197239	Xpa	Mus musculus xeroderma pigmentosum, complementation group A (Xpa), mRNA [NM_011728]	GO:0005794|GO:0008630|GO:0019904|GO:0009636|GO:0005634|GO:0003677|GO:0046872|GO:0042803|GO:0006974|GO:0045171|GO:0003684|GO:0005622|GO:0005737|GO:0006281|GO:0035264|GO:0006289|GO:0006979|GO:0009411	NM_011728	Mm.247036	22590	627.905	615.9	9.6484	8.72625	1008.69	386.626	488.401	466.656	708.939	672.107	9.85381	9.38578	9.70561	8.42829	8.86614	8.88432
A_51_P100298	0.257678	0.39361	1.13605	up	NM_152220	chr19:11859903-11857591	Stx3	Mus musculus syntaxin 3 (Stx3), transcript variant A, mRNA [NM_152220]	GO:0005515|GO:0043005|GO:0005886|GO:0050544|GO:0042581|GO:0031201|GO:0042582|GO:0060291|GO:0006887|GO:0006886|GO:0030425|GO:0031175|GO:0030426|GO:0016324|GO:0005911|GO:0006836|GO:0006810|GO:0061025|GO:0016192|GO:0030141|GO:0070062|GO:0005623|GO:0005484|GO:0016020|GO:0016021	NM_152220	Mm.272264	20908	524.395	856.537	9.41831	9.23429	811.325	415.978	345.882	705.179	1011.4	853.032	9.53107	9.48649	9.23738	9.04588	9.41058	9.24643
A_55_P1996421	0.0693093	0.17967	1.36827	up		chr1:194714995-194715054							7929.56	9904.8	13.3319	12.8795	9186.79	8025.01	6576.89	9862.47	9913	9938.93	12.9857	13.5991	13.4108	12.8962	12.8257	12.9167
A_52_P132165	0.163219	0.293235	1.63546	up	NM_053262	chr5:104419186-104419127	Hsd17b11	Mus musculus hydroxysteroid (17-beta) dehydrogenase 11 (Hsd17b11), mRNA [NM_053262]	GO:0006629|GO:0005811|GO:0006694|GO:0005737|GO:0004303|GO:0008152|GO:0016491|GO:0016229|GO:0005576|GO:0006710|GO:0055114	NM_053262	Mm.46019	114664	13576.1	12133.7	13.8898	13.1801	22753.2	5511.01	12464	12553.2	11337.7	12510.2	14.2615	13.0703	14.3376	13.241	13.0431	13.2562
A_55_P2160528	0.226132	0.361029	1.44487	up	NM_080440	chr12:82317768-82317709	Slc8a3	Mus musculus solute carrier family 8 (sodium/calcium exchanger), member 3 (Slc8a3), transcript variant 2, mRNA [NM_080440]	GO:0060402|GO:0005886|GO:0005874|GO:0042995|GO:0005432|GO:0030001|GO:0005739|GO:0042383|GO:0043197|GO:0016020|GO:0002244|GO:0005887|GO:0070588|GO:0043025|GO:0015368|GO:0035725|GO:0016021|GO:0071320|GO:0006814	NM_080440	Mm.443748	110893	15.2046	17.9751	4.13456	3.60362	30.8854	6.44648	8.28176	19.043	14.973	19.9093	4.77382	3.68872	3.94113	3.82094	3.25806	3.73186
A_55_P2454099	0.00324644	0.0428632	1.97344	up	NM_023799	chr19:45842426-45842367	Mgea5	Mus musculus meningioma expressed antigen 5 (hyaluronidase) (Mgea5), mRNA [NM_023799]	GO:0060124|GO:0016746|GO:0046060|GO:0051928|GO:0010524|GO:0005634|GO:0003824|GO:0005739|GO:0005737|GO:0010616|GO:0051901|GO:0043243|GO:0006612|GO:0016798|GO:0046326|GO:0032024|GO:0004402|GO:0016231|GO:0070265|GO:0060051|GO:0051054|GO:0016573|GO:0006044|GO:0045862|GO:0031343|GO:0016787|GO:0008152|GO:0016740	NM_023799	Mm.122725	76055	59.8059	62.7045	6.37248	5.39177	89.9424	47.1191	42.3562	66.4089	68.5375	53.167	6.36064	6.48591	6.27089	5.61909	5.42744	5.12877
A_55_P2172227	0.00397731	0.0460997	1.31391	up	NM_177185	chr6:38441791-38441850	Ubn2	Mus musculus ubinuclein 2 (Ubn2), mRNA [NM_177185]	GO:0008150|GO:0003674|GO:0005634|GO:0005615	NM_177185	Mm.302831	320538	57.0056	89.5095	6.30848	5.91462	86.0181	42.2239	42.7747	76.0276	102.485	90.0158	6.29221	6.34603	6.2872	5.80517	6.02457	5.91411
A_55_P2078645	0.270631	0.406407	1.10193	up	NM_029280	chr2:69717219-69717160	Mettl5	Mus musculus methyltransferase like 5 (Mettl5), transcript variant 1, mRNA [NM_029280]	GO:0008150|GO:0008168|GO:0005575|GO:0003676|GO:0032259|GO:0016740	NM_029280	Mm.268657	75422	454.745	756.607	9.19841	9.05838	739.846	321.857	302.53	744.811	797.413	727.596	9.39968	9.14135	9.0542	9.12682	9.04055	9.00776
A_55_P2087061	0.104657	0.226119	1.3865	up	NM_001101506	chr4:155114449-155114508	Tmem240	Mus musculus transmembrane protein 240 (Tmem240), mRNA [NM_001101506]	GO:0008150|GO:0003674|GO:0005575	NM_001101506	Mm.379515	381582	70.8673	95.5653	6.49234	6.02089	128.951	42.219	41.4325	98.9826	92.8346	94.8788	6.89476	6.34532	6.23695	6.20299	5.87348	5.98621
A_55_P1962124	0.00167607	0.0346795	1.86391	up		chr3:006164974-006164915							71.1329	75.977	6.57668	5.67834	116.473	45.0688	51.8563	63.8477	78.408	85.6753	6.72966	6.43146	6.56891	5.56706	5.62778	5.84018
A_55_P2188464	0.000953505	0.030351	2.49634	up	NM_029166	chr10:89280868-89280927	Uhrf1bp1l	Mus musculus UHRF1 (ICBP90) binding protein 1-like (Uhrf1bp1l), mRNA [NM_029166]	GO:0008150|GO:0003674|GO:0005575	NM_029166	Mm.268922	75089	2383.64	1594.77	11.5031	10.1833	3927.89	1727.23	1495.81	1624.73	1604.39	1555.18	11.7798	11.4313	11.2983	10.2746	10.1114	10.164
A_55_P2070769	0.0465258	0.143109	1.26924	up	NM_026824	chr11:120650579-120650520	Dus1l	Mus musculus dihydrouridine synthase 1-like (S. cerevisiae) (Dus1l), mRNA [NM_026824]	GO:0050660|GO:0017150|GO:0016491|GO:0005575|GO:0003824|GO:0008033|GO:0055114	NM_026824	Mm.180622	68730	2350.96	3215.4	11.5607	11.2168	3141.24	2244.39	1667.23	3368.57	3286.35	2991.27	11.4657	11.7763	11.4402	11.3241	11.1744	11.1518
A_55_P2207335	0.65794	0.75056	1.10552	up	NR_045729	chr2:33669043-33669102	Nron	Mus musculus non-protein coding RNA, repressor of NFAT (Nron), long non-coding RNA [NR_045729]	GO:0035305|GO:0030529|GO:0051532|GO:0001817	NR_045729	Mm.442057	320482	86.8148	143.45	6.74495	6.60022	161.027	57.0641	42.3532	149.411	158.791	122.149	7.21369	6.75057	6.27058	6.79572	6.65923	6.34571
A_55_P2037918	0.0131998	0.074768	1.16306	up	XM_006526529	chr18:80216864-80216923	LOC102640717	PREDICTED: Mus musculus transcription elongation factor 1 homolog (LOC102640717), mRNA [XM_006526529]		XM_006526529		102640717	128.888	223.499	7.47086	7.25293	192.144	94.9063	99.6142	212.142	247.147	211.207	7.46768	7.4702	7.47469	7.29671	7.31136	7.15071
A_51_P112445	0.0951175	0.214357	1.38413	up	NM_175552	chr3:99942517-99942458	Wdr3	Mus musculus WD repeat domain 3 (Wdr3), mRNA [NM_175552]	GO:0008150|GO:0031965|GO:0005730|GO:0005634	NM_175552	Mm.24591	269470	637.28	877.755	9.75416	9.28518	735.13	675.591	501.12	824.144	935.972	873.148	9.3893	10.1349	9.73831	9.27324	9.29664	9.28566
A_55_P2305339	0.922649	0.948549	1.01822	up	AK141715	chr13:114765014-114765073	6720427H10Rik	Mus musculus 9 days embryo whole body cDNA, RIKEN full-length enriched library, clone:D030040B09 product:hypothetical protein, full insert sequence. [AK141715]			Mm.441798	77884	33.703	68.8976	5.56711	5.54106	43.877	20.3609	36.8712	63.9935	74.9664	67.7328	5.3027	5.33051	6.06812	5.56961	5.56497	5.4886
A_51_P156434	0.169707	0.30031	2.07607	up	NM_027460	chr4:149126565-149123432	Slc25a33	Mus musculus solute carrier family 25, member 33 (Slc25a33), mRNA [NM_027460]	GO:0005739|GO:0016020|GO:0006810|GO:0005743|GO:0016021	NM_027460	Mm.41877	70556	109.336	74.658	6.67947	5.62562	256.535	33.9132	37.561	56.7023	94.7206	72.5512	7.90303	6.03805	6.09733	5.38929	5.90271	5.58485
A_55_P2077879	0.00686964	0.0572057	1.7958	up	NM_017479	chr14:22490036-22490095	Kat6b	Mus musculus K(lysine) acetyltransferase 6B (Kat6b), transcript variant 1, mRNA [NM_017479]	GO:0016747|GO:0006355|GO:0016746|GO:0016573|GO:0005694|GO:0006334|GO:0005634|GO:0003677|GO:0046872|GO:0006351|GO:0008270|GO:0000786|GO:0004402|GO:0016740|GO:0016568	NM_017479	Mm.248967	54169	87.4939	102.539	6.93337	6.08875	125.356	63.1017	74.0241	75.0569	119.612	112.947	6.84573	6.88885	7.06554	5.78776	6.23489	6.24359
A_51_P439085	0.00623994	0.0549173	7.21474	up	NM_023516	chr6:29225141-29225200	Hilpda	Mus musculus hypoxia inducible lipid droplet associated (Hilpda), transcript variant 2, mRNA [NM_023516]	GO:0005811|GO:0008284|GO:0009986|GO:0005102|GO:0006950|GO:0005576|GO:0010884|GO:0001819|GO:0035425|GO:0005615|GO:0016020|GO:0016021|GO:0030141	NM_023516	Mm.45161	69573	686.942	147.391	9.46909	6.61814	1426.28	422.592	211.956	107.068	185.808	149.297	10.3422	9.50333	8.56169	6.30858	6.89465	6.65119
A_55_P2068560	0.171131	0.301921	1.32718	up	NM_026915	chr9:121487026-121486967	Lyzl4	Mus musculus lysozyme-like 4 (Lyzl4), mRNA [NM_026915]	GO:0008150|GO:0003674|GO:0016998|GO:0003796|GO:0005634|GO:0005576	NM_026915	Mm.33351	69032	15.1063	20.8725	4.23183	3.82346	28.0666	9.7613	7.49089	18.622	23.3721	20.6232	4.62913	4.27513	3.79122	3.79278	3.89078	3.78683
A_55_P2172022	0.0600582	0.165452	1.9296	up	NM_022305	chr4:40756815-40756756	B4galt1	Mus musculus UDP-Gal:betaGlcNAc beta 1,4- galactosyltransferase, polypeptide 1 (B4galt1), mRNA [NM_022305]	GO:0008092|GO:0005515|GO:0030057|GO:0060046|GO:0030112|GO:0030879|GO:0031526|GO:0050900|GO:0042803|GO:0009101|GO:0003945|GO:0030198|GO:0042127|GO:0002064|GO:0070062|GO:0002526|GO:0005794|GO:0009986|GO:0005975|GO:0016757|GO:0048487|GO:0004461|GO:0008378|GO:0042060|GO:0006486|GO:0006487|GO:0009897|GO:0005989|GO:0008285|GO:0005886|GO:0046872|GO:0016323|GO:0007155|GO:0060054|GO:0009312|GO:0030145|GO:…	NM_022305	Mm.15622	14595	112.364	111.105	7.16099	6.21268	194.153	89.4868	53.4513	137.445	107.438	88.4317	7.48498	7.38882	6.60915	6.67213	6.08352	5.88239
A_52_P413502	0.355363	0.489154	1.05793	up	NM_025542	chr2:172294489-172294548	Rtfdc1	Mus musculus replication termination factor 2 domain containing 1 (Rtfdc1), mRNA [NM_025542]	GO:0008150|GO:0003674|GO:0005575	NM_025542	Mm.25157	66404	225.134	425.859	8.27063	8.18939	335.652	173.126	166.623	396.187	491.625	389.764	8.29536	8.30204	8.21448	8.19114	8.31415	8.06289
A_55_P2276761	0.00107637	0.0314539	1.67281	up	NR_038130	chr12:100399548-100399489	4930474N09Rik	Mus musculus RIKEN cDNA 4930474N09 gene (4930474N09Rik), long non-coding RNA [NR_038130]		NR_038130	Mm.87374	67639	77.3257	93.4415	6.7285	5.98623	118.983	61.3058	51.688	87.668	99.2606	93.3957	6.7675	6.85494	6.56306	6.01565	5.98048	5.96256
A_55_P1953796	0.330654	0.465631	1.17726	up	NM_001146023	chr7:29937592-29937533	Fam98c	Mus musculus family with sequence similarity 98, member C (Fam98c), mRNA [NM_001146023]	GO:0008150|GO:0003674|GO:0005575	NM_001146023	Mm.260890	73833	3361.61	4640.57	12.0111	11.7757	5076.48	2037.83	2970.52	4759.7	4197.67	4964.33	12.1513	11.6528	12.2292	11.8559	11.5532	11.9179
A_51_P515649	0.00209718	0.0369584	2.90987	up	NM_053147	chr18:37680669-37680728	Pcdhb22	Mus musculus protocadherin beta 22 (Pcdhb22), mRNA [NM_053147]	GO:0016020|GO:0005886|GO:0016021|GO:0007155	NM_053147	Mm.491305	93893	23.8479	16.3655	5.01825	3.47729	38.7437	15.6356	17.1644	16.5533	12.3164	20.2267	5.11259	4.95289	4.98926	3.61436	3.06107	3.75645
A_55_P2002115	0.0161643	0.0828907	1.83197	up		chr5:137874303-137874362							6739.25	6304.77	13.1033	12.2299	7488.23	6452.8	6276.72	6363.95	5878.03	6672.32	12.7005	13.2934	13.316	12.2717	12.0673	12.3508
A_51_P126177	0.00715713	0.058172	2.27037	up	NM_026160	chr8:124121771-124121830	Map1lc3b	Mus musculus microtubule-associated protein 1 light chain 3 beta (Map1lc3b), mRNA [NM_026160]	GO:0005515|GO:0008017|GO:0030424|GO:0005776|GO:0005875|GO:0005930|GO:0019904|GO:0000421|GO:0005874|GO:0006914|GO:0031410|GO:0030425|GO:0032092|GO:0005622|GO:0005737|GO:0015631|GO:0016020|GO:0043025|GO:0005856	NM_026160	Mm.28357	67443	4258.24	3314.21	12.444	11.2611	4589.37	3945.09	4240.26	3521.86	3365.25	3055.53	12.0083	12.5738	12.7498	11.3949	11.2056	11.1827
A_51_P155345	0.145235	0.273103	1.2262	up	NM_026885	chr7:13618024-13617889	Chmp2a	Mus musculus charged multivesicular body protein 2A (Chmp2a), mRNA [NM_026885]	GO:0005515|GO:0005737|GO:0016020|GO:0019904|GO:0006810|GO:0015031|GO:0070062|GO:0045184|GO:0005829|GO:0005768	NM_026885	Mm.295670	68953	3685.59	4875.24	12.1312	11.837	5713.14	3024.13	2319.51	4160.3	5439.1	5026.31	12.327	12.1808	11.8857	11.6401	11.938	11.9329
A_66_P100765	0.588192	0.694182	1.09911	up	NM_001286396	chr5:114470971-114471030	Dao	Mus musculus D-amino acid oxidase (Dao), transcript variant 2, mRNA [NM_001286396]	GO:0070178|GO:0048037|GO:0005102|GO:0036088|GO:0005741|GO:0005829|GO:0042416|GO:0071949|GO:0016641|GO:0006562|GO:0016491|GO:0046983|GO:0003884|GO:0055130|GO:0005778|GO:0006551|GO:0055114|GO:0005777	NM_001286396	Mm.20115	13142	22.5364	44.1679	5.03052	4.89419	27.9885	17.6067	22.0139	43.6612	49.4007	39.4418	4.62521	5.12933	5.33703	5.00999	4.96776	4.70482
A_55_P2072453	0.082593	0.198843	2.96013	up	NM_001290273	chr1:186611226-186611167	Marc1	Mus musculus mitochondrial amidoxime reducing component 1 (Marc1), mRNA [NM_001290273]	GO:0008940|GO:0005743|GO:0005741|GO:0003824|GO:0005739|GO:0043546|GO:0016020|GO:0042126|GO:0030170|GO:0016491|GO:0016021|GO:0030151|GO:0055114	NM_001290273	Mm.272457	66112	301.677	196.376	8.57171	7.00605	224.093	165.662	515.277	135.481	176.703	276.945	7.6974	8.24209	9.77564	6.65614	6.81701	7.54498
A_55_P2117721	0.537217	0.651662	1.20806	up	NM_001170935	chr10:79324535-79324476	BC005764	Mus musculus cDNA sequence BC005764 (BC005764), transcript variant 2, mRNA [NM_001170935]	GO:0005515|GO:0008150|GO:0016787|GO:0016020|GO:0016021|GO:0008195|GO:0005575|GO:0003824	NM_001170935	Mm.29678	216152	12.0072	17.2459	3.82217	3.54949	23.9595	6.63752	5.42452	20.7319	12.1401	18.8659	4.3929	3.7282	3.34543	3.95056	3.04996	3.64794
A_51_P250807	0.593946	0.698805	1.14645	up	NM_030176	chr8:125756404-125756345	Spata2l	Mus musculus spermatogenesis associated 2-like (Spata2l), mRNA [NM_030176]	GO:0008150|GO:0003674|GO:0005575	NM_030176	Mm.41459	78779	92.1719	163.517	6.99824	6.80106	108.155	55.4359	112.925	160.017	178.035	152.497	6.61846	6.70992	7.66634	6.89302	6.82815	6.68203
A_55_P2008874	0.00749005	0.0589199	1.87007	up	NM_001003961	chr2:153512991-153513050	Dnmt3b	Mus musculus DNA methyltransferase 3B (Dnmt3b), transcript variant 1, mRNA [NM_001003961]	GO:0005515|GO:0000792|GO:0003886|GO:0006346|GO:0008168|GO:0031503|GO:0010424|GO:0005634|GO:0032259|GO:0046872|GO:0043231|GO:0045322|GO:0005737|GO:0071230|GO:0051718|GO:0090116|GO:0003714|GO:0000122|GO:0003677|GO:0006306|GO:0010628|GO:0005720|GO:0051571|GO:0045666|GO:0051573|GO:0045814|GO:0006349|GO:0046498|GO:0045892|GO:0046499|GO:0000775|GO:0016740	NM_001003961	Mm.89772	13436	55.8148	62.342	6.29997	5.39687	77.1039	51.3819	38.9587	64.2574	61.2828	61.4858	6.13709	6.61183	6.15098	5.57491	5.27467	5.34103
A_55_P2157788	0.417679	0.546305	1.04397	up		chr14:054944007-054943948							3918.59	6188	12.2695	12.2074	5436.55	3480.46	2838.74	6243.99	6288.29	6031.73	12.2555	12.3886	12.1644	12.2477	12.1714	12.2033
A_55_P2156006	0.390456	0.521448	1.21264	up	NM_001030292	chr2:163684551-163684610	Kcnk15	Mus musculus potassium channel, subfamily K, member 15 (Kcnk15), mRNA [NM_001030292]	GO:0008150|GO:0016020|GO:0006810|GO:0005267|GO:0016021|GO:0005575|GO:0006811	NM_001030292	Mm.295337	241769	28.5691	43.0679	5.12292	4.84477	55.2417	15.8185	14.6471	36.2382	53.2664	39.6991	5.6392	4.97111	4.75845	4.74557	5.07361	4.71511
A_55_P1966593	0.0234644	0.0994197	1.81507	up		chr2:032261625-032261566							226.467	261.109	8.34314	7.48311	259.056	211.6	208.746	271.971	243.015	268.342	7.91512	8.57832	8.53597	7.66463	7.283	7.50169
A_55_P2038203	0.134596	0.261621	2.26818	up	NR_027955	chr3:65332963-65332904	4931440P22Rik	Mus musculus RIKEN cDNA 4931440P22 gene (4931440P22Rik), long non-coding RNA [NR_027955]	GO:0008150|GO:0003674|GO:0005575	NR_027955	Mm.475465	71004	23.5424	22.1041	5.07153	3.89	17.4565	29.32	23.8507	27.4654	18.8335	20.0134	3.91868	5.83949	5.45643	4.34587	3.58227	3.74185
A_52_P254782	0.0626711	0.169419	1.60164	up	NM_001170787	chr9:9673903-9673844	Cntn5	Mus musculus contactin 5 (Cntn5), transcript variant 1, mRNA [NM_001170787]	GO:0005737|GO:0016020|GO:0005886|GO:0007605|GO:0031225|GO:0007155	NM_001170787	Mm.490683	244682	13.7668	17.1085	4.16443	3.48487	23.9334	9.4034	7.96359	11.9576	23.7258	15.6421	4.39172	4.21414	3.88742	3.17872	3.91317	3.36273
A_55_P2181176	0.119675	0.24365	1.11517	up	NM_028995	chr4:135019770-135019711	Nipal3	Mus musculus NIPA-like domain containing 3 (Nipal3), mRNA [NM_028995]	GO:0015693|GO:0016020|GO:0015095|GO:0016021	NM_028995	Mm.26548	74552	12.5856	22.7389	4.09245	3.93518	20.1541	8.57235	9.03029	19.1813	26.7977	22.2376	4.13739	4.0806	4.05935	3.83056	4.08347	3.89151
A_52_P516034	0.0393081	0.130506	2.58743	up	NM_011200	chr1:30997727-30997668	Ptp4a1	Mus musculus protein tyrosine phosphatase 4a1 (Ptp4a1), mRNA [NM_011200]	GO:0030335|GO:0005886|GO:0005783|GO:0005634|GO:0007275|GO:0035335|GO:0016791|GO:0005737|GO:0007049|GO:0006470|GO:0016787|GO:0016020|GO:0016311|GO:0009898|GO:0004721|GO:0004727|GO:0005856|GO:0004725|GO:0005768	NM_011200	Mm.491181	19243	1757.52	1144.97	11.0181	9.64654	2618.71	1933.92	719.937	794.091	1410.5	1230.32	11.2156	11.5905	10.2481	9.21682	9.90689	9.81591
A_51_P294555	0.059672	0.164856	1.51619	up	NM_001033632	chr7:148201773-148201714	Ifitm6	Mus musculus interferon induced transmembrane protein 6 (Ifitm6), mRNA [NM_001033632]	GO:0008150|GO:0003674|GO:0016020|GO:0016021|GO:0005575	NM_001033632	Mm.276440	213002	59.2894	78.4975	6.33211	5.73166	90.1599	32.2228	55.4855	82.7802	74.2316	78.4807	6.36355	5.96691	6.66587	5.93073	5.55046	5.7138
A_55_P2006261	0.121409	0.245529	1.48327	up	NM_008469	chr11:99993390-99993331	Krt15	Mus musculus keratin 15 (Krt15), mRNA [NM_008469]	GO:0005882|GO:0005198|GO:0097110|GO:0005634|GO:0070062	NM_008469	Mm.440010	16665	39.2728	50.1771	5.62894	5.06016	71.4086	18.4249	27.9849	41.7195	45.847	62.9649	6.01987	5.19341	5.67355	4.94721	4.85103	5.38225
A_55_P2159573	0.858658	0.903845	1.05101	up	NM_001204931	chr10:79797955-79798014	Reep6	Mus musculus receptor accessory protein 6 (Reep6), transcript variant 2, mRNA [NM_001204931]	GO:0005515|GO:0008150|GO:0016020|GO:0045177|GO:0005634|GO:0016021	NM_001204931	Mm.28147	70335	114.391	234.19	7.34893	7.27715	123.127	83.2781	136.769	182.934	315.733	203.901	6.81607	7.29179	7.93893	7.06673	7.66133	7.10341
A_55_P2001290	0.0228432	0.098204	2.10304	up	NM_009454	chr2:78760395-78760454	Ube2e3	Mus musculus ubiquitin-conjugating enzyme E2E 3 (Ube2e3), mRNA [NM_009454]	GO:0005515|GO:0070534|GO:0005737|GO:0004842|GO:0070979|GO:0016881|GO:0000166|GO:0016874|GO:0005634|GO:0070936|GO:0005524|GO:0040008	NM_009454	Mm.1485	22193	3948.18	3317.65	12.3327	11.2602	4019.76	4426.25	3398.52	2749.19	3579.25	3624.51	11.8168	12.7498	12.4315	11.0356	11.3087	11.4363
A_55_P2005972	0.896787	0.93083	1.01826	up									317.924	623.356	8.79007	8.76396	400.361	230.539	322.871	562.705	700.065	607.3	8.53338	8.68995	9.14686	8.71311	8.84874	8.73004
A_51_P118132	0.008253	0.0609153	1.94511	up	NM_011386	chr3:31021203-31021262	Skil	Mus musculus SKI-like (Skil), transcript variant 1, mRNA [NM_011386]	GO:0005515|GO:0070306|GO:0001669|GO:0003714|GO:0019904|GO:0001825|GO:0046332|GO:0005634|GO:0000122|GO:0070848|GO:0032403|GO:0070208|GO:0070207|GO:0043234|GO:0005737|GO:0007519|GO:0003682|GO:0016605|GO:0007050|GO:0007179|GO:0050772|GO:0045596|GO:0030512|GO:0002260	NM_011386	Mm.15406	20482	3765.7	3371.37	12.2417	11.2818	4498.29	3958.94	2839.86	3450.02	3753.14	2910.93	11.9794	12.5801	12.1656	11.3595	11.3762	11.1099
A_51_P428781	0.493358	0.613491	1.15517	up	NM_001024954	chr8:72393975-72394034	Pbx4	Mus musculus pre B cell leukemia homeobox 4 (Pbx4), mRNA [NM_001024954]	GO:0043565|GO:0001741|GO:0006355|GO:0003700|GO:0006357|GO:0005634|GO:0045893|GO:0003677|GO:0006351	NM_001024954	Mm.210823	80720	11.4265	21.3497	4.03493	3.82682	13.9643	8.60038	11.7147	16.0249	24.981	23.0431	3.59308	4.08585	4.42585	3.55969	3.97788	3.94291
A_51_P111757	0.00336543	0.0433884	1.35837	up	NM_001039126	chr1:93455932-93455991	Asb1	Mus musculus ankyrin repeat and SOCS box-containing 1 (Asb1), transcript variant 1, mRNA [NM_001039126]	GO:0035556|GO:0030539|GO:0003674|GO:0007275|GO:0005575	NM_001039126	Mm.234152	65247	94.762	139.473	7.01035	6.56847	148.968	69.3035	66.0149	133.08	151.044	134.297	7.10408	7.0229	6.90406	6.62643	6.58864	6.49036
A_51_P181538	0.00221383	0.0374018	1.45992	up	NM_145125	chr16:96214419-96214360	Brwd1	Mus musculus bromodomain and WD repeat domain containing 1 (Brwd1), transcript variant 1, mRNA [NM_145125]	GO:0005515|GO:0006355|GO:0005737|GO:0006357|GO:0008360|GO:0007010|GO:0005634|GO:0006351	NM_145125	Mm.240871	93871	307.625	423.737	8.73064	8.18475	426.989	237.57	258.317	397.033	474.796	399.381	8.62505	8.72595	8.84091	8.19425	8.26128	8.09871
A_55_P1975210	0.051668	0.152083	1.36213	up	NM_001033389	chr2:31472017-31472076	Fubp3	Mus musculus far upstream element (FUSE) binding protein 3 (Fubp3), transcript variant 1, mRNA [NM_001033389]	GO:0010628|GO:0005737|GO:0003697|GO:0045944|GO:0005634|GO:0045893|GO:0006351	NM_001033389	Mm.207261	320267	506.03	665.534	9.31161	8.86575	866.488	336.317	315.284	652.828	683.862	659.911	9.62565	9.20147	9.10771	8.92558	8.81766	8.854
A_55_P1998825	0.815831	0.871732	1.03555	up	NM_011292	chr5:65779672-65779613	Rpl9	Mus musculus ribosomal protein L9 (Rpl9), mRNA [NM_011292]	GO:0005622|GO:0005737|GO:0003735|GO:0030529|GO:0005730|GO:0005840|GO:0005634|GO:0022625|GO:0019843|GO:0006412	NM_011292	Mm.300271	20005	40213.9	61763.7	15.5356	15.4852	70378	28917.5	21346.2	59251.6	64501.9	61537.6	15.8353	15.6115	15.16	15.4207	15.5588	15.476
A_55_P2002469	0.338176	0.472962	1.10119	up	AK020839	chr18:24867651-24867592		predicted gene 9955 [Source:MGI Symbol;Acc:MGI:3642397] [ENSMUST00000067987]			Mm.361250		14.5989	26.4904	4.29064	4.15158	24.0489	9.63639	10.1113	24.6453	31.8844	22.9415	4.39848	4.25169	4.22176	4.188	4.33127	3.93549
A_55_P2051039	0.0182124	0.0880694	1.98486	up	NM_001099346	chr11:99481395-99481336	Gm11937	Mus musculus predicted gene 11937 (Gm11937), mRNA [NM_001099346]	GO:0008150|GO:0003674|GO:0005575	NM_001099346	Mm.465212	100041488	1260.03	1185.65	10.7363	9.74731	1312.73	1259.31	1208.06	1152.8	1204.11	1200.04	10.2276	10.9819	10.9995	9.77886	9.68179	9.78129
A_51_P493037	0.187564	0.319504	1.10549	up	NM_018831	chr19:56605787-56605728	Dclre1a	Mus musculus DNA cross-link repair 1A, PSO2 homolog (S. cerevisiae) (Dclre1a), mRNA [NM_018831]	GO:0007067|GO:0007049|GO:0006281|GO:0016787|GO:0005634|GO:0006289|GO:0006974|GO:0051301	NM_018831	Mm.2805	55947	176.962	323.114	7.92707	7.78239	264.534	133.373	132.978	270.681	387.161	311.5	7.94585	7.93985	7.89552	7.65647	7.95611	7.73459
A_51_P464576	0.132762	0.259417	1.38755	up	NM_008943	chr12:85075327-85075386	Psen1	Mus musculus presenilin 1 (Psen1), mRNA [NM_008943]	GO:0005515|GO:0030018|GO:0031594|GO:0007220|GO:0008013|GO:0001756|GO:0009790|GO:0015031|GO:0009791|GO:0005765|GO:0007507|GO:0005622|GO:0001947|GO:0015813|GO:0016337|GO:0021795|GO:0007219|GO:0016485|GO:0007175|GO:0007176|GO:0007611|GO:0006508|GO:0007613|GO:0006509|GO:0005938|GO:0006839|GO:0006979|GO:0005791|GO:0031965|GO:0005262|GO:0005813|GO:0005794|GO:0009986|GO:0001708|GO:0032469|GO:0000122|GO:…	NM_008943	Mm.998	19164	1424.58	1900.34	10.9077	10.4351	1522.37	1484.72	1266.65	1860.81	2152	1688.2	10.4373	11.2237	11.062	10.4713	10.5411	10.2931
A_55_P2152872	0.00255457	0.0393793	1.60505	up	NM_054071	chr5:109135855-109135914	Fgfrl1	Mus musculus fibroblast growth factor receptor-like 1 (Fgfrl1), transcript variant 1, mRNA [NM_054071]	GO:0005007|GO:0008285|GO:0005886|GO:0017134|GO:0060412|GO:0018108|GO:0003179|GO:0001501|GO:0016020|GO:0005887|GO:0008543|GO:0040037|GO:0060539|GO:0001571|GO:0016021|GO:0008201|GO:0007166	NM_054071	Mm.35691	116701	190.328	243.261	8.05767	7.37506	260.446	143.921	166.617	209.246	258.77	261.768	7.92174	8.03721	8.21406	7.27497	7.38298	7.46722
A_55_P2136672	0.00208732	0.0369472	1.63316	up	NM_181266	chr2:149942992-149942933	Zfp120	Mus musculus zinc finger protein 120 (Zfp120), transcript variant 1, mRNA [NM_181266]	GO:0005622|GO:0008150|GO:0006355|GO:0005634|GO:0003676|GO:0003677|GO:0046872|GO:0006351	NM_181266	Mm.485851	104348	279.029	339.478	8.56741	7.85974	414.933	190.051	232.103	297.229	348.269	372.936	8.58413	8.43098	8.68712	7.78811	7.79855	7.99256
A_55_P2130109	0.973133	0.982213	1.00725	up	NM_008708	chr2:3243582-3243641	Nmt2	Mus musculus N-myristoyltransferase 2 (Nmt2), transcript variant 1, mRNA [NM_008708]	GO:0005737|GO:0016746|GO:0005794|GO:0005886|GO:0004379|GO:0018008|GO:0016740|GO:0006499	NM_008708	Mm.65021	18108	21.7778	40.2083	4.76755	4.75712	40.2437	14.8346	10.2552	40.6704	44.007	35.9474	5.17302	4.88499	4.24463	4.90778	4.78653	4.57705
A_52_P682382	0.0770171	0.191071	2.89209	up	NM_009127	chr19:44469446-44469387	Scd1	Mus musculus stearoyl-Coenzyme A desaturase 1 (Scd1), mRNA [NM_009127]	GO:0006629|GO:0005506|GO:0050830|GO:0005783|GO:0004768|GO:0010873|GO:0043231|GO:0050872|GO:0016020|GO:0050873|GO:0006631|GO:0016491|GO:0006633|GO:0016021|GO:0034435|GO:0044130|GO:0016717|GO:0055114	NM_009127	Mm.267377	20249	221.499	191.599	8.30726	6.77515	264.077	192.005	208.415	134.802	86.6623	353.334	7.94308	8.44579	8.53292	6.64589	5.77099	7.90857
A_51_P268843	7.56033e-05	0.0173213	2.96564	up	NM_028544	chr7:52894134-52894193	Rasip1	Mus musculus Ras interacting protein 1 (Rasip1), mRNA [NM_028544]	GO:0005515|GO:0007165|GO:0048471|GO:0008284|GO:0005737|GO:0005794|GO:0010507|GO:0048754|GO:0001525|GO:0032319|GO:0017016|GO:0001570	NM_028544	Mm.181396	69903	103.374	69.419	7.11989	5.55155	166.552	72.1832	71.3878	63.7805	69.4701	75.0064	7.26498	7.08386	7.01083	5.5639	5.44908	5.64166
A_55_P2179676	0.667767	0.758839	1.25038	up	NM_029269	chr1:90322944-90323003	Spp2	Mus musculus secreted phosphoprotein 2 (Spp2), mRNA [NM_029269]	GO:0043234|GO:0003674|GO:0006461|GO:0046849|GO:0005576	NM_029269	Mm.173058	75396	32.4591	33.8877	4.83169	4.50933	78.5648	8.79607	10.0165	39.5681	28.5553	33.5396	6.16559	4.12168	4.20781	4.86946	4.17475	4.48379
A_52_P657800	0.264777	0.400673	1.27247	up	NM_001081091	chr2:125389395-125389336	Cep152	Mus musculus centrosomal protein 152 (Cep152), mRNA [NM_001081091]	GO:0005515|GO:0051298|GO:0005813|GO:0005737|GO:0019901|GO:0007099|GO:0030030|GO:0005634|GO:0005856	NM_001081091	Mm.330545	99100	184.693	302.976	8.04704	7.69941	203.972	197.343	152.764	265.403	339.23	304.294	7.56548	8.48165	8.09398	7.63334	7.76654	7.69835
A_51_P403243	0.0908966	0.209024	1.90766	up	NM_029779	chr16:17141203-17141144	Ccdc116	Mus musculus coiled-coil domain containing 116 (Ccdc116), transcript variant 2, mRNA [NM_029779]	GO:0008150|GO:0003674|GO:0005575	NM_029779	Mm.475763	76872	479.366	482.148	9.25346	8.32166	697.245	506.199	234.653	291.074	542.969	612.4	9.31578	9.74117	8.70344	7.75691	8.46793	8.74014
A_52_P404895	0.052052	0.152734	1.5831	up	NM_175285	chr2:120828265-120828324	Tmem62	Mus musculus transmembrane protein 62 (Tmem62), mRNA [NM_175285]	GO:0008150|GO:0003674|GO:0016020|GO:0016021|GO:0005575	NM_175285	Mm.315212	96957	111.91	138.625	7.1893	6.52655	190.227	81.813	63.6912	102.496	176.821	136.559	7.45204	7.26311	6.85276	6.24628	6.81862	6.51476
A_52_P552879	0.0272863	0.107297	1.46956	up	NM_001025103	chr7:148652239-148652298	Efcab4a	Mus musculus EF-hand calcium binding domain 4A (Efcab4a), mRNA [NM_001025103]	GO:0005515|GO:0005737|GO:0002115|GO:0005509|GO:2001256|GO:0034613	NM_001025103	Mm.386851	213573	182.452	242.001	7.92549	7.37011	291.428	104.68	151.247	218.691	260.727	246.583	8.09524	7.60038	8.08086	7.33983	7.39224	7.37826
A_52_P89567	0.0230925	0.0985863	2.91037	up	NM_007483	chr12:8504810-8504751	Rhob	Mus musculus ras homolog gene family, member B (Rhob), mRNA [NM_007483]	GO:0005515|GO:0070301|GO:0005886|GO:0007264|GO:0006927|GO:0005634|GO:0015031|GO:0032154|GO:0030154|GO:0005829|GO:0005622|GO:0000910|GO:0000166|GO:0006810|GO:0007155|GO:0070062|GO:0043065|GO:0008333|GO:0006915|GO:0007275|GO:0001525|GO:0045786|GO:0005525|GO:0071479|GO:0045766|GO:0016020|GO:0019003|GO:0010008|GO:0005768	NM_007483	Mm.687	11852	482.154	288.842	9.17183	7.63062	750.009	515.106	181.348	252.612	312.129	301.786	9.4146	9.76216	8.33872	7.55943	7.6483	7.68414
A_55_P2039105	0.619881	0.719549	1.0496	up	NM_001083921	chr2:152142134-152142075	Rbck1	Mus musculus RanBP-type and C3HC4-type zinc finger containing 1 (Rbck1), transcript variant 1, mRNA [NM_001083921]	GO:0000209|GO:0005515|GO:0050852|GO:0042346|GO:0043130|GO:2001238|GO:0004842|GO:0043065|GO:0016874|GO:0071797|GO:0032088|GO:0097039|GO:0046872|GO:0051092|GO:0003690|GO:0045944|GO:0005080|GO:0008270|GO:0043161|GO:0043123|GO:0060546	NM_001083921	Mm.182145	24105	2435.29	4054.61	11.6381	11.5682	2977.98	2273.93	2053.96	4152.64	4095.7	3915.5	11.3921	11.7955	11.7265	11.6382	11.5093	11.5572
A_52_P174915	0.798991	0.859511	1.08784	up	NM_010288	chr10:56109814-56109873	Gja1	Mus musculus gap junction protein, alpha 1 (Gja1), mRNA [NM_010288]	GO:0005515|GO:0060044|GO:0046850|GO:0030054|GO:0008016|GO:0060307|GO:0010232|GO:0051259|GO:0005764|GO:0007512|GO:0060371|GO:0001947|GO:0007507|GO:0051924|GO:0043123|GO:0003347|GO:0030500|GO:0005794|GO:0019904|GO:0048487|GO:0030165|GO:0001701|GO:0045844|GO:0045216|GO:0001649|GO:0005921|GO:0045121|GO:0002070|GO:0005922|GO:0010652|GO:0042733|GO:0005882|GO:0045732|GO:0017124|GO:0008285|GO:0005886|GO:…	NM_010288	Mm.378921	14609	296.809	425.517	8.30621	8.18475	632.134	132.71	125.582	344.463	498.043	434.046	9.17438	7.93416	7.81009	7.9999	8.33094	8.22341
A_55_P2176320	0.530105	0.645542	1.16609	up	NM_025973	chr17:47869392-47869451	Pgc	Mus musculus progastricsin (pepsinogen C) (Pgc), mRNA [NM_025973]	GO:0016787|GO:0007586|GO:0006508|GO:0008233|GO:0005576|GO:0004190	NM_025973	Mm.22957	109820	139.951	216.874	7.40655	7.18488	268.691	73.1501	78.0131	168.087	277.033	205.503	7.97234	7.10272	7.14461	6.95954	7.4824	7.1127
A_51_P118763	0.00645759	0.0556503	2.08252	up	NM_026375	chr1:181676542-181676483	Ahctf1	Mus musculus AT hook containing transcription factor 1 (Ahctf1), mRNA [NM_026375]	GO:0003700|GO:0005634|GO:0015031|GO:0051292|GO:0016363|GO:0000910|GO:0005737|GO:0005643|GO:0006810|GO:0000785|GO:0070062|GO:0030097|GO:0006355|GO:0031965|GO:0005694|GO:0007275|GO:0003677|GO:0006351|GO:0007049|GO:0007067|GO:0031080|GO:0000777|GO:0000776|GO:0051028|GO:0045893|GO:0000775|GO:0051301	NM_026375	Mm.128165	226747	988.814	898.986	10.3767	9.3184	1147.89	1045.64	772.915	801.761	973.702	921.495	10.0388	10.725	10.3664	9.23115	9.35092	9.37313
A_51_P107782	0.0609187	0.166683	1.26045	up	NM_027534	chr1:108620698-108620639	Kdsr	Mus musculus 3-ketodihydrosphingosine reductase (Kdsr), mRNA [NM_027534]	GO:0006665|GO:0006629|GO:0047560|GO:0006666|GO:0016020|GO:0005783|GO:0030148|GO:0008152|GO:0016491|GO:0016021|GO:0055114	NM_027534	Mm.458911	70750	555.072	809.509	9.49683	9.16289	845.57	346.976	472.672	754.578	877.754	796.196	9.58593	9.24425	9.6603	9.14135	9.19453	9.15279
A_55_P2055854	0.00376375	0.0452792	3.04045	up	NM_011144	chr15:85632110-85632169	Ppara	Mus musculus peroxisome proliferator activated receptor alpha (Ppara), transcript variant 1, mRNA [NM_011144]	GO:0010468|GO:0005515|GO:0001190|GO:0003700|GO:0006366|GO:0003707|GO:0032403|GO:0004879|GO:0031624|GO:0001103|GO:0032868|GO:0010745|GO:0046982|GO:0019902|GO:0019904|GO:0046321|GO:0000122|GO:0019217|GO:0032922|GO:0008544|GO:0042060|GO:0042157|GO:0008270|GO:0045893|GO:0006629|GO:0032091|GO:0051525|GO:0032099|GO:0010871|GO:0005634|GO:0045776|GO:2000678|GO:0046872|GO:0008289|GO:0072366|GO:0072363|GO:…	NM_011144	Mm.212789	19013	1677.67	995.288	11.0607	9.45646	2425.97	1019.65	1587.39	776.925	1012.73	1196.2	11.1143	10.6897	11.3782	9.18034	9.41277	9.77628
A_55_P1965725	0.150105	0.279369	1.25285	up	NM_008084	chr6:125113288-125113229	Gapdh	Mus musculus glyceraldehyde-3-phosphate dehydrogenase (Gapdh), transcript variant 2, mRNA [NM_008084]	GO:0008017|GO:0017148|GO:0005886|GO:0006094|GO:0005634|GO:0051402|GO:0006096|GO:0005829|GO:0042802|GO:0005739|GO:0005737|GO:0015630|GO:0060359|GO:0070062|GO:0005811|GO:0035605|GO:0005975|GO:0050821|GO:0006915|GO:0000226|GO:0007275|GO:0004365|GO:0018119|GO:0035606|GO:0071346|GO:0030529|GO:0055114	NM_008084	Mm.343110	14433	5743.24	7880.03	12.8651	12.5399	6856.89	4908.07	5464.75	7089.19	9315.28	7235.62	12.583	12.8956	13.1168	12.4272	12.7339	12.4587
A_55_P2013591	0.048253	0.146155	1.24956	up		chr1:055438089-055438030							376.44	588.694	9.00016	8.67874	534.535	293.466	301.32	623.481	547.359	595.242	8.9362	9.01593	9.04836	8.85999	8.48207	8.69416
A_51_P353914	0.0473139	0.144601	1.43784	up	NM_008319	chr9:20843419-20843478	Icam5	Mus musculus intercellular adhesion molecule 5, telencephalin (Icam5), mRNA [NM_008319]	GO:0006909|GO:0005515|GO:0016337|GO:0016020|GO:0005886|GO:0016021|GO:0007155	NM_008319	Mm.4629	15898	171.544	247.996	7.93577	7.41186	206.564	143.232	164.835	232.865	255.534	255.59	7.58128	8.03031	8.19572	7.43889	7.36471	7.43199
A_55_P2322169	0.551828	0.663952	1.13847	up	NM_018818	chrX:110155723-110155664	Chm	Mus musculus choroidermia (Chm), mRNA [NM_018818]	GO:0017137|GO:0005737|GO:0018344|GO:0005968|GO:0001568|GO:0006612|GO:0004663|GO:0006886|GO:0005829|GO:0005096	NM_018818	Mm.257316	12662	91.1577	167.447	6.9878	6.80071	122.362	94.1822	56.929	121.892	206.985	173.464	6.80573	7.45893	6.69874	6.49234	7.04878	6.86101
A_55_P2157992	0.13801	0.26506	1.30282	up		chr2:146580744-146580685							18275.5	24440.1	14.5584	14.1767	21531.5	16596.5	16698.4	25496.2	26568.4	21255.6	14.1788	14.7047	14.7916	14.2476	14.2596	14.023
A_55_P1954212	0.724776	0.804155	1.08683	up	NM_026943	chr7:19737898-19737957	Snrpd2	Mus musculus small nuclear ribonucleoprotein D2 (Snrpd2), mRNA [NM_026943]	GO:0006397|GO:0008380|GO:0005634|GO:0071013|GO:0000387|GO:0034709|GO:0005829|GO:0005737|GO:0019013|GO:0030529|GO:0030532|GO:0034715|GO:0005681|GO:0005687|GO:0019012|GO:0034719|GO:0005685|GO:0005689|GO:0070062	NM_026943	Mm.29135	107686	3783.67	5971.17	12.2717	12.1516	3598.34	4229.56	3523.12	6318.63	5890.45	5704.43	11.6574	12.6804	12.4774	12.263	12.0701	12.1217
A_51_P430903	0.928662	0.952783	1.00812	up	XM_006509818	chr8:73649716-73649775	Gm7827	PREDICTED: Mus musculus predicted gene 7827 (Gm7827), transcript variant X2, mRNA [XM_006509818]		XM_006509818	Mm.489022	665858	11.604	22.4149	3.93697	3.9253	19.6064	8.16078	7.04468	20.5799	25.0759	21.589	4.09275	4.00913	3.70902	3.93914	3.98267	3.85408
A_55_P1993636	0.00561889	0.0528477	1.90508	up	NM_019773	chrX:162895736-162895677	Rab9	Mus musculus RAB9, member RAS oncogene family (Rab9), mRNA [NM_019773]	GO:0005886|GO:0005770|GO:0007264|GO:0003924|GO:0031410|GO:0005525|GO:0015031|GO:0005764|GO:0045335|GO:0006184|GO:0045921|GO:0000166|GO:0016020|GO:0006810|GO:0019003|GO:0070062|GO:0005768	NM_019773	Mm.25306	56382	1254.6	1213.55	10.7039	9.77405	1606.49	959.989	1197.31	1252.66	1331.93	1056.06	10.5205	10.6055	10.9857	9.905	9.82728	9.58986
A_55_P1953683	0.704508	0.788689	1.08589	up	NM_010945	chr4:6323472-6323413	Nsmaf	Mus musculus neutral sphingomyelinase (N-SMase) activation associated factor (Nsmaf), mRNA [NM_010945]	GO:0016230|GO:0043065|GO:0005123|GO:0043085	NM_010945	Mm.3059	18201	846.497	1457.12	10.1626	10.0437	966.265	623.044	950.182	1239.95	1445.32	1686.08	9.79158	10.0234	10.6727	9.89165	9.94838	10.2911
A_51_P117581	0.00542908	0.0520505	1.7221	up	NM_022021	chr18:12103931-12103990	Cables1	Mus musculus CDK5 and Abl enzyme substrate 1 (Cables1), transcript variant 2, mRNA [NM_022021]	GO:0005515|GO:0007049|GO:0005737|GO:0000082|GO:0051726|GO:0016538|GO:0005634|GO:0042995|GO:0051302|GO:0051301|GO:0007399	NM_022021	Mm.40717	63955	627.187	700.273	9.71225	8.92808	851.351	539.178	491.031	720.017	793.607	587.196	9.5967	9.8252	9.71484	9.0728	9.03698	8.67446
A_51_P211506	0.51702	0.634791	1.10872	up	NM_146071	chr16:32786202-32786143	Muc20	Mus musculus mucin 20 (Muc20), transcript variant 2, mRNA [NM_146071]	GO:0005515|GO:0000187|GO:0048012|GO:0009925|GO:0016020|GO:0005886|GO:0051260|GO:0005576|GO:0042995	NM_146071	Mm.153301	224116	83.3311	143.496	6.76232	6.61342	142.523	44.0993	63.3706	149.679	141.912	138.899	7.03864	6.40412	6.84422	6.79913	6.49874	6.5424
A_55_P1994020	0.0886717	0.2063	2.15714	up	NM_001205369	chr2:121761338-121761397	Casc4	Mus musculus cancer susceptibility candidate 4 (Casc4), transcript variant 3, mRNA [NM_001205369]	GO:0008150|GO:0003674|GO:0005794|GO:0016020|GO:0016021	NM_001205369	Mm.292109	319996	774.097	527.856	9.61844	8.50932	1684.51	314.125	323.655	465.22	527.728	590.621	10.5934	9.11263	9.14927	8.42434	8.42092	8.68271
A_55_P2027930	0.00150533	0.0338615	2.77618	up	NM_023739	chr4:40971847-40971906	Nfx1	Mus musculus nuclear transcription factor, X-box binding 1 (Nfx1), transcript variant 1, mRNA [NM_023739]	GO:0005515|GO:0006355|GO:0003700|GO:0016874|GO:0005634|GO:0000122|GO:0005575|GO:0003676|GO:0003677|GO:0006351|GO:0046872|GO:0045347|GO:0008270	NM_023739	Mm.247456	74164	164.66	126.115	7.86719	6.39409	214.45	142.684	136.846	94.6063	157.925	125.814	7.63531	8.02516	7.94109	6.13423	6.65091	6.39712
A_51_P306017	0.0212692	0.0944612	1.90815	up	NM_007865	chr17:15504682-15504623	Dll1	Mus musculus delta-like 1 (Drosophila) (Dll1), mRNA [NM_007865]	GO:0005515|GO:0007368|GO:0007386|GO:0005886|GO:0001757|GO:0032693|GO:0001756|GO:0007267|GO:0005112|GO:0070986|GO:0030154|GO:0001947|GO:0061314|GO:0050767|GO:0007154|GO:0009912|GO:0007219|GO:0045638|GO:0045944|GO:0009887|GO:0042475|GO:0045747|GO:0048839|GO:0042472|GO:0042491|GO:0005509|GO:0007275|GO:0031410|GO:0001701|GO:0007399|GO:0045608|GO:0045665|GO:0016020|GO:0045596|GO:0016021	NM_007865	Mm.4875	13388	1935.4	1706.1	11.2014	10.2693	3132.4	1647.78	1026.02	1339.26	1897.44	1881.59	11.4621	11.3658	10.7764	10.0033	10.3578	10.4467
A_52_P418489	0.00214123	0.0370654	2.85971	up	NM_023476	chr4:129843103-129843044	Tinagl1	Mus musculus tubulointerstitial nephritis antigen-like 1 (Tinagl1), transcript variant 1, mRNA [NM_023476]	GO:0031012|GO:0006955|GO:0005737|GO:0043236|GO:0006508|GO:0030247|GO:0005576|GO:0008234|GO:0070062|GO:0005044	NM_023476	Mm.15801	94242	479.91	330.98	9.32624	7.81037	646.066	478.364	315.301	326.218	388.38	278.343	9.20486	9.66574	9.10811	7.91743	7.96068	7.553
A_55_P2040161	0.0068815	0.0572472	1.2557	up	NM_025924	chr8:13798289-13798348	Upf3a	Mus musculus UPF3 regulator of nonsense transcripts homolog A (yeast) (Upf3a), mRNA [NM_025924]	GO:0006986|GO:0005737|GO:0005886|GO:0045727|GO:0005634|GO:0003729|GO:0035145	NM_025924	Mm.44858	67031	212.558	342.934	8.20355	7.87506	306.172	168.253	163.25	324.682	385.538	318.584	8.16548	8.26268	8.18247	7.91096	7.95029	7.76393
A_51_P355151	0.000960085	0.0305179	2.24181	up	NM_028420	chr16:20619400-20619341	Camk2n2	Mus musculus calcium/calmodulin-dependent protein kinase II inhibitor 2 (Camk2n2), mRNA [NM_028420]	GO:0016310|GO:0005737|GO:0019901|GO:0016301|GO:0008427|GO:0004860|GO:0005634|GO:0006469|GO:0005575|GO:0016740	NM_028420	Mm.425977	73047	147.886	133.427	7.66355	6.49889	223.218	113.557	106.884	145.238	130.895	124.147	7.68935	7.71581	7.58551	6.75447	6.3707	6.3715
A_51_P498403	0.299794	0.434628	1.28046	up	NM_028065	chr17:46872880-46872821	Cnpy3	Mus musculus canopy 3 homolog (zebrafish) (Cnpy3), mRNA [NM_028065]	GO:0005783|GO:0045087|GO:0005102|GO:0002376	NM_028065	Mm.240325	72029	346.366	550.677	8.93609	8.57943	361.445	358.015	319.636	603.252	552.98	495.798	8.39534	9.28435	9.12857	8.81766	8.49878	8.42183
A_51_P460643	0.337738	0.472632	2.20703	up	NM_001079869	chr11:96207114-96207173	Hoxb3	Mus musculus homeobox B3 (Hoxb3), transcript variant 1, mRNA [NM_001079869]	GO:0006355|GO:0003700|GO:0051216|GO:0021546|GO:0060216|GO:0048704|GO:0005634|GO:0007275|GO:0000122|GO:0030878|GO:0009952|GO:0000979|GO:0003677|GO:0006351|GO:0043565|GO:0050767|GO:0021615|GO:0002244|GO:0060324	NM_001079869	Mm.342481	15410	476.648	299.872	8.53562	7.39352	1191.93	113.864	124.147	554.468	122.086	223.063	10.0921	7.7202	7.79457	8.68731	6.26533	7.22792
A_51_P233101	0.603574	0.706561	1.13039	up	NM_008520	chr19:5758289-5758346	Ltbp3	Mus musculus latent transforming growth factor beta binding protein 3 (Ltbp3), mRNA [NM_008520]	GO:0050431|GO:2000741|GO:0005509|GO:0005578|GO:0005576|GO:0030502|GO:0031012|GO:0060430|GO:0001501|GO:0019838|GO:0046849|GO:0045780|GO:0060349|GO:0007179|GO:0032331|GO:0070062	NM_008520	Mm.182396	16998	176.37	327.676	7.98221	7.80539	194.156	147.216	187.74	365.755	278.986	338.286	7.48538	8.07297	8.38829	8.07443	7.49257	7.84916
A_55_P2002472	0.0150352	0.0800145	1.57703	up	NM_001081382	chr6:47974284-47974225	Zfp777	Mus musculus zinc finger protein 777 (Zfp777), mRNA [NM_001081382]	GO:0008150|GO:0003674|GO:0005575|GO:0046872	NM_001081382	Mm.381553	72306	665.726	771.28	9.74263	9.08542	1034.73	533.071	429.375	835.17	716.9	761.77	9.89165	9.80988	9.52637	9.29171	8.88751	9.07705
A_55_P2322620	0.89649	0.930693	1.01253	up	AK046125	chr12:58600733-58600792		Mus musculus adult male corpora quadrigemina cDNA, RIKEN full-length enriched library, clone:B230343F10 product:unclassifiable, full insert sequence. [AK046125]			Mm.487143		13.5125	27.9645	4.26463	4.24666	18.574	10.2776	11.6861	26.4035	30.1851	27.3051	4.01461	4.35661	4.42266	4.29259	4.25359	4.19379
A_51_P418016	0.19014	0.32212	1.29603	up	NM_172839	chr19:40922847-40922906	Ccnj	Mus musculus cyclin J (Ccnj), mRNA [NM_172839]	GO:0008150|GO:0003674|GO:0005634|GO:0005575	NM_172839	Mm.309	240665	58.3581	87.2627	6.25123	5.87713	99.292	44.2672	31.515	83.2143	78.9218	99.6519	6.49728	6.40741	5.849	5.93945	5.6392	6.05274
A_52_P681557	0.0689205	0.179093	2.18012	up	XM_006543734	chr3:23703462-23703403	Naaladl2	PREDICTED: Mus musculus N-acetylated alpha-linked acidic dipeptidase-like 2 (Naaladl2), transcript variant X1, mRNA [XM_006543734]	GO:0008150|GO:0003674|GO:0005575	XM_006543734	Mm.448351	635702	90.762	68.4338	6.63082	5.50641	193.248	36.839	42.1995	50.9666	71.1233	83.2116	7.47929	6.15018	6.26299	5.23795	5.48459	5.79668
A_52_P375876	0.0785472	0.193009	1.34611	up	NM_007478	chr15:98568177-98568118	Arf3	Mus musculus ADP-ribosylation factor 3 (Arf3), mRNA [NM_007478]	GO:0005622|GO:0005737|GO:0005794|GO:0000166|GO:0007264|GO:0006810|GO:0016192|GO:0015031|GO:0005525|GO:0070062	NM_007478	Mm.221298	11842	4168.71	4947.42	12.3006	11.8718	6662.2	2827.36	3016.56	5268.42	4381.4	5192.44	12.5496	12.0985	12.2538	12.0047	11.6206	11.9902
A_55_P2415387	0.924019	0.949611	1.02151	up	NM_026668	chr3:30571162-30571221	Lrriq4	Mus musculus leucine-rich repeats and IQ motif containing 4 (Lrriq4), transcript variant 1, mRNA [NM_026668]	GO:0008150|GO:0003674|GO:0005575	NM_026668	Mm.389425	68307	14.8896	25.4574	4.14469	4.11399	29.3348	6.66997	8.6641	26.1103	24.1817	26.0802	4.6953	3.73569	4.0031	4.27727	3.93682	4.12789
A_51_P291501	0.00318093	0.0426742	9.51613	up	NM_001081062	chr13:113780810-113780869	Ccno	Mus musculus cyclin O (Ccno), mRNA [NM_001081062]	GO:0004844|GO:0007049|GO:0019901|GO:0006284|GO:0051726|GO:0005654|GO:0005634|GO:0000079|GO:0051301	NM_001081062	Mm.25457	218630	144.741	28.3439	7.51959	4.26921	183.507	193.499	57.2172	28.6467	28.9487	27.4362	7.39655	8.45524	6.70697	4.40864	4.19634	4.20265
A_52_P535907	0.170364	0.30095	1.3015	up	NM_145943	chr1:182797490-182797549	Sde2	Mus musculus SDE2 telomere maintenance homolog (S. pombe) (Sde2), mRNA [NM_145943]	GO:0008150|GO:0003674|GO:0005575	NM_145943	Mm.272625	208768	341.473	475.409	8.7382	8.35803	596.143	249.293	178.981	445.494	522.013	458.719	9.09692	8.79668	8.32101	8.36237	8.40586	8.30588
A_66_P108468	0.31466	0.449716	1.46006	up	NM_001206684	chr14:37915426-37915367	2610528A11Rik	Mus musculus RIKEN cDNA 2610528A11 gene (2610528A11Rik), mRNA [NM_001206684]	GO:0008150|GO:0003674|GO:0005575	NM_001206684	Mm.271619	70045	59.262	90.3284	6.42395	5.87792	54.4475	67.7459	55.5927	65.6031	128.094	77.2878	5.61626	6.98677	6.66881	5.60471	6.34195	5.6871
A_55_P2058671	0.377861	0.510021	1.07345	up	NM_001015039	chr5:34537649-34537590	Zfyve28	Mus musculus zinc finger, FYVE domain containing 28 (Zfyve28), mRNA [NM_001015039]	GO:0005737|GO:0016020|GO:0031901|GO:0007175|GO:0042059|GO:0032266|GO:0046872|GO:0005829|GO:0005768	NM_001015039	Mm.113388	231125	39.4541	77.2978	5.80605	5.7038	55.4916	32.5834	30.2874	68.0081	82.4728	81.4124	5.64428	5.98137	5.79249	5.64945	5.69648	5.76546
A_51_P275123	0.114211	0.237137	1.24772	up	NM_177698	chr8:70213168-70213109	Psd3	Mus musculus pleckstrin and Sec7 domain containing 3 (Psd3), transcript variant 2, mRNA [NM_177698]	GO:0005622|GO:0005085|GO:0005086|GO:0030054|GO:0016020|GO:0005886|GO:0045211|GO:0030182|GO:0045202|GO:0032012|GO:0032011|GO:0043087	NM_177698	Mm.32525	234353	332.483	537.013	8.83981	8.52051	460.859	267.533	269.056	410.167	646.599	554.273	8.72574	8.89318	8.9005	8.23919	8.74014	8.5822
A_51_P467668	0.000301486	0.0239462	2.52449	up	NM_019987	chr9:78014734-78014793	Ick	Mus musculus intestinal cell kinase (Ick), transcript variant 2, mRNA [NM_019987]	GO:0000287|GO:0007275|GO:0005524|GO:0046872|GO:0035556|GO:0007165|GO:0016310|GO:0005737|GO:0004672|GO:0000166|GO:0004674|GO:0016301|GO:0006468|GO:0016740|GO:0016772|GO:0004693	NM_019987	Mm.288719	56542	545.148	404.921	9.45526	8.11927	876.667	395.831	362.947	405.691	422.303	386.769	9.64588	9.41615	9.30375	8.22431	8.0805	8.053
A_55_P2056739	0.95247	0.96874	1.01876	up	NM_028266	chr4:129776333-129776392	Col16a1	Mus musculus collagen, type XVI, alpha 1 (Col16a1), mRNA [NM_028266]	GO:0005581|GO:0005178|GO:0071230|GO:0005578|GO:0005576|GO:0007155	NM_028266	Mm.41860	107581	431.415	653.654	8.86271	8.8359	904.522	207.768	181.954	668.585	688.494	603.883	9.68718	8.55819	8.34275	8.96146	8.82577	8.72046
A_51_P229990	0.00161532	0.0344776	31.9571	up	NM_029494	chr7:99985127-99985186	Rab30	Mus musculus RAB30, member RAS oncogene family (Rab30), mRNA [NM_029494]	GO:0005802|GO:0005801|GO:0005737|GO:0005794|GO:0016020|GO:0000166|GO:0007264|GO:0031985|GO:0007030|GO:0015031|GO:0005525	NM_029494	Mm.389966	75985	1754.16	124.969	11.1697	6.17163	1641.23	2244.77	1376.46	47.9915	207.59	119.324	10.55	11.777	11.182	5.14795	7.055	6.31193
A_52_P819011	0.869411	0.911582	1.03747	up	NM_007619	chr9:43958183-43958124	Cbl	Mus musculus Casitas B-lineage lymphoma (Cbl), mRNA [NM_007619]	GO:0005515|GO:0043066|GO:0017124|GO:0004842|GO:0005886|GO:0023051|GO:0016874|GO:0005509|GO:0005634|GO:0014068|GO:0046872|GO:0016600|GO:0005737|GO:0046875|GO:0016020|GO:0001784|GO:0008270|GO:0004871|GO:0007166	NM_007619	Mm.266871	12402	315.682	623.271	8.74464	8.69158	461.932	252.213	232.9	387.01	880.239	602.563	8.72867	8.81309	8.69216	8.15876	9.19949	8.71647
A_51_P390715	0.285536	0.421133	1.70579	up	NM_011577	chr7:26489877-26489936	Tgfb1	Mus musculus transforming growth factor, beta 1 (Tgfb1), mRNA [NM_011577]	GO:0005515|GO:0008219|GO:0002513|GO:0006796|GO:0005615|GO:0007406|GO:0005114|GO:0006754|GO:0010763|GO:0007173|GO:0000165|GO:0002062|GO:0006611|GO:0016202|GO:0009887|GO:0007179|GO:0017015|GO:0000060|GO:0010800|GO:0022408|GO:0009986|GO:0002460|GO:0006952|GO:0000122|GO:0005160|GO:0007182|GO:0007183|GO:0010936|GO:0001501|GO:0007519|GO:0007184|GO:0002028|GO:0016049|GO:0019899|GO:0008083|GO:0007093|GO:…	NM_011577	Mm.248380	21803	58.766	72.5652	6.36457	5.59412	39.704	61.7597	74.8342	54.6977	81.4823	81.5156	5.14795	6.86364	7.08211	5.33613	5.67937	5.76687
A_51_P492087	0.965025	0.976993	1.00636	up	NM_021498	chr4:62185404-62185138	Pole3	Mus musculus polymerase (DNA directed), epsilon 3 (p17 subunit) (Pole3), mRNA [NM_021498]	GO:0043565|GO:0005622|GO:0005515|GO:0008622|GO:0046982|GO:0043966|GO:0003887|GO:0016779|GO:0005671|GO:0005634|GO:0003677|GO:0016740	NM_021498	Mm.27444	59001	160.497	333.582	7.83408	7.82494	202.969	150.585	127.938	316.459	396.577	287.711	7.55777	8.11025	7.83421	7.87554	7.99185	7.60742
A_55_P1956482	0.221498	0.35623	1.55257	up	AK165204	chr14:71001930-71001871	Dmtn	Mus musculus 6 days neonate spleen cDNA, RIKEN full-length enriched library, clone:F420001J19 product:erythrocyte protein band 4.9, full insert sequence. [AK165204]	GO:0035585|GO:0048471|GO:0035584|GO:0030036|GO:0005886|GO:0090303|GO:0008360|GO:0005884|GO:0050732|GO:0010812|GO:0042995|GO:0043621|GO:0051895|GO:0005829|GO:0010591|GO:0005622|GO:0051489|GO:0005737|GO:0010763|GO:1900026|GO:0033137|GO:0048821|GO:0032956|GO:1900025|GO:0007010|GO:0071277|GO:0005856|GO:0031095|GO:0051017|GO:2001046|GO:0031253|GO:0005623|GO:0005102|GO:0030507|GO:0090315|GO:0003779|GO:…		Mm.210863	13829	274.041	379.48	8.59152	7.95686	297.489	196.473	328.162	243.057	351.977	543.407	8.12636	8.47482	9.17338	7.50192	7.81317	8.5555
A_55_P1971867	0.305665	0.44035	3.72191	up	NM_153143	chr11:69693686-69693627	Kctd11	Mus musculus potassium channel tetramerisation domain containing 11 (Kctd11), mRNA [NM_153143]	GO:0003674|GO:0007049|GO:0005737|GO:0045666|GO:0042127|GO:0051260|GO:0045879|GO:0007275|GO:0040008|GO:0030154|GO:0007406|GO:0007399	NM_153143	Mm.239498	216858	50.9117	18.2657	5.43533	3.53928	5	101.366	46.3688	9.98044	28.096	16.7206	2.34394	7.55356	6.40848	3.00152	4.15181	3.46453
A_55_P2122314	0.0385258	0.129309	1.27734	up	NM_146157	chr4:138931751-138931810	Emc1	Mus musculus ER membrane protein complex subunit 1 (Emc1), transcript variant 1, mRNA [NM_146157]	GO:0072546|GO:0008150|GO:0003674|GO:0016020|GO:0016021	NM_146157	Mm.394288	230866	166.598	266.045	7.86521	7.51206	234.258	122.809	142.726	276.686	274.368	247.08	7.75977	7.83308	8.00276	7.68787	7.46722	7.3811
A_55_P1994348	0.888685	0.925046	1.03469	up	NM_001291069	chr3:75680656-75680597	Golim4	Mus musculus golgi integral membrane protein 4 (Golim4), transcript variant 1, mRNA [NM_001291069]	GO:0008150|GO:0003674|GO:0005794|GO:0016020|GO:0006810|GO:0005634|GO:0016021|GO:0005768	NM_001291069	Mm.249232	73124	1268.99	1936.71	10.5162	10.467	2342.7	581.452	882.826	1789.82	2075.05	1945.27	11.0651	9.92784	10.5556	10.4155	10.4865	10.4991
A_52_P106259	0.000841395	0.0293649	2.5714	up	NM_207655	chr11:16813815-16813874	Egfr	Mus musculus epidermal growth factor receptor (Egfr), transcript variant 1, mRNA [NM_207655]	GO:0005515|GO:0042698|GO:0006412|GO:0042802|GO:0005622|GO:0005006|GO:0016337|GO:0021795|GO:0001948|GO:0000166|GO:0007173|GO:0016301|GO:0042127|GO:0007611|GO:0001942|GO:0016772|GO:0030335|GO:0005794|GO:0019901|GO:0009986|GO:0019903|GO:0045740|GO:0001892|GO:0018108|GO:0007275|GO:0043235|GO:0016310|GO:0005178|GO:0008544|GO:0045930|GO:0045121|GO:0019899|GO:0004888|GO:0008284|GO:0005886|GO:0005783|GO:…	NM_207655	Mm.8534	13649	771.709	578.269	10.0086	8.64607	1039.53	665.373	610.225	620.844	630.246	483.719	9.90002	10.1158	10.01	8.85433	8.6984	8.38547
A_66_P136834	0.00496975	0.0499975	2.1955	up	NM_001003918	chr16:8688992-8688933	Usp7	Mus musculus ubiquitin specific peptidase 7 (Usp7), mRNA [NM_001003918]	GO:0005515|GO:0006511|GO:0016579|GO:0004843|GO:0005634|GO:0042803|GO:0005829|GO:0051090|GO:0002039|GO:0005737|GO:0010216|GO:0031647|GO:0006508|GO:0031625|GO:0043065|GO:0007275|GO:0032088|GO:0008022|GO:0006974|GO:0004197|GO:0006281|GO:0016787|GO:0006283|GO:0008233|GO:0004221|GO:0008234|GO:0008134	NM_001003918	Mm.295330	252870	195.967	185.553	8.11974	6.98519	238.892	196.923	152.087	164.449	196.372	195.839	7.79127	8.47926	8.08869	6.92877	6.97617	7.05064
A_66_P100777	0.465821	0.589694	1.27721	up	NM_009216	chr12:59316670-59316729	Sstr1	Mus musculus somatostatin receptor 1 (Sstr1), mRNA [NM_009216]	GO:0005515|GO:0005886|GO:0004930|GO:0007268|GO:0007215|GO:0004994|GO:0007165|GO:0005737|GO:0007186|GO:0016020|GO:0007218|GO:0004871|GO:0016021	NM_009216	Mm.278336	20605	24.5047	44.2598	5.17013	4.81714	25.9007	21.9751	25.6384	26.3327	61.6694	44.7772	4.51281	5.43916	5.55842	4.28918	5.2807	4.88153
A_55_P1955472	0.14438	0.272112	1.41943	up	NM_001033128	chr19:4887093-4887034	Bbs1	Mus musculus Bardet-Biedl syndrome 1 (human) (Bbs1), mRNA [NM_001033128]	GO:0051219|GO:0007608|GO:0021987|GO:0051216|GO:0043001|GO:0045494|GO:0005113|GO:0036064|GO:0008104|GO:0035264|GO:0001895|GO:0042048|GO:0030534|GO:0008594|GO:0044255|GO:0035721|GO:0001103|GO:0005813|GO:0034464|GO:0031514|GO:0005102|GO:0000226|GO:0035058|GO:0016358|GO:0048854|GO:0060296|GO:0009566|GO:0021756|GO:0021766|GO:0042384|GO:0005119|GO:0060271|GO:0042445|GO:0001764	NM_001033128	Mm.23636	52028	26.2169	38.646	5.1928	4.68748	38.8969	22.8058	16.9481	47.8653	32.864	35.2087	5.11767	5.48715	4.97357	5.14315	4.37207	4.54723
A_52_P669964	0.00813401	0.0606586	1.37355	up	NM_146248	chr17:35667707-35667766	Cchcr1	Mus musculus coiled-coil alpha-helical rod protein 1 (Cchcr1), mRNA [NM_146248]	GO:0005515|GO:0005737|GO:0005814|GO:0006611|GO:0007275|GO:0005634|GO:0030154	NM_146248	Mm.49544	240084	167.361	250.033	7.87789	7.41998	228.497	136.843	136.744	232.788	280.564	236.747	7.72254	7.97252	7.93861	7.43798	7.49893	7.32303
A_51_P243134	0.00912448	0.0634971	1.86907	up	NM_007405	chr15:98420418-98420404	Adcy6	Mus musculus adenylate cyclase 6 (Adcy6), mRNA [NM_007405]	GO:0072660|GO:0005886|GO:0031528|GO:0042995|GO:0071380|GO:0046872|GO:0035556|GO:0007190|GO:0000166|GO:0006171|GO:0016849|GO:0019901|GO:0008294|GO:0005102|GO:0007212|GO:0005524|GO:0016829|GO:0042383|GO:0005929|GO:0004016|GO:0016020|GO:0071870|GO:0010977|GO:0045121|GO:0016021|GO:0009190|GO:0005768	NM_007405	Mm.157091	11512	1666.17	1624.14	11.1173	10.2149	1939.34	1394.94	1664.23	1567.71	1642.47	1662.24	10.7879	11.1262	11.4376	10.2228	10.1505	10.2715
A_51_P514412	0.000629283	0.027025	2.13853	up	NM_019827	chr16:38187987-38191632	Gsk3b	Mus musculus glycogen synthase kinase 3 beta (Gsk3b), mRNA [NM_019827]	GO:0005515|GO:0006983|GO:0008013|GO:0030877|GO:0035372|GO:0030010|GO:0007409|GO:0032855|GO:0030154|GO:0000166|GO:0018105|GO:0016301|GO:0043227|GO:0006611|GO:0043025|GO:0009887|GO:0009968|GO:0016055|GO:0031625|GO:0016772|GO:0010800|GO:0005813|GO:0014902|GO:0019901|GO:0005975|GO:0005977|GO:0007275|GO:0007520|GO:0043234|GO:0016310|GO:0005178|GO:0010977|GO:0007623|GO:0001954|GO:0034236|GO:0032091|GO:…	NM_019827	Mm.394930	56637	291.957	268.453	8.60858	7.51195	454.447	217.441	203.983	216.164	292.633	296.562	8.70691	8.61289	8.50592	7.32654	7.55615	7.65317
A_51_P136792	0.0376138	0.127702	1.45176	up	NM_026192	chr15:102537538-102537479	Calcoco1	Mus musculus calcium binding and coiled coil domain 1 (Calcoco1), mRNA [NM_026192]	GO:0003712|GO:0005515|GO:0000790|GO:0044212|GO:0008013|GO:0003713|GO:0005634|GO:0008022|GO:0006351|GO:0043231|GO:0043565|GO:0007165|GO:0005737|GO:0030374|GO:0030518|GO:0045944|GO:0003682|GO:0045893|GO:0016055|GO:2001141|GO:0070016	NM_026192	Mm.71682	67488	17.8818	25.5949	4.65026	4.11246	25.2692	11.3564	17.0197	21.8934	29.6971	25.1942	4.47295	4.49938	4.97845	4.02257	4.23207	4.08274
A_51_P213099	0.104331	0.225812	1.24853	up	AK053689	chr3:109946407-109946348	Ntng1	Mus musculus 0 day neonate eyeball cDNA, RIKEN full-length enriched library, clone:E130203P04 product:hypothetical protein, full insert sequence. [AK053689]	GO:0005515|GO:0016020|GO:0005886|GO:0007275|GO:0031225|GO:0007409|GO:0046658|GO:0030154|GO:0007399		Mm.39262	80883	16.1455	27.1783	4.51913	4.19891	22.7825	12.6041	13.05	26.0544	24.9421	30.5384	4.31698	4.65058	4.58984	4.2726	3.97633	4.3478
A_51_P164207	0.0157944	0.0818993	1.68984	up	NM_011842	chr19:9026535-9026594	Mta2	Mus musculus metastasis-associated gene family, member 2 (Mta2), mRNA [NM_011842]	GO:0005515|GO:0000790|GO:0003700|GO:0044212|GO:0005634|GO:0006323|GO:0046872|GO:0000989|GO:0016581|GO:0045944|GO:0001085|GO:0006338|GO:0004407|GO:0001103|GO:0005667|GO:0006355|GO:0016575|GO:0043044|GO:0031492|GO:0000122|GO:0000978|GO:0003677|GO:0043565|GO:0006306|GO:0043234|GO:0000118|GO:0003682|GO:0000980|GO:0008270|GO:0045892	NM_011842	Mm.25339	23942	3892.89	4002.8	12.3073	11.5504	4415.68	3885.54	3377.45	3671.48	4205.54	4131.38	11.9526	12.5469	12.4224	11.4586	11.5575	11.6351
A_55_P1987121	0.0823753	0.198619	1.24386	up	NM_026528	chr14:20631202-20631143	2700060E02Rik	Mus musculus RIKEN cDNA 2700060E02 gene (2700060E02Rik), mRNA [NM_026528]	GO:0006355|GO:0005737|GO:0045944|GO:0000993|GO:0005634|GO:0015629|GO:0005856|GO:0072669|GO:0006351|GO:0042802	NM_026528	Mm.21932	68045	8457.04	11545	13.4151	13.1003	10430.9	7745.14	7195.05	11161.1	12733.6	10740.4	13.165	13.5498	13.5304	13.0695	13.2062	13.0251
A_55_P1979684	0.000104583	0.0181813	1.68622	up	NM_001291859	chr3:104597203-104597262	Rhoc	Mus musculus ras homolog gene family, member C (Rhoc), transcript variant 1, mRNA [NM_001291859]	GO:0005515|GO:0005886|GO:0007264|GO:0005634|GO:0005525|GO:0032154|GO:0005829|GO:0043297|GO:0005622|GO:0000910|GO:0007165|GO:0000166|GO:0016020|GO:0004871|GO:0043123|GO:0070062	NM_001291859	Mm.262	11853	7364.28	7259.91	13.1901	12.4363	10042.3	6335.78	5714.75	7155.12	7373.02	7251.57	13.112	13.2694	13.1889	12.443	12.4015	12.4644
A_51_P330133	0.400859	0.530941	1.15367	up	NM_025682	chr14:57341929-57341870	Pspc1	Mus musculus paraspeckle protein 1 (Pspc1), mRNA [NM_025682]	GO:0005515|GO:0006355|GO:0005737|GO:0042382|GO:0000166|GO:0003723|GO:0005654|GO:0005634|GO:0003676|GO:0006351	NM_025682	Mm.20129	66645	482.718	785.32	9.28768	9.08146	774.072	335.126	338.955	553.255	975.678	827.026	9.45527	9.1954	9.21238	8.68468	9.35381	9.20588
A_55_P2158741	0.590674	0.696121	1.33465	up	NM_010927	chr11:78773567-78773626	Nos2	Mus musculus nitric oxide synthase 2, inducible (Nos2), mRNA [NM_010927]	GO:0005515|GO:0045859|GO:0005516|GO:0008603|GO:0008013|GO:0010181|GO:0051712|GO:0006801|GO:0051879|GO:0005615|GO:0042803|GO:0006809|GO:0005622|GO:0042127|GO:0032496|GO:0042742|GO:0045296|GO:0005506|GO:0019901|GO:0001542|GO:0018119|GO:0004517|GO:0071346|GO:0003958|GO:0016491|GO:0031284|GO:0055114|GO:0020037|GO:0050661|GO:0050998|GO:0048471|GO:0007263|GO:0050660|GO:0005634|GO:0045776|GO:0046872|GO:…	NM_010927	Mm.2893	18126	175.388	284.754	7.80079	7.38433	276.917	174.935	74.3107	514.563	150.609	189.091	8.01492	8.31479	7.07267	8.57572	6.584	6.99327
A_51_P110301	0.143949	0.271773	2.53246	up	NM_009778	chr17:57343475-57343416	C3	Mus musculus complement component 3 (C3), mRNA [NM_009778]	GO:0006629|GO:0005515|GO:0004866|GO:0072562|GO:0001970|GO:0005615|GO:0008289|GO:0006957|GO:0006956|GO:0050766|GO:0006954|GO:0006958|GO:0006631|GO:0070374|GO:0001798|GO:0070062|GO:0045745|GO:0048037|GO:0005576|GO:0010884|GO:0010866|GO:0010575|GO:0031715|GO:0045766|GO:0010828|GO:0048639|GO:0007596|GO:0045087|GO:0001934|GO:0002376	NM_009778	Mm.19131	12266	4500.83	3646.23	12.5138	11.1733	3968.32	4112.65	5421.51	2806.51	1630.22	6501.96	11.8021	12.6301	13.1093	11.066	10.1346	12.3192
A_51_P224164	0.000577977	0.0263898	10.9002	up	NM_011867	chr12:32204825-32204766	Slc26a4	Mus musculus solute carrier family 26, member 4 (Slc26a4), mRNA [NM_011867]	GO:0006820|GO:0006821|GO:0008509|GO:0005886|GO:0015698|GO:0031526|GO:0015111|GO:0055085|GO:0006885|GO:0032880|GO:0016324|GO:0034220|GO:0016020|GO:0015116|GO:0015108|GO:0006810|GO:0008272|GO:0008271|GO:0009887|GO:0016021|GO:0015705|GO:0070062	NM_011867	Mm.100187	23985	157.385	27.3567	7.64089	4.19461	262.649	139.114	70.3927	20.8356	30.0094	31.2251	7.93516	7.9936	6.9939	3.95804	4.24411	4.38166
A_51_P510891	0.522246	0.639242	1.27677	up	NM_007423	chr5:90937781-90937840	Afp	Mus musculus alpha fetoprotein (Afp), mRNA [NM_007423]	GO:0019953|GO:0005737|GO:0004566|GO:0042448|GO:0006810|GO:0005576|GO:0001542|GO:0060395|GO:0005615|GO:0046872	NM_007423	Mm.358570	11576	691.938	1128.6	9.83061	9.47811	965.155	660.35	450.308	573.181	1927.69	884.91	9.78994	10.1025	9.59938	8.73869	10.3819	9.3138
A_52_P217675	0.634612	0.731137	1.05467	up	NM_134071	chr13:77265872-77265653	Ankrd32	Mus musculus ankyrin repeat domain 32 (Ankrd32), mRNA [NM_134071]	GO:0005515|GO:0005813|GO:0005634	NM_134071	Mm.209730	105377	26.3475	53.4409	5.23163	5.15483	36.4317	22.4224	20.1883	45.6758	62.8931	51.7537	5.01977	5.46484	5.21029	5.07395	5.30623	5.08432
A_51_P351860	0.498345	0.61806	1.32759	up	NM_009777	chr4:136436637-136436578	C1qb	Mus musculus complement component 1, q subcomponent, beta polypeptide (C1qb), mRNA [NM_009777]	GO:0048839|GO:0005581|GO:0045087|GO:0006958|GO:0072562|GO:0005576|GO:0005602|GO:0042803|GO:0002376	NM_009777	Mm.2570	12260	233.236	357.346	8.3408	7.93199	166.361	243.453	289.895	341.469	412.86	317.708	7.26391	8.76428	8.99422	7.9886	8.04867	7.75869
A_51_P124719	0.795902	0.857203	1.02398	up	NM_001025156	chr1:123397921-123397980	Ccdc93	Mus musculus coiled-coil domain containing 93 (Ccdc93), transcript variant 1, mRNA [NM_001025156]	GO:0008150|GO:0003674|GO:0005575	NM_001025156	Mm.25788	70829	307.765	596.714	8.73066	8.69648	428.666	258.993	235.636	608.45	664.576	517.117	8.63241	8.85169	8.70789	8.82779	8.77414	8.4875
A_51_P478688	0.00102315	0.0309998	1.72785	up	NM_172676	chr2:181330510-181330451	Samd10	Mus musculus sterile alpha motif domain containing 10 (Samd10), mRNA [NM_172676]	GO:0008150|GO:0003674|GO:0005575	NM_172676	Mm.205422	229011	695.324	766.588	9.86546	9.07648	907.025	615.906	563.041	733.736	809.043	756.985	9.69317	10.0038	9.89939	9.10218	9.06086	9.0664
A_55_P2114789	0.023028	0.0985085	3.19624	up	NM_001282083	chr9:69870594-69870653	Gtf2a2	Mus musculus general transcription factor II A, 2 (Gtf2a2), transcript variant 1, mRNA [NM_001282083]	GO:0001103|GO:0006355|GO:0006367|GO:0030054|GO:0046982|GO:0006366|GO:0003713|GO:0005634|GO:0006351|GO:0042803|GO:0051091|GO:0045944|GO:0017025|GO:0005672|GO:0051123|GO:0008134	NM_001282083	Mm.293117	235459	199.895	126.27	8.09352	6.41715	181.434	281.906	136.346	113.489	127.572	137.75	7.38193	8.96447	7.93416	6.38599	6.33556	6.52989
A_55_P2148366	0.0692482	0.179613	1.39248	up	XM_006542957	chr11:57646316-57646257	Hand1	heart and neural crest derivatives expressed transcript 1 [Source:MGI Symbol;Acc:MGI:103577] [ENSMUST00000108845]	GO:0005515|GO:0055010|GO:0044212|GO:0006366|GO:0005634|GO:0061371|GO:0043433|GO:0042803|GO:0003219|GO:0030154|GO:0042802|GO:0003218|GO:0001947|GO:0007507|GO:0005737|GO:0045944|GO:0003144|GO:0046983|GO:0042475|GO:0006355|GO:0001707|GO:0046982|GO:0035050|GO:0001709|GO:0060707|GO:0060411|GO:0003713|GO:0005730|GO:0043425|GO:0007275|GO:0001525|GO:0000122|GO:0003677|GO:0001701|GO:0006351|GO:0043565|GO:…	XM_006542957	Mm.4746	15110	85.6132	118.167	6.79871	6.32105	147.1	45.5005	64.2388	105.185	122.643	126.674	7.08706	6.44327	6.86579	6.28261	6.27347	6.40707
A_52_P382914	0.00570337	0.0531636	2.43992	up	NM_011639	chr5:137751212-137751153	Trip6	Mus musculus thyroid hormone receptor interactor 6 (Trip6), mRNA [NM_011639]	GO:0005515|GO:0005149|GO:0006355|GO:0030335|GO:0030054|GO:0005886|GO:0005634|GO:0046872|GO:0006351|GO:0045323|GO:0005737|GO:0008588|GO:0008270|GO:0005856|GO:0007155|GO:0019900|GO:0005925	NM_011639	Mm.27063	22051	649.035	520.691	9.78051	8.49367	758.83	661.066	527.207	578.58	484.957	498.535	9.42996	10.1047	9.80687	8.75566	8.29386	8.43149
A_51_P378298	0.936027	0.957967	1.15891	up	NM_026976	chr1:132777256-132777315	Faim3	Mus musculus Fas apoptotic inhibitory molecule 3 (Faim3), mRNA [NM_026976]	GO:0016020|GO:0016021|GO:0002376	NM_026976	Mm.46042	69169	93.834	465.367	6.34854	6.13577	9.65671	136.496	135.349	20.5341	36.9757	1338.59	3.15377	7.96934	7.92252	3.93682	4.5282	9.94231
A_55_P2071858	0.0267024	0.106307	1.49605	up	NM_008598	chr7:144319790-144319849	Mgmt	Mus musculus O-6-methylguanine-DNA methyltransferase (Mgmt), mRNA [NM_008598]	GO:0003908|GO:0005509|GO:0008168|GO:0005634|GO:0045739|GO:0003824|GO:0003677|GO:0032259|GO:0046872|GO:0006974|GO:0006281|GO:0006307|GO:0043281|GO:0060548|GO:0016740	NM_008598	Mm.440219	17314	58.551	81.623	6.36265	5.78149	85.3289	42.5733	47.7508	88.8414	70.9014	85.1261	6.27909	6.35696	6.45188	6.0344	5.47895	5.83111
A_51_P520699	0.499806	0.619325	1.04466	up	NM_001207021	chr15:82038197-82037935	AI848285	Mus musculus expressed sequence AI848285 (AI848285), mRNA [NM_001207021]	GO:0008150|GO:0003674|GO:0005575	NM_001207021	Mm.41289	435145	16.2964	32.07	4.48992	4.42688	25.2521	12.059	11.5782	28.6226	37.5674	30.0201	4.47196	4.58766	4.41013	4.40806	4.55171	4.32086
A_51_P154684	0.414815	0.54364	1.11585	up	NM_011568	chr11:120455916-120455857	Alyref	Mus musculus Aly/REF export factor (Alyref), mRNA [NM_011568]	GO:0008380|GO:0006397|GO:0005737|GO:0003697|GO:0000166|GO:0003723|GO:0006810|GO:0005681|GO:0005634|GO:0051028|GO:0003676	NM_011568	Mm.1886	21681	5277.26	7852.52	12.7079	12.5498	6801.4	5439.89	3590.48	7853.04	7681.49	8023.04	12.5717	13.0419	12.5101	12.577	12.461	12.6113
A_51_P253897	0.00553845	0.0526607	2.87075	up	NM_028216	chr15:74546879-74546938	Psca	Mus musculus prostate stem cell antigen (Psca), mRNA [NM_028216]	GO:0016020	NM_028216	Mm.46395	72373	138.895	98.9526	7.57676	6.05533	191.689	138.709	86.2854	113.228	85.8626	97.7669	7.46341	7.98912	7.27775	6.38273	5.75744	6.02583
A_55_P2031432	0.102223	0.223488	1.31862	up	NM_177249	chr7:119236944-119245254	Usp47	Mus musculus ubiquitin specific peptidase 47 (Usp47), transcript variant 1, mRNA [NM_177249]	GO:0006511|GO:0043066|GO:0004843|GO:0030307|GO:0042493|GO:0006974|GO:0034644|GO:0005737|GO:0006281|GO:0010972|GO:0016787|GO:0071987|GO:0006284|GO:0035520|GO:0006508|GO:0008233|GO:0008234|GO:0043154|GO:0045892|GO:0019005	NM_177249	Mm.16974	74996	206.037	297.187	8.05505	7.65603	354.965	134.164	128.984	248.656	360.841	282.062	8.37127	7.94726	7.84663	7.53901	7.85332	7.57576
A_51_P109171	0.531887	0.64716	1.08532	up	NM_177614	chr10:126532833-126532774	Os9	Mus musculus amplified in osteosarcoma (Os9), transcript variant 2, mRNA [NM_177614]	GO:0034976|GO:0016567|GO:0001948|GO:0042787|GO:0005783|GO:0005788|GO:0006621|GO:0006605|GO:0030433|GO:0002020	NM_177614	Mm.295246	216440	5211.67	8277.89	12.7327	12.6146	6190.09	4753.37	4691.56	9241.49	8199.08	7393.1	12.4456	12.8525	12.9	12.8017	12.5523	12.4897
A_55_P2098354	0.879716	0.919243	1.07111	up	NM_001013829	chr2:122174994-122174935	Shf	Mus musculus Src homology 2 domain containing F (Shf), mRNA [NM_001013829]	GO:0008150|GO:0003674|GO:0006915|GO:0005575	NM_001013829	Mm.458215	435684	126.235	167.664	6.925	6.82589	292.349	43.9413	42.4134	195.544	152.362	155.086	8.10086	6.40067	6.27347	7.17178	6.60148	6.70442
A_55_P2083824	0.00541784	0.0519872	3.93144	up	AK007003	chr7:29221914-29221972	1700085B13Rik	Mus musculus adult male testis cDNA, RIKEN full-length enriched library, clone:1700085B13 product:unclassifiable, full insert sequence. [AK007003]	GO:0008150|GO:0003674|GO:0005575		Mm.23521	76721	36.3852	20.2089	5.73515	3.76009	38.0997	34.3705	36.6852	16.1715	19.3622	25.0931	5.08822	6.05591	6.06131	3.57592	3.62607	4.07829
A_51_P437327	0.518766	0.636242	1.09708	up	NM_008553	chr10:86955161-86955102	Ascl1	Mus musculus achaete-scute complex homolog 1 (Drosophila) (Ascl1), mRNA [NM_008553]	GO:0010468|GO:0005515|GO:0007389|GO:0060579|GO:0003700|GO:0048709|GO:0000989|GO:0030154|GO:0042803|GO:0007405|GO:0003690|GO:0043525|GO:0007219|GO:0050883|GO:0042127|GO:0046983|GO:0043025|GO:0045747|GO:0021879|GO:0048486|GO:0007275|GO:0045787|GO:0048485|GO:0048484|GO:0010001|GO:0003358|GO:0045892|GO:0003359|GO:0021987|GO:0021530|GO:0048699|GO:0005634|GO:0050767|GO:0030856|GO:0050769|GO:0048666|GO:…	NM_008553	Mm.136217	17172	21.842	37.5833	4.79617	4.66251	39.9483	13.0593	12.5183	33.9512	40.0679	38.7308	5.16027	4.70174	4.52652	4.65648	4.65097	4.68007
A_55_P2048101	0.00345066	0.0438551	2.32533	up		chr9:035381823-035381764							228.11	190.291	8.22899	7.01156	367.545	185.856	130.929	189.427	208.727	172.718	8.41915	8.39796	7.86987	7.11672	7.06242	6.85553
A_55_P2123566	0.0666124	0.175748	1.55683	up	AK132916	chr8:128040891-128040832	Sipa1l2	Mus musculus adult male testis cDNA, RIKEN full-length enriched library, clone:4930515A19 product:hypothetical protein, full insert sequence. [AK132916]	GO:0051056|GO:0008150|GO:0003674|GO:0005575|GO:0005096		Mm.271668	244668	239.409	325.204	8.41227	7.77366	284.298	242.361	191.569	294.191	413.447	267.974	8.06406	8.75511	8.41765	7.77036	8.05099	7.49963
A_55_P1997894	0.00837837	0.0612777	1.59296	up		chr7:034960919-034960978							5927.97	6336.44	12.9094	12.2377	7234.59	5622.14	4927.17	5869.76	6919.92	6219.64	12.6578	13.0982	12.9721	12.1517	12.3075	12.2538
A_55_P2031651	0.10456	0.22599	1.19267	up		chr14:062178493-062178552							37.6424	64.411	5.68493	5.43073	60.1988	26.3489	26.3794	61.834	75.1101	56.289	5.76441	5.69445	5.59593	5.51336	5.56829	5.21054
A_55_P2150476	0.619278	0.719028	1.09464	up									16.6372	27.962	4.37978	4.24933	30.8778	10.6758	8.35796	27.5575	29.0188	27.3096	4.7736	4.41177	3.95397	4.35152	4.20163	4.19483
A_51_P145785	0.24072	0.376436	1.71518	up	NM_007443	chr4:62804711-62804386	Ambp	Mus musculus alpha 1 microglobulin/bikunin (Ambp), mRNA [NM_007443]	GO:0005886|GO:0009986|GO:0004867|GO:0010466|GO:0036094|GO:0072562|GO:0005576|GO:0030414|GO:0005615|GO:0042803|GO:0043231|GO:0010951|GO:0051604|GO:0018298|GO:0030163|GO:0019862|GO:0070062|GO:0020037	NM_007443	Mm.2197	11699	102.158	100.823	6.77031	5.99195	220.32	46.8203	39.333	62.8176	156.323	83.3277	7.6698	6.47811	6.16302	5.53993	6.63567	5.80025
A_52_P413623	0.346413	0.480806	1.19653	up	NM_001004143	chr11:60966417-60966358	Usp22	Mus musculus ubiquitin specific peptidase 22 (Usp22), mRNA [NM_001004143]	GO:0016578|GO:0006511|GO:0016579|GO:0006355|GO:0004843|GO:0016574|GO:0003713|GO:0005634|GO:0046872|GO:0006351|GO:0070461|GO:0045931|GO:0007049|GO:0030374|GO:0016787|GO:0043967|GO:0000124|GO:0006508|GO:0008233|GO:0008270|GO:0010485|GO:0008234|GO:0045893|GO:0016568	NM_001004143	Mm.30602	216825	181.086	308.108	7.92884	7.66998	290.282	122.501	130.476	202.509	393.898	327.918	8.09064	7.83015	7.86573	7.22444	7.98219	7.80332
A_55_P2002133	0.838242	0.888766	1.01569	up	NM_153178	chr15:72935764-72935705	Ago2	Mus musculus argonaute RISC catalytic subunit 2 (Ago2), mRNA [NM_153178]	GO:0005515|GO:0003723|GO:0005634|GO:0031047|GO:0003729|GO:0009791|GO:0035279|GO:0046872|GO:0030154|GO:0035068|GO:0016442|GO:0070551|GO:0005737|GO:0000932|GO:0031054|GO:0045947|GO:0000340|GO:0006379|GO:0006355|GO:0060213|GO:0007275|GO:0004521|GO:0003676|GO:0006351|GO:0006417|GO:0035278|GO:0004518|GO:0004519|GO:0035197|GO:0016787|GO:1900153|GO:0030529|GO:0005844|GO:0005845	NM_153178	Mm.490340	239528	270.67	506.718	8.47694	8.45448	441.893	186.251	183.867	492.713	526.768	500.673	8.67397	8.40065	8.35619	8.50864	8.41826	8.43653
A_52_P59206	0.252881	0.388783	1.2516	up	NM_028623	chr19:5348041-5347982	Cst6	Mus musculus cystatin E/M (Cst6), mRNA [NM_028623]	GO:0004869|GO:0008544|GO:0010466|GO:0030414|GO:0001533	NM_028623	Mm.36816	73720	2140.6	2901.03	11.3583	11.0345	3452.15	1353.25	1616.39	3344.6	3194.08	2164.4	11.593	11.0836	11.3982	11.3114	11.1262	10.6659
A_55_P1995195	0.000724528	0.0280365	2.1003	up	NM_008037	chr5:32460076-32460135	Fosl2	Mus musculus fos-like antigen 2 (Fosl2), mRNA [NM_008037]	GO:0001666|GO:0006355|GO:0000977|GO:0003700|GO:0006366|GO:0044212|GO:0005634|GO:0048146|GO:0003677|GO:0006351|GO:0043565|GO:0003690|GO:0045893|GO:0032355	NM_008037	Mm.24684	14284	3804.52	3034.03	12.1987	11.1281	5675.38	3026.91	2711.27	3074	2819.42	3208.67	12.3172	12.1811	12.0977	11.1927	10.9415	11.2501
A_55_P2011061	0.00363868	0.0445917	2.53887	up	NM_173007	chr6:21721482-21721423	Tspan12	Mus musculus tetraspanin 12 (Tspan12), mRNA [NM_173007]	GO:0042813|GO:0016020|GO:0005886|GO:0005887|GO:0045765|GO:0010842|GO:0016021|GO:0001525|GO:0007166	NM_173007	Mm.21950	269831	1961.3	1370.08	11.2852	9.94097	2870.86	1739.8	1273.26	1638.94	1172.07	1299.21	11.3417	11.444	11.0698	10.2888	9.63595	9.89813
A_55_P1980501	0.624928	0.723707	1.05188	up	NM_027318	chr5:137458284-137458225	Znhit1	Mus musculus zinc finger, HIT domain containing 1 (Znhit1), mRNA [NM_027318]	GO:0042826|GO:0031063|GO:0003682|GO:0042129|GO:0005634|GO:0070317|GO:0000122|GO:0046872	NM_027318	Mm.273147	70103	351.723	662.136	8.93003	8.85706	458.41	313.614	283.144	685.542	690.139	610.728	8.71974	9.10988	8.96047	9.00417	8.82978	8.73722
A_55_P1974377	0.0810695	0.196858	5.82461	up	NM_001039120	chr2:152333593-152333534	Defb26	Mus musculus defensin beta 26 (Defb26), mRNA [NM_001039120]	GO:0008150|GO:0003674|GO:0006952|GO:0005576|GO:0005575|GO:0042742	NM_001039120	Mm.389363	654457	50.1744	15.2262	5.85677	3.3146	16.8424	90.2469	43.4339	8.98815	24.4877	12.2027	3.86017	7.39954	6.31058	2.90612	3.95281	3.08489
A_55_P2102065	0.353123	0.4871	1.51884	up	NM_001122660	chr9:78153243-78153302	Gm10639	Mus musculus predicted gene 10639 (Gm10639), mRNA [NM_001122660]	GO:0008150|GO:0003674|GO:0005575|GO:0004364|GO:0016740	NM_001122660	Mm.482247	100042314	42902.2	36948	15.2801	14.6771	92978.8	15716.3	20011.6	36449.4	22838.5	51556.2	16.1609	14.6287	15.0506	14.7373	14.0462	15.2477
A_55_P2035439	0.012095	0.0720759	1.53879	up	NM_013840	chrX:20529124-20529065	Uxt	Mus musculus ubiquitously expressed transcript (Uxt), mRNA [NM_013840]	GO:0005813|GO:0006355|GO:0005815|GO:0006366|GO:0001106|GO:0016272|GO:0048487|GO:0000226|GO:0005634|GO:0000122|GO:0006351|GO:0051297|GO:0005737|GO:0006457|GO:0003682|GO:0000930|GO:0051082|GO:0005856	NM_013840	Mm.34779	22294	947.449	1122.27	10.2844	9.66257	1239.52	933.331	669.494	1091.52	1162.01	1113.29	10.1467	10.5669	10.1396	9.69251	9.62372	9.67149
A_51_P105709	0.613739	0.714866	1.1544	up	NM_027182	chr13:74050175-74050116	Trip13	Mus musculus thyroid hormone receptor interactor 13 (Trip13), mRNA [NM_027182]	GO:0005515|GO:0017111|GO:0048477|GO:0007286|GO:0001556|GO:0007283|GO:0005524|GO:0030154|GO:0042802|GO:0006302|GO:0007126|GO:0007144|GO:0000166|GO:0001673|GO:0007130|GO:0007141|GO:0007131	NM_027182	Mm.275095	69716	330.104	566.63	8.82596	8.61882	326.315	430.741	233.256	521.655	651.781	526.454	8.25662	9.52681	8.69445	8.59541	8.74952	8.51154
A_55_P1995135	0.0181694	0.0879518	2.35207	up	NM_027195	chr4:148319162-148319221	Casz1	Mus musculus castor zinc finger 1 (Casz1), transcript variant 2, mRNA [NM_027195]	GO:0008150|GO:0006355|GO:0005737|GO:0005634|GO:0003677|GO:0046872|GO:0006351|GO:0043231	NM_027195	Mm.233879	69743	1441.56	1143.27	10.9244	9.69045	1372.19	1544.09	1408.39	1130.16	1188.25	1111.4	10.2879	11.2693	11.216	9.74469	9.65848	9.66819
A_55_P2158181	0.0742315	0.186809	1.59186	up	NM_146825	chr9:20091021-20091080	Olfr39	Mus musculus olfactory receptor 39 (Olfr39), mRNA [NM_146825]	GO:0050911|GO:0007608|GO:0007165|GO:0004984|GO:0016020|GO:0007186|GO:0005886|GO:0004930|GO:0016021|GO:0004871|GO:0050896	NM_146825	Mm.223248	258822	13.2257	17.5316	4.24123	3.57051	16.9988	9.78144	12.8969	19.7903	14.3648	18.4398	3.87434	4.27893	4.57041	3.88199	3.21719	3.61235
A_51_P368713	0.0270044	0.10674	1.30428	up	NM_026617	chr10:119657822-119659102	Tmbim4	Mus musculus transmembrane BAX inhibitor motif containing 4 (Tmbim4), mRNA [NM_026617]	GO:0050848|GO:0003674|GO:0043066|GO:0005794|GO:0016020|GO:0005795|GO:0006915|GO:0016021	NM_026617	Mm.157426	68212	1358.6	1798.16	10.7434	10.3601	2161.23	981.393	933.171	1815.93	1889.6	1688.96	10.9529	10.6344	10.6428	10.4336	10.3528	10.2939
A_55_P2038573	0.169175	0.299803	1.48133	up		chrX:098995962-098995903							9567.47	11272.9	13.6238	13.0569	9290.78	9640.67	9770.97	12375.5	9664.5	11778.7	13.0068	13.8858	13.9787	13.2244	12.7867	13.1596
A_55_P2150697	0.747302	0.82095	1.15947	up	NM_028719	chr9:104935202-104935261	Cpne4	Mus musculus copine IV (Cpne4), mRNA [NM_028719]	GO:0005515|GO:0008150|GO:0005575	NM_028719	Mm.326240	74020	15.7929	31.4549	4.50395	4.29048	14.6243	12.6932	20.0612	26.5299	18.5571	49.2777	3.6529	4.65939	5.19955	4.29894	3.55778	5.01473
A_55_P2144481	0.0922546	0.210857	1.31422	up		chrX:71816037-71815978		olfactory receptor 1326, pseudogene 1 [Source:MGI Symbol;Acc:MGI:3031160] [ENSMUST00000059880]					16.1732	23.1026	4.37036	3.97615	28.9019	8.72854	10.8891	22.1641	22.527	24.6166	4.675	4.11004	4.32604	4.04247	3.83614	4.04985
A_51_P371745	0.302226	0.436918	2.12407	up	AF399829	chr11:46569677-46569736	Havcr1	Mus musculus strain BALB/c TIM1 mRNA, complete cds. [AF399829]	GO:0005515|GO:0016020|GO:0016021|GO:0033005		Mm.17771	171283	10.5474	10.2025	3.89756	2.81073	5	13.6166	13.0257	5	5	20.6074	2.34394	4.76182	4.58691	2.32438	2.32205	3.78576
A_55_P2185900	0.546381	0.659511	1.42533	up	NM_032002	chr9:55068089-55068030	Nrg4	Mus musculus neuregulin 4 (Nrg4), mRNA [NM_032002]	GO:0016020|GO:0005886|GO:0005576|GO:0016021|GO:0008083	NM_032002	Mm.443874	83961	91.8407	82.2122	6.26573	5.75443	224.16	18.3917	32.9707	53.89	97.6255	95.1211	7.69862	5.19153	5.90705	5.31887	5.95408	5.99035
A_51_P122649	0.00514258	0.0507998	1.35686	up	NM_027299	chr12:109928560-109928501	Degs2	Mus musculus degenerative spermatocyte homolog 2 (Drosophila), lipid desaturase (Degs2), transcript variant 1, mRNA [NM_027299]	GO:0006629|GO:0000170|GO:0006667|GO:0016020|GO:0005783|GO:0030148|GO:0016491|GO:0016705|GO:0016021|GO:0046513|GO:0042284|GO:0055114	NM_027299	Mm.207605	70059	7841.67	9697.13	13.2947	12.8544	10460.5	6516.17	6548.3	9669.79	10496.2	8925.4	13.1732	13.3126	13.3983	12.8671	12.9244	12.7718
A_55_P2166602	0.00488237	0.049586	1.69679	up	NM_001044386	chrX:91322245-91322186	Zfx	Mus musculus zinc finger protein X-linked (Zfx), transcript variant 1, mRNA [NM_001044386]	GO:0060746|GO:0006355|GO:0016265|GO:0005634|GO:0007283|GO:0009790|GO:0003676|GO:0009791|GO:0048599|GO:0003677|GO:0007281|GO:0046872|GO:0006351|GO:0048872|GO:0009566|GO:0001541|GO:0035264	NM_001044386	Mm.919	22764	178.954	208.526	7.90168	7.13888	291.951	122.171	122.74	169.176	242.087	214.315	8.09905	7.82592	7.78008	6.96612	7.27873	7.17178
A_51_P333965	0.899621	0.932599	1.02393	up	NM_025902	chr3:135070200-135070141	Cisd2	Mus musculus CDGSH iron sulfur domain 2 (Cisd2), mRNA [NM_025902]	GO:0048471|GO:0051536|GO:0000422|GO:0051537|GO:0005783|GO:0006914|GO:0005741|GO:0010259|GO:0046872|GO:0042803|GO:0043231|GO:0005739|GO:0043234|GO:0016020|GO:0005789|GO:0010506|GO:0016021	NM_025902	Mm.269993	67006	334.089	620.876	8.74796	8.71385	564.611	218.136	219.518	441.384	822.67	598.573	9.01877	8.61711	8.60801	8.34628	9.09022	8.70504
A_51_P106059	0.00132234	0.0331013	2.06768	up	NM_009423	chr11:77972972-77972913	Traf4	Mus musculus TNF receptor associated factor 4 (Traf4), mRNA [NM_009423]	GO:0004842|GO:0090073|GO:0030054|GO:0016567|GO:0019901|GO:0005886|GO:0007585|GO:0050699|GO:0030323|GO:0046330|GO:0006915|GO:0042981|GO:0031996|GO:0005634|GO:0007275|GO:0046872|GO:0007165|GO:0005737|GO:0016020|GO:0045860|GO:0008270|GO:0005923|GO:0005856|GO:0031625	NM_009423	Mm.390418	22032	2885.58	2458.2	11.8688	10.8208	3549.06	2741.24	2366.45	2471.36	2446.23	2457.01	11.6369	12.0568	11.9127	10.8725	10.7324	10.8575
A_55_P2009069	0.611239	0.712897	1.11582	up	XM_006500957	chr3:51048571-51048630	Ccrn4l	CCR4 carbon catabolite repression 4-like (S. cerevisiae) [Source:MGI Symbol;Acc:MGI:109382] [ENSMUST00000144826]	GO:0005515|GO:0006397|GO:0048471|GO:0033962|GO:0000290|GO:0005634|GO:0003729|GO:0046872|GO:0032922|GO:0045995|GO:0004535|GO:0004518|GO:0004527|GO:0005737|GO:0045668|GO:0016787|GO:0000932|GO:0010629|GO:0045600|GO:0032496|GO:0042752|GO:0048511|GO:0048255	XM_006500957	Mm.30438	12457	4484.34	7014.36	12.5258	12.3677	4661.79	4239.39	4551.84	7034.88	8346.99	5661.22	12.0326	12.6855	12.8592	12.4183	12.5779	12.1068
A_52_P221804	0.00355553	0.0441858	2.51415	up	NM_030731	chr13:104991894-104991953	Trim23	Mus musculus tripartite motif-containing 23 (Trim23), mRNA [NM_030731]	GO:0004842|GO:0016567|GO:0005794|GO:0007264|GO:0016874|GO:0003924|GO:0005634|GO:0005525|GO:0005765|GO:0005764|GO:0046872|GO:0042802|GO:0005622|GO:0006184|GO:0006471|GO:0005737|GO:0016020|GO:0000139|GO:0000166|GO:0008270|GO:0019003	NM_030731	Mm.244190	81003	161.17	135.46	7.84853	6.51846	191.733	133.199	158.577	119.712	134.912	151.755	7.46427	7.93825	8.14307	6.46513	6.41412	6.67613
A_55_P1992019	0.0366068	0.12588	2.29126	up	NM_001083119	chr4:131324432-131324373	Ptpru	Mus musculus protein tyrosine phosphatase, receptor type, U (Ptpru), transcript variant 2, mRNA [NM_001083119]	GO:0030336|GO:0030054|GO:0008285|GO:0005886|GO:0008013|GO:0035335|GO:0030154|GO:0016791|GO:0034109|GO:0016337|GO:0006470|GO:0016020|GO:0016787|GO:0005911|GO:0034394|GO:0016311|GO:0004721|GO:0016021|GO:0007155|GO:0060070|GO:0004725	NM_001083119	Mm.4860	19273	256.702	229.792	8.49017	7.29403	260.54	184.361	325.205	244.164	203.629	241.582	7.92304	8.38904	9.15841	7.50812	7.02503	7.34892
A_51_P125691	0.602972	0.706151	1.0489	up	NM_028023	chr12:114059030-114058971	Cdca4	Mus musculus cell division cycle associated 4 (Cdca4), mRNA [NM_028023]	GO:0008150|GO:0003674|GO:0005634	NM_028023	Mm.313185	71963	178.825	339.647	7.93176	7.86288	268.484	151.046	116.945	305.56	375.965	337.417	7.97043	8.11607	7.70877	7.82741	7.91573	7.84548
A_51_P134262	0.482516	0.604363	1.05215	up	NR_027956	chr11:105041225-105041166	1700052K11Rik	Mus musculus RIKEN cDNA 1700052K11 gene (1700052K11Rik), long non-coding RNA [NR_027956]		NR_027956	Mm.351426	73431	341.248	628.307	8.84826	8.77493	495.765	290.546	237.435	553.074	688.462	643.385	8.82177	9.00366	8.71937	8.68381	8.8255	8.81547
A_51_P128648	0.239725	0.375286	1.13108	up	NM_025899	chr7:127802599-127802658	Uqcrc2	Mus musculus ubiquinol cytochrome c reductase core protein 2 (Uqcrc2), mRNA [NM_025899]	GO:0005739|GO:0016020|GO:0070469|GO:0006810|GO:0006508|GO:0005743|GO:0005750|GO:0004222|GO:0003824|GO:0032403|GO:0046872|GO:0055114	NM_025899	Mm.334206	67003	18460.6	28301.6	14.5553	14.3776	23824.6	16796.6	14760.6	26862.7	31960.1	26082	14.3526	14.7334	14.5799	14.3136	14.5095	14.3098
A_51_P253633	0.137748	0.264924	1.10528	up	NM_023514	chr1:42956365-42960169	Mrps9	Mus musculus mitochondrial ribosomal protein S9 (Mrps9), mRNA [NM_023514]	GO:0005739|GO:0003735|GO:0030529|GO:0005730|GO:0005840|GO:0006412	NM_023514	Mm.252982	69527	707.812	1154.23	9.84193	9.69752	1078.64	526.036	518.76	1083	1309.62	1070.08	9.95059	9.79128	9.78394	9.68042	9.8018	9.61034
A_55_P2112230	0.00394646	0.0460084	1.61546	up	NM_024229	chr11:120471461-120471402	Pcyt2	Mus musculus phosphate cytidylyltransferase 2, ethanolamine (Pcyt2), mRNA [NM_024229]	GO:0006629|GO:0004306|GO:0009058|GO:0016779|GO:0008654|GO:0003824|GO:0016740	NM_024229	Mm.21439	68671	11733.7	12187.7	13.8725	13.1806	15343.8	10775.8	9081.31	12222	13328.2	11012.8	13.7092	14.0499	13.8584	13.2058	13.271	13.065
A_51_P327778	0.0346266	0.12216	1.45135	up	NM_011070	chr1:173286721-173286866	Pfdn2	Mus musculus prefoldin 2 (Pfdn2), mRNA [NM_011070]	GO:0005739|GO:0003674|GO:0005737|GO:0005794|GO:0006457|GO:0016272|GO:0005730|GO:0005634|GO:0051082|GO:0005829	NM_011070	Mm.10756	18637	392.606	505.729	8.98694	8.44955	631.127	319.253	227.437	453.944	566.333	496.912	9.17261	9.13141	8.65681	8.3917	8.53167	8.42527
A_55_P1953028	0.0423521	0.135754	1.91561	up	NM_011614	chr11:69500401-69500342	Tnfsf12	Mus musculus tumor necrosis factor (ligand) superfamily, member 12 (Tnfsf12), mRNA [NM_011614]	GO:0008219|GO:2001238|GO:0048471|GO:0005576	NM_011614	Mm.8983	21944	110.417	123.06	7.31181	6.37401	118.808	120.967	91.4769	106.197	149.176	113.808	6.76301	7.81028	7.36214	6.29839	6.56891	6.25472
A_51_P179697	0.000482829	0.0258516	3.6764	up	NM_026884	chr7:133973476-133973535	Fam57b	Mus musculus family with sequence similarity 57, member B (Fam57b), transcript variant 2, mRNA [NM_026884]	GO:0006629|GO:0005794|GO:0016020|GO:0045599|GO:0005783|GO:0050291|GO:0016021|GO:0046513	NM_026884	Mm.440393	68952	41.7561	24.1347	5.91381	4.03552	52.4897	36.8562	35.9225	21.9717	25.4076	25.0249	5.56214	6.15167	6.02763	4.02862	4.00395	4.07399
A_55_P2090535	0.00258903	0.0395748	2.39519	up	NM_146153	chr4:125849065-125849006	Thrap3	Mus musculus thyroid hormone receptor associated protein 3 (Thrap3), mRNA [NM_146153]	GO:0008380|GO:0048026|GO:0051219|GO:0006367|GO:0006366|GO:0005634|GO:0046966|GO:0000166|GO:0030518|GO:0000381|GO:0045944|GO:0004872|GO:0048255|GO:0035145|GO:0003712|GO:0006397|GO:0006355|GO:0001104|GO:0003713|GO:0000956|GO:0005524|GO:0006351|GO:0016592|GO:0045893|GO:0030521	NM_146153	Mm.236211	230753	74.0986	65.6642	6.72305	5.46291	96.0141	71.5093	54.7725	56.1812	72.4789	68.3324	6.45287	7.07174	6.64453	5.37461	5.5148	5.49931
A_55_P2052420	0.00280969	0.0408981	1.56114	up	NM_028385	chr6:113103335-113103394	Setd5	Mus musculus SET domain containing 5 (Setd5), mRNA [NM_028385]	GO:0008150|GO:0003674|GO:0005575	NM_028385	Mm.367159	72895	3708.8	4038.26	12.2089	11.5663	4932.65	2885.71	3308.02	3775.56	4224.88	4114.35	12.1068	12.1288	12.3911	11.5049	11.5649	11.6291
A_52_P337679	0.00230158	0.0377516	1.37541	up	NM_007597	chr11:50108106-50108047	Canx	Mus musculus calnexin (Canx), transcript variant 1, mRNA [NM_007597]	GO:0005515|GO:0072583|GO:0030424|GO:0005783|GO:0032839|GO:0046872|GO:0005737|GO:0001948|GO:0043197|GO:0006457|GO:0043025|GO:0005791|GO:0005509|GO:0005623|GO:0048488|GO:0005790|GO:0043234|GO:0016020|GO:0035255|GO:0061077|GO:0005789|GO:0005840|GO:0016021|GO:0034185|GO:0051082	NM_007597	Mm.248827	12330	5958.05	7109.21	12.8628	12.4029	8626.15	4502.43	4745.56	6603.03	7298.86	7425.74	12.8962	12.7744	12.9177	12.3259	12.3879	12.495
A_51_P202745	0.0965963	0.216423	1.34593	up	NM_026083	chr14:75730024-75730083	Zc3h13	Mus musculus zinc finger CCCH type containing 13 (Zc3h13), mRNA [NM_026083]	GO:0008150|GO:0005575|GO:0046872	NM_026083	Mm.74704	67302	387.945	577.367	9.07619	8.64759	458.998	386.86	317.976	541.24	639.481	551.379	8.72046	9.3862	9.12193	8.64853	8.72097	8.57327
A_51_P102503	0.928036	0.952384	1.00574	up	NM_175224	chr3:138122199-138122140	Metap1	Mus musculus methionyl aminopeptidase 1 (Metap1), mRNA [NM_175224]	GO:0005737|GO:0016787|GO:0004177|GO:0008235|GO:0006508|GO:0008233|GO:0005575|GO:0046872	NM_175224	Mm.26833	75624	2053.28	3500.39	11.3519	11.3436	3027.74	1752.81	1379.28	3463.47	3719.67	3318.04	11.4123	11.4567	11.1865	11.3657	11.3595	11.3056
A_51_P489996	0.263909	0.39981	1.24537	up	NM_010081	chr1:34239785-34239844	Dst	Mus musculus dystonin (Dst), transcript variant 4, mRNA [NM_010081]	GO:0005515|GO:0005882|GO:0008017|GO:0030056|GO:0048471|GO:0030018|GO:0008090|GO:0030054|GO:0005886|GO:0005783|GO:0031122|GO:0005634|GO:0042995|GO:0005635|GO:0007409|GO:0015629|GO:0046872|GO:0042803|GO:0005622|GO:0005737|GO:0014704|GO:0015630|GO:0007050|GO:0005856|GO:0007155|GO:0060053|GO:0001725|GO:0031110|GO:0005874|GO:0005509|GO:0005623|GO:0046907|GO:0003779|GO:0097038|GO:0042383|GO:0016020|GO:…	NM_010081	Mm.336625	13518	141.788	210.594	7.47397	7.1574	259.771	87.6547	77.9379	185.389	247.746	198.646	7.91784	7.36127	7.1428	7.08795	7.31457	7.06967
A_51_P430766	0.0080448	0.0605315	6.97397	up	NM_010548	chr1:132920943-132921002	Il10	Mus musculus interleukin 10 (Il10), mRNA [NM_010548]	GO:0010468|GO:0051045|GO:0032715|GO:0060670|GO:0002237|GO:0001818|GO:0050715|GO:0005615|GO:0002740|GO:0045348|GO:0051091|GO:0006955|GO:0006954|GO:0045019|GO:0045944|GO:0002904|GO:0044130|GO:0032689|GO:0042742|GO:0002875|GO:0043066|GO:0030886|GO:0042536|GO:0030889|GO:0032720|GO:0051384|GO:0005576|GO:0005141|GO:0005125|GO:0032695|GO:0050728|GO:0032800|GO:0045893|GO:0051930	NM_010548	Mm.874	16153	58.4063	17.1399	6.32842	3.52644	49.2551	86.0039	39.96	19.5928	17.2497	14.5774	5.46566	7.33389	6.18572	3.86318	3.44834	3.26781
A_51_P415126	0.494898	0.614894	1.16882	up	NM_031199	chr6:86224838-86224897	Tgfa	Mus musculus transforming growth factor alpha (Tgfa), mRNA [NM_031199]	GO:0005154|GO:0008284|GO:0048471|GO:0005886|GO:0005634|GO:0005615|GO:0000187|GO:0016323|GO:0001948|GO:0007173|GO:0000165|GO:0051781|GO:0004708|GO:0050679|GO:0043066|GO:0009986|GO:0045741|GO:0048523|GO:0005576|GO:0045840|GO:0001525|GO:0031410|GO:0016020|GO:0006468|GO:0016021|GO:0008083|GO:0060749	NM_031199	Mm.137222	21802	105.471	159.772	6.98664	6.76159	204.799	54.9564	56.6587	139.057	185.808	154.451	7.57176	6.69408	6.69408	6.69111	6.89453	6.69911
A_52_P316474	0.400414	0.530601	1.42696	up	NM_009178	chr9:34854493-34854434	St3gal4	Mus musculus ST3 beta-galactoside alpha-2,3-sialyltransferase 4 (St3gal4), mRNA [NM_009178]	GO:0030173|GO:0008373|GO:0005794|GO:0016020|GO:0016757|GO:0047288|GO:0006486|GO:0016021|GO:0003836|GO:0016740	NM_009178	Mm.275973	20443	129.014	138.542	7.04636	6.53341	286.813	55.3053	44.9226	100.979	164.81	149.838	8.07443	6.70356	6.36108	6.22712	6.71528	6.65784
A_51_P104897	0.721127	0.801433	1.0585	up	NM_080553	chr17:27259102-27259161	Itpr3	Mus musculus inositol 1,4,5-triphosphate receptor 3 (Itpr3), mRNA [NM_080553]	GO:0005515|GO:0048471|GO:0060402|GO:0005886|GO:0005783|GO:0060291|GO:0005634|GO:0005635|GO:0051291|GO:0007204|GO:0030425|GO:0005640|GO:0070679|GO:0005737|GO:0043209|GO:0043025|GO:0006810|GO:0051260|GO:0006816|GO:0007613|GO:0006811|GO:0005262|GO:0005220|GO:0048016|GO:0005509|GO:0005730|GO:0045177|GO:0055085|GO:0050916|GO:0050917|GO:0000822|GO:0043235|GO:0005903|GO:0051592|GO:0043533|GO:0050913|GO:…	NM_080553	Mm.458106	16440	3469.61	5623.13	12.1245	12.0425	4414.41	2965.45	3028.98	7007	4771.02	5091.38	11.9516	12.1616	12.2605	12.413	11.7588	11.9558
A_55_P2020952	0.140482	0.267994	1.65061	up	NM_012045	chr4:138306507-138306448	Pla2g2f	Mus musculus phospholipase A2, group IIF (Pla2g2f), mRNA [NM_012045]	GO:0016042|GO:0006629|GO:0016787|GO:0005509|GO:0004623|GO:0005576|GO:0006644|GO:0046872	NM_012045	Mm.331989	26971	203.619	263.145	8.18564	7.46265	191.848	222.131	196.878	207.976	337.264	244.195	7.46478	8.63799	8.45417	7.26529	7.75764	7.36502
A_52_P121051	0.176107	0.307178	1.14866	up	NR_024619	chr6:13820211-13820152	2610001J05Rik	Mus musculus RIKEN cDNA 2610001J05 gene (2610001J05Rik), long non-coding RNA [NR_024619]	GO:0008150|GO:0003674|GO:0005575	NR_024619	Mm.29615	66520	1622.58	2503.2	11.038	10.8381	2299.14	1444.26	1124.33	2160.94	2922.51	2426.15	11.0361	11.1801	10.8977	10.6822	10.9958	10.8361
A_55_P2007955	0.0357484	0.124415	3.82024	up	NM_001177510	chr5:11922416-11922475	4933402N22Rik	Mus musculus RIKEN cDNA 4933402N22 gene (4933402N22Rik), mRNA [NM_001177510]	GO:0008150|GO:0003674|GO:0005575	NM_001177510	Mm.389066	545732	105.171	54.337	6.93404	5.00038	211.365	55.32	48.828	33.1895	32.4032	97.4182	7.61425	6.70407	6.48381	4.62639	4.35488	6.01987
A_55_P2135980	0.397522	0.528036	1.30812	up	NM_029499	chr19:11500839-11500898	Ms4a4c	Mus musculus membrane-spanning 4-domains, subfamily A, member 4C (Ms4a4c), mRNA [NM_029499]	GO:0008150|GO:0003674|GO:0005575	NM_029499	Mm.440715	64380	6814.41	9285.74	13.1161	12.7286	7308.09	5576.92	7558.23	6308.29	8622.68	12926.2	12.6677	13.0829	13.5978	12.2601	12.6149	13.311
A_55_P2080318	0.0804473	0.195804	1.31606	up	NM_172254	chr14:32894613-32894554	Dph3	Mus musculus diphthamine biosynthesis 3 (Dph3), transcript variant 1, mRNA [NM_172254]	GO:0005737|GO:0050709|GO:0051099|GO:0005634|GO:0046872	NM_172254	Mm.2519	105638	42.0837	66.8172	5.86114	5.46491	64.4175	33.1004	28.7333	49.0241	80.0627	71.3649	5.86696	6.00739	5.70907	5.17657	5.65698	5.56119
A_52_P47645	0.012391	0.0727169	1.35397	up	NM_016716	chr1:80268168-80268109	Cul3	Mus musculus cullin 3 (Cul3), mRNA [NM_016716]	GO:0031208|GO:0005515|GO:0031461|GO:0006511|GO:0005827|GO:0001831|GO:0004842|GO:0006513|GO:0007369|GO:0016567|GO:0035024|GO:0043149|GO:0017145|GO:0005634|GO:0048208|GO:0042803|GO:0000910|GO:0008054|GO:0040016|GO:0006810|GO:0016055|GO:0016192|GO:0031625|GO:0070062|GO:0000209|GO:0051322|GO:0005794|GO:0046982|GO:0032467|GO:0030332|GO:0001701|GO:0006888|GO:0000902|GO:0000139|GO:0016477|GO:0007229|GO:…	NM_016716	Mm.12665	26554	1581.06	2108.44	11.0294	10.5922	2072.79	1471.05	1199.34	1928.15	2300.23	2096.95	10.8903	11.2092	10.9888	10.5198	10.6344	10.6226
A_51_P374101	0.0148502	0.0794957	2.16485	up	NM_021409	chr2:167912863-167912922	Pard6b	Mus musculus par-6 family cell polarity regulator beta (Pard6b), mRNA [NM_021409]	GO:0005515|GO:0030054|GO:0005886|GO:0045177|GO:0005634|GO:0043234|GO:0005737|GO:0007049|GO:0006461|GO:0016020|GO:0005923|GO:0005938|GO:0070062|GO:0051301	NM_021409	Mm.292834	58220	57.6805	53.0769	6.219	5.10474	101.249	36.8842	34.9086	34.5982	68.4523	56.1801	6.52153	6.15307	5.98241	4.68255	5.42516	5.20651
A_51_P267783	0.943873	0.962918	1.03029	up	NM_008350	chr7:4724906-4724847	Il11	Mus musculus interleukin 11 (Il11), transcript variant 1, mRNA [NM_008350]	GO:0046888|GO:0033138|GO:0008284|GO:0005737|GO:0005142|GO:0045944|GO:0050731|GO:0005576|GO:0043410|GO:0008083|GO:0005615|GO:0005125	NM_008350	Mm.35814	16156	96.6271	135.418	6.56805	6.525	219.888	40.3347	29.6588	134.668	146.699	124.887	7.66703	6.27826	5.75886	6.64409	6.54735	6.38355
A_55_P2074521	0.00961841	0.0648512	1.54206	up	NM_054063	chr7:19007971-19007912	Psg28	Mus musculus pregnancy-specific glycoprotein 28 (Psg28), mRNA [NM_054063]	GO:0008150|GO:0003674|GO:0007565|GO:0005575	NM_054063	Mm.362025	114871	30.5345	41.2643	5.40158	4.77672	47.3689	21.1814	23.0533	32.6276	52.0601	39.1053	5.4123	5.38666	5.40578	4.59868	5.03918	4.69229
A_52_P214630	0.162249	0.29248	1.51309	up	NM_011448	chr11:112648809-112648868	Sox9	Mus musculus SRY (sex determining region Y)-box 9 (Sox9), mRNA [NM_011448]	GO:0005515|GO:0003700|GO:0003415|GO:0006366|GO:0008013|GO:0003705|GO:0003413|GO:0000981|GO:0007283|GO:0010564|GO:0003188|GO:0030155|GO:0030154|GO:0005622|GO:0007507|GO:0016337|GO:0014032|GO:0002063|GO:0001894|GO:0007173|GO:0030198|GO:0001942|GO:0000976|GO:0001708|GO:0030916|GO:0003170|GO:0006334|GO:0014068|GO:0030502|GO:0003179|GO:0001501|GO:0001502|GO:0001158|GO:0008284|GO:0008285|GO:0002683|GO:…	NM_011448	Mm.286407	20682	785.664	827.448	9.79157	9.19407	1533.42	356.776	466.791	743.787	864.162	874.394	10.4508	9.28149	9.64239	9.12286	9.17046	9.2889
A_55_P2054350	0.012342	0.0725655	3.18749	up	NM_173401	chr4:147527071-147527012	Fbxo44	Mus musculus F-box protein 44 (Fbxo44), transcript variant 1, mRNA [NM_173401]	GO:0008150|GO:0003674|GO:0019005	NM_173401	Mm.220327	230903	222.032	147.655	8.30182	6.62939	218.641	180.348	267.107	132.645	185.895	124.425	7.66058	8.35597	8.88889	6.61698	6.89614	6.37506
A_55_P2118234	0.16224	0.29248	1.58702	up	NR_033501	chr5:76945489-76945548	Gm7271	Mus musculus predicted gene 7271 (Gm7271), non-coding RNA [NR_033501]		NR_033501	Mm.478255	639545	24.6515	26.7202	4.83789	4.17157	48.7381	8.99517	16.2213	25.5198	31.0752	23.5656	5.45132	4.15109	4.91125	4.24246	4.29259	3.97964
A_55_P2379719	0.0500647	0.149112	2.51389	up	AK051463	chr5:90188893-90188834	D130050E23Rik	Mus musculus 12 days embryo spinal ganglion cDNA, RIKEN full-length enriched library, clone:D130050E23 product:hypothetical protein, full insert sequence. [AK051463]	GO:0008150|GO:0003674|GO:0005575		Mm.483761	100038413	13.8627	11.6929	4.34874	3.01882	13.7979	13.0381	14.7522	9.74562	18.1858	7.14713	3.57592	4.6991	4.7712	2.98106	3.52621	2.54919
A_55_P1976395	0.0344901	0.12186	1.76551	up	NM_010941	chrX:70203793-70203852	Nsdhl	Mus musculus NAD(P) dependent steroid dehydrogenase-like (Nsdhl), mRNA [NM_010941]	GO:0005811|GO:0006629|GO:0006695|GO:0006694|GO:0005783|GO:0003854|GO:0043231|GO:0016616|GO:0007224|GO:0047012|GO:0016020|GO:0060716|GO:0016491|GO:0016126|GO:0016021|GO:0001942|GO:0008202|GO:0055114|GO:0008203	NM_010941	Mm.38792	18194	142.722	153.206	7.51705	6.69697	250.358	98.2354	79.5729	176.008	140.348	143.261	7.86506	7.51599	7.17012	7.02243	6.47889	6.58959
A_55_P2124891	0.00106874	0.0314539	3.22182	up	NM_001093749	chr9:44882887-44882946	Mpzl3	Mus musculus myelin protein zero-like 3 (Mpzl3), mRNA [NM_001093749]	GO:0042633|GO:0016020|GO:0030198|GO:0016021|GO:0007155	NM_001093749	Mm.49611	319742	92.7822	57.7292	6.9689	5.28103	145.953	78.2108	54.183	59.8849	60.0487	53.254	7.07456	7.2023	6.62984	5.46566	5.24778	5.12964
A_55_P1991821	0.0269592	0.10667	2.26707	up	NM_001167891	chr18:36197945-36197886	Nrg2	Mus musculus neuregulin 2 (Nrg2), mRNA [NM_001167891]	GO:0005006|GO:0005154|GO:0007173|GO:0018108|GO:0043125	NM_001167891	Mm.380390	100042150	20.8053	19.7414	4.93009	3.74926	21.8111	19.6077	20.9972	19.8944	20.067	19.2629	4.25282	5.26801	5.26944	3.89125	3.67388	3.68264
A_51_P134923	0.811306	0.868677	1.09559	up	NM_027754	chr6:23603996-23603937	Rnf148	Mus musculus ring finger protein 148 (Rnf148), mRNA [NM_027754]	GO:0008150|GO:0003674|GO:0016020|GO:0008270|GO:0016021|GO:0005575|GO:0046872	NM_027754	Mm.443309	71300	25.6607	42.4819	4.95564	4.82393	44.6626	23.581	8.73864	50.5403	37.5673	39.3381	5.32549	5.52838	4.01304	5.22088	4.55115	4.69976
A_51_P262489	0.51779	0.635403	1.23217	up	NM_009215	chr16:23889835-23889776	Sst	Mus musculus somatostatin (Sst), mRNA [NM_009215]	GO:0030334|GO:0005179|GO:0043025|GO:0005576|GO:0005615	NM_009215	Mm.2453	20604	1808.92	2787.12	11.2471	10.9459	1733.03	1842.27	1851.47	1805.59	3885.26	2670.49	10.6274	11.5281	11.586	10.4263	11.4313	10.9802
A_55_P2145691	0.00612839	0.054601	1.52331	up	NM_139145	chr16:94352135-94352076	Hlcs	Mus musculus holocarboxylase synthetase (biotin- [propriony-Coenzyme A-carboxylase (ATP-hydrolysing)] ligase) (Hlcs), mRNA [NM_139145]	GO:0009305|GO:0008283|GO:0016874|GO:0071110|GO:0003824|GO:0016363|GO:0042803|GO:0005829|GO:0005739|GO:0005737|GO:0000166|GO:0018271|GO:0000785|GO:0004080|GO:0016570|GO:0005524|GO:0070781|GO:0008152|GO:0005652|GO:0009374|GO:0004078|GO:0004077|GO:0019899|GO:0004079|GO:0006464	NM_139145	Mm.30921	110948	67.3585	90.8598	6.54153	5.93431	100.998	46.4778	54.6	83.3804	85.5963	103.603	6.51696	6.46665	6.64097	5.94227	5.75305	6.10762
A_51_P407193	0.0980623	0.218353	1.23397	up	NM_133840	chr2:84564117-84564058	Clp1	Mus musculus CLP1, cleavage and polyadenylation factor I subunit (Clp1), mRNA [NM_133840]	GO:0006388|GO:0006397|GO:0030423|GO:0021695|GO:0031124|GO:0005634|GO:0000214|GO:0005524|GO:0035087|GO:0008033|GO:0046404|GO:0016310|GO:0000166|GO:0016301|GO:0005849|GO:0051736|GO:0051733|GO:0016740	NM_133840	Mm.21583	98985	241.284	376.085	8.30748	8.00418	397.855	168.572	157.425	309.316	431.178	387.761	8.52476	8.26545	8.13223	7.8445	8.1119	8.05612
A_52_P546660	0.0175817	0.0862936	2.57483	up	NM_183112	chr2:92223699-92223758	1700029I15Rik	Mus musculus RIKEN cDNA 1700029I15 gene (1700029I15Rik), mRNA [NM_183112]	GO:0008150|GO:0003674|GO:0005576|GO:0005575	NM_183112	Mm.330409	75641	299.531	246.335	8.73793	7.37345	322.334	273.124	303.135	308.973	236.251	193.781	8.2394	8.9178	9.05658	7.84266	7.24561	7.03208
A_55_P2026624	0.0970081	0.217018	1.43329	up		chr5:073784313-073784254							23683	29383.2	14.9476	14.4282	27897.8	18674.2	24477.1	31789.2	29309	27051.4	14.5577	14.9224	15.3627	14.5479	14.3877	14.3492
A_55_P2030775	0.943679	0.962789	1.01398	up	NM_001177648	chr2:30882013-30881954	Fnbp1	Mus musculus formin binding protein 1 (Fnbp1), transcript variant 3, mRNA [NM_001177648]	GO:0005515|GO:0005886|GO:0005575|GO:0031410|GO:0005764|GO:0006897|GO:0007399|GO:0008289|GO:0042802|GO:0005737|GO:0005905|GO:0016020|GO:0005856	NM_001177648	Mm.52297	14269	628.367	1161.68	9.70037	9.68034	862.832	413.694	608.574	852.785	1189.44	1442.81	9.61761	9.47802	10.0055	9.31889	9.6603	10.0618
A_55_P2112637	0.886867	0.923734	1.11414	up	AK132407	chr19:56395251-56395310	Habp2	hyaluronic acid binding protein 2 [Source:MGI Symbol;Acc:MGI:1196378] [ENSMUST00000095948]	GO:0016787|GO:0004252|GO:0006508|GO:0008236|GO:0008233|GO:0005576|GO:0003824		Mm.25791	226243	29.7215	26.8977	4.33978	4.18385	72.2622	5	11.9025	30.8227	26.5585	23.312	6.0395	2.53038	4.44945	4.52027	4.06873	3.96254
A_55_P2231244	0.057948	0.162081	1.37447	up	NM_008498	chr11:84335594-84335442	Lhx1	Mus musculus LIM homeobox protein 1 (Lhx1), mRNA [NM_008498]	GO:0005515|GO:0010468|GO:0007389|GO:0001657|GO:0003700|GO:0006366|GO:0001655|GO:0048703|GO:0009791|GO:0072077|GO:0009653|GO:0030154|GO:0009880|GO:0005622|GO:0035846|GO:0035847|GO:0048646|GO:0072178|GO:0035849|GO:0001705|GO:0001706|GO:0021937|GO:0007275|GO:0010842|GO:0021549|GO:0072049|GO:0001702|GO:0021871|GO:2000768|GO:0043234|GO:0008045|GO:0035852|GO:0072050|GO:0072001|GO:0008270|GO:0045893|GO:…	NM_008498	Mm.4965	16869	27.8744	42.7481	5.28209	4.82322	42.242	20.3581	21.0231	36.0874	56.3051	35.8517	5.24448	5.33032	5.27148	4.74076	5.15432	4.57458
A_55_P2051479	0.442437	0.569487	1.15731	up		chr3:037498924-037498865							1379.86	2206.06	10.8608	10.6501	1541.61	1203.87	1394.09	1820.62	2642.15	2155.4	10.458	10.9222	11.2024	10.4397	10.8514	10.6591
A_55_P2152672	0.150508	0.279786	2.28682	up	XM_006496398	chr1:54501697-54501638	LOC102637189	PREDICTED: Mus musculus uncharacterized LOC102637189 (LOC102637189), mRNA [XM_006496398]		XM_006496398		102637189	27.5388	15.7884	4.6145	3.42116	66.2611	8.02804	8.32714	16.5721	18.8041	11.9891	5.91097	3.98348	3.94905	3.61646	3.58041	3.06659
A_51_P450406	0.00946142	0.0643648	3.18387	up	XM_006504541	chr5:137610914-137610855	Muc3	mucin 3, intestinal [Source:MGI Symbol;Acc:MGI:1203527] [ENSMUST00000160630]	GO:0008150|GO:0016324|GO:0005737	XM_006504541	Mm.7184	666339	58564.7	31709.2	16.1429	14.4722	96837.2	42706.8	36150	19888.4	46361.4	28877.6	16.209	16.2217	15.9981	13.8795	15.0902	14.4468
A_51_P440743	0.0554942	0.158283	2.02333	up	NM_009886	chr15:85729440-85729381	Celsr1	Mus musculus cadherin, EGF LAG seven-pass G-type receptor 1 (flamingo homolog, Drosophila) (Celsr1), mRNA [NM_009886]	GO:0005515|GO:0001736|GO:0005886|GO:0007267|GO:0005634|GO:0007266|GO:0009952|GO:0042249|GO:0005622|GO:0007218|GO:0032956|GO:0046983|GO:0007626|GO:0004871|GO:0007155|GO:0001942|GO:0007156|GO:0060490|GO:0042472|GO:0004930|GO:0090251|GO:0005509|GO:0090179|GO:0046928|GO:0001843|GO:0045176|GO:0007275|GO:0007417|GO:0001702|GO:0007165|GO:0016020|GO:0007186|GO:0005887|GO:0060489|GO:0060488|GO:0042060|GO:…	NM_009886	Mm.22680	12614	431.19	436.49	9.21267	8.19594	489.673	469.672	334.226	537.073	310.544	461.853	8.80583	9.63835	9.19384	8.63609	7.63758	8.31415
A_55_P2168048	0.349806	0.484107	1.3953	up	NM_001205353	chr15:85967592-85967651	Gramd4	Mus musculus GRAM domain containing 4 (Gramd4), transcript variant 2, mRNA [NM_001205353]	GO:0005739|GO:0008150|GO:0003674|GO:0016020|GO:0006915|GO:0016021|GO:0005575	NM_001205353	Mm.24442	223752	110.846	172.437	7.31452	6.83395	100.065	107.533	124.94	118.598	219.765	178.948	6.50808	7.63334	7.80214	6.45057	7.14441	6.90686
A_55_P2113539	0.0796942	0.19466	1.56865	up		chr8:004778429-004778488							89.4025	122.274	7.01891	6.36939	98.0532	85.5641	84.5904	108.064	141.912	116.846	6.48043	7.32716	7.24914	6.32069	6.49904	6.28843
A_55_P1958419	0.125891	0.251076	1.18915	up		chr8:082634181-082634122							4456.34	6279.81	12.4711	12.2212	5969.81	4057.36	3341.85	7130.67	6007.53	5701.24	12.3932	12.6128	12.4074	12.4377	12.105	12.1208
A_51_P401987	0.000440617	0.0255982	6.35139	up	NM_019432	chr1:121964169-121964110	Tmem37	Mus musculus transmembrane protein 37 (Tmem37), mRNA [NM_019432]	GO:0005262|GO:0005244|GO:0016020|GO:0070588|GO:0006810|GO:0034765|GO:0006816|GO:0016021|GO:0006811	NM_019432	Mm.24750	170706	21854.7	6115.67	14.8437	12.1766	24682.5	21239.8	19641.9	6997.7	5664.64	5684.66	14.4074	15.0979	15.0259	12.4105	12.0036	12.1158
A_52_P304991	0.129135	0.255231	1.50181	up	NM_206823	chr2:87372302-87372361	Olfr153	Mus musculus olfactory receptor 153 (Olfr153), mRNA [NM_206823]	GO:0050911|GO:0007608|GO:0007165|GO:0004984|GO:0016020|GO:0007186|GO:0005886|GO:0004930|GO:0016021|GO:0004871|GO:0050896	NM_206823	Mm.424751	110511	13.1927	19.0199	4.24924	3.66254	15.4393	10.0808	14.058	15.6365	23.4406	17.9827	3.72214	4.32824	4.69733	3.5205	3.89568	3.57143
A_66_P117543	0.167125	0.297566	1.23173	up		chrX:038646944-038646885							131.85	213.813	7.49256	7.19187	197.629	112.624	85.2966	232.649	205.26	203.531	7.51364	7.70321	7.26083	7.43749	7.03835	7.09979
A_66_P135192	0.152091	0.281299	1.231	up	NM_001100451	chr9:101005796-101005855	Msl2	Mus musculus male-specific lethal 2 homolog (Drosophila) (Msl2), mRNA [NM_001100451]	GO:0003674|GO:0043984|GO:0016874|GO:0072487|GO:0008270|GO:0046872	NM_001100451	Mm.326206	77853	466.027	705.42	9.23412	8.93428	756.229	306.507	335.344	546	800.372	769.889	9.42498	9.07687	9.2005	8.6642	9.04489	9.09376
A_51_P483220	0.0844521	0.201288	1.49567	up	NM_008378	chr18:13151172-13151231	Impact	Mus musculus impact, RWD domain protein (Impact), mRNA [NM_008378]	GO:0005515|GO:0005737|GO:0006446|GO:0001933|GO:0006417	NM_008378	Mm.8154	16210	772.245	903.36	9.89817	9.31738	1303.41	438.23	575.092	704.49	934.025	1071.56	10.219	9.54911	9.92641	9.04489	9.29367	9.61358
A_55_P1958951	0.0225475	0.0976481	1.86769	up	XR_140605	chr3:79376385-79376444		RIKEN cDNA 4930589L23 gene [Source:MGI Symbol;Acc:MGI:1923129] [ENSMUST00000091023]		XR_140605	Mm.410800		29.7609	34.3421	5.43463	4.53338	34.9803	25.1685	29.134	32.3648	38.6821	31.9794	4.95399	5.61892	5.73099	4.58691	4.59819	4.41502
A_55_P1953377	0.0115851	0.0705148	2.00399	up		chr8:074048674-074048733							23792.3	20103.6	14.8737	13.8709	33650.6	22162.8	15563.5	24848	19608.8	15853.9	14.8125	15.1448	14.664	14.1959	13.8317	13.5851
A_55_P2142226	0.154074	0.28357	1.51514	up	NM_001168294	chr12:105492556-105492615	Serpina3f	Mus musculus serine (or cysteine) peptidase inhibitor, clade A, member 3F (Serpina3f), transcript variant 1, mRNA [NM_001168294]	GO:0030162|GO:0010951|GO:0004867|GO:0010466|GO:0043434|GO:0005576|GO:0034097|GO:0030414|GO:0005615	NM_001168294	Mm.483584	238393	1000.73	1068.16	10.1744	9.57493	1868.11	526.044	608.031	1254.74	906.775	1042.96	10.727	9.79158	10.0045	9.90908	9.24728	9.56842
A_55_P1971074	0.52336	0.640175	1.07145	up	NM_015804	chr8:12868669-12868728	Atp11a	Mus musculus ATPase, class VI, type 11A (Atp11a), mRNA [NM_015804]	GO:0000287|GO:0005886|GO:0005783|GO:0005765|GO:0005524|GO:0046872|GO:0019829|GO:0000166|GO:0015914|GO:0016020|GO:0016787|GO:0004012|GO:0016021|GO:0055037|GO:0006812|GO:0005768	NM_015804	Mm.257837	50770	396.899	725.278	9.09463	8.99506	525.051	342.646	323	750.883	669.937	755.013	8.91079	9.2251	9.14799	9.13686	8.78616	9.06216
A_52_P645862	0.647152	0.741245	1.15833	up	NM_177322	chr13:30474638-30474697	Agtr1a	Mus musculus angiotensin II receptor, type 1a (Agtr1a), mRNA [NM_177322]	GO:0005515|GO:0043627|GO:0004945|GO:0019722|GO:0043621|GO:0006885|GO:0001991|GO:0019229|GO:0007507|GO:0043524|GO:0002019|GO:0002018|GO:0051482|GO:0031968|GO:0005794|GO:0046982|GO:0019901|GO:0004930|GO:0002035|GO:0038166|GO:0032270|GO:0007186|GO:0001596|GO:0042976|GO:0008284|GO:0005886|GO:0002001|GO:0010873|GO:0007200|GO:0050715|GO:0007266|GO:0045777|GO:0007204|GO:0030425|GO:0032430|GO:0042416|GO:…	NM_177322	Mm.35062	11607	81.9843	127.264	6.64038	6.42833	142.243	28.332	75.3785	118.81	143.267	119.717	7.03671	5.79057	7.09387	6.4549	6.51308	6.31702
A_55_P2182700	0.0680387	0.177745	3.48097	up	NM_031869	chr5:116464709-116464650	Prkab1	Mus musculus protein kinase, AMP-activated, beta 1 non-catalytic subunit (Prkab1), mRNA [NM_031869]	GO:0005515|GO:0006629|GO:0031588|GO:0004679|GO:0019901|GO:0005634|GO:0051291|GO:0010628|GO:0043234|GO:0016310|GO:0050790|GO:0004672|GO:0016301|GO:0006631|GO:0006468|GO:0006633|GO:0016740	NM_031869	Mm.458152	19079	1876.56	681.884	10.6361	8.83666	4403.11	736.421	490.156	515.782	985.72	544.15	11.947	10.2498	9.71165	8.58018	9.37226	8.55753
A_55_P2278965	0.00190603	0.0358776	1.63462	up	AK017326	chr3:51875612-51875553	5430420F09Rik	Mus musculus 6 days neonate head cDNA, RIKEN full-length enriched library, clone:5430420F09 product:unclassifiable, full insert sequence. [AK017326]			Mm.394303	74491	24.4238	31.4156	5.10024	4.39128	36.0067	17.4938	19.7708	25.4075	36.6674	32.1719	5.00201	5.11969	5.17901	4.23458	4.51471	4.42455
A_55_P2039601	0.272502	0.408449	1.13942	up	NM_001130149	chr15:12864964-12865023	Drosha	Mus musculus drosha, ribonuclease type III (Drosha), transcript variant 1, mRNA [NM_001130149]	GO:0005515|GO:0010468|GO:0006396|GO:0016075|GO:0042254|GO:0003723|GO:0005634|GO:0004521|GO:0046872|GO:0010586|GO:0004518|GO:0004519|GO:0004525|GO:0016787|GO:0031054|GO:0031053	NM_001130149	Mm.293142	14000	738.555	1202.76	9.95222	9.76393	948.154	691.325	576.186	1265.91	1273.59	1068.79	9.76228	10.1657	9.92872	9.92154	9.76308	9.60716
A_55_P1974602	0.000232291	0.0227684	3.7982	up	NM_001042557	chr8:4245752-4245811	Map2k7	Mus musculus mitogen-activated protein kinase kinase 7 (Map2k7), transcript variant 1, mRNA [NM_001042557]	GO:0005515|GO:0005634|GO:0051403|GO:0046872|GO:0005829|GO:0005737|GO:0043525|GO:0000166|GO:0016301|GO:0004708|GO:0016772|GO:0000287|GO:0019901|GO:0019903|GO:0006950|GO:0007254|GO:0006915|GO:0031435|GO:0007257|GO:0008022|GO:0005524|GO:0016310|GO:0004672|GO:0008545|GO:0004674|GO:0001934|GO:0006468|GO:0004713|GO:0016740	NM_001042557	Mm.3906	26400	21.1599	10.8489	4.90886	2.98355	30.183	18.1453	15.1515	8.42306	12.8105	11.3131	4.74124	5.17266	4.81269	2.84267	3.10197	3.00601
A_51_P316935	6.30291e-05	0.0173213	13.3548	up	NM_145980	chr6:116602564-116602623	8430408G22Rik	Mus musculus RIKEN cDNA 8430408G22 gene (8430408G22Rik), transcript variant 1, mRNA [NM_145980]	GO:0005739|GO:0008150|GO:0003674	NM_145980	Mm.38231	213393	550.13	82.9619	9.54295	5.80366	716.495	428.964	504.933	96.455	78.9182	73.5126	9.35475	9.52235	9.75174	6.16416	5.63906	5.60775
A_51_P244690	0.000119321	0.0191083	1.47529	up	NM_009458	chr11:51800217-51800158	Ube2b	Mus musculus ubiquitin-conjugating enzyme E2B (Ube2b), mRNA [NM_009458]	GO:0005515|GO:0006344|GO:0006511|GO:0004842|GO:0000790|GO:0006513|GO:0016567|GO:0033522|GO:0005886|GO:0033503|GO:0016874|GO:0005657|GO:0007288|GO:0005634|GO:0007283|GO:0006301|GO:0070534|GO:0005737|GO:0000166|GO:0070193|GO:0060070|GO:0000785|GO:0009411|GO:0043951|GO:0031625|GO:0001741|GO:0000209|GO:0043066|GO:0016881|GO:0042493|GO:0070076|GO:0010845|GO:0050821|GO:0031056|GO:0005524|GO:0001701|GO:…	NM_009458	Mm.384918	22210	5268.36	5926.07	12.7037	12.1427	7321.14	4281.06	4202.88	5574.21	6444.13	5759.86	12.6697	12.7044	12.737	12.09	12.2015	12.1365
A_55_P2148921	0.222357	0.356968	1.36651	up	NM_033327	chr8:90210388-90210329	Zfp423	Mus musculus zinc finger protein 423 (Zfp423), mRNA [NM_033327]	GO:0005515|GO:0006355|GO:0046982|GO:0005634|GO:0007275|GO:0003676|GO:0003677|GO:0046872|GO:0006351|GO:0030154|GO:0042803|GO:0007399|GO:0043565|GO:0030513|GO:0007219|GO:0045893|GO:0045892	NM_033327	Mm.23452	94187	15.1345	24.1277	4.46667	4.01617	17.3206	12.4765	15.6065	21.095	29.9991	21.289	3.90521	4.63739	4.8574	3.97311	4.24327	3.83214
A_51_P108489	0.812258	0.869274	1.01855	up	NM_008187	chr8:97945043-97944518	Gtl3	Mus musculus gene trap locus 3 (Gtl3), mRNA [NM_008187]	GO:0005929|GO:0070062	NM_008187	Mm.2080	14894	513.638	954.949	9.43957	9.41305	693.188	388.279	459.446	935.716	1041.1	888.034	9.30713	9.39181	9.61976	9.46006	9.46006	9.31906
A_51_P278018	0.361784	0.495208	1.07448	up	NM_027338	chr8:23317324-23318373	Vps36	Mus musculus vacuolar protein sorting 36 (yeast) (Vps36), mRNA [NM_027338]	GO:0043130|GO:0006355|GO:0005770|GO:0005623|GO:0005634|GO:0032266|GO:0015031|GO:0005764|GO:0006351|GO:0008289|GO:0005622|GO:0005737|GO:0016020|GO:0016197|GO:0006810|GO:0070062|GO:0005768	NM_027338	Mm.41453	70160	2177.52	3544.51	11.471	11.3674	2852.84	2009.64	1670.08	3684.27	3577.57	3371.68	11.3345	11.6351	11.4435	11.4651	11.307	11.3301
A_51_P103780	0.00439176	0.0476445	1.61527	up	NM_145512	chr1:167104788-167104729	Sft2d2	Mus musculus SFT2 domain containing 2 (Sft2d2), mRNA [NM_145512]	GO:0008150|GO:0003674|GO:0016020|GO:0006810|GO:0016021|GO:0016192|GO:0015031|GO:0070062	NM_145512	Mm.288369	108735	4053.8	4067.45	12.2665	11.5748	6352.34	3029.24	2779.82	3728.56	4324.7	4149.1	12.4844	12.1834	12.1318	11.4866	11.5948	11.6428
A_55_P2086153	0.0888632	0.206524	1.24992	up	NM_029236	chr15:99300584-99300525	Bcdin3d	Mus musculus BCDIN3 domain containing (Bcdin3d), mRNA [NM_029236]	GO:0005737|GO:0001510|GO:2000632|GO:0008168|GO:0005634|GO:0032259|GO:0008171|GO:0016740|GO:0010586|GO:0008173	NM_029236	Mm.32826	75284	220.567	358.567	8.24447	7.92263	324.391	179.841	157.471	275.759	435.743	364.199	8.24858	8.35185	8.13299	7.68306	8.12626	7.95858
A_51_P106952	0.0366674	0.126014	1.32934	up	NM_134077	chr14:105514008-105513949	Rbm26	Mus musculus RNA binding motif protein 26 (Rbm26), mRNA [NM_134077]	GO:0006397|GO:0000166|GO:0010923|GO:0003723|GO:0005575|GO:0003676|GO:0046872	NM_134077	Mm.474531	74213	1930.62	2620.9	11.3269	10.9162	2356.33	1763.15	1672.37	2584.27	2622.61	2655.82	11.0725	11.4624	11.4458	10.9392	10.8407	10.9687
A_51_P261001	0.919239	0.946262	1.01335	up	NM_013827	chr5:108537924-108537983	Mtf2	Mus musculus metal response element binding transcription factor 2 (Mtf2), transcript variant 1, mRNA [NM_013827]	GO:0005515|GO:0061087|GO:0007379|GO:0061086|GO:0005634|GO:0000122|GO:0035064|GO:0003677|GO:0046872|GO:0048863|GO:0005737|GO:0035098|GO:0019827|GO:0045944|GO:0008270|GO:0016568	NM_013827	Mm.257149	17765	199.529	409.407	8.15349	8.13435	249.618	169.387	179.583	421.273	383.992	422.957	7.86106	8.27259	8.32682	8.27621	7.94372	8.18311
A_51_P120093	0.00334855	0.0433778	4.72143	up	NM_028035	chr6:51540112-51540171	Snx10	Mus musculus sorting nexin 10 (Snx10), transcript variant 1, mRNA [NM_028035]	GO:0005813|GO:0005783|GO:0030316|GO:0005634|GO:0015031|GO:0006886|GO:0008289|GO:0042384|GO:0005545|GO:0005737|GO:0016020|GO:0031313|GO:0030030|GO:0071539|GO:0006810|GO:0051117|GO:0007032|GO:0035091|GO:0005856|GO:0005768	NM_028035	Mm.294166	71982	1629.4	561.91	10.84	8.60074	3047.39	1088.28	752.527	625.587	486.932	573.212	11.4212	10.7767	10.322	8.86424	8.30048	8.63749
A_55_P2362635	0.321223	0.456345	1.49538	up	XM_006517022	chr13:74306830-74306889	Slc9a3	PREDICTED: Mus musculus solute carrier family 9 (sodium/hydrogen exchanger), member 3 (Slc9a3), transcript variant X2, mRNA [XM_006517022]	GO:0015385|GO:0005886|GO:0031988|GO:0031526|GO:0030165|GO:0006885|GO:0006898|GO:0005903|GO:0016324|GO:0015297|GO:0016020|GO:0002028|GO:0006810|GO:0035725|GO:0016021|GO:0006814|GO:0070062|GO:0006811	XM_006517022	Mm.261564	105243	7448.97	7890.41	13.0041	12.4236	13870.2	4450.05	4026.65	12742.5	6023.38	4905.35	13.5791	12.7596	12.6737	13.2637	12.1088	11.8984
A_55_P2065716	0.957053	0.971669	1.01982	up	NM_008133	chr14:35157289-35157348	Glud1	Mus musculus glutamate dehydrogenase 1 (Glud1), mRNA [NM_008133]	GO:0005515|GO:0006520|GO:0006537|GO:0006538|GO:0070728|GO:0005743|GO:0070403|GO:0010044|GO:0005525|GO:0005524|GO:0004352|GO:0005739|GO:0004353|GO:0005737|GO:0072350|GO:0043531|GO:0000166|GO:0016491|GO:0032024|GO:0019899|GO:0055114|GO:0006541	NM_008133	Mm.10600	14661	3395.5	5987.93	12.1107	12.0824	2898.17	3730.35	3557.97	3640.32	7362.59	6960.87	11.3557	12.4882	12.4882	11.4445	12.3976	12.405
A_55_P2166833	0.249725	0.385709	1.39384	up	XM_006527509	chr19:11376043-11375984	Ms4a14	PREDICTED: Mus musculus membrane-spanning 4-domains, subfamily A, member 14 (Ms4a14), transcript variant X1, mRNA [XM_006527509]	GO:0008150|GO:0003674|GO:0005575	XM_006527509		383435	23.0702	27.8041	4.71958	4.24052	47.2935	9.58242	12.3346	27.0121	29.654	26.7461	5.40998	4.24411	4.50465	4.32261	4.22939	4.16956
A_51_P337662	0.138894	0.265902	1.27474	up	NM_172779	chrX:53760732-53760791	Ddx26b	Mus musculus DEAD/H (Asp-Glu-Ala-Asp/His) box polypeptide 26B (Ddx26b), mRNA [NM_172779]	GO:0008150|GO:0003674|GO:0005575	NM_172779	Mm.474772	236790	346.099	539.949	8.88704	8.53684	473.948	243.69	320.659	460.156	513.16	646.529	8.75979	8.76602	9.13531	8.41005	8.37691	8.82354
A_55_P2133901	0.249334	0.385307	1.35135	up	CJ238707	chr17:24858205-24858584		predicted pseudogene 5786 [Source:MGI Symbol;Acc:MGI:3645003] [ENSMUST00000085368]			Mm.390980		13956	17839.7	14.1742	13.7398	13634.2	12940	15293.9	17569.8	18660.2	17289.1	13.5531	14.3348	14.6348	13.7387	13.7573	13.7235
A_55_P2378129	0.317227	0.452129	1.29607	up	BM937886	chr11:78503111-78503170	D11Ertd80e	UI-M-CC1-bae-a-04-0-UI.r1 NIH_BMAP_Ret1_N Mus musculus cDNA clone UI-M-CC1-bae-a-04-0-UI 5', mRNA sequence [BM937886]			Mm.441312	52473	59.382	96.5686	6.31222	5.93807	98.383	39.6196	40.1436	55.6244	137.618	96.463	6.48576	6.25715	6.19375	5.36075	6.44702	6.00646
A_52_P118958	0.0178083	0.087042	1.34477	up	NM_023041	chr1:174065081-174065140	Pex19	Mus musculus peroxisomal biogenesis factor 19 (Pex19), transcript variant 1, mRNA [NM_023041]	GO:0005515|GO:0072663|GO:0006625|GO:0050821|GO:0045046|GO:0005634|GO:0031526|GO:0043231|GO:0036105|GO:0005829|GO:1900131|GO:0043234|GO:0005737|GO:0047485|GO:0061077|GO:0016020|GO:0051117|GO:0007031|GO:0072321|GO:0016021|GO:0016557|GO:0005778|GO:0005777|GO:0016559	NM_023041	Mm.247764	19298	1553.22	2063.61	10.9842	10.5568	2164.54	1124.03	1371.09	1924.67	2302.36	1963.81	10.9536	10.8234	11.1756	10.5178	10.6355	10.5172
A_52_P39157	0.097262	0.217362	1.14449	up	NM_007552	chr2:18607987-18608046	Bmi1	Mus musculus Bmi1 polycomb ring finger oncogene (Bmi1), mRNA [NM_007552]	GO:0005515|GO:0000792|GO:0048103|GO:0004842|GO:0030890|GO:2001234|GO:0048706|GO:0000151|GO:0048704|GO:0005634|GO:0046872|GO:0005737|GO:0006959|GO:0021903|GO:0031519|GO:0006355|GO:0016573|GO:0009987|GO:0016574|GO:0000122|GO:0001701|GO:0006351|GO:0033092|GO:0043565|GO:0016604|GO:0001501|GO:0007420|GO:0003682|GO:0008270|GO:0016568	NM_007552	Mm.289584	12151	163.85	288.285	7.82498	7.63027	240.734	130.016	120.801	294.023	279.575	291.258	7.80635	7.90857	7.76002	7.76926	7.49605	7.62549
A_55_P2014149	0.16397	0.294096	1.21525	up		chr4:034011596-034011537							43.2024	73.8648	5.91232	5.63107	62.6433	26.5905	40.3734	64.0543	86.7536	70.7866	5.82496	5.70922	6.20279	5.57093	5.7733	5.54899
A_51_P106591	0.0336235	0.120277	1.95071	up	NM_172434	chr3:94295991-94296049	Celf3	Mus musculus CUGBP, Elav-like family member 3 (Celf3), transcript variant 2, mRNA [NM_172434]	GO:0048026|GO:0008380|GO:0006397|GO:0005737|GO:0000166|GO:0000381|GO:0003723|GO:0005634|GO:0030317|GO:0007283|GO:0003676	NM_172434	Mm.44292	78784	27.462	30.5778	5.33615	4.37215	30.1517	26.966	25.2685	27.7406	32.3543	31.6384	4.7398	5.72799	5.54066	4.36215	4.35288	4.40143
A_55_P2180789	0.231931	0.367083	1.3798	up	NM_021523	chrX:148369375-148369434	Huwe1	Mus musculus HECT, UBA and WWE domain containing 1 (Huwe1), mRNA [NM_021523]	GO:0000209|GO:0004842|GO:0006513|GO:0016574|GO:0016874|GO:0005634|GO:0003677|GO:0006974|GO:0030154|GO:0005737|GO:0006281|GO:0042787|GO:0006284|GO:0070062	NM_021523	Mm.27372	59026	4015.24	5020.7	12.3622	11.8977	3760.82	4365.69	3919.21	5174.61	4863.73	5023.76	11.7156	12.7321	12.6389	11.9804	11.7812	11.9317
A_55_P1988009	0.809997	0.867705	1.07731	up	XM_006518196	chr14:4850203-4850262	Gm3252	PREDICTED: Mus musculus predicted gene 3252 (Gm3252), transcript variant X3, mRNA [XM_006518196]		XM_006518196		100041283	161.912	322.294	7.85551	7.74808	155.136	189.593	141.007	234.211	430.075	302.596	7.15929	8.42684	7.98041	7.44718	8.10771	7.68935
A_51_P109369	0.00778303	0.0596607	2.72605	up	NM_026346	chr15:58011811-58011752	Fbxo32	Mus musculus F-box protein 32 (Fbxo32), mRNA [NM_026346]	GO:0005515|GO:0030018|GO:0005737|GO:0014878|GO:0014889|GO:0005730|GO:0005634|GO:0014894|GO:0071549	NM_026346	Mm.25683	67731	106.485	83.8978	7.25667	5.80986	120.17	111.263	88.0233	65.2608	87.3468	99.0859	6.78096	7.68515	7.3039	5.59984	5.78238	6.04736
A_51_P101635	0.869495	0.911582	1.02506	up	NM_019719	chr17:25967885-25967826	Stub1	Mus musculus STIP1 homology and U-Box containing protein 1 (Stub1), mRNA [NM_019719]	GO:0005515|GO:0006511|GO:0004842|GO:0016567|GO:0005886|GO:0016874|GO:0034450|GO:0051879|GO:0032436|GO:0000151|GO:0046332|GO:0005634|GO:0042803|GO:0051787|GO:0051604|GO:0070534|GO:0005737|GO:0006457|GO:0090035|GO:0031072|GO:0031398|GO:0045111|GO:0019900|GO:0030579|GO:0030674|GO:0071218|GO:0031625|GO:0000209|GO:0031371|GO:0030911|GO:0006974|GO:0051865|GO:0006281|GO:0030544|GO:0043161|GO:0006515|GO:…	NM_019719	Mm.491120	56424	1789.45	3166.11	11.2157	11.18	2180.03	1440.27	1748.04	2577.89	3715.9	3204.53	10.9619	11.1744	11.5107	10.9346	11.3577	11.2476
A_55_P2264231	0.0568953	0.160539	1.47512	up	AK046028	chr1:5148366-5148425	B230334L07Rik	Mus musculus adult male corpora quadrigemina cDNA, RIKEN full-length enriched library, clone:B230334L07 product:unclassifiable, full insert sequence. [AK046028]			Mm.439113	320384	54.9866	80.6502	6.31161	5.75078	69.5622	46.0508	49.3469	61.1165	96.4	84.434	5.97972	6.45585	6.49925	5.49754	5.93253	5.82226
A_52_P193925	0.0245174	0.101856	1.40125	up	NM_028072	chr2:165899726-165899667	Sulf2	Mus musculus sulfatase 2 (Sulf2), transcript variant 2, mRNA [NM_028072]	GO:0006790|GO:0005886|GO:0051216|GO:0005783|GO:0048706|GO:0030177|GO:0008449|GO:0008484|GO:0003824|GO:0005615|GO:0032836|GO:0046872|GO:0002063|GO:0004065|GO:0030201|GO:0005794|GO:0009986|GO:0001822|GO:0005509|GO:0035860|GO:0010575|GO:0060384|GO:0060348|GO:0016787|GO:0003094|GO:0008152|GO:0040037|GO:0014846	NM_028072	Mm.1011	72043	2320.32	2874.03	11.522	11.0353	3440.66	1847.98	1672.33	2319.34	3400.77	2901.97	11.5895	11.531	11.4456	10.7804	11.2218	11.1037
A_55_P1973299	0.11408	0.2369	2.3982	up	NM_016700	chr14:34195333-34195274	Mapk8	Mus musculus mitogen-activated protein kinase 8 (Mapk8), mRNA [NM_016700]	GO:0097300|GO:0010468|GO:0005515|GO:0042542|GO:0070301|GO:0009408|GO:0071732|GO:0031175|GO:0004705|GO:0000166|GO:0018105|GO:0016301|GO:0018107|GO:0009411|GO:0004707|GO:0016772|GO:0035033|GO:0030335|GO:0045740|GO:0016310|GO:0001503|GO:0046686|GO:0032091|GO:0030424|GO:0042826|GO:2001235|GO:0005634|GO:0032839|GO:0005829|GO:0005739|GO:0032880|GO:0005737|GO:0006954|GO:0043204|GO:0006355|GO:0031116|GO:…	NM_016700	Mm.21495	26419	311.823	315.07	8.75411	7.49216	431.074	250.187	254.208	104.036	487.497	353.677	8.64101	8.80048	8.82084	6.26582	8.30144	7.90921
A_55_P2130839	0.0200218	0.0919489	2.44424	up	XM_006543695	chr2:150149769-150150908	LOC102633750	PREDICTED: Mus musculus zinc finger protein 14-like (LOC102633750), partial mRNA [XM_006543695]		XM_006543695		102633750	35.9838	30.8752	5.64664	4.35725	46.2637	40.6778	21.01	23.9485	37.4327	31.2445	5.37804	6.2914	5.27047	4.14393	4.5456	4.38222
A_55_P2006210	0.0869244	0.204179	1.19233	up	AK008922	chr10:79221282-79221341	Fgf22	Mus musculus adult male stomach cDNA, RIKEN full-length enriched library, clone:2210414E06 product:FIBROBLAST GROWTH FACTOR-22 PRECURSOR (FGF-22) homolog [Mus musculus], full insert sequence. [AK008922]	GO:0005515|GO:0005794|GO:0009986|GO:0005730|GO:0005102|GO:0005576|GO:0008083		Mm.154211	67112	28.9445	48.9913	5.29943	5.04565	46.8047	18.4899	21.539	50.8727	47.8504	48.2508	5.39667	5.19761	5.30402	5.23469	4.91659	4.98566
A_55_P1967483	0.730974	0.808706	1.06777	up		chr2:024350964-024351023							1715.8	2691.27	11.0429	10.9483	2728.13	932.962	1486.3	2315	2863.36	2895.46	11.273	10.5658	11.2899	10.7768	10.9664	11.1017
A_51_P362054	0.702085	0.786915	1.03739	up	NM_025983	chr2:174286715-174286656	Atp5e	Mus musculus ATP synthase, H+ transporting, mitochondrial F1 complex, epsilon subunit (Atp5e), mRNA [NM_025983]	GO:0015986|GO:0006200|GO:0005743|GO:0005753|GO:0005739|GO:0006754|GO:0008553|GO:0016020|GO:0016787|GO:0046961|GO:0046933|GO:0045261|GO:0006810|GO:0000275|GO:0006811|GO:0015992	NM_025983	Mm.20841	67126	13443.4	22118.8	14.0911	14.0382	17028.3	12631	10670.9	22719.6	23592.2	20044.7	13.8747	14.2879	14.1108	14.078	14.0932	13.9433
A_55_P1988384	0.616361	0.716674	1.26671	up	NM_007515	chrX:98274703-98274644	Slc7a3	Mus musculus solute carrier family 7 (cationic amino acid transporter, y+ system), member 3 (Slc7a3), mRNA [NM_007515]	GO:0015326|GO:0032006|GO:0005886|GO:0006865|GO:0003333|GO:0015822|GO:0016020|GO:0015171|GO:0005887|GO:0015181|GO:0006810|GO:0016021|GO:0000064|GO:0015809|GO:0015189|GO:0015819	NM_007515	Mm.5140	11989	23.0919	35.3696	4.789	4.44791	44.6637	15.0976	9.51451	53.6409	17.9077	34.5601	5.3259	4.90665	4.13445	5.31324	3.50576	4.52474
A_51_P138807	0.0241955	0.101109	1.7832	up	AK006001	chr2:164569663-164569604		WAP four-disulfide core domain 3 [Source:MGI Symbol;Acc:MGI:1923897] [ENSMUST00000043448]			Mm.482906		19.4267	23.062	4.79376	3.95929	26.6453	13.9728	17.662	27.3601	20.6794	21.1465	4.55939	4.79215	5.02975	4.34145	3.71675	3.81969
A_55_P2433438	0.360823	0.494253	1.17669	up	NM_011544	chr9:71692086-71692059	Tcf12	Mus musculus transcription factor 12 (Tcf12), transcript variant 1, mRNA [NM_011544]	GO:0005515|GO:0005667|GO:0006355|GO:0003700|GO:0046982|GO:0044212|GO:0035497|GO:0070888|GO:0005634|GO:0007275|GO:0003677|GO:0006351|GO:0030154|GO:0007399|GO:0010628|GO:0045666|GO:0045944|GO:0046983|GO:0071837|GO:0045893	NM_011544	Mm.171615	21406	508.96	756.966	9.29463	9.0599	900.797	289.028	337.053	813.495	723.419	733.984	9.68107	8.99635	9.20647	9.25586	8.90124	9.02262
A_52_P432780	0.0145676	0.0784902	1.42797	up	NM_178603	chr4:49527148-49527089	Mrpl50	Mus musculus mitochondrial ribosomal protein L50 (Mrpl50), mRNA [NM_178603]	GO:0005739|GO:0008150|GO:0003674|GO:0030529|GO:0005840	NM_178603	Mm.30052	28028	407.112	557.203	9.10365	8.58969	580.119	356.479	284.738	496.895	655.323	519.393	9.06031	9.28032	8.97033	8.52037	8.75688	8.49182
A_55_P2051840	0.000609573	0.0268324	2.21652	up		chr17:035440553-035440494							237.338	223.158	8.3903	7.24201	312.603	203.722	195.69	189.814	247.97	231.691	8.19616	8.52846	8.4463	7.12046	7.31747	7.28809
A_55_P1968982	0.0102528	0.0667323	1.61159	up	NM_016768	chr2:34027540-34027481	Pbx3	Mus musculus pre B cell leukemia homeobox 3 (Pbx3), transcript variant a, mRNA [NM_016768]	GO:0005515|GO:0005667|GO:0008344|GO:0006355|GO:0003700|GO:0007585|GO:0005634|GO:0003677|GO:0006351|GO:0021516|GO:0043565|GO:0002087|GO:0048666	NM_016768	Mm.239941	18516	643.902	753.488	9.73398	9.04549	921.269	468.433	542.003	846.359	698.814	715.29	9.7178	9.63619	9.84796	9.30892	8.84592	8.98163
A_55_P1979728	0.00249141	0.0388945	1.92998	up	NM_009716	chr15:80087902-80087961	Atf4	Mus musculus activating transcription factor 4 (Atf4), transcript variant 1, mRNA [NM_009716]	GO:0005515|GO:0005667|GO:0034976|GO:0006355|GO:0003700|GO:0005886|GO:0006357|GO:0043267|GO:0006094|GO:0007214|GO:0005634|GO:0008022|GO:0003677|GO:0006351|GO:0043565|GO:0005622|GO:0005737|GO:0043525|GO:0032590|GO:0016020|GO:0070059|GO:0045944|GO:0045893|GO:0005856	NM_009716	Mm.641	11911	22886.8	18976.1	14.7612	13.8126	36891.1	17883.2	13886.3	20178.4	18395.5	18354.2	14.9365	14.843	14.5041	13.901	13.7312	13.8056
A_52_P430169	0.258928	0.394791	1.29894	up	NM_001159361	chr15:100049416-100049475	Dip2b	Mus musculus DIP2 disco-interacting protein 2 homolog B (Drosophila) (Dip2b), transcript variant 1, mRNA [NM_001159361]	GO:0008150|GO:0003674|GO:0005737|GO:0008152|GO:0005634|GO:0003824|GO:0070062|GO:0008134	NM_001159361	Mm.243658	239667	380.057	553.601	8.93864	8.56131	604.414	200.646	335.111	400.727	609.262	650.815	9.11296	8.50348	9.19949	8.20613	8.646	8.83179
A_55_P2175381	0.108038	0.229891	1.58534	up		chr11:022686818-022686759							33302.8	39240	15.5046	14.8398	35066.2	32406.6	32435.5	39486.6	37915.3	40318.2	14.8653	15.8006	15.8478	14.8534	14.768	14.8978
A_55_P2021125	0.0378751	0.128114	2.0217	up		chr15:008395464-008395405							1093.26	1020.34	10.5344	9.51887	1029.95	1072.97	1176.85	989.38	1022.17	1049.48	9.88645	10.7559	10.961	9.54733	9.42931	9.57998
A_55_P1978615	0.182342	0.313549	1.31282	up	NM_001002239	chr18:75161384-75161443	Rpl17	Mus musculus ribosomal protein L17 (Rpl17), mRNA [NM_001002239]	GO:0005622|GO:0003735|GO:0030529|GO:0015934|GO:0005840|GO:0005634|GO:0022625|GO:0006412	NM_001002239	Mm.276337	319195	12478.5	16393.5	14.0064	13.6137	13736.5	11256.6	12442.4	14545.6	17039.1	17595.9	13.5654	14.1206	14.3331	13.457	13.6415	13.7426
A_55_P1991054	0.856586	0.902406	1.02823	up	NM_001081111	chr6:97105374-97105315	Tmf1	Mus musculus TATA element modulatory factor 1 (Tmf1), mRNA [NM_001081111]	GO:0005515|GO:0001675|GO:2000845|GO:0043066|GO:0006355|GO:0005794|GO:0005783|GO:0007289|GO:0005623|GO:0007286|GO:0005634|GO:0030317|GO:0001819|GO:0003677|GO:0006351|GO:0071407|GO:0005737|GO:0032275|GO:0016020|GO:0061136|GO:0010629|GO:0033327|GO:0042742|GO:0008584	NM_001081111	Mm.30893	232286	291.944	578.846	8.68032	8.64016	376.857	253.137	245.837	658.267	611.16	467.111	8.4535	8.81873	8.76874	8.9369	8.65013	8.33344
A_55_P2149993	0.0149804	0.0798589	2.20631	up		chr9:021223670-021223729		Q80VS3_MOUSE (Q80VS3) Qtrt1 protein, partial (35%) [TC1687878]					111.686	91.9717	7.09033	5.94869	212.026	55.9707	67.0616	79.7361	107.153	89.0256	7.6201	6.7238	6.92708	5.87388	6.0797	5.89249
A_51_P520793	0.234828	0.370233	1.09682	up	XM_006519587	chr14:60840473-60824784	Nupl1	PREDICTED: Mus musculus nucleoporin like 1 (Nupl1), transcript variant X2, mRNA [XM_006519587]	GO:0005515|GO:0016020|GO:0005487|GO:0005643|GO:0006810|GO:0005634|GO:0051028|GO:0015031|GO:0006913	XM_006519587	Mm.258051	71844	91.0344	168.375	6.97245	6.83911	138.016	70.4449	64.6425	155.767	195.597	153.76	6.99632	7.04717	6.87386	6.85309	6.9708	6.69346
A_55_P2156993	0.44295	0.56986	1.62348	up		chr13:049864747-049864806							10.3031	12.831	3.84069	3.1416	5	16.0971	9.81212	10.4039	19.0582	9.03084	2.34394	4.99853	4.1796	3.04265	3.60536	2.77677
A_55_P2022678	0.752552	0.824933	1.14386	up	NM_001204129	chr11:118310045-118310104	C1qtnf1	Mus musculus C1q and tumor necrosis factor related protein 1 (C1qtnf1), transcript variant 1, mRNA [NM_001204129]	GO:0010544|GO:0051897|GO:0005581|GO:0005518|GO:0090331|GO:0005576|GO:2000860|GO:0005615|GO:0007204|GO:0010906|GO:0010628|GO:0070208|GO:0005887|GO:0051260|GO:0043410	NM_001204129	Mm.23845	56745	12.1299	16.4847	3.66023	3.46633	21.1311	5	10.2586	13.0002	19.2043	17.2496	4.20532	2.53038	4.245	3.27122	3.61492	3.51284
A_51_P507023	0.0675435	0.176984	1.48532	up	NM_175331	chr10:86301031-86301090	Nt5dc3	Mus musculus 5'-nucleotidase domain containing 3 (Nt5dc3), mRNA [NM_175331]	GO:0043235|GO:0005739|GO:0008150|GO:0003674|GO:0016787|GO:0046872|GO:0005829	NM_175331	Mm.200446	103466	173.565	226.949	7.84234	7.27156	284.827	133.517	102.351	228.464	193.724	258.659	8.06612	7.94147	7.51942	7.40874	6.95491	7.45104
A_51_P106799	0.0856092	0.202843	1.52894	up	NM_011146	chr6:115440213-115440272	Pparg	Mus musculus peroxisome proliferator activated receptor gamma (Pparg), transcript variant 2, mRNA [NM_011146]	GO:0005515|GO:0030308|GO:0003700|GO:0044212|GO:0006366|GO:0045598|GO:0003707|GO:0001818|GO:0042953|GO:0045444|GO:0004879|GO:0019395|GO:0032869|GO:0010745|GO:0019903|GO:0030331|GO:0000122|GO:0001890|GO:0002674|GO:0019216|GO:0045165|GO:0032966|GO:0045600|GO:0008270|GO:0001012|GO:0015909|GO:0019899|GO:0045892|GO:0008134|GO:0008285|GO:0033993|GO:0005634|GO:0010871|GO:0035357|GO:0005829|GO:0005737|GO:…	NM_011146	Mm.3020	19016	1860.07	2043.55	11.1418	10.5293	3132.49	1224.93	1222.78	2147.58	1597.05	2386	11.4624	10.9465	11.0165	10.6731	10.1047	10.81
A_55_P2155002	0.126392	0.251756	1.20471	up	NM_001038998	chr4:118873819-118873878	Ccdc23	Mus musculus coiled-coil domain containing 23 (Ccdc23), transcript variant 1, mRNA [NM_001038998]	GO:0010596|GO:0003674|GO:0009306|GO:0045177|GO:0031397	NM_001038998	Mm.36697	69216	1268.17	1917.83	10.7203	10.4516	1631.11	1222.25	951.172	1989.03	1834.62	1929.83	10.5429	10.9434	10.6747	10.5635	10.31	10.4814
A_52_P425092	0.00353934	0.0441843	3.89414	up		chr16:36136075-36137745		predicted gene 10092 [Source:MGI Symbol;Acc:MGI:3642362] [ENSMUST00000077110]					25.3069	10.9264	4.94462	2.98332	48.6729	15.2461	12.0016	10.8429	13.604	8.33218	5.44949	4.91954	4.46483	3.08386	3.1662	2.69989
A_66_P106814	0.0048509	0.0495269	1.68828	up	AK168140	chr17:36047385-36047326	Mrps18b	mitochondrial ribosomal protein S18B [Source:MGI Symbol;Acc:MGI:1914223] [ENSMUST00000025305]	GO:0005739|GO:0005622|GO:0030054|GO:0003735|GO:0030529|GO:0005840|GO:0005634|GO:0006412		Mm.29484	66973	3976.53	3998.73	12.2987	11.5431	5275.72	3846.25	2807.61	3876.03	4488.32	3631.83	12.2132	12.5331	12.1498	11.534	11.6548	11.4406
A_51_P466229	0.643173	0.737648	1.14092	up	NM_026840	chr8:42075859-42075918	Pdgfrl	Mus musculus platelet-derived growth factor receptor-like (Pdgfrl), mRNA [NM_026840]	GO:0008150|GO:0003674|GO:0005576|GO:0005575	NM_026840	Mm.284246	68797	24.6948	47.185	5.16432	4.97412	28.007	26.5615	19.5159	57.4693	42.7771	41.3085	4.62694	5.70758	5.15845	5.40847	4.74209	4.77181
A_55_P2153743	0.163332	0.293344	1.17583	up	NM_134420	chr9:108815322-108815380	Slc26a6	Mus musculus solute carrier family 26, member 6 (Slc26a6), mRNA [NM_134420]	GO:0005515|GO:0015562|GO:0019531|GO:0019532|GO:0015660|GO:0031526|GO:0005254|GO:0043231|GO:0005622|GO:0015797|GO:0015659|GO:0006810|GO:0070633|GO:0030165|GO:0038166|GO:0015499|GO:0071346|GO:0005887|GO:0008272|GO:0051454|GO:0015701|GO:0008271|GO:0051453|GO:2001150|GO:0048240|GO:0006820|GO:0030321|GO:0006821|GO:0005886|GO:0005783|GO:0097225|GO:0042045|GO:0016323|GO:0016324|GO:0015297|GO:0015301|GO:…	NM_134420	Mm.45201	171429	21610.5	31438.2	14.7503	14.5166	31262.5	16079.9	17489	37245.8	29328.9	27739.8	14.7226	14.6629	14.8653	14.7629	14.3884	14.3985
A_55_P1991617	0.356593	0.490381	1.25727	up	NR_040743	chr9:63928583-63928642	Scarletltr	Mus musculus Scarletltr, erythroid developmental long intergenic non-protein coding transcript (Scarletltr), long non-coding RNA [NR_040743]	GO:0008150|GO:0003674|GO:0005575	NR_040743	Mm.243771	76814	8.842	15.6058	3.72027	3.38997	9.39411	7.26332	9.86857	14.0451	17.841	14.9312	3.12831	3.84644	4.18606	3.36863	3.50034	3.30094
A_55_P2026425	0.00709295	0.0579179	2.50808	up		chr7:115094917-115094861							105.176	88.7989	7.23385	5.90726	122.281	111.827	81.4196	80.4674	100.166	85.7634	6.80345	7.69367	7.20442	5.88705	5.99284	5.8419
A_51_P208152	0.016948	0.0847942	1.23418	up	NR_030715	chr8:10924722-10924663	3930402G23Rik	Mus musculus RIKEN cDNA 3930402G23 gene (3930402G23Rik), long non-coding RNA [NR_030715]	GO:0008150|GO:0003674|GO:0005575	NR_030715	Mm.358758	665306	104.941	169.359	7.15361	6.85007	165.355	77.6753	71.794	160.747	181.759	165.57	7.25465	7.18964	7.01655	6.89717	6.85796	6.79507
A_51_P273326	0.508354	0.627076	1.06931	up	NM_026969	chr5:100790818-100790759	Sec31a	Mus musculus Sec31 homolog A (S. cerevisiae) (Sec31a), mRNA [NM_026969]	GO:0030134|GO:0048471|GO:0030120|GO:0005783|GO:0031410|GO:0015031|GO:0070971|GO:0043231|GO:0051592|GO:0005737|GO:0016020|GO:0006810|GO:0016192|GO:0005768|GO:0048306	NM_026969	Mm.18634	69162	8667.68	13650.9	13.4317	13.335	11584.7	7276.81	7141.57	11378.4	15609.5	13964.8	13.3171	13.462	13.5159	13.1001	13.4886	13.4163
A_52_P578723	0.049892	0.14883	1.9061	up	NM_177379	chr9:32068263-32068322	Arhgap32	Mus musculus Rho GTPase activating protein 32 (Arhgap32), transcript variant 2, mRNA [NM_177379]	GO:0005794|GO:0030054|GO:0005886|GO:0005783|GO:0045202|GO:0042995|GO:0007266|GO:0015629|GO:0043547|GO:0005622|GO:0007165|GO:0005737|GO:0016020|GO:0045211|GO:0035091|GO:0005938|GO:0005096|GO:0005768	NM_177379	Mm.46683	330914	213.679	233.851	8.25322	7.32259	211.069	237.202	192.765	221.894	235.397	244.263	7.61137	8.72455	8.42372	7.36078	7.24149	7.36551
A_55_P2012056	0.132297	0.258724	1.53759	up	NM_009233	chr8:12399496-12399555	Sox1	Mus musculus SRY (sex determining region Y)-box 1 (Sox1), mRNA [NM_009233]	GO:0043565|GO:0006355|GO:0021521|GO:0002089|GO:0021879|GO:0005634|GO:0030900|GO:0001046|GO:0021884|GO:0001764|GO:0003677|GO:0006351	NM_009233	Mm.39088	20664	75.6813	105.686	6.78731	6.16664	77.0682	73.1688	76.8069	99.7068	106.816	110.535	6.13559	7.10341	7.12293	6.21137	6.07634	6.21222
A_51_P126437	0.142505	0.270151	1.60167	up	NM_007930	chr13:98022739-98022798	Enc1	Mus musculus ectodermal-neural cortex 1 (Enc1), mRNA [NM_007930]	GO:0017148|GO:0000790|GO:0016567|GO:0005730|GO:0003779|GO:0005634|GO:0007275|GO:0016363|GO:0005737|GO:0010976|GO:0043025|GO:0031463|GO:0005654|GO:0005856|GO:0010499	NM_007930	Mm.241073	13803	260.021	271.825	8.21415	7.53457	517.541	153.631	108.889	237.598	303.694	274.183	8.88851	8.14394	7.60999	7.46768	7.60722	7.52881
A_51_P337675	0.697009	0.782762	1.16923	up	NM_007651	chr3:106566140-106565046	Cd53	Mus musculus CD53 antigen (Cd53), mRNA [NM_007651]	GO:0001772|GO:0016337|GO:0030054|GO:0016020|GO:0009986|GO:0005886|GO:0005911|GO:0016021|GO:0070062|GO:0045661	NM_007651	Mm.316861	12508	110.256	215.675	7.31193	7.08638	105.857	104.317	120.595	136.149	165.365	345.509	6.58571	7.59285	7.75725	6.66171	6.72124	7.87618
A_55_P2036547	0.177076	0.308071	2.61064	up	NM_153193	chr3:98515113-98515054	Hsd3b2	Mus musculus hydroxy-delta-5-steroid dehydrogenase, 3 beta- and steroid delta-isomerase 2 (Hsd3b2), mRNA [NM_153193]	GO:0004769|GO:0006694|GO:0005783|GO:0005743|GO:0003824|GO:0003854|GO:0016616|GO:0005739|GO:0005758|GO:0016020|GO:0008152|GO:0016491|GO:0016021|GO:0016853|GO:0055114	NM_153193	Mm.482364	15493	49.2552	41.0879	6.03742	4.65301	28.1925	41.931	77.642	19.677	44.4187	59.1681	4.63739	6.33745	7.1374	3.87187	4.80018	5.28698
A_51_P364421	0.527623	0.643656	1.04795	up	NM_011515	chrX_random:11152-11093	Vamp7	Mus musculus vesicle-associated membrane protein 7 (Vamp7), mRNA [NM_011515]	GO:0043005|GO:0048471|GO:0030054|GO:0043001|GO:0005783|GO:0043312|GO:0045202|GO:0031201|GO:0006887|GO:0005765|GO:0015031|GO:0005764|GO:0006906|GO:0043231|GO:0005622|GO:0005737|GO:0017156|GO:0000149|GO:0006810|GO:0016192|GO:0034197|GO:0070062|GO:0019905|GO:0005794|GO:0008333|GO:0005623|GO:0045177|GO:0048280|GO:0031410|GO:0043308|GO:0006911|GO:0006897|GO:0045335|GO:0006888|GO:0005484|GO:0016020|GO:…	NM_011515	Mm.1517	20955	1675.25	2828.03	11.0958	11.0283	2291.84	1530.31	1203.6	2926.61	2853.02	2704.48	11.0322	11.2615	10.9939	11.1277	10.9601	10.997
A_55_P2078073	9.04335e-05	0.0174149	1.99519	up	NM_145384	chr4:138854545-138854486	Pqlc2	Mus musculus PQ loop repeat containing 2 (Pqlc2), mRNA [NM_145384]	GO:0016020|GO:0031301|GO:0015181|GO:0006865|GO:0006810|GO:0016021|GO:0015809|GO:0005765|GO:0005764|GO:0080144|GO:0015819|GO:0015189	NM_145384	Mm.45131	212555	732.053	694.532	9.92904	8.93252	1003.04	587.166	605.95	692.066	717.751	673.779	9.8459	9.94213	9.99909	9.01986	8.88918	8.88851
A_55_P2013833	0.0668548	0.176025	1.39631	up	NM_010028	chrX:12871050-12871109	Ddx3x	Mus musculus DEAD/H (Asp-Glu-Ala-Asp/His) box polypeptide 3, X-linked (Ddx3x), mRNA [NM_010028]	GO:0005515|GO:0017148|GO:0048027|GO:0030308|GO:0030307|GO:0000166|GO:0032508|GO:0043024|GO:0070062|GO:0005852|GO:0042256|GO:0071470|GO:0042254|GO:2001243|GO:0043280|GO:0034063|GO:0045087|GO:0010501|GO:0071243|GO:0008134|GO:0002376|GO:0008625|GO:0035613|GO:1900087|GO:0006200|GO:0010494|GO:0003723|GO:0005741|GO:0005634|GO:0004004|GO:0005739|GO:0035556|GO:0005737|GO:0007059|GO:0004003|GO:0031333|GO:…	NM_010028	Mm.289662	13205	4233.55	4698.23	12.2793	11.7977	7116.45	3005.29	2578.91	4828.91	4633.64	4632.13	12.6405	12.1748	12.0228	11.8764	11.7017	11.8151
A_55_P2452914	0.00981229	0.0653913	1.52333	up	NM_001024917	chr5:66198590-66198649	N4bp2	Mus musculus NEDD4 binding protein 2 (N4bp2), mRNA [NM_001024917]	GO:0005515|GO:0046404|GO:0016310|GO:0004519|GO:0090305|GO:0005524|GO:0005829	NM_001024917	Mm.332398	333789	58.114	76.6365	6.29865	5.69142	92.9629	35.5715	45.8075	79.028	78.4164	72.4651	6.40322	6.10149	6.39124	5.86241	5.62826	5.58358
A_51_P253697	0.292284	0.427603	1.20567	up	NM_027186	chr11:70787628-70788454	Rpain	Mus musculus RPA interacting protein (Rpain), transcript variant 1, mRNA [NM_027186]	GO:0006261|GO:0005737|GO:0006281|GO:0016605|GO:0005730|GO:0006310|GO:0005634|GO:0006606|GO:0032403|GO:0009411|GO:0046872	NM_027186	Mm.275691	69723	100.82	171.194	7.13161	6.86178	135.611	62.0207	104.827	150.917	197.208	165.458	6.97021	6.86848	7.55615	6.80831	6.98258	6.79445
A_55_P2043723	0.0796598	0.194638	1.41845	up	NM_010261	chr7:25757181-25757122	Rabac1	Mus musculus Rab acceptor 1 (prenylated) (Rabac1), mRNA [NM_010261]	GO:0005515|GO:0005737|GO:0030054|GO:0005794|GO:0016020|GO:0005886|GO:0045202|GO:0031410|GO:0016021|GO:0008022|GO:0070064|GO:0042802	NM_010261	Mm.22473	14470	1071.15	1406.5	10.5011	9.99677	1228.64	878.134	1106.68	1410.84	1474.77	1333.88	10.1389	10.4909	10.8734	10.073	9.97944	9.93789
A_55_P1954633	0.0278166	0.108405	2.17717	up	NM_001291190	chr11:77273643-77273702	Ssh2	Mus musculus slingshot homolog 2 (Drosophila) (Ssh2), transcript variant 2, mRNA [NM_001291190]	GO:0030054|GO:0030036|GO:0003779|GO:0003677|GO:0005615|GO:0010591|GO:0016791|GO:0005737|GO:0006470|GO:0016787|GO:0008064|GO:0016311|GO:0004721|GO:0008138|GO:0005856|GO:0050770|GO:0004725	NM_001291190	Mm.440381	237860	1059.31	925.907	10.4833	9.3608	1059.96	1221.43	896.557	1016.48	818.393	942.85	9.92676	10.9422	10.5808	9.59174	9.08356	9.4071
A_51_P303238	0.000987027	0.0306874	1.57878	up	NM_026775	chr12:86681665-86681606	Tmed10	Mus musculus transmembrane emp24-like trafficking protein 10 (yeast) (Tmed10), mRNA [NM_026775]	GO:0005801|GO:0005886|GO:0030137|GO:0005783|GO:0015031|GO:0006886|GO:0032403|GO:0051259|GO:0035964|GO:0043231|GO:0005622|GO:0007030|GO:0006810|GO:0016192|GO:0019905|GO:0005793|GO:0005794|GO:0070765|GO:0005623|GO:0031410|GO:0034205|GO:0042589|GO:0016020|GO:0000139|GO:0016021|GO:0030667	NM_026775	Mm.379159	68581	1621.32	1847.68	11.0544	10.3956	2212.25	1374.14	1277.55	1620.9	1975.78	1946.37	10.984	11.105	11.0743	10.2703	10.4168	10.4997
A_66_P136632	0.110912	0.233139	1.25151	up	NM_019769	chr2:119406436-119410268	Chp1	Mus musculus calcineurin-like EF hand protein 1 (Chp1), mRNA [NM_019769]	GO:0008017|GO:0030133|GO:0005215|GO:0032417|GO:0005886|GO:0005783|GO:0001578|GO:0005634|GO:0031122|GO:0015031|GO:0051259|GO:0046872|GO:0005829|GO:0031953|GO:0045056|GO:0005737|GO:0010923|GO:0017156|GO:0006611|GO:0015630|GO:0006810|GO:0061024|GO:0061025|GO:0060050|GO:0031397|GO:0005856|GO:0019900|GO:0070062|GO:0022406|GO:0005509|GO:0050821|GO:0032088|GO:0070885|GO:0051222|GO:0000139|GO:0016020|GO:…	NM_019769	Mm.214765	56398	739.841	1108.76	9.93558	9.61191	1041.62	568.444	609.461	885.089	1405.78	1035.39	9.90181	9.89669	10.0082	9.37675	9.90287	9.55611
A_55_P2068414	0.0712398	0.18241	1.34911	up	XR_381329	chr12:20464673-20464732	Gm19924	PREDICTED: Mus musculus predicted gene, 19924 (Gm19924), misc_RNA [XR_381329]		XR_381329	Mm.490993	100503846	25.0326	36.0373	5.03576	4.60375	42.8226	13.0897	19.1853	35.1161	37.4314	35.5645	5.26655	4.70482	5.13589	4.70444	4.54546	4.56135
A_55_P2014100	0.579987	0.688045	1.11445	up	NM_001177666	chr13:120277695-120277754	Gm7120	Mus musculus predicted gene 7120 (Gm7120), transcript variant 2, mRNA [NM_001177666]	GO:0008150|GO:0003674|GO:0005575	NM_001177666	Mm.46679	633640	47.3989	82.0889	5.94133	5.785	83.7342	26.6443	31.8182	95.2751	68.9163	82.0752	6.25019	5.71239	5.86142	6.14459	5.43597	5.77444
A_51_P484671	0.77838	0.844597	1.2575	up	NM_138305	chr12:4211535-4211594	Adcy3	Mus musculus adenylate cyclase 3 (Adcy3), transcript variant 1, mRNA [NM_138305]	GO:0005515|GO:0005516|GO:0007608|GO:0016849|GO:0005886|GO:0008294|GO:0005634|GO:0005524|GO:0046872|GO:0016829|GO:0035556|GO:0005929|GO:0007190|GO:0005737|GO:0004016|GO:0016020|GO:0000166|GO:0006171|GO:0045121|GO:0016021|GO:0009190|GO:0050896	NM_138305	Mm.489807	104111	18.8927	27.2953	4.52183	4.19127	5	27.4855	24.1926	21.6514	33.7313	26.5033	2.34394	5.74748	5.47406	4.00952	4.40935	4.15494
A_51_P435817	0.695376	0.7813	1.08467	up	NM_028603	chr4:129031222-129031163	Zbtb8a	Mus musculus zinc finger and BTB domain containing 8a (Zbtb8a), mRNA [NM_028603]	GO:0008150|GO:0006355|GO:0005634|GO:0003676|GO:0003677|GO:0046872|GO:0006351	NM_028603	Mm.32997	73680	128.038	251.188	7.53723	7.41997	141.095	120.552	122.466	247.946	287.003	218.614	7.02792	7.80601	7.77775	7.53513	7.52976	7.19502
A_51_P120615	0.158921	0.289211	1.25741	up	NM_001042499	chr16:37572151-37572210	Rabl3	Mus musculus RAB, member RAS oncogene family-like 3 (Rabl3), mRNA [NM_001042499]	GO:0008150|GO:0003674|GO:0000166|GO:0007264|GO:0005575|GO:0005525	NM_001042499	Mm.28158	67657	966.598	1403.05	10.297	9.96659	1392.36	810.727	696.71	1040.74	1761.24	1407.16	10.3066	10.3803	10.2042	9.62347	10.2543	10.022
A_55_P2031501	0.253231	0.389031	1.19868	up	NM_146130	chr2:75503679-75503738	Hnrnpa3	Mus musculus heterogeneous nuclear ribonucleoprotein A3 (Hnrnpa3), transcript variant b, mRNA [NM_146130]	GO:0006397|GO:0008380|GO:0043005|GO:0003723|GO:0005634|GO:0003676|GO:0003729|GO:0055085|GO:0005737|GO:0019013|GO:0051033|GO:0000166|GO:0030529|GO:0005681|GO:0035770|GO:0051028|GO:0019012	NM_146130	Mm.379375	229279	21584	31319.8	14.7912	14.5298	26417.9	22202.4	16131.8	30142.3	33005	30812.2	14.4877	15.1511	14.735	14.4678	14.5656	14.556
A_55_P2037737	0.25674	0.392625	1.14964	up	NM_008525	chr4:62169522-62169463	Alad	Mus musculus aminolevulinate, delta-, dehydratase (Alad), transcript variant 1, mRNA [NM_008525]	GO:0046685|GO:0010033|GO:0007584|GO:0045471|GO:0042493|GO:0032791|GO:0005634|GO:0004655|GO:0033014|GO:0003824|GO:0005615|GO:0010043|GO:0046872|GO:0016829|GO:0042802|GO:0005829|GO:0006783|GO:0006779|GO:0010038|GO:0008152|GO:0071353|GO:0051260|GO:0008270|GO:0046686	NM_008525	Mm.6988	17025	45.0162	82.1707	5.98879	5.78761	62.8693	30.3314	41.848	73.4154	96.3942	76.7025	5.83065	5.88481	6.25092	5.75665	5.93156	5.67463
A_66_P110606	0.0425564	0.136142	2.35449	up	AK028898	chr11:50012927-50012868	Sqstm1	sequestosome 1 [Source:MGI Symbol;Acc:MGI:107931] [ENSMUST00000015981]	GO:0005515|GO:0043130|GO:0005783|GO:0005634|GO:0051291|GO:0005764|GO:0046872|GO:0030154|GO:0042803|GO:0042802|GO:0005737|GO:0000932|GO:0005080|GO:2001141|GO:0042169|GO:0043122|GO:0070530|GO:0070062|GO:0003712|GO:0005776|GO:0016235|GO:0019901|GO:0006914|GO:0006915|GO:0000407|GO:0031410|GO:0001934|GO:0008270|GO:0005768|GO:0002376			18412	90.3615	81.3235	7.00642	5.77101	86.3944	114.251	70.4386	73.7202	95.9321	74.3183	6.29908	7.72529	6.99488	5.76396	5.92453	5.62452
A_55_P2094262	0.16333	0.293344	1.61135	up	NM_009414	chr7:53902612-53902553	Tph1	Mus musculus tryptophan hydroxylase 1 (Tph1), transcript variant 1, mRNA [NM_009414]	GO:0043005|GO:0005506|GO:0009072|GO:0046872|GO:0004497|GO:0004510|GO:0030279|GO:0042427|GO:0046849|GO:0008152|GO:0016491|GO:0016714|GO:0016597|GO:0060749|GO:0055114	NM_009414	Mm.248684	21990	293.566	330.754	8.44007	7.7518	567.097	161.64	151.962	217.424	478.662	296.176	9.02506	8.20724	8.0879	7.33265	8.27232	7.65044
A_55_P1972720	0.0103499	0.0669308	2.19099	up	NM_013872	chr15:81781601-81781542	Pmm1	Mus musculus phosphomannomutase 1 (Pmm1), transcript variant 1, mRNA [NM_013872]	GO:0004615|GO:0005737|GO:0008152|GO:0043025|GO:0019307|GO:0016853|GO:0003824|GO:0046872|GO:0006013	NM_013872	Mm.18939	29858	1965.29	1574	11.2667	10.1351	3050.03	1352.18	1493.67	1229.07	1441.11	2051.81	11.4219	11.0821	11.2962	9.87399	9.9429	10.5885
A_52_P106537	0.0718861	0.183414	1.54481	up	NM_053068	chr15:72923364-72923987	Chrac1	Mus musculus chromatin accessibility complex 1 (Chrac1), mRNA [NM_053068]	GO:0043565|GO:0005622|GO:0005515|GO:0008150|GO:0046982|GO:0003887|GO:0016779|GO:0005634|GO:0005575|GO:0003677|GO:0016740	NM_053068	Mm.23095	93696	542.765	686.498	9.54092	8.91349	589.496	591.608	447.193	648.658	687.28	723.556	9.08164	9.95467	9.58644	8.91746	8.82381	8.9992
A_51_P156927	0.306228	0.440901	1.1833	up	NM_001081195	chr12:72198981-72199040	Arid4a	Mus musculus AT rich interactive domain 4A (RBP1-like) (Arid4a), mRNA [NM_001081195]	GO:0048821|GO:0017053|GO:0080182|GO:0036124|GO:0006349|GO:0045892|GO:0034773	NM_001081195	Mm.241601	238247	243.399	430.015	8.43324	8.19042	308.941	200.73	220.526	317.737	476.077	496.232	8.1788	8.50477	8.61615	7.88284	8.26578	8.42265
A_66_P101764	0.451028	0.576853	1.07699	up	AK042950	chr5:31399309-31399368		predicted gene 9924 [Source:MGI Symbol;Acc:MGI:3642216] [ENSMUST00000066505]			Mm.404552		425.4	725.033	9.10351	8.9965	694.595	298.995	282.608	746.281	715.367	713.452	9.31135	9.04008	8.9591	9.12907	8.88407	8.97638
A_51_P165602	0.415143	0.543975	1.1428	up	NM_010692	chr6:83038149-83038208	Lbx2	Mus musculus ladybird homeobox homolog 2 (Drosophila) (Lbx2), mRNA [NM_010692]	GO:0043565|GO:0008150|GO:0006355|GO:0000976|GO:0003700|GO:0005634|GO:0005575|GO:0003677|GO:0006351	NM_010692	Mm.20359	16815	41.6814	76.3706	5.86943	5.67685	60.3684	29.0239	35.6519	89.6744	66.7956	72.6419	5.76815	5.82323	6.0169	6.05573	5.38666	5.58818
A_55_P2122429	0.308613	0.443194	1.40255	up	NM_001111143	chr3:107014272-107014213	Cym	Mus musculus chymosin (Cym), mRNA [NM_001111143]	GO:0008150|GO:0003674|GO:0016787|GO:0006508|GO:0008233|GO:0005575|GO:0004190	NM_001111143	Mm.297051	229697	2294.1	2447.95	11.2968	10.8088	4320.71	920.23	1641.37	2724.75	2528.76	2090.34	11.9231	10.5476	11.4199	11.0241	10.7852	10.6172
A_55_P1977593	0.00563668	0.0529131	1.15338	up	XM_006498011	chr2:49407403-49407462	Epc2	enhancer of polycomb homolog 2 (Drosophila) [Source:MGI Symbol;Acc:MGI:1278321] [ENSMUST00000092123]	GO:0008150|GO:0003674|GO:0006355|GO:0032777|GO:0006281|GO:0035267|GO:0005634|GO:0005575|GO:0006974|GO:0006351|GO:0016568	XM_006498011	Mm.29167	227867	2715.18	3966.06	11.7407	11.5348	4018.72	2096.1	2030.72	3890.84	4150.35	3856.99	11.8156	11.6931	11.7133	11.5403	11.5327	11.5314
A_55_P2019009	0.170506	0.301157	1.3824	up	NM_172495	chr10:30368311-30368252	Ncoa7	Mus musculus nuclear receptor coactivator 7 (Ncoa7), transcript variant 1, mRNA [NM_172495]	GO:0005622|GO:0006355|GO:0030374|GO:0045944|GO:0035257|GO:0005634|GO:0006351	NM_172495	Mm.297903	211329	46.5426	66.0539	5.94738	5.4802	74.5816	41.7465	23.2998	65.3964	70.2503	62.5149	6.08688	6.33273	5.42252	5.60224	5.46668	5.37169
A_51_P430552	0.000781877	0.0286379	1.71225	up	NM_175935	chr11:102055338-102055395	G6pc3	Mus musculus glucose 6 phosphatase, catalytic, 3 (G6pc3), mRNA [NM_175935]	GO:0016787|GO:0016020|GO:0005783|GO:0016311|GO:0004346|GO:0006094|GO:0015760|GO:0016021|GO:0006796|GO:0003824|GO:0051156	NM_175935	Mm.22385	68401	2104.16	2203.8	11.4342	10.6583	2736.78	1779.32	1796.39	2187.9	2321.56	2101.93	11.2772	11.4755	11.5499	10.7018	10.648	10.625
A_66_P128963	0.125036	0.250117	1.62116	up	NM_010006	chr15:82285582-82285641	Cyp2d9	Mus musculus cytochrome P450, family 2, subfamily d, polypeptide 9 (Cyp2d9), mRNA [NM_010006]	GO:0004497|GO:0070330|GO:0016020|GO:0005506|GO:0005783|GO:0016491|GO:0016712|GO:0016705|GO:0046872|GO:0055114|GO:0043231|GO:0020037	NM_010006	Mm.226708	13105	23.1863	26.247	4.84004	4.14302	42.1051	9.51022	17.9435	29.8255	27.632	21.2837	5.24029	4.23041	5.04944	4.46787	4.12932	3.83187
A_51_P518926	0.0101275	0.0663686	1.84331	up	NM_028005	chr11:68874564-68874623	2310047M10Rik	Mus musculus RIKEN cDNA 2310047M10 gene (2310047M10Rik), mRNA [NM_028005]	GO:0005515|GO:0008150|GO:0005575	NM_028005	Mm.340257	71923	326.488	361.099	8.82129	7.93899	425.686	240.152	313.626	277.024	408.216	398.058	8.61946	8.7415	9.10291	7.68915	8.03299	8.09484
A_51_P274504	0.115967	0.239207	1.32593	up	NM_011573	chr9:106561190-106561131	Tex264	Mus musculus testis expressed gene 264 (Tex264), transcript variant 1, mRNA [NM_011573]	GO:0008150|GO:0003674|GO:0005575	NM_011573	Mm.22266	21767	892.318	1269.75	10.2394	9.83235	1102.63	791.072	783.254	1465.24	1285.57	1058.43	9.98116	10.352	10.3849	10.1278	9.77611	9.59314
A_51_P107808	0.39048	0.521448	1.10627	up	NM_028360	chr11:62129704-62129763	Ttc19	Mus musculus tetratricopeptide repeat domain 19 (Ttc19), transcript variant 1, mRNA [NM_028360]	GO:0005739|GO:0005515|GO:0034551|GO:0016020|GO:0005743	NM_028360	Mm.489722	72795	79.6953	147.813	6.77214	6.62643	123.109	59.6064	56.3707	113.865	185.499	144.076	6.81551	6.81307	6.68783	6.3903	6.89165	6.59735
A_66_P133202	0.687448	0.775363	1.05258	up	NM_008692	chr4:120430107-120430048	Nfyc	Mus musculus nuclear transcription factor-Y gamma (Nfyc), transcript variant 1, mRNA [NM_008692]	GO:0005667|GO:0006355|GO:0003700|GO:0044212|GO:0046982|GO:0005634|GO:0003677|GO:0006351|GO:0005622|GO:0043565|GO:0016602|GO:0045893|GO:0008134	NM_008692	Mm.435590	18046	2130.54	3613.52	11.4698	11.3958	2454.39	2019.43	1917.8	3565.89	3870.88	3403.78	11.132	11.6421	11.6351	11.417	11.4255	11.3449
A_52_P329367	0.0395151	0.130817	2.27447	up	BC056758	chr19:3866971-3867030	Chka	choline kinase alpha [Source:MGI Symbol;Acc:MGI:107760] [ENSMUST00000154467]	GO:0033265|GO:0004305|GO:0006629|GO:0006646|GO:0004104|GO:0004103|GO:0008654|GO:0019695|GO:0005524|GO:0042803|GO:0016310|GO:0005737|GO:0000166|GO:0016301|GO:0008144|GO:0006657|GO:0016740|GO:0016772|GO:0006656			12660	834.062	718.865	10.0581	8.87256	1289.41	522.338	690.436	426.138	1106.82	623.637	10.2033	9.7811	10.1899	8.29185	9.55611	8.76973
A_51_P346445	0.00149593	0.033785	3.01335	up	NM_013868	chr4:140980355-140980414	Hspb7	Mus musculus heat shock protein family, member 7 (cardiovascular) (Hspb7), mRNA [NM_013868]	GO:0005739|GO:0005737|GO:0009408|GO:0031005|GO:0006950|GO:0005634|GO:0015629	NM_013868	Mm.46181	29818	33.5095	23.6313	5.59113	3.99976	43.9585	25.4757	31.0944	22.9222	20.9019	27.0699	5.3067	5.63783	5.82886	4.08566	3.73039	4.18323
A_55_P1953475	0.178794	0.309811	1.26424	up		chr6:060411943-060411884							38633.1	56385	15.699	15.3608	47888.9	35748.7	32261.6	58321.9	59087.4	51745.6	15.304	15.9578	15.8353	15.3949	15.4322	15.2552
A_55_P2018393	0.549897	0.662421	1.06163	up		chr6:099789882-099789823							4925.12	7845.84	12.6198	12.5335	6569.69	4055.36	4150.3	6461.96	8785.1	8290.46	12.5291	12.6119	12.7184	12.2929	12.6449	12.6628
A_51_P106428	0.190033	0.322016	1.39208	up	NM_001162855	chr7:137676108-137676049	Nsmce4a	Mus musculus non-SMC element 4 homolog A (S. cerevisiae) (Nsmce4a), mRNA [NM_001162855]	GO:0003674|GO:0030915|GO:2001022|GO:0005634	NM_001162855	Mm.21714	67872	4799.98	5929.4	12.6218	12.1445	4638.47	5276.83	4484.63	5948.82	6113.69	5725.69	12.0248	13.0039	12.8367	12.1729	12.1325	12.1282
A_55_P2160421	0.0142203	0.0773605	1.61303	up		chr13:048970770-048970829							26.464	34.6979	5.24186	4.55209	35.6494	19.3144	24.4283	33.1024	33.4065	37.5849	4.98339	5.25126	5.49094	4.6223	4.39625	4.63772
A_55_P2034858	0.217778	0.352103	1.1479	up	NM_021501	chr10:80617285-80617226	Pias4	Mus musculus protein inhibitor of activated STAT 4 (Pias4), mRNA [NM_021501]	GO:0005515|GO:0016874|GO:0005634|GO:0016363|GO:0046872|GO:0005622|GO:0005737|GO:0019789|GO:0033235|GO:0016032|GO:0016055|GO:2001141|GO:0031625|GO:0006355|GO:0003714|GO:0016925|GO:0007275|GO:0032088|GO:0000122|GO:0003676|GO:0007259|GO:0003677|GO:0006351|GO:0008270|GO:0045892	NM_021501	Mm.34428	59004	147.471	261.726	7.68437	7.48538	205.084	100.002	137.325	240.65	291.623	252.905	7.57333	7.53513	7.94466	7.48622	7.55181	7.41809
A_51_P186053	0.160954	0.291321	1.61328	up	NM_026041	chr1:188545084-188545025	Rrp15	Mus musculus ribosomal RNA processing 15 homolog (S. cerevisiae) (Rrp15), mRNA [NM_026041]	GO:0005739|GO:0008150|GO:0003674|GO:0005730|GO:0005634	NM_026041	Mm.289841	67223	965.243	1088.21	10.3041	9.61407	873.903	1301.2	720.62	1005.24	1185.1	1074.29	9.63785	11.0237	10.2506	9.5714	9.6532	9.61761
A_55_P1954156	0.0518914	0.152453	1.75068	up	NM_175639	chr17:72007156-72007215	Wdr43	Mus musculus WD repeat domain 43 (Wdr43), mRNA [NM_175639]	GO:0008150|GO:0005634|GO:0005575	NM_175639	Mm.257762	72515	1023.65	1059.98	10.387	9.57909	1155.17	1241.5	674.281	1061.09	1048.53	1070.31	10.0479	10.9638	10.1494	9.65222	9.47393	9.61111
A_55_P2048928	0.0590245	0.163877	1.53285	up	NM_001161458	chr8:107741792-107741851	Cbfb	Mus musculus core binding factor beta (Cbfb), transcript variant 4, mRNA [NM_001161458]	GO:0005515|GO:0001503|GO:0045944|GO:0003713|GO:0030098|GO:0030099|GO:0060216|GO:0048469|GO:0005634|GO:0003677|GO:0001649	NM_001161458	Mm.2018	12400	1367.07	1645.25	10.8386	10.2224	1582.17	1446.99	1072.05	1736.68	1461.9	1737.16	10.5004	11.183	10.8323	10.3704	9.96534	10.3313
A_52_P442852	0.110628	0.232821	1.13939	up	NM_001024135	chr14:79830198-79830257	Kbtbd7	Mus musculus kelch repeat and BTB (POZ) domain containing 7 (Kbtbd7), mRNA [NM_001024135]	GO:0008150|GO:0003674|GO:0005575	NM_001024135	Mm.284526	211255	67.3621	118.343	6.51024	6.32198	107.808	47.1447	47.1337	112.944	115.029	127.057	6.61278	6.4863	6.43163	6.3783	6.17351	6.41412
A_66_P123989	0.00535048	0.0516731	2.29141	up	NM_175115	chr7:138533945-138533886	Ikzf5	Mus musculus IKAROS family zinc finger 5 (Ikzf5), mRNA [NM_175115]	GO:0008150|GO:0006355|GO:0005634|GO:0003676|GO:0003677|GO:0046872|GO:0006351	NM_175115	Mm.334273	67143	334.655	293.32	8.85067	7.65444	416.525	355.285	232.155	281.266	298.869	299.825	8.58872	9.27597	8.68731	7.70917	7.58341	7.67072
A_55_P2143976	0.00485548	0.0495453	1.42206	up		chrX:7400644-7400703	Kcnd1	potassium voltage-gated channel, Shal-related family, member 1 [Source:MGI Symbol;Acc:MGI:96671] [ENSMUST00000009875]	GO:0005251|GO:0005244|GO:0005267|GO:0042995|GO:0055085|GO:0046872|GO:0016020|GO:0005249|GO:0008076|GO:0043025|GO:0006810|GO:0051260|GO:0034765|GO:0016021|GO:0005216|GO:0006813|GO:0071805|GO:0006811			16506	12.5293	18.3438	4.1383	3.63033	18.0219	9.51645	10.0496	16.5469	20.3018	18.1826	3.96921	4.23215	4.21354	3.6135	3.68941	3.58807
A_55_P2096283	0.00545713	0.0521687	1.386	up		chr17:56753042-56753101		ribosomal protein L36, pseudogene 3 [Source:MGI Symbol;Acc:MGI:3642480] [ENSMUST00000085720]					1224.54	1606.03	10.6683	10.1974	1626.18	1020.59	1026.84	1563	1594.15	1660.95	10.5369	10.691	10.7771	10.2204	10.1017	10.2701
A_55_P2048650	0.3776	0.509797	1.22813	up	AK158840	chr9:64659886-64659945	Dennd4a	Mus musculus visual cortex cDNA, RIKEN full-length enriched library, clone:K430341N21 product:hypothetical protein, full insert sequence. [AK158840]	GO:0017112|GO:0032313|GO:0005575			102442	12601.3	17344.5	13.9583	13.6618	17121.3	8483.12	12199.5	13015.7	16580.6	22437.1	13.8886	13.6764	14.3098	13.2971	13.59	14.0983
A_52_P498128	0.396326	0.526855	1.0775	up	NM_028381	chr17:56105987-56106046	Ccdc94	Mus musculus coiled-coil domain containing 94 (Ccdc94), mRNA [NM_028381]	GO:0008150|GO:0003674|GO:0005575	NM_028381	Mm.22796	72886	42.3925	80.4338	5.87104	5.76336	64.8291	33.9734	28.3749	79.3214	84.8071	77.173	5.87959	6.03972	5.69381	5.86578	5.74017	5.68412
A_51_P125986	0.00181671	0.0353831	3.34585	up	NM_001081151	chr8:119728779-119728838	Gan	Mus musculus giant axonal neuropathy (Gan), mRNA [NM_001081151]	GO:0008219|GO:0005737|GO:0016567|GO:0007010|GO:0031463|GO:0005856	NM_001081151	Mm.132992	209239	837.92	492.568	10.1465	8.40408	928.667	885.698	699.396	417.386	563.994	496.322	9.73076	10.4991	10.2095	8.26268	8.52613	8.42343
A_55_P1958986	0.0641776	0.171907	2.57538	up	NM_001289574	chr12:99907883-99907942	Spata7	Mus musculus spermatogenesis associated 7 (Spata7), transcript variant 4, mRNA [NM_001289574]	GO:0008150|GO:0003674|GO:0005575|GO:0007601|GO:0050896	NM_001289574	Mm.210053	104871	174.846	138.353	7.92067	6.55589	129.212	237.395	157.932	128.449	147.216	139.393	6.89984	8.72502	8.13716	6.56891	6.5497	6.54907
A_55_P2412859	0.0242028	0.101109	2.13478	up	AK018043	chr3:16111728-16111787	5830468K08Rik	Mus musculus adult male thymus cDNA, RIKEN full-length enriched library, clone:5830468K08 product:unclassifiable, full insert sequence. [AK018043]				76096	57.6222	59.7637	6.38475	5.29067	67.6396	46.7625	58.4646	40.7457	65.2827	73.2625	5.94123	6.47572	6.73731	4.91089	5.35741	5.6037
A_55_P2103452	0.978853	0.986136	1.01325	up	NM_010934	chr8:69230632-69230691	Npy1r	Mus musculus neuropeptide Y receptor Y1 (Npy1r), mRNA [NM_010934]	GO:0007631|GO:0030424|GO:0005886|GO:0007268|GO:0005829|GO:0046888|GO:0045907|GO:0007218|GO:0040014|GO:0006006|GO:0007626|GO:0004871|GO:0004930|GO:0051481|GO:0030432|GO:0003151|GO:0019233|GO:0008021|GO:0007165|GO:0004983|GO:0007186|GO:0016020|GO:0001602|GO:0008217|GO:0001601|GO:0016021	NM_010934	Mm.5112	18166	13.3555	27.4814	4.18751	4.16852	9.61132	8.61805	21.8372	19.9431	24.7655	37.7355	3.14962	4.08931	5.3236	3.89508	3.96578	4.6447
A_55_P2371984	0.0209032	0.0936964	2.7279	up	AK020044	chr17:88457036-88456977	5930436O19Rik	Mus musculus 13 days embryo forelimb cDNA, RIKEN full-length enriched library, clone:5930436O19 product:unclassifiable, full insert sequence. [AK020044]			Mm.436825	77068	463.415	344.201	9.32061	7.87281	418.849	532.699	438.698	279.896	345.496	407.21	8.59589	9.80816	9.55777	7.70107	7.78971	8.12766
A_51_P165435	0.159138	0.289412	1.6178	up	NM_009941	chr8:123197924-123197983	Cox4i1	Mus musculus cytochrome c oxidase subunit IV isoform 1 (Cox4i1), mRNA [NM_009941]	GO:0005739|GO:0016020|GO:0004129|GO:0005743|GO:0005634	NM_009941	Mm.386758	12857	22904.1	24911	14.8981	14.2041	20429.2	25137.9	23145.2	23485.4	27305.5	23942	14.1015	15.3131	15.2796	14.1237	14.3005	14.188
A_55_P2121466	0.40525	0.534669	1.15733	up	NM_001252313	chr11:62130251-62130192	Ncor1	Mus musculus nuclear receptor co-repressor 1 (Ncor1), transcript variant 1, mRNA [NM_001252313]	GO:0005515|GO:0000790|GO:0003700|GO:0044212|GO:0021794|GO:0046329|GO:0016580|GO:0017053|GO:0002361|GO:0042632|GO:0001102|GO:0035033|GO:0003714|GO:0019904|GO:0030331|GO:0014067|GO:0000122|GO:0032922|GO:0000118|GO:0001012|GO:0045892|GO:0008284|GO:0048471|GO:0042826|GO:0035257|GO:0005634|GO:0042974|GO:0042975|GO:0046966|GO:0046965|GO:0005737|GO:0060318|GO:0072362|GO:0040014|GO:0005876|GO:0072368|GO:…	NM_001252313	Mm.271814	20185	144.822	263.075	7.66396	7.45316	195.654	100.828	137.982	203.652	348.498	237.073	7.49589	7.5457	7.95029	7.23485	7.7999	7.32473
A_51_P110814	0.136262	0.263189	1.13623	up	NM_028794	chr5:104494235-104494294	Nudt9	Mus musculus nudix (nucleoside diphosphate linked moiety X)-type motif 9 (Nudt9), mRNA [NM_028794]	GO:0005739|GO:0047631|GO:0016787|GO:0046032|GO:0043262|GO:0046709|GO:0070062	NM_028794	Mm.241484	74167	3401.52	4953.59	12.0542	11.8699	4905.7	2444.72	2854.14	4591.53	5575.61	4693.64	12.0964	11.8936	12.1725	11.7998	11.9752	11.8347
A_51_P144632	0.581908	0.68951	1.12832	up	NM_019436	chr4:43495193-43495134	Sit1	Mus musculus suppression inducing transmembrane adaptor 1 (Sit1), mRNA [NM_019436]	GO:0050863|GO:0016020|GO:0005886|GO:0016021|GO:0019900|GO:0070062|GO:0002376	NM_019436	Mm.31775	54390	55.1512	105.806	6.33264	6.15846	60.2179	50.9274	54.3084	90.674	110.423	116.321	5.76483	6.60051	6.63258	6.07134	6.12102	6.28302
A_55_P2102936	0.0393206	0.130511	2.92118	up	NM_001033225	chr4:33332947-33332888	Pnrc1	Mus musculus proline-rich nuclear receptor coactivator 1 (Pnrc1), mRNA [NM_001033225]	GO:0008150|GO:0003674|GO:0005575	NM_001033225	Mm.27769	108767	12265.8	7113.64	13.9028	12.3563	12325.4	17378	7094.15	4858.44	9446	7036.48	13.4061	14.7937	13.5088	11.8903	12.7573	12.4213
A_55_P2102182	0.795734	0.857119	1.03827	up									2505.22	4051.94	11.6175	11.5634	3556.69	1562.03	2396.95	3844	4549.23	3762.57	11.6392	11.2825	11.9308	11.5238	11.6751	11.4912
A_51_P179241	0.113559	0.236219	1.35329	up	NM_020285	chr7:150256789-150256848	Tssc4	Mus musculus tumor-suppressing subchromosomal transferable fragment 4 (Tssc4), transcript variant 1, mRNA [NM_020285]	GO:0008150|GO:0003674|GO:0005575	NM_020285	Mm.139675	56844	860.124	1199.22	10.1968	9.7603	961.042	848.271	771.059	1211.05	1292.41	1094.19	9.7847	10.444	10.3617	9.85243	9.78294	9.64553
A_51_P101196	0.89876	0.932049	1.02914	up	NM_011189	chr14:56200194-56200253	Psme1	Mus musculus proteasome (prosome, macropain) activator subunit 1 (PA28 alpha) (Psme1), mRNA [NM_011189]	GO:0005515|GO:0000502|GO:0061133|GO:0008537|GO:0019884|GO:0010950|GO:0070062	NM_011189	Mm.830	19186	9870.14	16465.4	13.6669	13.6255	9739.14	9533.45	10337.8	16499	17479.8	15417.3	13.0719	13.8616	14.0672	13.6463	13.6803	13.5498
A_51_P498483	0.0419608	0.135087	2.76862	up	NM_172869	chr4:73834757-73834816	Frmd3	Mus musculus FERM domain containing 3 (Frmd3), transcript variant 1, mRNA [NM_172869]	GO:0008092|GO:0008150|GO:0003674|GO:0005737|GO:0016020|GO:0016021|GO:0005575|GO:0005856|GO:0019898	NM_172869	Mm.221597	242506	61.5425	49.9848	6.4749	5.00573	57.9629	72.5302	54.1343	31.4701	48.4845	69.9999	5.70585	7.09088	6.62798	4.54514	4.93987	5.5322
A_55_P2240823	0.754056	0.826226	1.04427	up	NM_001128606	chr4:131563352-131563293	Epb4.1	Mus musculus erythrocyte protein band 4.1 (Epb4.1), transcript variant 2, mRNA [NM_001128606]	GO:0008092|GO:0005516|GO:0030036|GO:0008360|GO:0030507|GO:0003779|GO:0005634|GO:0015629|GO:0032092|GO:0043234|GO:0005545|GO:0005737|GO:0016020|GO:0030866|GO:0005198|GO:0030863|GO:0005856|GO:0019898	NM_001128606	Mm.30038	269587	10.61	20.2495	3.83834	3.77585	16.9054	6.28883	8.63576	22.8264	18.5779	19.3442	3.86622	3.6499	3.9989	4.07854	3.55904	3.68998
A_51_P124345	0.166741	0.29706	1.1992	up	NM_153166	chr17:29294933-29294874	Cpne5	Mus musculus copine V (Cpne5), mRNA [NM_153166]	GO:0043005|GO:0008150|GO:0003674|GO:0043025|GO:0070062	NM_153166	Mm.39905	240058	176.417	302.39	7.95696	7.69488	235.867	138.434	154.949	282.864	276.107	348.2	7.77126	7.98747	8.11216	7.71696	7.47836	7.88933
A_55_P2085195	0.175761	0.306826	1.51888	up	NM_009297	chr11:78038157-78038098	Supt6	Mus musculus suppressor of Ty 6 (Supt6), mRNA [NM_009297]	GO:0005515|GO:0006397|GO:0008380|GO:0006355|GO:0006357|GO:0045191|GO:0003723|GO:0061086|GO:0016788|GO:0005634|GO:0050684|GO:0003676|GO:0003677|GO:0006351|GO:0042393|GO:0006139|GO:0032784|GO:0032968|GO:0006810|GO:0051028|GO:0010793|GO:0051147	NM_009297	Mm.20755	20926	16.2402	23.7928	4.57104	3.96804	18.2675	13.5821	16.8711	20.4625	32.4609	18.4549	3.98862	4.75746	4.96705	3.93305	4.35683	3.61423
A_51_P359237	0.1353	0.262212	1.48338	up	NM_025439	chr1:137931523-137931582	Tmem9	Mus musculus transmembrane protein 9 (Tmem9), transcript variant 2, mRNA [NM_025439]	GO:0008150|GO:0003674|GO:0016020|GO:0005770|GO:0006810|GO:0016021|GO:0005764|GO:0005768	NM_025439	Mm.41773	66241	1469.67	1849.58	10.9537	10.3848	1554.76	1393.42	1460.84	2138.72	1536.11	1873.9	10.4716	11.1245	11.265	10.6672	10.0449	10.4424
A_55_P1974134	0.941768	0.961467	1.00825	up	NM_026729	chr11:115272168-115272227	Ict1	Mus musculus immature colon carcinoma transcript 1 (Ict1), mRNA [NM_026729]	GO:0005739|GO:0070126|GO:0016787|GO:0016150|GO:0006415|GO:0004045|GO:0006412|GO:0003747|GO:0005762	NM_026729	Mm.271062	68572	1773.08	3155.28	11.1971	11.1852	2224.74	1749.27	1345.23	3365.77	3231.82	2868.25	10.9933	11.4536	11.1443	11.3215	11.1456	11.0885
A_51_P125260	0.0467457	0.143519	1.93681	up	NM_177470	chr18:74965691-74965750	Acaa2	Mus musculus acetyl-Coenzyme A acyltransferase 2 (mitochondrial 3-oxoacyl-Coenzyme A thiolase) (Acaa2), mRNA [NM_177470]	GO:0006629|GO:0016747|GO:0006635|GO:0016746|GO:0005743|GO:0071456|GO:0003824|GO:0006084|GO:0005739|GO:0005759|GO:0008152|GO:0006631|GO:0003988|GO:0016740	NM_177470	Mm.245724	52538	30845.1	28896.4	15.3657	14.412	32203.7	26626.9	33704.6	29434.2	28984.2	28270.8	14.7562	15.4292	15.9116	14.4319	14.3779	14.4262
A_55_P2070352	0.064945	0.173027	1.23453	up	NM_007782	chr4:125721478-125721537	Csf3r	Mus musculus colony stimulating factor 3 receptor (granulocyte) (Csf3r), transcript variant 1, mRNA [NM_007782]	GO:0004896|GO:0016020|GO:0030593|GO:0016021|GO:0007155	NM_007782	Mm.271701	12986	16934	22826.5	14.3838	14.0798	24677.2	12262.2	13862.5	20152.1	25637.4	22690.1	14.4052	14.2464	14.4998	13.8988	14.22	14.1206
A_51_P497317	0.0267831	0.106418	1.78661	up	NM_146008	chr10:84076719-84076778	Tcp11l2	Mus musculus t-complex 11 (mouse) like 2 (Tcp11l2), mRNA [NM_146008]	GO:0008150|GO:0003674|GO:0005575	NM_146008	Mm.296142	216198	275.288	321.352	8.57506	7.73784	380.82	235.549	209.496	209.958	368.055	386.043	8.46793	8.71456	8.5427	7.28067	7.88245	8.0504
A_51_P235002	0.0811165	0.196914	2.81886	up	NM_011598	chr3:10194721-10194055	Fabp9	Mus musculus fatty acid binding protein 9, testis (Fabp9), mRNA [NM_011598]	GO:0005215|GO:0005737|GO:0001669|GO:0006810|GO:0008289	NM_011598	Mm.26654	21884	17.5592	12.8977	4.60363	3.10852	17.3708	24.4218	10.8852	6.18799	10.2183	22.2867	3.90995	5.57521	4.32573	2.54239	2.88748	3.89568
A_51_P110395	0.0131015	0.0745303	1.98096	up	NM_001081340	chr9:110520924-110520983	Setd2	Mus musculus SET domain containing 2 (Setd2), mRNA [NM_001081340]	GO:0010468|GO:0006368|GO:0008168|GO:0005634|GO:0048864|GO:0048701|GO:0032259|GO:0060977|GO:0060669|GO:0097198|GO:0035441|GO:0048568|GO:0034728|GO:0048332|GO:0006298|GO:0006355|GO:0005694|GO:0010452|GO:0001843|GO:0034968|GO:0001525|GO:0060039|GO:0006351|GO:0018023|GO:0018024|GO:0010793|GO:0030900|GO:0001570|GO:0016740|GO:0001763|GO:0016568	NM_001081340	Mm.288949	235626	2606.85	2368.06	11.7453	10.7591	2821.72	2556.45	2442.39	2024.23	2557.76	2522.18	11.3197	11.9619	11.9544	10.5838	10.8003	10.8933
A_51_P391445	0.103404	0.225017	1.30578	up	NM_010511	chr10:19329923-19329982	Ifngr1	Mus musculus interferon gamma receptor 1 (Ifngr1), mRNA [NM_010511]	GO:0019955|GO:0016020|GO:0005783|GO:0014069|GO:0016021|GO:0031982|GO:0030425	NM_010511	Mm.549	15979	9400.4	12202.2	13.5754	13.1905	10878.2	8527.78	8795.18	12325.2	11996.3	12285.1	13.2215	13.6977	13.8069	13.2187	13.1207	13.2321
A_51_P475291	0.306844	0.441554	1.14899	up	NM_022323	chr12:103980742-103980683	Moap1	Mus musculus modulator of apoptosis 1 (Moap1), transcript variant 1, mRNA [NM_022323]	GO:0008625|GO:0043065|GO:0008630|GO:0001844|GO:0006915|GO:0005634|GO:0005741|GO:0042981|GO:0097190|GO:0097192|GO:0005829|GO:0005739|GO:0005737|GO:0090200|GO:0031625	NM_022323	Mm.291222	64113	312.568	530.192	8.7035	8.50313	478.88	255.782	203.041	427.888	657.665	505.022	8.77701	8.83518	8.49831	8.29868	8.76082	8.44988
A_55_P2170454	0.636321	0.732204	1.26625	up	NM_008182	chr9:78178915-78178856	Gsta2	Mus musculus glutathione S-transferase, alpha 2 (Yc2) (Gsta2), mRNA [NM_008182]	GO:0008152|GO:0004364|GO:0016740	NM_008182	Mm.422778	14858	21136.1	21516.7	14.2345	13.8939	46267.9	7668.17	9472.06	21423.5	12021.5	31105.2	15.2439	13.5333	13.9263	13.9818	13.1259	14.5742
A_55_P2131105	0.710618	0.793039	1.06081	up		chr14:31890210-31890151		predicted gene 5459 [Source:MGI Symbol;Acc:MGI:3643518] [ENSMUST00000171235]					2007.09	3414.27	11.3934	11.3083	2186.09	1926.89	1908.28	3268.37	3639.65	3334.77	10.9676	11.5848	11.6278	11.2817	11.3295	11.3136
A_55_P2121682	0.329449	0.464262	1.1532	up	NM_009659	chr11:68983186-68983245	Alox12b	Mus musculus arachidonate 12-lipoxygenase, 12R type (Alox12b), mRNA [NM_009659]	GO:0006629|GO:0006665|GO:0019369|GO:0005506|GO:0019372|GO:0061436|GO:0051213|GO:0046872|GO:0070257|GO:0043651|GO:0010628|GO:0004052|GO:0005737|GO:0070830|GO:0006497|GO:0006631|GO:0016491|GO:0051122|GO:0046513|GO:0016702|GO:0043410|GO:0055114	NM_009659	Mm.340329	11686	31.5554	58.2185	5.48541	5.27977	43.204	21.1957	30.2666	55.3445	67.6516	51.6594	5.27797	5.3877	5.79057	5.35287	5.40514	5.08129
A_55_P1998943	0.142487	0.270151	83.834	up	NM_145211	chr5:121346794-121346735	Oas1a	Mus musculus 2'-5' oligoadenylate synthetase 1A (Oas1a), mRNA [NM_145211]	GO:0005515|GO:0003725|GO:0005737|GO:0001730|GO:0048525|GO:0008270|GO:0005634	NM_145211	Mm.14301	246730	5074.7	12.5089	9.51214	3.12267	10446.4	4772.74	5	8.65288	13.4374	15.4365	13.1696	12.8592	2.50761	2.86846	3.15262	3.34694
A_51_P127756	0.0451159	0.140444	1.67754	up	NM_017397	chr3:105481448-105481389	Ddx20	Mus musculus DEAD (Asp-Glu-Ala-Asp) box polypeptide 20 (Ddx20), mRNA [NM_017397]	GO:0008380|GO:0005515|GO:0006397|GO:0008026|GO:0043065|GO:0048477|GO:0019904|GO:0004386|GO:0050810|GO:0005634|GO:0000122|GO:0000387|GO:0003676|GO:0003677|GO:0005524|GO:0005829|GO:0005737|GO:0016787|GO:0000166|GO:0032797|GO:0017053|GO:0045892|GO:0034719	NM_017397	Mm.272826	53975	616.842	719.227	9.71708	8.97073	668.751	655.266	526.51	630.322	845.535	681.824	9.25311	10.0929	9.80523	8.87337	9.13141	8.90743
A_55_P2039878	0.114058	0.236872	2.99822	up	NM_010327	chr16:18621776-18621717	Gp1bb	Mus musculus glycoprotein Ib, beta polypeptide (Gp1bb), transcript variant 2, mRNA [NM_010327]	GO:0007599|GO:0016020|GO:0007596|GO:0005887|GO:0016021|GO:0007155	NM_010327	Mm.475622	14724	34.2973	25.4557	5.57168	3.98758	20.9465	43.7012	38.2441	12.8414	35.2838	28.242	4.19559	6.39482	6.12463	3.25571	4.46612	4.2409
A_55_P2076989	0.0238559	0.100262	1.91065	up	AK131811	chr8:119533482-119533423	Pkd1l2	polycystic kidney disease 1 like 2 [Source:MGI Symbol;Acc:MGI:2664668] [ENSMUST00000162080]	GO:0001965|GO:0005262|GO:0050982|GO:0016020|GO:0007218|GO:0005509|GO:0070588|GO:0030246|GO:0016021		Mm.159753	76645	633.141	647.876	9.75931	8.82524	663.526	654.039	581.857	639.708	662.403	641.517	9.24548	10.0921	9.94034	8.89602	8.76803	8.81167
A_52_P67643	0.00152695	0.0341035	4.5813	up	AK036004	chr4:147829016-147829075	Mtor	mechanistic target of rapamycin (serine/threonine kinase) [Source:MGI Symbol;Acc:MGI:1928394] [ENSMUST00000123566]	GO:0051219|GO:0045859|GO:0001156|GO:0005515|GO:0016242|GO:0010831|GO:0050731|GO:0005765|GO:0007281|GO:0005764|GO:0031529|GO:0046889|GO:0046777|GO:0032314|GO:0000166|GO:0018105|GO:0030838|GO:0031931|GO:0016301|GO:0032956|GO:0018107|GO:0031669|GO:0043025|GO:0016773|GO:0031932|GO:0016772|GO:0031929|GO:0032868|GO:0005979|GO:0070438|GO:0005794|GO:0019904|GO:0006950|GO:0016310|GO:0045792|GO:0051496|GO:…		Mm.21158	56717	656.732	291.092	9.80922	7.61346	720.871	615.367	633.959	216.433	297.882	358.962	9.36236	10.0029	10.0624	7.32789	7.57783	7.93467
A_51_P306658	0.0856785	0.202843	1.25045	up	NM_133939	chr6:18801737-18803633	Lsm8	Mus musculus LSM8 homolog, U6 small nuclear RNA associated (S. cerevisiae) (Lsm8), mRNA [NM_133939]	GO:0008380|GO:0006397|GO:0008150|GO:0030529|GO:0003723|GO:0005681|GO:0005634|GO:0005575	NM_133939	Mm.275158	76522	716.344	1052.25	9.88417	9.56172	982.852	684.712	481.469	976.527	1152.56	1027.67	9.81425	10.1534	9.68487	9.52756	9.61169	9.54592
A_55_P1978810	0.376696	0.508869	1.21515	up	NM_001080387	chr4:135419928-135419987	Srsf10	Mus musculus serine/arginine-rich splicing factor 10 (Srsf10), transcript variant 2, mRNA [NM_001080387]	GO:0008380|GO:0006397|GO:0006355|GO:0048025|GO:0003723|GO:0006376|GO:0005623|GO:0005634|GO:0003676|GO:0005622|GO:0006406|GO:0000166|GO:0000398|GO:0000375|GO:0016482|GO:0005654|GO:0051082	NM_001080387	Mm.10229	14105	56.6042	100.228	6.36999	6.08886	62.6812	50.9811	56.1503	101.523	103.95	95.2108	5.82585	6.6027	6.68142	6.23489	6.04034	5.99134
A_55_P2087989	0.0958683	0.215364	1.82442	up	NM_177139	chr2:50044269-50044328	Lypd6	Mus musculus LY6/PLAUR domain containing 6 (Lypd6), transcript variant 1, mRNA [NM_177139]	GO:0008150|GO:0003674|GO:0005576|GO:0005575	NM_177139	Mm.130607	320343	69.377	80.1894	6.61196	5.74452	82.0254	43.8153	82.2902	98.5134	63.3845	78.6703	6.21713	6.39785	7.2209	6.19669	5.31843	5.71844
A_55_P2105963	0.0514601	0.151592	4.87411	up	NM_172435	chrX:104300217-104300276	P2ry10	Mus musculus purinergic receptor P2Y, G-protein coupled 10 (P2ry10), mRNA [NM_172435]	GO:0007165|GO:0016020|GO:0007186|GO:0005886|GO:0045028|GO:0004930|GO:0016021|GO:0004871	NM_172435	Mm.74639	78826	754.994	310.504	9.87684	7.59171	402.837	1156.47	705.677	208.725	200.702	522.085	8.54222	10.8655	10.2228	7.27105	7.00528	8.49878
A_52_P496870	0.0530406	0.154396	2.1677	up	NM_025521	chr10:79782121-79782062	2310011J03Rik	Mus musculus RIKEN cDNA 2310011J03 gene (2310011J03Rik), mRNA [NM_025521]	GO:0008150|GO:0003674|GO:0005575	NM_025521	Mm.383824	66374	329.025	311.315	8.8577	7.74154	280.572	344.474	362.031	295.385	331.196	307.365	8.0385	9.23351	9.30111	7.77792	7.7323	7.71439
A_52_P256279	0.0723278	0.183925	1.31019	up	NM_173026	chr16:56008005-56008064	Zbtb11	Mus musculus zinc finger and BTB domain containing 11 (Zbtb11), mRNA [NM_173026]	GO:0008150|GO:0003674|GO:0005634|GO:0046872	NM_173026	Mm.282814	271377	96.0782	141.549	6.98209	6.59232	162.483	66.067	59.6842	146.573	145.574	132.499	7.22845	6.95226	6.76555	6.76479	6.53643	6.47572
A_52_P306305	0.00197202	0.036323	3.96709	up	NM_001035533	chr4:57905932-57905991	Akap2	Mus musculus A kinase (PRKA) anchor protein 2 (Akap2), transcript variant 1, mRNA [NM_001035533]	GO:0043234|GO:0008104|GO:0019904|GO:0007178|GO:0007015|GO:0051018|GO:0051291	NM_001035533	Mm.467752	11641	3619.76	1601.81	12.1628	10.1747	4427.38	4053.68	2378.23	1623.62	1364.51	1817.3	11.9562	12.6113	11.9209	10.2732	9.86034	10.3906
A_51_P225903	0.338395	0.473175	2.67051	up	NM_173070	chr3:92304254-92304195	Sprr4	Mus musculus small proline-rich protein 4 (Sprr4), mRNA [NM_173070]	GO:0008150|GO:0003674|GO:0005737|GO:0031424|GO:0005575	NM_173070	Mm.246590	229562	31.9143	20.3512	5.10864	3.69152	5.51531	55.9664	34.2611	9.49652	28.4432	23.114	2.64792	6.72346	5.95453	2.95845	4.16956	3.94656
A_55_P2106763	0.698077	0.783483	1.11294	up	NM_025831	chr13:34719769-34719710	Pxdc1	Mus musculus PX domain containing 1 (Pxdc1), mRNA [NM_025831]	GO:0008150|GO:0003674|GO:0005575|GO:0035091	NM_025831	Mm.28943	66895	1760.03	2359.64	10.9087	10.7544	3385.05	1148.37	746.679	2256.51	2715.05	2107.35	11.5622	10.8527	10.3113	10.7426	10.8925	10.6281
A_55_P2125144	0.0242435	0.1012	1.97278	up		chr3:032647763-032647822		NDUB5_MOUSE (Q9CQH3) NADH dehydrogenase [ubiquinone] 1 beta subcomplex subunit 5, mitochondrial precursor (NADH-ubiquinone oxidoreductase SGDH subunit) (Complex I-SGDH) (CI-SGDH) , partial (71%) [TC1718914]					64.8898	71.8161	6.55798	5.57774	74.4915	63.9826	56.1954	54.09	85.5966	75.7615	6.08426	6.90723	6.68244	5.3246	5.75338	5.65526
A_55_P2201866	0.00471995	0.0491234	1.43059	up	AK019096	chr1:16594762-16594703	2310047N11Rik	Mus musculus adult male tongue cDNA, RIKEN full-length enriched library, clone:2310047N11 product:unclassifiable, full insert sequence. [AK019096]			Mm.405083	78381	296.34	418.824	8.67885	8.16224	410.868	242.585	235.566	356.671	484.885	414.915	8.57236	8.75663	8.70757	8.04382	8.29306	8.14984
A_52_P217437	0.182454	0.313721	1.37183	up	NM_001042615	chr5:36006717-36006658	Htra3	Mus musculus HtrA serine peptidase 3 (Htra3), transcript variant 2, mRNA [NM_001042615]	GO:0005515|GO:0004252|GO:0005576|GO:0003824|GO:0001558|GO:0030514|GO:0004175|GO:0016787|GO:0006508|GO:0008236|GO:0008233|GO:0030512|GO:0005520	NM_001042615	Mm.274255	78558	76.7838	115.196	6.73649	6.28039	98.5159	45.3369	86.4986	97.4337	135.461	112.692	6.48822	6.4387	7.28257	6.17922	6.42319	6.23877
A_55_P2072722	0.208732	0.342192	1.1116	up	XM_006543771	chr3:87364425-87364484	Etv3l	PREDICTED: Mus musculus ets variant gene 3-like (Etv3l), transcript variant X1, mRNA [XM_006543771]		XM_006543771		546801	40.6457	73.6337	5.783	5.63037	66.1727	26.0764	29.6879	70.2395	83.5321	67.1294	5.90951	5.67937	5.76011	5.69797	5.71541	5.47772
A_51_P385812	0.120973	0.245076	4.74019	up	NM_008352	chr11:44227121-44227180	Il12b	Mus musculus interleukin 12b (Il12b), mRNA [NM_008352]	GO:0005515|GO:0032693|GO:0032819|GO:0005615|GO:0042803|GO:0032816|GO:0042802|GO:0051607|GO:0030101|GO:0044130|GO:0002323|GO:0045519|GO:0032729|GO:0004896|GO:0046982|GO:0032725|GO:0032760|GO:0042164|GO:0050671|GO:0042832|GO:0005125|GO:0005126|GO:0045785|GO:0071346|GO:0002230|GO:0051142|GO:0070743|GO:0008083|GO:0002862|GO:0032733|GO:0042523|GO:0032735|GO:0042520|GO:0042093|GO:0042104|GO:0005737|GO:…	NM_008352	Mm.239707	16160	71.9719	23.7076	6.16624	3.9213	24.5852	159.16	32.1708	17.0921	18.1788	35.8519	4.43263	8.1905	5.8756	3.66344	3.52551	4.57495
A_55_P1992470	0.279376	0.415004	1.22482	up		chr15:018094184-018094243							11446.7	16008.3	13.8772	13.5846	12609.2	10885.3	10845.7	16908.8	16883.6	14232.4	13.4342	14.0606	14.1368	13.6894	13.6185	13.446
A_51_P426276	0.275765	0.411615	1.53449	up	AF267660	chr11:94888039-94887980	Pdk2	Mus musculus pyruvate dehydrogenase kinase 2 (Pdk2) mRNA, complete cds. [AF267660]	GO:0008286|GO:0005515|GO:0031670|GO:0005967|GO:0010565|GO:0032403|GO:0006885|GO:0010906|GO:0042803|GO:0005739|GO:0000166|GO:0018105|GO:0016301|GO:0006006|GO:0045254|GO:0004740|GO:0010510|GO:0046982|GO:0005975|GO:0042593|GO:0005524|GO:0006111|GO:0016310|GO:0072332|GO:0004674|GO:0034614|GO:0006468|GO:0016740		Mm.29768	18604	66.8825	92.285	6.56496	5.94721	56.2623	55.5402	88.845	77.5438	110.495	88.8161	5.66627	6.71375	7.31487	5.83235	6.12185	5.88743
A_51_P201945	0.742874	0.817472	1.06317	up	NM_025747	chr8:47280531-47280590	4933411K20Rik	Mus musculus RIKEN cDNA 4933411K20 gene (4933411K20Rik), mRNA [NM_025747]	GO:0008150|GO:0003674|GO:0005575	NM_025747	Mm.133623	66756	245.802	486.457	8.45482	8.36645	296.9	220.235	220.271	342.039	587.379	529.952	8.12357	8.62692	8.61397	7.9904	8.5882	8.52074
A_51_P394833	0.161132	0.291587	1.40589	up	NM_001081300	chr18:84182072-84182013	Tshz1	Mus musculus teashirt zinc finger family member 1 (Tshz1), mRNA [NM_001081300]	GO:0005515|GO:0010468|GO:0006355|GO:0003700|GO:0005634|GO:0007275|GO:0009952|GO:0003677|GO:0006351|GO:0046872|GO:0043565|GO:0042474|GO:0060023	NM_001081300	Mm.102136	110796	1505.43	1761.98	10.8158	10.3243	2558.61	747.021	1210.66	1548.52	1906.42	1831.01	11.1807	10.2659	11.0008	10.2055	10.3647	10.4027
A_51_P365656	0.589276	0.694897	1.08737	up	NM_029649	chr11:102014068-102014009	Tmem101	Mus musculus transmembrane protein 101 (Tmem101), mRNA [NM_029649]	GO:0007165|GO:0016020|GO:0016021|GO:0005575|GO:0004871|GO:0043123	NM_029649	Mm.46529	76547	157.707	303.612	7.81176	7.69091	203.825	130.219	139.077	343.621	311.271	255.943	7.56382	7.91078	7.96068	7.99639	7.64221	7.43415
A_55_P2054157	0.176425	0.307409	1.2601	up	NM_008300	chr11:53075144-53075085	Hspa4	Mus musculus heat shock protein 4 (Hspa4), mRNA [NM_008300]	GO:0005515|GO:0005811|GO:0043066|GO:0009408|GO:0006950|GO:0005634|GO:0045040|GO:0032403|GO:0005524|GO:0043392|GO:0032092|GO:0005829|GO:0005739|GO:0010628|GO:0005737|GO:0000166|GO:0010629|GO:0001085|GO:0060548|GO:0001933|GO:0051131|GO:0033613|GO:0070062	NM_008300	Mm.239865	15525	7940.88	10700.6	13.331	12.9974	9016.61	8310.47	6495.57	10107.3	11513.5	10480.8	12.9615	13.6481	13.3832	12.9334	13.0636	12.9953
A_55_P2294224	0.00786292	0.0599875	1.71649	up	NM_001166501	chr1:141067075-141067133	Dennd1b	Mus musculus DENN/MADD domain containing 1B (Dennd1b), transcript variant 1, mRNA [NM_001166501]	GO:0005085|GO:0017112|GO:0032313|GO:0005737|GO:0006810|GO:0031410|GO:0005575|GO:0015031	NM_001166501	Mm.337604	329260	52.0579	65.2296	6.22286	5.44339	69.4627	41.3025	45.4083	52.1319	76.9951	66.5618	5.97616	6.31468	6.37773	5.26669	5.60162	5.46187
A_55_P1953387	0.257148	0.393078	1.37718	up	NM_001272097	chr3:10016185-10016244	Fabp5	Mus musculus fatty acid binding protein 5, epidermal (Fabp5), transcript variant 2, mRNA [NM_001272097]	GO:0006629|GO:0005215|GO:0005737|GO:0005504|GO:0015758|GO:0006810|GO:0006006|GO:0070062|GO:0008289|GO:0006656	NM_001272097	Mm.741	16592	1468.93	1996.57	10.9559	10.4941	1480.95	1452.53	1473.32	1751.19	1700.52	2538.01	10.4006	11.1902	11.2768	10.3852	10.1954	10.9018
A_52_P200265	0.09341	0.212239	1.44517	up	NM_020042	chr17:49594644-49594703	Mocs1	Mus musculus molybdenum cofactor synthesis 1 (Mocs1), transcript variant 1, mRNA [NM_020042]	GO:0032324|GO:0051539|GO:0051536|GO:0000166|GO:0006777|GO:0019008|GO:0005575|GO:0005525|GO:0003824|GO:0046872|GO:0016829	NM_020042	Mm.22256	56738	3578.9	4293.88	12.1679	11.6367	4572.49	2839.33	3324.89	5356.35	3588.52	3936.76	11.999	12.1045	12.4002	12.0306	11.3114	11.5681
A_51_P123510	0.734337	0.811099	1.05825	up	NM_030739	chr7:5361595-5361536	Vmn1r58	Mus musculus vomeronasal 1 receptor 58 (Vmn1r58), mRNA [NM_030739]	GO:0008150|GO:0003674|GO:0005575	NM_030739	Mm.261621	81014	10.5686	18.8189	3.75133	3.66965	18.5224	5.02488	8.15847	18.0149	20.825	17.6168	4.00952	3.32417	3.9203	3.74213	3.72469	3.54214
A_55_P2087205	0.099427	0.219983	1.41142	up	AK020648	chr4:138748210-138748151	9530077C14Rik	Mus musculus adult male urinary bladder cDNA, RIKEN full-length enriched library, clone:9530077C14 product:unclassifiable, full insert sequence. [AK020648]	GO:0008150|GO:0003674|GO:0005575		Mm.118809	78454	178.829	264.67	7.99967	7.50252	205.961	145.605	184.921	237.003	272.133	284.873	7.57844	8.05723	8.36333	7.46427	7.45256	7.59073
A_55_P1964682	0.0232609	0.098987	1.64105	up	NR_003279		Rn28s1	Mus musculus 28S ribosomal RNA (Rn28s1), ribosomal RNA [NR_003279]		NR_003279		236598	4650.03	4651.99	12.4849	11.7703	6945.58	3063.07	3941.43	4468.28	4151.07	5336.61	12.6033	12.2038	12.6476	11.7549	11.5332	12.0228
A_51_P286995	0.0428237	0.136585	1.60276	up	NM_025653	chr16:13678105-13678164	3110001I22Rik	Mus musculus RIKEN cDNA 3110001I22 gene (3110001I22Rik), mRNA [NM_025653]	GO:0008150|GO:0003674|GO:0005575	NM_025653	Mm.223689	66598	105.079	138.742	7.24301	6.56246	122.34	89.2821	103.614	134.435	136.814	144.976	6.80456	7.38526	7.53922	6.64112	6.4387	6.60756
A_55_P2020153	0.367057	0.500122	1.0832	up	NM_007808	chr6:50515151-50515092	Cycs	Mus musculus cytochrome c, somatic (Cycs), mRNA [NM_007808]	GO:0005739|GO:0045155|GO:0008635|GO:0006309|GO:0009055|GO:0006915|GO:0005634|GO:0042743|GO:0020037|GO:0005829	NM_007808	Mm.35389	13063	37589.2	61960.9	15.5935	15.4782	53242.3	32170.6	27354.8	65345.5	65338.5	55198.6	15.4795	15.7782	15.5226	15.5074	15.5727	15.3543
A_51_P101660	0.429038	0.557051	1.06189	up	NM_025818	chr11:72893544-72893603	1200014J11Rik	Mus musculus RIKEN cDNA 1200014J11 gene (1200014J11Rik), mRNA [NM_025818]	GO:0008150|GO:0000166|GO:0005575	NM_025818	Mm.41903	66874	148.685	286.246	7.69708	7.61045	211.598	125.274	109.183	243.985	323.311	291.443	7.61663	7.85986	7.61474	7.50699	7.6974	7.62694
A_51_P211491	0.0161941	0.0829679	1.46566	up	NM_010368	chr5:130465192-130465133	Gusb	Mus musculus glucuronidase, beta (Gusb), mRNA [NM_010368]	GO:0004566|GO:0016787|GO:0005975|GO:0005783|GO:0016798|GO:0008152|GO:0030246|GO:0005764|GO:0004553|GO:0070062|GO:0043231	NM_010368	Mm.3317	110006	654.105	841.246	9.76643	9.21487	885.09	600.418	476.807	896.486	854.644	772.608	9.65692	9.97135	9.67101	9.39735	9.14927	9.098
A_55_P2142156	0.000363919	0.0246886	1.42887	up	XM_001474528	chrX:67679678-67679619	Gm16441	PREDICTED: Mus musculus predicted pseudogene 16441 (Gm16441), mRNA [XM_001474528]		XM_001474528		628012	207.702	288.524	8.1453	7.63043	318.251	150.266	154.59	271.756	297.533	296.283	8.21967	8.10746	8.10878	7.6629	7.57652	7.65187
A_55_P2063237	0.0233318	0.099109	2.51272	up	NM_001085390	chr19:53615682-53615741	Dusp5	Mus musculus dual specificity phosphatase 5 (Dusp5), mRNA [NM_001085390]	GO:0000188|GO:0001706|GO:0006470|GO:0016787|GO:0016311|GO:0004721|GO:0008138|GO:0045892|GO:0017017|GO:0004725	NM_001085390	Mm.482424	240672	72.1907	64.0169	6.71625	5.38699	74.8636	74.77	66.9384	45.3744	84.6328	62.0436	6.09288	7.13309	6.92277	5.06525	5.73571	5.36003
A_51_P366061	0.0247489	0.102281	1.74522	up	NM_007984	chr5:143734308-143734367	Fscn1	Mus musculus fascin homolog 1, actin bundling protein (Strongylocentrotus purpuratus) (Fscn1), mRNA [NM_007984]	GO:0005515|GO:0001725|GO:0030054|GO:0030036|GO:0005886|GO:0003779|GO:0042995|GO:0030175|GO:0015629|GO:0001726|GO:0030425|GO:0030027|GO:0030426|GO:0005902|GO:0005737|GO:0051015|GO:0016477|GO:0048870|GO:0008144|GO:0071437|GO:0030674|GO:0005856|GO:0051017|GO:0070062	NM_007984	Mm.289707	14086	24.8189	30.6242	5.17874	4.37533	29.8792	21.4157	23.1617	28.8396	31.6902	31.3428	4.72388	5.39986	5.41247	4.41699	4.32334	4.38565
A_55_P2177105	0.0925899	0.211364	1.28152	up		chr1:071760707-071760648							10849	14031.2	13.7336	13.3758	15120.9	8489.51	8936.44	11348.2	16972.4	13773	13.6867	13.6824	13.8317	13.0974	13.6333	13.3966
A_55_P2091153	0.245626	0.381574	1.19166	up	NM_001163855	chr17:34596960-34597019	BC051142	Mus musculus cDNA sequence BC051142 (BC051142), transcript variant 2, mRNA [NM_001163855]	GO:0008150|GO:0003674|GO:0005575	NM_001163855	Mm.73205	407788	180.636	287.97	7.87085	7.61789	308.971	102.794	130.142	258.863	331.51	273.536	8.17932	7.57072	7.86253	7.59527	7.73341	7.52498
A_65_P20799	0.753932	0.826154	1.04576	up	NM_001198571	chr1:60535727-60535786	Abi2	Mus musculus abl-interactor 2 (Abi2), transcript variant 2, mRNA [NM_001198571]	GO:0031209|GO:0017124|GO:0006928|GO:0018108|GO:0042995|GO:0030175|GO:0032403|GO:0030425|GO:0016358|GO:0030027|GO:0005829|GO:0048365|GO:0005737|GO:0016601|GO:0005913|GO:0016477|GO:0008154|GO:0007611|GO:0043010|GO:2000601|GO:0005856|GO:0070064|GO:0031625	NM_001198571	Mm.212066	329165	61.135	112.63	6.30446	6.23991	107.088	34.4274	41.8897	90.8224	117.235	129.833	6.60236	6.05804	6.25298	6.07462	6.20279	6.44232
A_55_P2073825	0.376722	0.508879	1.55152	up	NM_033039	chr5:144780735-144780676	Ocm	Mus musculus oncomodulin (Ocm), mRNA [NM_033039]	GO:0043234|GO:0005737|GO:0046982|GO:0051480|GO:0005509|GO:0005634|GO:0046872|GO:0042803	NM_033039	Mm.270533	18261	108.587	157.789	7.2533	6.61961	85.775	142.152	97.8332	101.281	259.165	112.921	6.28692	8.02123	7.45175	6.23122	7.38475	6.24287
A_52_P102002	0.0298584	0.112444	1.69317	up	NM_027323	chr5:112767057-112766998	Srrd	Mus musculus SRR1 domain containing (Srrd), mRNA [NM_027323]	GO:0008150|GO:0003674|GO:0048511|GO:0005575	NM_027323	Mm.486479	70118	154.385	188.792	7.76944	7.00971	188.868	162.029	112.259	178.77	196.327	191.279	7.44013	8.2104	7.65778	7.04068	6.97559	7.01286
A_55_P2114908	0.738694	0.814739	1.09349	up	NM_001162947	chr8:23238818-23238759	Nek3	Mus musculus NIMA (never in mitosis gene a)-related expressed kinase 3 (Nek3), transcript variant 1, mRNA [NM_001162947]	GO:0042995|GO:0005524|GO:0046872|GO:0016310|GO:0005737|GO:0007049|GO:0007067|GO:0004672|GO:0000166|GO:0004674|GO:0016301|GO:0006468|GO:0016740|GO:0051301|GO:0016772	NM_001162947	Mm.41413	23954	1447.91	2274.37	10.8297	10.7008	1890.66	748.346	1704.71	1932.15	2558.06	2332.91	10.7495	10.2688	11.471	10.523	10.8006	10.7788
A_55_P2092776	0.883137	0.921516	1.02149	up	NM_001199337	chrX:91639559-91639618	Apoo	Mus musculus apolipoprotein O (Apoo), transcript variant 2, mRNA [NM_001199337]	GO:0005739|GO:0008150|GO:0003674	NM_001199337	Mm.379156	68316	1384.01	2492.7	10.8634	10.8327	1596.46	1329.85	1225.71	2416.99	2879.37	2181.73	10.5127	11.0585	11.0189	10.8455	10.9758	10.6769
A_55_P2038152	0.899483	0.932495	1.03906	up	NM_183173	chr11:53291831-53291772	Sowaha	Mus musculus sosondowah ankyrin repeat domain family member A (Sowaha), mRNA [NM_183173]	GO:0008150|GO:0003674|GO:0005575	NM_183173	Mm.145208	237761	45.9964	97.6552	6.04643	5.99116	49.6269	33.0195	55.3429	64.9464	131.937	96.0826	5.47651	6.00305	6.65974	5.59254	6.37981	6.00113
A_55_P2180531	0.0900064	0.20803	1.78873	up	NM_027498	chr9:46029257-46029316	Sik3	Mus musculus SIK family kinase 3 (Sik3), mRNA [NM_027498]	GO:0005515|GO:0000287|GO:0048705|GO:0005524|GO:0046872|GO:0032880|GO:0016310|GO:0001958|GO:0005737|GO:0004672|GO:0035264|GO:0000166|GO:0004674|GO:0016301|GO:0060351|GO:0006468|GO:0035108|GO:0016740|GO:0016772	NM_027498	Mm.219459	70661	59.26	71.7871	6.43239	5.59346	57.2802	61.6844	58.8153	60.8708	78.5028	75.9876	5.68884	6.8624	6.74594	5.49142	5.62891	5.66005
A_51_P258620	0.0254863	0.103829	1.92828	up	NM_029391	chr7:27959494-27957973	Rab4b	Mus musculus RAB4B, member RAS oncogene family (Rab4b), mRNA [NM_029391]	GO:0005739|GO:0048471|GO:0016020|GO:0005886|GO:0000166|GO:0046323|GO:0007264|GO:0032593|GO:0006810|GO:0055037|GO:0015031|GO:0005525	NM_029391	Mm.482114	19342	249.593	269.806	8.48173	7.53441	265.033	253.436	230.31	245.99	275.93	287.498	7.94827	8.82147	8.67543	7.5198	7.47745	7.60598
A_52_P650108	0.0128125	0.0738601	2.00638	up	NM_011274	chr7:38745948-38745889	Uri1	Mus musculus URI1, prefoldin-like chaperone (Uri1), mRNA [NM_011274]	GO:0006355|GO:0006357|GO:0006366|GO:0001106|GO:0016272|GO:0004864|GO:0005634|GO:2001243|GO:0042995|GO:0000122|GO:0009615|GO:0001558|GO:0006351|GO:0005739|GO:0005737|GO:0071363|GO:0006457|GO:0071383|GO:0010923|GO:0003682|GO:0005665|GO:0051082	NM_011274	Mm.387220	19777	538.062	536.808	9.53079	8.5262	621.297	505.051	487.837	425.772	563.111	621.541	9.15039	9.73845	9.70355	8.29027	8.52406	8.76428
A_51_P125345	0.00568828	0.0531199	1.5158	up	NM_026822	chr3:92459638-92459579	Lce1b	Mus musculus late cornified envelope 1B (Lce1b), mRNA [NM_026822]	GO:0008150|GO:0003674|GO:0005575	NM_026822	Mm.291769	68720	715.828	887.097	9.90201	9.30193	952.537	641.848	553.1	794.306	904.069	962.917	9.7701	10.06	9.87589	9.21722	9.24366	9.4449
A_51_P166244	0.000832423	0.0293649	3.95267	up	NM_207530	chr18:12913954-12913895	Osbpl1a	Mus musculus oxysterol binding protein-like 1A (Osbpl1a), transcript variant 1, mRNA [NM_207530]	GO:0005515|GO:0008150|GO:0005737|GO:0015485|GO:0005770|GO:0006869|GO:0006810|GO:0005634|GO:0070062|GO:0008289|GO:0005768	NM_207530	Mm.259470	64291	2110.35	970.38	11.3972	9.41434	3058.46	1508.83	1763.76	782.015	896.305	1232.82	11.4279	11.2398	11.5238	9.19286	9.23026	9.8199
A_51_P408082	0.010554	0.0676296	2.60945	up	NM_009692	chr9:46037921-46037980	Apoa1	Mus musculus apolipoprotein A-I (Apoa1), mRNA [NM_009692]	GO:0005515|GO:0006695|GO:0019915|GO:0060192|GO:0018206|GO:0030300|GO:0010903|GO:0030301|GO:0005615|GO:0042802|GO:0034361|GO:0034365|GO:0015914|GO:0034364|GO:0006810|GO:0034115|GO:0055102|GO:0070062|GO:0006656|GO:0042632|GO:0033344|GO:0060761|GO:0051345|GO:0009986|GO:0051346|GO:0043691|GO:0034366|GO:0051347|GO:0005548|GO:0010804|GO:0043534|GO:0007186|GO:0042157|GO:0055091|GO:0006644|GO:0019899|GO:…	NM_009692	Mm.26743	11806	18317.1	12426.2	14.5836	13.1999	19010	17074	18867.4	12270.8	14241.8	10766.1	14.0158	14.7642	14.9709	13.2122	13.3579	13.0296
A_55_P2174541	0.989081	0.992888	1.00299	up	NM_001013371	chr16:35932944-35932885	Dtx3l	Mus musculus deltex 3-like (Drosophila) (Dtx3l), mRNA [NM_001013371]	GO:0042393|GO:0005737|GO:0004842|GO:0006281|GO:0016874|GO:0008270|GO:0005634|GO:0010390|GO:0046872|GO:0006974|GO:0016568|GO:0006302	NM_001013371	Mm.390852	209200	41.0453	89.2632	5.90205	5.89774	47.7327	38.8004	36.6027	90.5901	105.451	71.7484	5.42097	6.22788	6.05731	6.06812	6.05804	5.56706
A_55_P2189903	0.0208461	0.0936047	3.1658	up	AK083419	chr3:94798447-94798388	A730011C13Rik	Mus musculus 9 days embryo whole body cDNA, RIKEN full-length enriched library, clone:D030005C14 product:unclassifiable, full insert sequence. [AK083419]	GO:0008150|GO:0003674|GO:0005575		Mm.441061	319916	25.3752	17.1534	5.18109	3.51851	24.9899	18.4338	32.7018	12.0722	19.4383	19.9498	4.45271	5.19401	5.89654	3.18803	3.63157	3.73594
A_55_P2104791	0.410637	0.539704	1.19611	up		chr6:047927650-047927591							10079.3	14609.3	13.6975	13.4392	10371.4	9909.87	9956.67	13055.5	16088.5	14683.9	13.1545	13.9263	14.0118	13.3019	13.5318	13.4839
A_55_P2025273	0.025865	0.10463	1.38378	up	NM_026485	chr15:88916893-88916952	Trabd	Mus musculus TraB domain containing (Trabd), mRNA [NM_026485]	GO:0008150|GO:0003674|GO:0005575	NM_026485	Mm.284710	67976	812.055	1090.63	10.0889	9.62031	1067	634.902	734.262	1163.65	1069.82	1038.41	9.93735	10.0461	10.2833	9.79489	9.50248	9.56355
A_51_P382849	0.0242407	0.1012	3.33845	up	NM_010330	chr13:118062731-118062790	Emb	Mus musculus embigin (Emb), mRNA [NM_010330]	GO:0030054|GO:0035879|GO:0016020|GO:0005886|GO:0005887|GO:0045202|GO:0016021|GO:0007155	NM_010330	Mm.274926	13723	606.092	355.023	9.66343	7.92425	451.125	764.264	602.887	304.431	390.629	370.009	8.69951	10.2998	9.99097	7.823	7.96971	7.98004
A_51_P137029	0.00106537	0.0314539	1.91535	up	NM_019588	chr19:38857137-38857196	Plce1	Mus musculus phospholipase C, epsilon 1 (Plce1), mRNA [NM_019588]	GO:0045859|GO:0006629|GO:0005886|GO:0007264|GO:0007200|GO:0007265|GO:0046578|GO:0032835|GO:0005829|GO:0035556|GO:0005622|GO:0005085|GO:0004629|GO:0000187|GO:0005737|GO:0004871|GO:0017016|GO:0008081|GO:0005794|GO:0005509|GO:0016042|GO:0007165|GO:0008277|GO:0007186|GO:0016020|GO:0016787|GO:0004435|GO:0019899	NM_019588	Mm.34031	74055	86.4727	94.5307	6.93874	6.00113	115.741	70.5658	73.1108	86.5249	102.627	94.4402	6.71916	7.04989	7.04717	5.99868	6.02689	5.9778
A_51_P311785	0.0357184	0.124343	1.72699	up	NM_008550	chr5:37198294-37198235	Man2b2	Mus musculus mannosidase 2, alpha B2 (Man2b2), mRNA [NM_008550]	GO:0005975|GO:0005576|GO:0015923|GO:0003824|GO:0005764|GO:0046872|GO:0004553|GO:0016787|GO:0016798|GO:0008152|GO:0030246|GO:0008270|GO:0004559|GO:0006013	NM_008550	Mm.761	17160	284.382	321.348	8.56676	7.7785	410.226	153.15	289.77	272.37	360.267	331.407	8.56774	8.13911	8.99341	7.66622	7.85088	7.81839
A_51_P196158	0.133128	0.259878	1.39133	up	NM_025295	chr14:32481240-32481299	Btd	Mus musculus biotinidase (Btd), mRNA [NM_025295]	GO:0047708|GO:0006807|GO:0016810|GO:0016787|GO:0016811|GO:0006768|GO:0005730|GO:0045177|GO:0043204|GO:0005576	NM_025295	Mm.282679	26363	1190.52	1583.55	10.6427	10.1663	1348.33	975.073	1248.17	1276.04	1787.85	1686.76	10.262	10.6262	11.0399	9.93269	10.2741	10.292
A_52_P25812	0.0405388	0.132694	2.96778	up	NM_001081355	chr4:142721939-142721880	Prdm2	Mus musculus PR domain containing 2, with ZNF domain (Prdm2), transcript variant 1, mRNA [NM_001081355]	GO:0005634|GO:0032355	NM_001081355	Mm.332020	110593	163.037	115.645	7.84416	6.27477	125.125	201.114	162.872	89.3243	142.782	114.829	6.84422	8.50864	8.17961	6.04963	6.50684	6.26785
A_55_P2062262	0.964098	0.976318	1.00394	up	NM_026877	chr11:120570249-120570308	Aspscr1	Mus musculus alveolar soft part sarcoma chromosome region, candidate 1 (human) (Aspscr1), transcript variant 1, mRNA [NM_026877]	GO:0012506|GO:0005515|GO:0048471|GO:0005737|GO:0046324|GO:0016020|GO:0009898|GO:0005634|GO:0042593|GO:0006886|GO:0019898|GO:0005829	NM_026877	Mm.294020	68938	71058.3	129753	16.4859	16.4802	113014	44965.2	55195.4	128310	132005	128942	16.451	16.3023	16.7045	16.451	16.4817	16.508
A_55_P2038362	0.000729708	0.0280365	8.8589	up	NM_145444	chr12:85416634-85416693	Acot5	Mus musculus acyl-CoA thioesterase 5 (Acot5), mRNA [NM_145444]	GO:0047617|GO:0032789|GO:0032788|GO:0006637|GO:0000038|GO:0001676|GO:0016787|GO:0016290|GO:0016790|GO:0005829|GO:0005777	NM_145444	Mm.484019	217698	438.115	105.937	9.21151	6.06438	618.999	370.884	324.463	61.1549	157.195	99.4606	9.14446	9.33647	9.15361	5.49818	6.64409	6.05088
A_55_P2072543	0.414531	0.543427	1.22796	up	NM_009188	chr8:75281185-75281244	Sin3b	Mus musculus transcriptional regulator, SIN3B (yeast) (Sin3b), transcript variant 1, mRNA [NM_009188]	GO:0001741|GO:0005515|GO:0000806|GO:0006355|GO:0000805|GO:0003714|GO:0005634|GO:0045786|GO:0006351|GO:0048738|GO:0005737|GO:0007519|GO:0003682|GO:0030849|GO:0045892	NM_009188	Mm.2137	20467	9.21104	16.3318	3.75073	3.45447	10.5449	10.1249	6.9633	14.198	18.7223	16.075	3.22855	4.33309	3.69056	3.38467	3.57271	3.40604
A_55_P1968193	0.035577	0.12402	1.49506	up	NM_010210	chr14:10702604-10702545	Fhit	Mus musculus fragile histidine triad gene (Fhit), mRNA [NM_010210]	GO:0006355|GO:0005886|GO:0015964|GO:0047710|GO:0006915|GO:0005634|GO:0032435|GO:0003824|GO:0006351|GO:0042802|GO:0005829|GO:0006260|GO:0005737|GO:0072332|GO:0016787|GO:0000166|GO:0031625|GO:0006163|GO:0009117|GO:0016151	NM_010210	Mm.441926	14198	30.1971	43.6845	5.44127	4.86106	39.7192	24.5557	26.3163	33.3016	50.7787	46.9733	5.15006	5.58244	5.5913	4.63178	5.00393	4.94748
A_51_P105380	0.229085	0.364154	1.44428	up	NM_029733	chr16:36257452-36257511	2010005H15Rik	Mus musculus RIKEN cDNA 2010005H15 gene (2010005H15Rik), mRNA [NM_029733]	GO:0010951|GO:0005737|GO:0004869|GO:0005198|GO:0005634|GO:0030674|GO:0002020|GO:0005615|GO:0001533	NM_029733	Mm.327617	76770	20.0018	23.2529	4.50235	3.972	41.4921	9.63846	8.8749	21.1606	27.469	21.1291	5.21888	4.25282	4.03536	3.97851	4.11893	3.81858
A_52_P384901	0.0406566	0.13294	1.40004	up	NM_175639	chr17:72008028-72008087	Wdr43	Mus musculus WD repeat domain 43 (Wdr43), mRNA [NM_175639]	GO:0008150|GO:0005634|GO:0005575	NM_175639	Mm.257762	72515	573.396	755.726	9.53183	9.04637	893.437	466.769	359.982	611.883	888.105	767.19	9.67101	9.63208	9.29241	8.83913	9.21265	9.08733
A_55_P2041121	0.285414	0.421087	1.07986	up	NR_002841	chr9:94770560-94743703	Rn4.5s	Mus musculus 4.5S RNA (Rn4.5s), ribosomal RNA [NR_002841]	GO:0008150|GO:0008143|GO:0005829	NR_002841		19799	53869.4	85115.5	16.0158	15.905	90553.1	35589.4	35465.7	78182.5	91947.6	85216.4	16.127	15.9534	15.967	15.7713	16.0115	15.9321
A_52_P670874	0.245314	0.381253	1.11315	up	NM_019480	chr15:44472212-44472271	Ebag9	Mus musculus estrogen receptor-binding fragment-associated gene 9 (Ebag9), mRNA [NM_019480]	GO:0005794|GO:0016020|GO:0005886|GO:0006915|GO:0016021|GO:0030141|GO:0005925	NM_019480	Mm.287896	55960	1488.25	2302.47	10.8754	10.7208	2342.91	1050.69	1071.15	2065.75	2476.34	2365.31	11.0664	10.7304	10.8294	10.6148	10.7506	10.7969
A_55_P2120466	0.707094	0.790554	1.07995	up	NM_028965	chr11:96628930-96628871	Snx11	Mus musculus sorting nexin 11 (Snx11), mRNA [NM_028965]	GO:0016050|GO:0016020|GO:0006810|GO:0035091|GO:0015031|GO:0006886|GO:0008289|GO:0005768	NM_028965	Mm.270781	74479	117.26	209.287	7.26393	7.15297	195.58	91.5482	64.6517	245.928	182.471	199.463	7.49483	7.42185	6.87512	7.51942	6.86364	7.07583
A_55_P2032034	0.0251998	0.10332	1.32311	up	NM_013684	chr17:15654250-15654309	Tbp	Mus musculus TATA box binding protein (Tbp), mRNA [NM_013684]	GO:0001103|GO:0005515|GO:0006352|GO:0006355|GO:0003700|GO:0005669|GO:0044212|GO:0006366|GO:0005719|GO:0000120|GO:0005634|GO:0006383|GO:0003677|GO:0006351|GO:0005737|GO:0001939|GO:0070491|GO:0005672|GO:0045120|GO:0001940|GO:0045893|GO:0008134	NM_013684	Mm.244820	21374	631.557	897.399	9.72095	9.31702	840.841	589.886	463.943	854.688	954.919	882.591	9.578	9.95011	9.63476	9.32205	9.32205	9.30696
A_55_P2034067	0.516127	0.634138	1.16446	up	NM_001085509	chr4:135371377-135371436	Myom3	Mus musculus myomesin family, member 3 (Myom3), mRNA [NM_001085509]	GO:0008150|GO:0005737|GO:0031430|GO:0042803	NM_001085509	Mm.318639	242702	118.36	192.936	7.25009	7.03043	197.71	57.2553	100.113	226.687	178.801	173.32	7.51397	6.7531	7.48319	7.39628	6.83495	6.86005
A_51_P314107	0.0582506	0.16262	3.62388	up	NM_021347	chr11:98537914-98537973	Gsdma	Mus musculus gasdermin A (Gsdma), mRNA [NM_021347]	GO:0003674|GO:0048471|GO:0005737|GO:0006915	NM_021347	Mm.458085	57911	156.144	62.1846	7.21794	5.3604	348.43	85.0176	34.9845	56.8491	79.517	50.1876	8.34993	7.31785	5.98604	5.39311	5.6481	5.04
A_51_P302149	0.126848	0.252378	1.12364	up	NM_007688	chr12:55960436-55960377	Cfl2	Mus musculus cofilin 2, muscle (Cfl2), mRNA [NM_007688]	GO:0045214|GO:0003779|GO:0005634|GO:0015629|GO:0005615|GO:0046716|GO:0005622|GO:0003674|GO:0005737|GO:0030836|GO:0030042|GO:0007015|GO:0005856|GO:0031674	NM_007688	Mm.276826	12632	518.186	865.772	9.4301	9.26192	757.187	414.504	382.866	743.309	910.234	943.774	9.42765	9.48057	9.38209	9.12214	9.25522	9.40841
A_55_P2121537	0.338265	0.473017	1.18668	up	XR_032431	chrX:151585614-151585555	Gm4997	PREDICTED: Mus musculus predicted gene 4997 (Gm4997), misc_RNA [XR_032431]		XR_032431	Mm.391329	245676	13575.1	19764.5	14.1254	13.8785	15390.4	14047	11287.9	19364.1	19038.4	20891	13.7168	14.4622	14.1972	13.8514	13.7844	13.9997
A_55_P2002205	0.0860141	0.203206	1.93902	up	AK050695	chr5:32304923-32304982	Bre	brain and reproductive organ-expressed protein [Source:MGI Symbol;Acc:MGI:1333875] [ENSMUST00000114514]	GO:0005164|GO:0031572|GO:0006915|GO:0005634|GO:0045739|GO:0000152|GO:0006974|GO:0006302|GO:0070531|GO:0005737|GO:0070552|GO:0006281|GO:0010212|GO:0016568|GO:0031593		Mm.482126	107976	51.3025	57.0719	6.22103	5.2657	46.2804	53.502	54.125	52.1318	60.8446	58.2394	5.37839	6.65723	6.62748	5.26655	5.26655	5.26401
A_55_P2195463	0.137633	0.264777	1.25859	up	NM_145522	chr2:34650752-34650693	Rabepk	Mus musculus Rab9 effector protein with kelch motifs (Rabepk), mRNA [NM_145522]	GO:0005737|GO:0016020|GO:0005886|GO:0043231|GO:0005768	NM_145522	Mm.158705	227746	67.64	114.018	6.59734	6.26554	87.8562	54.0556	61.0083	118.746	122.499	100.81	6.32512	6.67062	6.79629	6.45406	6.27171	6.07085
A_55_P1988273	6.13901e-05	0.0173213	1.93545	up	NM_009543	chr6:71460793-71460852	Rnf103	Mus musculus ring finger protein 103 (Rnf103), mRNA [NM_009543]	GO:0004842|GO:0016567|GO:0016020|GO:0005783|GO:0016874|GO:0008270|GO:0016021|GO:0030433|GO:0046872	NM_009543	Mm.422969	22644	2476.7	2232.7	11.6301	10.6774	3503.02	1991.74	1935.34	2128.52	2241.56	2328.02	11.6171	11.6238	11.6494	10.6604	10.5949	10.7771
A_51_P121412	0.067208	0.17645	1.75967	up	NM_026404	chr18:36842932-36842991	Slc35a4	Mus musculus solute carrier family 35, member A4 (Slc35a4), transcript variant 1, mRNA [NM_026404]	GO:0008150|GO:0003674|GO:0005794|GO:0016020|GO:0000139|GO:0006810|GO:0008643|GO:0005351|GO:0016021|GO:0005575	NM_026404	Mm.273350	67843	273.098	323.909	8.60375	7.78845	272.071	300.971	246.253	295.917	378.064	297.744	7.98912	9.05162	8.77052	7.78034	7.92483	7.66018
A_51_P115817	0.0159951	0.0823913	1.24683	up	NM_023884	chr1:158739163-158739104	Ralgps2	Mus musculus Ral GEF with PH domain and SH3 binding motif 2 (Ralgps2), transcript variant 2, mRNA [NM_023884]	GO:0005622|GO:0005085|GO:0008150|GO:0003674|GO:0005737|GO:0016020|GO:0005886|GO:0007264|GO:0005575	NM_023884	Mm.28376	78255	1062.72	1546.01	10.4575	10.1392	1463.47	816.751	907.954	1482.11	1576.57	1579.36	10.3794	10.3901	10.6029	10.1424	10.0828	10.1923
A_51_P116431	0.21426	0.348455	1.37666	up	XM_006538747	chr4:133217198-133217139	Pigv	phosphatidylinositol glycan anchor biosynthesis, class V [Source:MGI Symbol;Acc:MGI:2442480] [ENSMUST00000062118]	GO:0000030|GO:0016758|GO:0016020|GO:0016757|GO:0005783|GO:0005789|GO:0016021|GO:0016740|GO:0006506	XM_006538747	Mm.217004	230801	8.82377	14.2495	3.73044	3.26926	9.36859	8.78179	8.32092	12.4513	16.6069	13.6903	3.12468	4.11893	3.94771	3.22224	3.38825	3.1973
A_55_P2009792	0.541866	0.655719	1.08994	up	NM_010413	chrX:7507320-7507261	Hdac6	Mus musculus histone deacetylase 6 (Hdac6), transcript variant 1, mRNA [NM_010413]	GO:0008017|GO:0005515|GO:0032418|GO:0006511|GO:0043130|GO:0070301|GO:0010469|GO:0008013|GO:0051879|GO:0032129|GO:0006886|GO:0051788|GO:0070201|GO:0071218|GO:0000209|GO:0034983|GO:0048487|GO:0009636|GO:0070848|GO:0043241|GO:0043242|GO:0031078|GO:0043234|GO:0070845|GO:0070846|GO:0000118|GO:0070840|GO:0070842|GO:0008270|GO:0034739|GO:0031593|GO:0005881|GO:0048471|GO:0042826|GO:0046970|GO:0005634|GO:…	NM_010413	Mm.29854	15185	155.546	296.251	7.79115	7.6669	192.865	148.412	125.362	295.952	305.834	286.967	7.47555	8.09019	7.80773	7.78073	7.61755	7.60242
A_55_P2064442	0.886401	0.923472	1.01177	up	NM_019402	chr14:55516049-55516108	Pabpn1	Mus musculus poly(A) binding protein, nuclear 1 (Pabpn1), mRNA [NM_019402]	GO:0006397|GO:0006378|GO:0005737|GO:0000166|GO:0016973|GO:0030529|GO:0003723|GO:0008143|GO:0005634|GO:0003676	NM_019402	Mm.7723	54196	3489.06	5824.64	12.1336	12.1167	4425.82	2884.08	3157.27	5701.02	6328.62	5444.29	11.9558	12.1274	12.3176	12.1167	12.1811	12.0523
A_52_P359965	0.00143162	0.0334318	2.0476	up	NM_007754	chr11:76595809-76595750	Cpd	Mus musculus carboxypeptidase D (Cpd), mRNA [NM_007754]	GO:0005802|GO:0005634|GO:0046872|GO:0043231|GO:0016020|GO:0016787|GO:0004180|GO:0006508|GO:0008233|GO:0008270|GO:0016021|GO:0008237|GO:0070062|GO:0004181	NM_007754	Mm.276736	12874	494.438	447.455	9.30323	8.26929	817.845	322.052	343.418	447.3	469.212	425.853	9.54068	9.14233	9.22668	8.36898	8.24585	8.19305
A_55_P2174339	0.931176	0.954563	1.03421	up	DQ141211	chr2:52595351-52595292	Stam2	signal transducing adaptor molecule (SH3 domain and ITAM motif) 2 [Source:MGI Symbol;Acc:MGI:1929100] [ENSMUST00000155516]	GO:0005515|GO:0005737|GO:0016020|GO:0006810|GO:0005634|GO:0015031|GO:0006886|GO:0043231|GO:0005768		Mm.263639	56324	2150.46	3402.01	11.3365	11.2879	2290.6	998.126	3162.67	4006.63	3011.36	3188.05	11.0295	10.6583	12.3216	11.5801	11.0427	11.2409
A_55_P2302542	0.782149	0.847324	1.09404	up	NR_045477	chr11:98212154-98212095	1700003D09Rik	Mus musculus RIKEN cDNA 1700003D09 gene (1700003D09Rik), long non-coding RNA [NR_045477]		NR_045477	Mm.398308	69338	14.0295	21.6853	3.98947	3.8598	28.6582	8.21242	5.21794	24.4926	23.2609	17.3026	4.65896	4.01683	3.29263	4.17899	3.88199	3.51843
A_55_P2166995	0.584593	0.691527	1.04519	up		chr1:171383608-171383549							16939.4	26178.4	14.3406	14.2768	26698.1	13255.4	10864.8	26165.8	27266.1	25103.3	14.5034	14.3785	14.1398	14.2796	14.297	14.2538
A_55_P2004230	0.00826863	0.0609446	2.09198	up	NM_001168470	chr11:72989897-72989838	Emc6	Mus musculus ER membrane protein complex subunit 6 (Emc6), transcript variant 1, mRNA [NM_001168470]	GO:0072546|GO:0008150|GO:0003674|GO:0016020|GO:0005783|GO:0016021	NM_001168470	Mm.73608	66048	1770.61	1547.62	11.198	10.1332	2100.25	1874.1	1337.48	1715.84	1462.97	1464.06	10.9112	11.5482	11.1348	10.3528	9.9659	10.0808
A_52_P64364	0.189259	0.321238	1.25163	up	NM_010546	chr8:23770313-23770254	Ikbkb	Mus musculus inhibitor of kappaB kinase beta (Ikbkb), transcript variant 2, mRNA [NM_010546]	GO:0005515|GO:0035631|GO:0008284|GO:0001782|GO:0008384|GO:0008385|GO:0005634|GO:2001259|GO:0042501|GO:0042803|GO:0031175|GO:0043231|GO:0005829|GO:0005737|GO:0051092|GO:0004702|GO:0000166|GO:0010765|GO:0016301|GO:0045944|GO:0097110|GO:0071356|GO:0016772|GO:0023014|GO:0046982|GO:0019901|GO:0007252|GO:0005524|GO:0016310|GO:0004672|GO:0016020|GO:0004674|GO:0009898|GO:0006468|GO:0016740	NM_010546	Mm.277886	16150	814.99	1196.92	10.0447	9.72094	1220.29	663.357	561.321	883.246	1524.15	1183.36	10.1272	10.1104	9.89669	9.37286	10.0314	9.75853
A_55_P2080794	0.0185142	0.0887668	1.75945	up	NM_001015889	chr13:101425744-101425803	Taf9	Mus musculus TAF9 RNA polymerase II, TATA box binding protein (TBP)-associated factor (Taf9), transcript variant 3, mRNA [NM_001015889]	GO:0044212|GO:0030307|GO:0005634|GO:0032435|GO:0002039|GO:0000125|GO:0071339|GO:0045944|GO:0033613|GO:0004402|GO:0070555|GO:0006352|GO:0006355|GO:0043066|GO:0005669|GO:0046982|GO:0030914|GO:0003713|GO:0060760|GO:0050821|GO:0070761|GO:0003677|GO:0006351|GO:0033276|GO:0043966|GO:0070742	NM_001015889	Mm.301148	108143	2082.46	2122.13	11.4212	10.6061	2388.32	2229.83	1629.23	2147.7	2006.98	2211.7	11.0878	11.7646	11.4113	10.6733	10.4405	10.7045
A_55_P2092475	0.948206	0.965629	1.01498	up	NM_001163615	chr16:89206195-89206254	Krtap20-2	Mus musculus keratin associated protein 20-2 (Krtap20-2), mRNA [NM_001163615]	GO:0008150|GO:0003674|GO:0005575	NM_001163615	Mm.459837	622935	20.5994	38.0491	4.69023	4.66878	36.4331	8.6757	16.6895	30.7917	45.5868	37.7689	5.01999	4.10015	4.95055	4.51845	4.84143	4.64646
A_55_P2086507	0.0147964	0.0793888	3.86612	up	NM_031368	chr3:88172732-88172673	Bglap3	Mus musculus bone gamma-carboxyglutamate protein 3 (Bglap3), mRNA [NM_031368]	GO:0005791|GO:0030500|GO:0005794|GO:0005509|GO:0031988|GO:0005576|GO:0042995|GO:0005615|GO:0031214|GO:0030425|GO:0008150|GO:0005737|GO:0043204|GO:0008147	NM_031368	Mm.482191	12095	94.5742	50.3582	6.94282	4.99193	162.191	68.3192	53.2124	67.9844	28.263	54.8272	7.22511	6.99924	6.60411	5.64883	4.15826	5.16872
A_51_P121818	0.210574	0.344415	1.29621	up	NM_016781	chr15:98643461-98643402	Prkag1	Mus musculus protein kinase, AMP-activated, gamma 1 non-catalytic subunit (Prkag1), mRNA [NM_016781]	GO:0006629|GO:0031588|GO:0004679|GO:0016208|GO:0019901|GO:0005634|GO:0051291|GO:0005524|GO:0010628|GO:0043234|GO:0050790|GO:0004672|GO:0043531|GO:0000166|GO:0030554|GO:0006631|GO:0006468|GO:0006633	NM_016781	Mm.6670	19082	1578.92	2243.04	11.0575	10.6832	1655.92	1557.91	1522.94	2023.23	2416.93	2288.97	10.5665	11.2803	11.3258	10.5821	10.7141	10.7536
A_55_P2088685	0.000254322	0.0233306	8.91019	up	AK134919	chr6:29749493-29749552	Ahcyl2	S-adenosylhomocysteine hydrolase-like 2 [Source:MGI Symbol;Acc:MGI:1921590] [ENSMUST00000150365]	GO:0004013|GO:0016787|GO:0005575|GO:0006730		Mm.488973	74340	346.411	81.576	8.89682	5.74136	460.365	329.781	249.086	57.1729	81.5902	105.965	8.72422	9.17438	8.79185	5.40127	5.68094	6.14186
A_55_P2070681	0.00475159	0.0492881	1.44977	up	NM_172126	chr5:121969463-121969404	Adam1a	Mus musculus a disintegrin and metallopeptidase domain 1a (Adam1a), mRNA [NM_172126]	GO:0005515|GO:0007339|GO:0046872|GO:0016020|GO:0016787|GO:0007342|GO:0006508|GO:0008233|GO:0008270|GO:0045121|GO:0016021|GO:0004222|GO:0008237	NM_172126	Mm.1453	280668	25.355	36.1326	5.13496	4.59913	38.6397	16.3446	21.0809	30.1497	40.1309	38.1172	5.10798	5.02074	5.27617	4.48445	4.65384	4.65911
A_55_P2154252	0.0096543	0.064928	4.03517	up	NM_013529	chr11:49652045-49652104	Gfpt2	Mus musculus glutamine fructose-6-phosphate transaminase 2 (Gfpt2), mRNA [NM_013529]	GO:0016051|GO:0004360|GO:0005975|GO:0008152|GO:0008483|GO:0030246|GO:0016740|GO:0006541	NM_013529	Mm.24402	14584	70.1493	31.6146	6.38804	4.37541	137.898	32.2383	40.3115	33.8815	21.6273	39.3351	6.99488	5.96776	6.20148	4.65277	3.77389	4.69958
A_55_P1999182	0.0574433	0.161294	2.13027	up	NM_001109626	chr11:98112289-98112348	Cdk12	Mus musculus cyclin-dependent kinase 12 (Cdk12), transcript variant 1, mRNA [NM_001109626]	GO:0070816|GO:0006397|GO:0008380|GO:0019908|GO:0030332|GO:0005730|GO:0005634|GO:0005524|GO:0008353|GO:0016310|GO:0046777|GO:0004672|GO:0043405|GO:0016607|GO:0000166|GO:0004674|GO:0016301|GO:0006468|GO:0016740|GO:0016772|GO:0004693	NM_001109626	Mm.260516	69131	328.131	321.63	8.85683	7.76579	299.734	377.633	307.026	378.606	315.898	270.387	8.13673	9.35873	9.07502	8.12479	7.66252	7.51007
A_55_P2025690	0.398875	0.529233	1.23707	up	NM_022025	chr17:54413328-54413269	Slc5a7	Mus musculus solute carrier family 5 (choline transporter), member 7 (Slc5a7), mRNA [NM_022025]	GO:0033265|GO:0005515|GO:0005215|GO:0015220|GO:0005886|GO:0008292|GO:0015871|GO:0007274|GO:0055085|GO:0007271|GO:0034220|GO:0016020|GO:0043025|GO:0006810|GO:0035725|GO:0042136|GO:0016021|GO:0005307|GO:0006814|GO:0006811|GO:0015293	NM_022025	Mm.155241	63993	10.9976	19.4668	3.98968	3.68275	13.466	8.73987	10.7869	16.0307	16.2459	26.1238	3.54683	4.11137	4.31085	3.55991	3.35796	4.13039
A_55_P2097630	0.774999	0.842097	1.18778	up	XM_006544322	chr8:17536569-17536628	LOC102643134	PREDICTED: Mus musculus uncharacterized LOC102643134 (LOC102643134), mRNA [XM_006544322]		XM_006544322		102643134	12.7232	22.9413	4.17406	3.92578	5.23259	14.037	18.8999	16.9766	22.4052	29.4421	2.60631	4.7986	5.11726	3.654	3.8313	4.29206
A_51_P117115	0.567945	0.677986	1.0797	up	NM_146960	chr7:147838658-147838717	Olfr53	Mus musculus olfactory receptor 53 (Olfr53), mRNA [NM_146960]	GO:0050911|GO:0007608|GO:0007165|GO:0004984|GO:0016020|GO:0007186|GO:0005886|GO:0004930|GO:0016021|GO:0004871|GO:0050896	NM_146960	Mm.246542	258962	10.2578	18.1491	3.72076	3.61012	18.1861	5.49804	7.08924	17.169	20.9626	16.3157	3.98326	3.45907	3.71995	3.67041	3.73376	3.4262
A_51_P176797	0.0191361	0.089934	1.70284	up	NM_172397	chr11:106018020-106017961	Limd2	Mus musculus LIM domain containing 2 (Limd2), mRNA [NM_172397]	GO:0008150|GO:0003674|GO:0008270|GO:0005575|GO:0046872	NM_172397	Mm.21687	67803	101.897	118.325	7.08564	6.3177	159.889	55.3942	90.4089	98.4751	132.026	124.474	7.20442	6.70843	7.34408	6.19633	6.3811	6.37568
A_55_P2039444	0.497526	0.617316	1.1541	up	NM_025599	chr16:57302371-57302312	Cmss1	Mus musculus cms small ribosomal subunit 1 (Cmss1), mRNA [NM_025599]	GO:0008150|GO:0005575	NM_025599	Mm.425976	66497	216.668	393.733	8.27763	8.07086	232.302	221.412	196.291	372.68	446.641	361.879	7.7485	8.63365	8.45074	8.10141	8.16463	7.94655
A_51_P374726	0.293062	0.428354	2.34474	up	NM_008987	chr3:66029245-66029304	Ptx3	Mus musculus pentraxin related gene (Ptx3), mRNA [NM_008987]	GO:0050766|GO:0005576|GO:0001872|GO:0001878|GO:0008228|GO:0045429	NM_008987	Mm.276776	19288	51.295	19.9983	4.9704	3.74097	137.615	8.12851	8.14163	16.2162	24.2402	19.5385	6.99169	4.00215	3.91736	3.57939	3.94025	3.70328
A_55_P1967928	0.0157648	0.0818403	1.63888	up	NM_026040	chr18:52650289-52650348	Srfbp1	Mus musculus serum response factor binding protein 1 (Srfbp1), mRNA [NM_026040]	GO:0005515|GO:0008150|GO:0006355|GO:0005737|GO:0005634|GO:0006351	NM_026040	Mm.100617	67222	379.033	461.398	9.02462	8.31191	483.529	381.595	271.975	432.899	497.487	453.809	8.79011	9.37052	8.91324	8.31777	8.32875	8.28921
A_55_P2048249	0.289734	0.425342	1.33534	up		chr3:037498264-037498205							4931.88	6360.79	12.659	12.2418	4548.84	5189.87	5056.93	5731.05	7295.02	6056.3	11.9923	12.9808	13.0039	12.1242	12.3867	12.2145
A_55_P2134967	0.586049	0.692584	1.0217	up	NM_009484	chrY:511231-511172	Uty	Mus musculus ubiquitously transcribed tetratricopeptide repeat gene, Y chromosome (Uty), mRNA [NM_009484]	GO:0005515|GO:0010468|GO:0051213|GO:0005634|GO:0000978|GO:0001701|GO:0051864|GO:0046872|GO:0045184|GO:0007507|GO:0070544|GO:0043234|GO:0003007|GO:0048568|GO:0016491|GO:0031935|GO:0086003|GO:0060070|GO:0055114|GO:0016568	NM_009484	Mm.20477	22290	30.9494	63.1945	5.44074	5.40977	45.8854	23.7072	23.2555	56.7452	69.0628	63.7756	5.36638	5.53637	5.41946	5.38997	5.43888	5.40046
A_52_P262219	0.186438	0.318336	2.72503	up	NM_010234	chr12:86817900-86817959	Fos	Mus musculus FBJ osteosarcoma oncogene (Fos), mRNA [NM_010234]	GO:0005515|GO:0043005|GO:0003700|GO:0006366|GO:0044212|GO:0005783|GO:0005634|GO:0035914|GO:0060395|GO:0005737|GO:0003690|GO:0031668|GO:0045944|GO:0071277|GO:0007179|GO:0005667|GO:0006355|GO:0046982|GO:0042493|GO:0045672|GO:0070412|GO:0003677|GO:0000979|GO:0007399|GO:0043565|GO:0016020|GO:0034614|GO:0045893|GO:0008134	NM_010234	Mm.246513	14281	9893.35	3403.5	12.7239	11.2776	24648.7	3375.34	1656.02	3056.81	2806.6	4347.1	14.4007	12.3405	11.4305	11.182	10.9368	11.714
A_55_P2000909	0.0581364	0.162425	1.13387	up	NM_013795	chr9:44721433-44721374	Atp5l	Mus musculus ATP synthase, H+ transporting, mitochondrial F0 complex, subunit G (Atp5l), mRNA [NM_013795]	GO:0005739|GO:0046034|GO:0015986|GO:0008553|GO:0006200|GO:0005743|GO:0000276|GO:0016887|GO:0005753	NM_013795	Mm.14663	27425	22347.5	34002.7	14.8266	14.6454	31010.9	18506.9	17524.8	33549.8	36498.4	31960	14.7097	14.9028	14.8674	14.6119	14.7154	14.6088
A_51_P296416	0.124966	0.250012	1.76794	up	NM_019716	chr8:87831769-87831828	Orc6	Mus musculus origin recognition complex, subunit 6 (Orc6), transcript variant 1, mRNA [NM_019716]	GO:0006260|GO:0006261|GO:0003674|GO:0000808|GO:0005634|GO:0005664|GO:0003677	NM_019716	Mm.29709	56452	807.506	851.656	10.0571	9.23506	690.167	1078.78	653.567	774.727	926.796	853.444	9.30016	10.7645	10.1067	9.17484	9.28362	9.24673
A_55_P2263053	0.584403	0.691413	1.11496	up	CK128530	chr10:92981534-92981593	Hal	histidine ammonia lyase [Source:MGI Symbol;Acc:MGI:96010] [ENSMUST00000129421]	GO:0005737|GO:0009058|GO:0006547|GO:0006548|GO:0004397|GO:0003824|GO:0016829|GO:0016841		Mm.205258	15109	58.4823	102.564	6.22828	6.07128	103.621	31.6803	40.1456	71.0729	132.726	103.892	6.5497	5.94123	6.1939	5.71216	6.38976	6.11192
A_66_P133043	0.0330387	0.119169	1.32311	up	NM_010773	chr18:70785350-70785409	Mbd2	Mus musculus methyl-CpG binding domain protein 2 (Mbd2), mRNA [NM_010773]	GO:0000792|GO:0000790|GO:0008327|GO:0030177|GO:0005634|GO:0003729|GO:0043623|GO:0005737|GO:0042127|GO:0000785|GO:0042711|GO:0006355|GO:0043044|GO:0019904|GO:0005730|GO:0031492|GO:0000122|GO:0000978|GO:0003677|GO:0006351|GO:0043234|GO:0000118|GO:0035197|GO:0003682|GO:0070742|GO:0000980	NM_010773	Mm.322	17191	5410.86	6955.26	12.7662	12.3622	6974.66	4898.56	4359.35	5992.2	7965.91	6907.68	12.61	12.8915	12.797	12.1834	12.5101	12.3932
A_55_P2150294	0.0850314	0.201988	1.33113	up	NM_001254744	chr10:21834057-21833998	E030030I06Rik	Mus musculus RIKEN cDNA E030030I06 gene (E030030I06Rik), transcript variant 1, mRNA [NM_001254744]	GO:0008150|GO:0003674|GO:0005575	NM_001254744	Mm.177746	319887	1198.56	1668.13	10.6499	10.2372	1483.32	1000.78	1111.56	1383.16	2020.02	1601.19	10.4034	10.6653	10.8809	10.0463	10.4508	10.2145
A_52_P291420	0.276804	0.412446	1.92758	up	NM_172476	chr7:125690907-125690848	Tmc7	Mus musculus transmembrane channel-like gene family 7 (Tmc7), mRNA [NM_172476]	GO:0008150|GO:0003674|GO:0016020|GO:0006810|GO:0016021|GO:0005575|GO:0006811	NM_172476	Mm.69380	209760	12.9767	16.5164	4.21271	3.26592	11.5843	9.78299	17.5627	5	31.2263	13.3229	3.3367	4.27917	5.02227	2.32438	4.30299	3.17038
A_55_P2295515	0.0876054	0.205039	1.5052	up	AK018020	chr14:47937086-47937145	5830458C19Rik	Mus musculus adult male thymus cDNA, RIKEN full-length enriched library, clone:5830458C19 product:unclassifiable, full insert sequence. [AK018020]			Mm.446655	76081	29.6582	42.1245	5.35765	4.76769	45.4269	23.5142	20.0335	26.1402	50.9473	49.2861	5.35242	5.52451	5.19602	4.27893	5.00915	5.01501
A_51_P125050	0.092993	0.211702	1.6083	up	NM_134139	chr19:8812462-8812679	Wdr74	Mus musculus WD repeat domain 74 (Wdr74), mRNA [NM_134139]	GO:0003674|GO:0016070|GO:0005730|GO:0001825|GO:0005634	NM_134139	Mm.29627	107071	362.996	458.956	8.99175	8.30621	368.008	412.49	308.489	456.431	493.262	427.175	8.42144	9.47199	9.08181	8.40042	8.3184	8.19981
A_51_P189208	0.952061	0.968429	1.00989	up	NR_033592	chr3:55651541-55651600	4933417G07Rik	Mus musculus RIKEN cDNA 4933417G07 gene (4933417G07Rik), non-coding RNA [NR_033592]		NR_033592	Mm.195603	71182	1231.84	2237.11	10.69	10.6758	1404.58	1307.53	983.397	1994.76	2621.68	2094.88	10.3205	11.0317	10.7177	10.5677	10.8391	10.6205
A_52_P379337	0.181071	0.312145	1.17355	up	NM_194054	chr11:29641510-29641717	Rtn4	Mus musculus reticulon 4 (Rtn4), transcript variant 1, mRNA [NM_194054]	GO:0005515|GO:0043005|GO:0030308|GO:0005886|GO:0005783|GO:0021801|GO:0030176|GO:0005635|GO:0042995|GO:0032403|GO:0048679|GO:0060317|GO:0005737|GO:0007413|GO:0070571|GO:0030517|GO:0043209|GO:0043025|GO:2000172|GO:0030334|GO:0071786|GO:0001525|GO:0045687|GO:0051960|GO:0007399|GO:0043234|GO:0016020|GO:0045665|GO:0010977|GO:0050771|GO:0016021|GO:0051930|GO:0033603	NM_194054	Mm.192580	68585	266.91	460.132	8.53845	8.30757	365.05	193.359	242.321	479.675	439.949	460.772	8.40952	8.45452	8.7513	8.46873	8.14243	8.31156
A_55_P2046838	0.0105411	0.0675852	1.34533	up	NM_011787	chr8:96495552-96495493	Amfr	Mus musculus autocrine motility factor receptor (Amfr), mRNA [NM_011787]	GO:0005515|GO:0006511|GO:0004842|GO:0048471|GO:0005783|GO:0016874|GO:0005634|GO:0030176|GO:0051259|GO:0030425|GO:0046872|GO:0030426|GO:0030968|GO:0005737|GO:0000166|GO:0043025|GO:0004872|GO:0000209|GO:0009987|GO:0030433|GO:0043234|GO:0016020|GO:0005887|GO:0008270|GO:0016021	NM_011787	Mm.34641	23802	582.158	820.528	9.60872	9.18076	780.715	521.742	444.017	782.604	845.921	833.06	9.4697	9.77987	9.57657	9.19384	9.13218	9.21626
A_55_P2021923	0.109409	0.231398	1.12337	up	XR_374403	chr2:151369677-151369736	Fkbp1a	FK506 binding protein 1a [Source:MGI Symbol;Acc:MGI:95541] [ENSMUST00000144171]	GO:0005515|GO:0000413|GO:0030424|GO:0030018|GO:0055010|GO:0019221|GO:0046332|GO:0043231|GO:0032092|GO:0005829|GO:0032880|GO:0005622|GO:0005737|GO:0006936|GO:0031000|GO:0042098|GO:0048185|GO:0006457|GO:0060314|GO:0008144|GO:0031398|GO:0043679|GO:0043206|GO:0004871|GO:0043123|GO:0051209|GO:0005623|GO:0003755|GO:0033017|GO:0005528|GO:0032925|GO:0005160|GO:0044325|GO:0060347|GO:0031012|GO:0007183|GO:…	XR_374403	Mm.278458	14225	475.939	814.534	9.33873	9.17089	644.456	387.276	396.084	730.695	902.031	810.876	9.20104	9.38749	9.42765	9.09376	9.24077	9.17813
A_51_P391825	0.83713	0.887788	1.03806	up	NM_016699	chr4:147954469-147954528	Exosc10	Mus musculus exosome component 10 (Exosc10), mRNA [NM_016699]	GO:0000460|GO:0008408|GO:0003723|GO:0006364|GO:0071035|GO:0004532|GO:0005634|GO:0009048|GO:0071034|GO:0003824|GO:0000178|GO:0005622|GO:0004527|GO:0005737|GO:0000184|GO:0000166|GO:0044237|GO:0006396|GO:0071028|GO:0000956|GO:0005730|GO:0035327|GO:0003676|GO:0004518|GO:0006139|GO:0016787|GO:0071044|GO:0000176|GO:0071048	NM_016699	Mm.266635	50912	280.539	543.409	8.61153	8.55764	339.434	306.556	195.627	536.327	598.354	495.545	8.312	9.07705	8.44554	8.63395	8.61806	8.42092
A_55_P2078173	0.0457737	0.141818	1.66923	up									3521.1	3668.97	12.1569	11.4177	3705.37	3962.38	2895.54	3551.59	3844.5	3610.81	11.6916	12.583	12.196	11.4073	11.4153	11.4305
A_51_P195506	0.51173	0.63033	1.17737	up	NM_007778	chr3:107544392-107544333	Csf1	Mus musculus colony stimulating factor 1 (macrophage) (Csf1), transcript variant 1, mRNA [NM_007778]	GO:0005515|GO:0048471|GO:0008284|GO:0005886|GO:0008283|GO:0005157|GO:0046579|GO:0005615|GO:0042803|GO:0048873|GO:0006954|GO:0030278|GO:0045657|GO:0045860|GO:0042476|GO:0030225|GO:0040018|GO:0002158|GO:0030335|GO:0010744|GO:0030316|GO:0045672|GO:0060763|GO:0005576|GO:0045651|GO:0005125|GO:0043235|GO:0010628|GO:0003006|GO:0032270|GO:0032946|GO:0001503|GO:0016020|GO:0045087|GO:0016021|GO:0060611|GO:…	NM_007778	Mm.795	12977	228.534	402.958	8.3468	8.11123	237.421	252.933	195.249	439.017	375.319	394.539	7.78043	8.81701	8.44296	8.33974	7.91308	8.08086
A_55_P2084611	0.0375919	0.127665	2.11529	up	NM_019737	chr18:20844563-20844504	B4galt6	Mus musculus UDP-Gal:betaGlcNAc beta 1,4-galactosyltransferase, polypeptide 6 (B4galt6), mRNA [NM_019737]	GO:0005794|GO:0016020|GO:0016757|GO:0005975|GO:0030148|GO:0008489|GO:0016021|GO:0005575|GO:0008378|GO:0046872|GO:0016740	NM_019737	Mm.393827	56386	1073.31	991.576	10.4705	9.38962	1465.98	884.881	869.056	557.385	1194.53	1222.82	10.3835	10.4975	10.5304	8.69416	9.66547	9.80922
A_52_P421713	0.0536115	0.15516	6.96146	up	NM_001004155	chr14:70554747-70554688	9930012K11Rik	Mus musculus RIKEN cDNA 9930012K11 gene (9930012K11Rik), transcript variant 1, mRNA [NM_001004155]	GO:0008150|GO:0003674	NM_001004155	Mm.12148	268759	138.494	35.9507	7.29335	4.49396	51.337	264.446	99.6984	18.9127	49.5915	39.3478	5.52565	8.87801	7.4764	3.80975	4.97213	4.70002
A_52_P550049	0.760684	0.831159	1.10858	up	NM_001110832	chr17:48526745-48526686	Nfya	Mus musculus nuclear transcription factor-Y alpha (Nfya), transcript variant 1, mRNA [NM_001110832]	GO:0005515|GO:0006355|GO:0003700|GO:0044212|GO:2000648|GO:0005634|GO:0003677|GO:0006351|GO:2000036|GO:0001221|GO:0016602|GO:0045944|GO:0045893|GO:0008134	NM_001110832	Mm.4929	18044	137.869	250.1	7.56637	7.41765	134.561	192.097	86.9487	237.176	282.517	230.606	6.96178	8.44735	7.28999	7.46582	7.50812	7.27903
A_55_P2250514	0.239063	0.374707	3.04299	up	AK016828	chr15:84410013-84409954	4933416A02Rik	Mus musculus adult male testis cDNA, RIKEN full-length enriched library, clone:4933416A02 product:unclassifiable, full insert sequence. [AK016828]			Mm.292334	74461	33.0581	19.858	5.24388	3.63838	9.51922	59.7029	29.9522	9.18402	30.7114	19.6786	3.14051	6.81668	5.77444	2.92758	4.27424	3.71333
A_55_P2009477	0.141883	0.269517	1.18111	up	NM_153117	chr11:52222103-52222162	9530068E07Rik	Mus musculus RIKEN cDNA 9530068E07 gene (9530068E07Rik), mRNA [NM_153117]	GO:0008150|GO:0003674|GO:0016020|GO:0016021|GO:0005575	NM_153117	Mm.291979	213673	4103.41	5893.46	12.3679	12.1277	5169.55	3744.7	3395.98	6209.81	5478.68	5991.88	12.1799	12.4942	12.4296	12.2387	11.9494	12.1951
A_55_P2043382	0.873688	0.914631	1.0353	up	NM_001252532	chr11:115716998-115717057	Llgl2	Mus musculus lethal giant larvae homolog 2 (Drosophila) (Llgl2), transcript variant 2, mRNA [NM_001252532]	GO:0007049|GO:0005737|GO:0032878|GO:0030165|GO:0006887|GO:0051301	NM_001252532	Mm.290450	217325	4231.85	6468.27	12.3087	12.2587	6611.03	2243.63	3840.9	7433.49	6451.45	5519.86	12.5388	11.7751	12.6122	12.4969	12.2049	12.0741
A_55_P2001714	0.657926	0.75056	1.12023	up	NM_026678	chr2:126912587-126912646	Blvra	Mus musculus biliverdin reductase A (Blvra), mRNA [NM_026678]	GO:0005737|GO:0000166|GO:0004074|GO:0016491|GO:0008270|GO:0042167|GO:0046872|GO:0070062|GO:0055114	NM_026678	Mm.22028	109778	124.722	241.056	7.49726	7.33346	128.941	129.977	115.247	184.037	302.597	236.534	6.89465	7.90824	7.6889	7.07743	7.60102	7.32194
A_55_P1997696	0.597192	0.701628	1.14908	up	NM_025806	chr6:136560678-136560619	Plbd1	Mus musculus phospholipase B domain containing 1 (Plbd1), mRNA [NM_025806]	GO:0016042|GO:0006629|GO:0008150|GO:0003674|GO:0016787|GO:0005575|GO:0005764	NM_025806	Mm.3311	66857	9851.13	15154.6	13.6628	13.4623	10022.8	9812.88	9717.73	11702.9	20028	13733.1	13.1084	13.9124	13.9675	13.1331	13.8602	13.3936
A_55_P2184449	0.12588	0.251076	2.04477	up	AK134871	chr11:79545184-79545243	Gm10387	Mus musculus adult male olfactory brain cDNA, RIKEN full-length enriched library, clone:6430500J09 product:hypothetical protein, full insert sequence. [AK134871]	GO:0008150|GO:0003674|GO:0005575		Mm.420541	100038730	32.2179	33.7047	5.53665	4.50471	25.8119	32.2184	38.6235	32.6615	30.019	38.4336	4.50465	5.96598	6.13931	4.59998	4.245	4.66915
A_51_P163079	0.355201	0.488978	1.1481	up	NM_133735	chr5:145908965-145908906	Ptcd1	Mus musculus pentatricopeptide repeat domain 1 (Ptcd1), mRNA [NM_133735]	GO:0005739|GO:0008150|GO:0003674|GO:0005759|GO:0008033	NM_133735	Mm.474456	71799	189.129	341.931	8.07095	7.8717	232.14	147.395	187.851	323.287	378.837	323.668	7.74705	8.07615	8.38963	7.90368	7.92743	7.78398
A_52_P488361	0.134847	0.261766	2.61879	up	NM_028839	chr14:31685861-31687598	Tmem110	Mus musculus transmembrane protein 110 (Tmem110), mRNA [NM_028839]	GO:0008150|GO:0003674|GO:0016020|GO:0016021|GO:0005575	NM_028839	Mm.143025	69179	24.3001	18.9872	5.0612	3.67231	14.2651	31.9777	26.6575	19.5375	21.5058	15.9183	3.61734	5.95584	5.61043	3.85827	3.76851	3.39014
A_51_P447668	0.18581	0.317598	1.29842	up	NM_011203	chr5:20494855-20493284	Ptpn12	Mus musculus protein tyrosine phosphatase, non-receptor type 12 (Ptpn12), mRNA [NM_011203]	GO:0005515|GO:0017124|GO:0030054|GO:0005886|GO:0002102|GO:0042995|GO:0035335|GO:0005829|GO:0016791|GO:0005737|GO:0006470|GO:0016787|GO:0016311|GO:0004721|GO:0004725	NM_011203	Mm.319117	19248	918.85	1222.34	10.1433	9.7665	1534.87	699.466	522.213	961.485	1469.42	1236.12	10.4521	10.184	9.79368	9.50299	9.97282	9.82367
A_55_P2024953	0.815397	0.8714	1.1088	up	NM_001081278	chr14:101841636-101841577	Tbc1d4	Mus musculus TBC1 domain family, member 4 (Tbc1d4), mRNA [NM_001081278]	GO:0005515|GO:0032869|GO:0032313|GO:0005737|GO:0031988|GO:0016192|GO:0031339|GO:0005097|GO:0005096	NM_001081278	Mm.320639	210789	274.842	491.108	8.53409	8.3851	190.371	393.173	240.983	378.845	496.762	597.717	7.45367	9.4071	8.7415	8.12626	8.32749	8.70154
A_55_P2125322	0.408866	0.538053	1.16355	up		chr17:008577185-008577126							11682.7	17161.1	13.908	13.6895	12642.1	11437.1	10969	17391.2	17168.1	16924	13.4357	14.1385	14.1499	13.7285	13.6575	13.6824
A_55_P2126627	0.101338	0.222395	1.10239	up	NM_001081409	chr15:66426480-66426539	Phf20l1	Mus musculus PHD finger protein 20-like 1 (Phf20l1), mRNA [NM_001081409]	GO:0008150|GO:0003674|GO:0008270|GO:0005575|GO:0046872	NM_001081409	Mm.267473	239510	41.3335	77.1779	5.83632	5.69568	63.5451	28.1707	32.2845	69.5534	88.816	73.1642	5.8449	5.78259	5.88148	5.68141	5.80553	5.60011
A_51_P507622	0.00302846	0.0418295	2.82326	up	NM_181593	chr7:27992475-27992416	Itpkc	Mus musculus inositol 1,4,5-trisphosphate 3-kinase C (Itpkc), mRNA [NM_181593]	GO:0005515|GO:0016310|GO:0005516|GO:0008440|GO:0005737|GO:0000166|GO:0016301|GO:0005634|GO:0005575|GO:0005524|GO:0016740	NM_181593	Mm.30963	233011	1210.26	767.505	10.5794	9.08204	1720.19	1230.2	680.383	758.008	766.393	778.115	10.6186	10.9529	10.1667	9.14824	8.98355	9.11434
A_55_P2038252	0.00188573	0.0358282	1.52908	up	NM_001290800	chr2:119642510-119642569	Tyro3	Mus musculus TYRO3 protein tyrosine kinase 3 (Tyro3), transcript variant 2, mRNA [NM_001290800]	GO:0005886|GO:0034122|GO:0060068|GO:0042698|GO:0005634|GO:0005635|GO:0007283|GO:0005622|GO:0043524|GO:0046777|GO:0000166|GO:0016301|GO:0034446|GO:0001779|GO:0007155|GO:0045824|GO:0016772|GO:0046982|GO:0005623|GO:0043277|GO:0030168|GO:0018108|GO:0005524|GO:0070527|GO:0016310|GO:0004672|GO:0016020|GO:0050728|GO:0043491|GO:0005789|GO:0051250|GO:0006468|GO:0004713|GO:0016021|GO:0021885|GO:0070050|GO:…	NM_001290800	Mm.2901	22174	24.1859	32.8512	5.07524	4.46258	36.4555	16.5696	19.5326	29.1192	38.7391	30.6953	5.02074	5.04459	5.16037	4.43091	4.60039	4.35642
A_55_P1960202	0.241472	0.377327	1.27698	up	NM_001081249	chr13:89795139-89795080	Vcan	Mus musculus versican (Vcan), transcript variant 1, mRNA [NM_001081249]	GO:0008347|GO:0005509|GO:0005578|GO:0005576|GO:0005615|GO:0001649|GO:0043231|GO:0007507|GO:0031012|GO:0005540|GO:0016020|GO:0030246|GO:0007155	NM_001081249	Mm.158700	13003	78.2563	125.102	6.73306	6.38032	123.639	52.6427	58.4871	153.176	128.704	93.4253	6.82199	6.63892	6.73827	6.83129	6.34682	5.96286
A_66_P131433	0.428481	0.556559	1.1101	up		chr3:124468644-124468703		Q7M6U4_MOUSE (Q7M6U4) Gag protein, complete [TC1600187]					11.6399	21.8336	4.03697	3.88628	16.4584	9.92136	8.53992	18.2643	22.1158	25.1208	3.82445	4.30261	3.98386	3.76494	3.81421	4.07969
A_55_P1953093	0.17654	0.307571	1.54068	up	NM_148917	chr4:122975265-122975324	Pabpc4	Mus musculus poly(A) binding protein, cytoplasmic 4 (Pabpc4), transcript variant 2, mRNA [NM_148917]	GO:0008266|GO:0008150|GO:0005737|GO:0010494|GO:0030529|GO:0003723|GO:0008143|GO:0017130|GO:0005634	NM_148917	Mm.277091	230721	1094.27	1331.65	10.5314	9.90781	983.22	1194.06	1105.53	1489.37	1246.24	1259.35	9.81465	10.9089	10.8705	10.1521	9.72408	9.84723
A_55_P2078544	0.0400087	0.131739	1.58063	up	NM_025445	chr15:83140758-83140699	Arfgap3	Mus musculus ADP-ribosylation factor GTPase activating protein 3 (Arfgap3), mRNA [NM_025445]	GO:0005794|GO:0015031|GO:0046872|GO:0005829|GO:0043547|GO:0008060|GO:0005737|GO:0016020|GO:0032312|GO:0006810|GO:0008270|GO:0016192|GO:0005096	NM_025445	Mm.258910	66251	331.754	420.912	8.80925	8.14875	480.152	218.26	296.85	323.898	558.224	380.614	8.78134	8.61826	9.02815	7.90746	8.51297	8.02582
A_55_P2213968	0.263846	0.39981	1.35327	up	NR_045840	chr8:28260098-28260157	4933416M07Rik	Mus musculus RIKEN cDNA 4933416M07 gene (4933416M07Rik), long non-coding RNA [NR_045840]	GO:0008150|GO:0003674|GO:0005575	NR_045840	Mm.395259	71082	15.4351	24.7735	4.4995	4.06304	17.1259	13.7728	15.4065	23.1016	22.0522	29.1668	3.88667	4.77573	4.83608	4.0981	3.81033	4.28069
A_51_P254299	0.375645	0.507911	1.234	up	NM_001286028	chr17:46440042-46440101	Dlk2	Mus musculus delta-like 2 homolog (Drosophila) (Dlk2), transcript variant 2, mRNA [NM_001286028]	GO:0045746|GO:0046982|GO:0016020|GO:0045598|GO:0005509|GO:0016021|GO:0005575|GO:0042803	NM_001286028	Mm.23633	106565	323.83	538.316	8.84689	8.54355	322.229	330.91	318.35	503.96	568.599	542.388	8.23864	9.17845	9.12357	8.53978	8.53733	8.55353
A_55_P2040485	0.0350945	0.123054	1.51879	up	XM_006543453	chr19:11467221-11467280	Ms4a4a	PREDICTED: Mus musculus membrane-spanning 4-domains, subfamily A, member 4A (Ms4a4a), mRNA [XM_006543453]	GO:0008150|GO:0003674|GO:0005575	XM_006543453	Mm.391204	666907	295.476	370.32	8.5742	7.97127	496.637	177.576	212.214	282.986	442.592	385.382	8.82447	8.33454	8.56358	7.71741	8.15015	8.04626
A_55_P2028570	0.259094	0.394955	1.67013	up	NM_018822	chr11:119204924-119204865	Sgsh	Mus musculus N-sulfoglucosamine sulfohydrolase (sulfamidase) (Sgsh), mRNA [NM_018822]	GO:0005515|GO:0016787|GO:0016250|GO:0008484|GO:0005764|GO:0030201	NM_018822	Mm.103788	27029	5166.9	5537.44	12.7007	11.9607	4101.93	4655.44	6743.32	3656.69	5300.03	7655.61	11.8423	12.8137	13.446	11.45	11.8952	12.537
A_51_P464630	0.156937	0.286797	1.22797	up	NM_011233	chr13:101387435-101387376	Rad17	Mus musculus RAD17 homolog (S. pombe) (Rad17), transcript variant 1, mRNA [NM_011233]	GO:0000781|GO:0007093|GO:0017111|GO:0005634|GO:0007275|GO:0005524|GO:0006974|GO:0042325|GO:0007049|GO:0006281|GO:0000166|GO:0000077|GO:0008156	NM_011233	Mm.248489	19356	822.41	1200.42	10.0558	9.75955	1173.76	786.184	507.287	1142.58	1302.42	1156.25	10.0671	10.343	9.7574	9.76408	9.79181	9.72275
A_55_P2084741	0.00750047	0.0589199	1.90279	up	NM_026107	chr11:65642681-65642740	Zkscan6	Mus musculus zinc finger with KRAB and SCAN domains 6 (Zkscan6), mRNA [NM_026107]	GO:0005622|GO:0006355|GO:0003700|GO:0006366|GO:0006357|GO:0000981|GO:0005634|GO:0003676|GO:0003677|GO:0046872|GO:0006351	NM_026107	Mm.340052	52712	552.85	550.429	9.50374	8.57562	773.794	546.328	338.426	505.082	591.973	554.233	9.45447	9.84562	9.21112	8.54168	8.60332	8.58185
A_55_P2069856	0.288317	0.423926	1.22216	up	NM_177296	chr6:29490942-29490883	Tnpo3	Mus musculus transportin 3 (Tnpo3), mRNA [NM_177296]	GO:0003674|GO:0035048|GO:0005737|GO:0006810|GO:0005634|GO:0015031|GO:0043231	NM_177296	Mm.276381	320938	1526.28	2254.24	10.9807	10.6912	1760	1712.07	1106.78	2319	2211.21	2232.52	10.6491	11.4193	10.8736	10.78	10.5755	10.7182
A_55_P1967633	0.978452	0.985979	1.00842	up	NM_025520	chr6:56651155-56651096	Lsm5	Mus musculus LSM5 homolog, U6 small nuclear RNA associated (S. cerevisiae) (Lsm5), mRNA [NM_025520]	GO:0008380|GO:0006397|GO:0005515|GO:0005737|GO:0046982|GO:0030529|GO:0003723|GO:0005681|GO:0005634|GO:0006402	NM_025520	Mm.25642	66373	763.287	1386.8	9.98937	9.97728	649.704	982.454	657.704	1418.52	1357.95	1383.92	9.21457	10.6371	10.1164	10.0806	9.85372	9.9975
A_55_P2143616	0.735355	0.811894	1.08502	up	AK038623	chr1:74971961-74971902	Ccdc108	coiled-coil domain containing 108 [Source:MGI Symbol;Acc:MGI:2444274] [ENSMUST00000130489]	GO:0008150|GO:0016020|GO:0016021|GO:0005575		Mm.186404	241116	16.573	33.1674	4.59298	4.47526	18.7332	17.5211	13.4649	28.9226	39.1551	31.4245	4.02498	5.1217	4.63227	4.42152	4.61365	4.39062
A_55_P2006519	0.024277	0.101306	2.22702	up	NM_019765	chr5:124029337-124029278	Clip1	Mus musculus CAP-GLY domain containing linker protein 1 (Clip1), transcript variant 1, mRNA [NM_019765]	GO:0005515|GO:0008017|GO:0005881|GO:0031116|GO:0005813|GO:0001578|GO:0005874|GO:0035371|GO:0042995|GO:0031410|GO:0003676|GO:0046872|GO:0044354|GO:0005737|GO:0051010|GO:0016020|GO:0015631|GO:0015630|GO:0006810|GO:0008270|GO:0005856	NM_019765	Mm.241109	56430	244.941	228.694	8.44558	7.29047	251.943	273.409	209.471	246.418	230.048	209.617	7.87509	8.91935	8.54231	7.52422	7.2053	7.14188
A_55_P2034998	0.407696	0.536916	1.10546	up	NM_009386	chr7:72441185-72441126	Tjp1	Mus musculus tight junction protein 1 (Tjp1), transcript variant 1, mRNA [NM_009386]	GO:0005515|GO:0005516|GO:0030054|GO:0009986|GO:0005886|GO:0007605|GO:0019904|GO:0001825|GO:0045177|GO:0005634|GO:0008022|GO:0016327|GO:0043296|GO:0016323|GO:0046581|GO:0016324|GO:0005737|GO:0005913|GO:0016020|GO:0014704|GO:0005912|GO:0005911|GO:0005921|GO:0005923	NM_009386	Mm.4342	21872	2010.64	3252.97	11.3708	11.2262	2594.1	1836.32	1601.5	2650.85	3771.29	3336.77	11.2013	11.5229	11.3881	10.978	11.3853	11.3151
A_55_P2124110	0.00637262	0.0553584	9.62501	up	AK004107	chr17:87682699-87682758	Ttc7	Mus musculus 18-day embryo whole body cDNA, RIKEN full-length enriched library, clone:1110035E02 product:hypothetical protein, full insert sequence. [AK004107]	GO:0030097|GO:0006879		Mm.442659	225049	147.414	31.5592	7.66251	4.39572	95.9655	145.672	200.604	25.1492	36.914	32.6144	6.4514	8.05784	8.47828	4.21896	4.5244	4.44379
A_55_P2054619	0.973584	0.982515	1.00297	up		chr16:011185368-011185309							7958.62	13389.2	13.326	13.3217	10011.1	6913.27	6951.51	14018.3	13566.3	12582.9	13.1056	13.39	13.4823	13.4068	13.2934	13.2648
A_65_P04472	0.507318	0.62639	1.13628	up	NM_025494	chr15:38621773-38621832	Atp6v1c1	Mus musculus ATPase, H+ transporting, lysosomal V1 subunit C1 (Atp6v1c1), mRNA [NM_025494]	GO:0005886|GO:0006200|GO:0015078|GO:0033180|GO:0045177|GO:0031410|GO:0005765|GO:0005737|GO:0008553|GO:0006810|GO:0015991|GO:0070062|GO:0006811|GO:0015992	NM_025494	Mm.276618	66335	836.749	1252.41	9.98637	9.80205	1470.17	497.345	542.729	964.764	1468.24	1324.22	10.3906	9.71869	9.84984	9.5069	9.97212	9.92713
A_52_P331125	0.499243	0.618819	1.1497	up		chrX:045078999-045079058							104.196	169.769	7.04617	6.84491	184.636	75.5935	52.3594	171.61	192.896	144.8	7.40552	7.14999	6.58298	6.98391	6.9455	6.60533
A_55_P2071191	0.126037	0.251242	1.78422	up	NM_133351	chr7:135069907-135069848	Prss8	Mus musculus protease, serine 8 (prostasin) (Prss8), mRNA [NM_133351]	GO:0004252|GO:0005886|GO:0005576|GO:0003824|GO:0005615|GO:0016020|GO:0016787|GO:0010765|GO:0006508|GO:0008236|GO:0045121|GO:0008233|GO:0016021|GO:0046658|GO:0001942|GO:0070633|GO:0019897|GO:0070062|GO:0017080	NM_133351	Mm.5875	76560	235.809	247.54	8.22904	7.39375	358.693	96.7249	252.008	296.061	220.645	225.914	8.38406	7.4965	8.80655	7.78234	7.14954	7.24936
A_55_P2117614	0.646359	0.740428	1.98989	up	NM_028075	chr15:82052262-82052203	Tnfrsf13c	Mus musculus tumor necrosis factor receptor superfamily, member 13c (Tnfrsf13c), mRNA [NM_028075]	GO:0001782|GO:0016020|GO:0030890|GO:0045078|GO:0031296|GO:0050776|GO:0042102|GO:0031295|GO:0002636|GO:0016021|GO:0009897|GO:0002376	NM_028075	Mm.240047	72049	239.33	357.422	7.73513	6.74245	30.3987	368.359	319.234	54.0644	71.2632	946.938	4.75165	9.32693	9.12682	5.32386	5.48831	9.41517
A_52_P56634	0.118037	0.241465	1.59956	up	NM_022012	chr19:5702495-5702554	Map3k11	Mus musculus mitogen-activated protein kinase kinase kinase 11 (Map3k11), mRNA [NM_022012]	GO:0005515|GO:0008219|GO:0008283|GO:0046330|GO:0042803|GO:0042802|GO:0004706|GO:0000187|GO:0005737|GO:0046777|GO:0043525|GO:0000166|GO:0016301|GO:0043507|GO:0005856|GO:0000080|GO:0007017|GO:0004709|GO:0016772|GO:0005813|GO:0043065|GO:0005874|GO:0007254|GO:0031434|GO:0031435|GO:0007256|GO:0007257|GO:0005524|GO:0048365|GO:0016310|GO:0004672|GO:0004674|GO:0006468|GO:0004713|GO:0016740	NM_022012	Mm.185026	26403	663.133	803.556	9.8267	9.14903	626.308	648.099	714.993	820.721	817.997	771.949	9.16112	10.0776	10.2413	9.26695	9.08322	9.09692
A_55_P1964009	0.636167	0.73216	1.09963	up	NM_001033299	chr2:169935647-169935588	Zfp217	Mus musculus zinc finger protein 217 (Zfp217), transcript variant 1, mRNA [NM_001033299]	GO:0006355|GO:0000118|GO:0044212|GO:0007569|GO:0005654|GO:0045892	NM_001033299	Mm.22858	228913	16.8758	33.2563	4.62772	4.49069	19.7379	15.0965	15.793	32.3886	36.0062	31.374	4.10464	4.9065	4.872	4.58913	4.49448	4.38847
A_52_P316405	0.992131	0.995135	1.00144	up	NM_001081108	chr5:138700431-138700490	Lamtor4	Mus musculus late endosomal/lysosomal adaptor, MAPK and MTOR activator 4 (Lamtor4), mRNA [NM_001081108]	GO:0005085|GO:0008361|GO:0071986|GO:0032947|GO:0032008|GO:0071230|GO:0005764|GO:0043087|GO:0043231	NM_001081108	Mm.206901	66096	1493.78	2731.05	10.9771	10.975	1674.48	1411.19	1395.67	2641.02	2889.38	2662.74	10.5834	11.1426	11.2051	10.9709	10.9804	10.9736
A_51_P316553	0.626518	0.724941	1.09891	up	NM_010612	chr5:76329368-76329309	Kdr	Mus musculus kinase insert domain protein receptor (Kdr), mRNA [NM_010612]	GO:0005515|GO:0035584|GO:0030054|GO:0003416|GO:0008360|GO:0030154|GO:0043524|GO:0000166|GO:0016301|GO:0043025|GO:0043129|GO:0045446|GO:0038084|GO:0038083|GO:0001945|GO:0038085|GO:0016772|GO:0030335|GO:0005794|GO:0009986|GO:0007275|GO:0014068|GO:0018108|GO:0010595|GO:0016310|GO:0045165|GO:0005178|GO:0005887|GO:0045121|GO:0009897|GO:0043005|GO:0030949|GO:0035924|GO:0008284|GO:0032008|GO:0005886|GO:…	NM_010612	Mm.285	16542	1016.95	1621.58	10.3359	10.1998	1530.06	557.315	963.484	1602.38	1855.23	1407.13	10.448	9.87222	10.6875	10.2541	10.3235	10.0219
A_52_P467690	0.283243	0.418959	1.41432	up	NM_175836	chr11:30059308-30054358	Sptbn1	Mus musculus spectrin beta, non-erythrocytic 1 (Sptbn1), transcript variant 1, mRNA [NM_175836]	GO:0005515|GO:0007009|GO:0005516|GO:0008091|GO:0005886|GO:0043001|GO:0072661|GO:0032437|GO:0005634|GO:0032403|GO:0005622|GO:0005737|GO:0005543|GO:0030673|GO:0005856|GO:0070062|GO:0000281|GO:0071709|GO:0005730|GO:0005623|GO:0030506|GO:0003779|GO:0031430|GO:0051693|GO:0007182|GO:0043234|GO:0016020|GO:0007184|GO:0005200|GO:0030863	NM_175836	Mm.123110	20742	78.7256	119.093	6.83542	6.33531	72.4383	77.586	86.1524	121.335	121.711	114.233	6.0435	7.18685	7.27591	6.48507	6.25954	6.26133
A_55_P2143869	0.0323416	0.117831	1.70522	up	XM_006544802	chr4:113613242-113613183	Skint5	selection and upkeep of intraepithelial T cells 5 [Source:MGI Symbol;Acc:MGI:3650151] [ENSMUST00000153413]	GO:0008150|GO:0003674|GO:0016020|GO:0016021|GO:0005575	XM_006544802	Mm.484115	242627	20.5839	25.9216	4.8938	4.12384	26.6325	16.0488	19.0704	27.9271	28.9096	20.9281	4.55892	4.99317	5.12933	4.37109	4.19297	3.80747
A_55_P1953998	0.0242444	0.1012	1.53874	up	NM_183355	chr1:170083754-170083695	Pbx1	Mus musculus pre B cell leukemia homeobox 1 (Pbx1), transcript variant a, mRNA [NM_183355]	GO:0005515|GO:0006694|GO:0001658|GO:0008284|GO:0003700|GO:0006366|GO:0030325|GO:0001655|GO:0048706|GO:0048538|GO:0005634|GO:0009954|GO:0030326|GO:0048536|GO:0009952|GO:0043433|GO:0030154|GO:0005737|GO:0030278|GO:0048568|GO:0045944|GO:0042127|GO:0009887|GO:0007548|GO:0035162|GO:0005667|GO:0006355|GO:0046982|GO:0007275|GO:0003677|GO:0006351|GO:0043565|GO:0001077|GO:0010971|GO:0045665|GO:0008134	NM_183355	Mm.43358	18514	727.369	889.132	9.91952	9.29777	977.131	531.697	673.278	762.913	863.934	1040.55	9.80603	9.80523	10.1473	9.15682	9.17004	9.56646
A_55_P1988259	0.437794	0.565591	1.11423	up	NM_010318	chr3:146168390-146168449	Gng5	Mus musculus guanine nucleotide binding protein (G protein), gamma 5 (Gng5), mRNA [NM_010318]	GO:0005739|GO:0030165|GO:0070062	NM_010318	Mm.140804	14707	10391.6	15693.8	13.6941	13.538	13557.9	10125.2	7491.79	18128.7	15737	13215.6	13.5411	13.956	13.5851	13.7697	13.5017	13.3427
A_52_P518076	0.715313	0.796857	1.16836	up	NM_001162925	chr3:96510969-96510910	Nudt17	Mus musculus nudix (nucleoside diphosphate linked moiety X)-type motif 17 (Nudt17), transcript variant 2, mRNA [NM_001162925]	GO:0008150|GO:0016787|GO:0005575|GO:0046872	NM_001162925	Mm.423186	78373	9.54749	18.7445	3.85858	3.6341	6.42433	9.68699	12.5311	13.0664	21.0804	22.0867	2.78313	4.26375	4.52886	3.27655	3.7431	3.88266
A_55_P2122841	0.287661	0.423293	1.35423	up		chr8:035370276-035370217							949.267	1345.05	10.341	9.90353	951.49	954.273	942.039	1138.59	1170.4	1726.16	9.76748	10.5973	10.6583	9.75629	9.6329	10.3214
A_55_P2015292	0.0360497	0.124796	2.35921	up	NM_008521	chr11:50050031-50049974	Ltc4s	Mus musculus leukotriene C4 synthase (Ltc4s), mRNA [NM_008521]	GO:0019370|GO:0046982|GO:0005783|GO:0005634|GO:0005635|GO:0004364|GO:0004464|GO:0006691|GO:0016829|GO:0043231|GO:0008289|GO:0004602|GO:0043295|GO:0016020|GO:0016021|GO:0008047|GO:0055114	NM_008521	Mm.245151	17001	517.817	450.423	9.46973	8.23143	530.315	413.795	609.34	288.352	570.142	492.776	8.92336	9.47848	10.0074	7.74277	8.54106	8.41046
A_55_P2039205	0.0179008	0.0872609	4.03411	up	NM_001081293	chr3:95578123-95578064	Rprd2	Mus musculus regulation of nuclear pre-mRNA domain containing 2 (Rprd2), mRNA [NM_001081293]	GO:0008150|GO:0003674|GO:0016591	NM_001081293	Mm.196275	75137	33.6354	18.6446	5.61216	3.59991	30.3641	37.4014	33.1409	10.5626	25.2993	20.0718	4.75007	6.17263	5.91377	3.05968	3.99456	3.74547
A_51_P490678	0.358157	0.491822	1.31752	up	NM_198012	chr7:109826406-109826347	Trim68	Mus musculus tripartite motif-containing 68 (Trim68), mRNA [NM_198012]	GO:0035035|GO:0004842|GO:0005794|GO:0016874|GO:0005730|GO:0060765|GO:0005634|GO:0050681|GO:0046872|GO:0051865|GO:0005622|GO:0005737|GO:0008270	NM_198012	Mm.39043	101700	197.01	312.678	8.12741	7.72959	189.343	232.962	168.724	245.103	364.406	328.525	7.44422	8.70438	8.23365	7.51436	7.86892	7.80548
A_51_P430082	0.364504	0.497771	1.20431	up	NM_009437	chr15:78230117-78230058	Tst	Mus musculus thiosulfate sulfurtransferase, mitochondrial (Tst), mRNA [NM_009437]	GO:0005739|GO:0003723|GO:0030855|GO:0005743|GO:0051029|GO:0008097|GO:0004792|GO:0005615|GO:0035928|GO:0016740	NM_009437	Mm.15312	22117	157.306	273.184	7.81883	7.55062	175.007	134.785	162.125	275.689	271.992	271.87	7.32838	7.95484	8.17326	7.68295	7.45125	7.51766
A_52_P257523	0.0390518	0.130033	1.65741	up	NM_001142727	chr4:124526929-124526870	1110065P20Rik	Mus musculus RIKEN cDNA 1110065P20 gene (1110065P20Rik), mRNA [NM_001142727]	GO:0008150|GO:0003674|GO:0005575	NM_001142727	Mm.387568	68920	1336.88	1494.22	10.8161	10.0872	1431.41	1336.52	1242.72	1548.03	1525.58	1409.06	10.3487	11.0636	11.0361	10.2048	10.0327	10.0242
A_51_P378210	0.955064	0.970537	1.03331	up	NM_008190	chr4:119311857-119311916	Guca2a	Mus musculus guanylate cyclase activator 2a (guanylin) (Guca2a), mRNA [NM_008190]	GO:0030250|GO:0031284|GO:0005576|GO:0008047	NM_008190	Mm.2614	14915	2354.16	3611.68	11.4301	11.3829	1020.98	3293.15	2748.35	3000.15	4079.39	3755.49	9.87339	12.3026	12.1144	11.1584	11.5029	11.4873
A_51_P357744	0.106697	0.228456	1.39633	up	NM_010592	chr8:73224436-73224495	Jund	Mus musculus jun D proto-oncogene (Jund), transcript variant 1, mRNA [NM_010592]	GO:0005515|GO:0016922|GO:0006355|GO:0003700|GO:0006366|GO:0044212|GO:0005634|GO:0003677|GO:0006351|GO:0045669|GO:0043565|GO:0043234|GO:0003690|GO:0002076|GO:0045944|GO:0071277	NM_010592	Mm.419851	16478	10860	13330.2	13.7991	13.3175	11960.5	10740.4	9879.05	13497.1	12497.2	13996.2	13.3579	14.0481	13.9913	13.3498	13.1823	13.4203
A_52_P662998	0.301724	0.436439	2.36751	up	XR_381666	chr12:72484608-72484549	1700083H02Rik	PREDICTED: Mus musculus RIKEN cDNA 1700083H02 gene (1700083H02Rik), misc_RNA [XR_381666]		XR_381666	Mm.54261	67348	32.9344	25.3449	5.2833	4.03993	11.3611	57.3641	30.0779	17.4778	35.4123	23.1446	3.31362	6.75624	5.78004	3.6979	4.47346	3.94844
A_51_P401343	0.0143122	0.0777009	1.31517	up	NM_019500	chr16:93919730-93919671	Cldn14	Mus musculus claudin 14 (Cldn14), transcript variant 1, mRNA [NM_019500]	GO:0005515|GO:0030054|GO:0016020|GO:0005886|GO:0005783|GO:0005198|GO:0016021|GO:0005923	NM_019500	Mm.328716	56173	72.4525	115.157	6.6804	6.28515	99.6041	57.6087	60.1447	103.163	128.838	113.471	6.50109	6.76373	6.77639	6.25426	6.3496	6.25161
A_51_P122845	0.0115295	0.0704445	1.85519	up	NM_028108	chr16:44163398-44163457	Naa50	Mus musculus N(alpha)-acetyltransferase 50, NatE catalytic subunit (Naa50), mRNA [NM_028108]	GO:0005515|GO:0031415|GO:0008080|GO:0016746|GO:0004596|GO:0052858|GO:0005737|GO:0071962|GO:0043967|GO:0010485|GO:0016740|GO:0006474|GO:0070062	NM_028108	Mm.278726	72117	443.55	478.802	9.25791	8.36634	521.53	449.777	359.342	428.92	527.739	479.746	8.89942	9.58644	9.28787	8.30353	8.42109	8.37441
A_51_P221362	0.00257286	0.0394977	1.27829	up	NM_001163635	chr19:36967293-36967352	Tnks2	Mus musculus tankyrase, TRF1-interacting ankyrin-related ADP-ribose polymerase 2 (Tnks2), mRNA [NM_001163635]	GO:0000209|GO:0048471|GO:0000781|GO:0005794|GO:0016757|GO:0005694|GO:0090263|GO:0005634|GO:0005635|GO:0046872|GO:0003950|GO:0070213|GO:0006471|GO:0005737|GO:0035264|GO:0000723|GO:0016020|GO:0040014|GO:0019899|GO:0016055|GO:0070198|GO:0000242|GO:0016740	NM_001163635	Mm.249310	74493	5625.36	7307.79	12.7975	12.4432	7853.22	4623.47	4399.39	6691.18	7690.84	7541.33	12.7751	12.8046	12.8127	12.3453	12.4644	12.5201
A_55_P2184508	0.173421	0.304322	1.15381	up		chr17:028863380-028863439							8171.48	11668.2	13.3258	13.1194	11317.2	7534.82	5662.44	12460.2	12167.1	10377.3	13.2894	13.5143	13.1739	13.233	13.1468	12.9786
A_52_P238242	0.895956	0.930482	1.02051	up	NM_021372	chr11:20552457-20552516	Sertad2	Mus musculus SERTA domain containing 2 (Sertad2), transcript variant 1, mRNA [NM_021372]	GO:0005515|GO:0030308|GO:0006355|GO:0005737|GO:0003713|GO:0005634|GO:0045893|GO:0006351	NM_021372	Mm.339676	58172	1028.81	1773.91	10.3434	10.3141	1650.51	692.779	743.151	1301.47	2109.19	1911.09	10.5605	10.1692	10.3006	9.9632	10.5139	10.4653
A_55_P2113391	0.577271	0.685801	1.12796	up		chr6:015355616-015355675							23.9631	40.3763	4.90413	4.73041	44.8741	12.0094	15.0056	28.0321	49.0726	44.0242	5.33205	4.58107	4.79926	4.375	4.95942	4.85679
A_55_P2049582	0.231123	0.366278	1.27185	up	NM_146085	chr18:36830873-36830814	Apbb3	Mus musculus amyloid beta (A4) precursor protein-binding, family B, member 3 (Apbb3), mRNA [NM_146085]	GO:0043066|GO:0005737|GO:0001540|GO:0015629	NM_146085	Mm.89673	225372	885.149	1200.86	10.1119	9.76498	1348	840.264	467.188	1180.3	1186.12	1236.18	10.2614	10.4314	9.64296	9.81701	9.65404	9.8239
A_51_P419759	0.0197073	0.0912255	3.07496	up	NM_027919	chr11:117729712-117729653	Tha1	Mus musculus threonine aldolase 1 (Tha1), mRNA [NM_027919]	GO:0008150|GO:0003674|GO:0005575	NM_027919	Mm.3200	71776	159.924	117.043	7.81364	6.19307	208.016	159.046	112.71	58.7158	135.456	156.959	7.58831	8.1888	7.66381	5.43824	6.42284	6.71815
A_55_P2080649	0.294339	0.429251	1.23969	up	NM_183140	chr4:118842372-118842313	Zfp691	Mus musculus zinc finger protein 691 (Zfp691), transcript variant 1, mRNA [NM_183140]	GO:0008150|GO:0006355|GO:0005634|GO:0003676|GO:0003677|GO:0046872|GO:0006351	NM_183140	Mm.169620	195522	259.006	415.643	8.43867	8.12869	403.855	201.405	171.757	511.164	424.201	311.565	8.54477	8.51205	8.25918	8.56531	8.08603	7.73474
A_55_P1998854	0.102359	0.223563	1.44002	up									56.176	83.685	6.33697	5.81088	68.2014	56.7145	43.6121	68.9778	101.066	81.0112	5.95279	6.74204	6.31609	5.66785	6.00445	5.76035
A_52_P684087	0.0781233	0.192427	2.23214	up	XM_006513889	chr10:62563489-62563548	Atoh7	PREDICTED: Mus musculus atonal homolog 7 (Drosophila) (Atoh7), transcript variant X1, mRNA [XM_006513889]	GO:0021554|GO:0006355|GO:0003407|GO:0009649|GO:0046983|GO:0007623|GO:0007275|GO:0005634|GO:0003677|GO:0030154|GO:0006351|GO:0007399	XM_006513889	Mm.228661	53404	20.6167	18.6744	4.80769	3.64927	21.0974	10.9994	29.7534	15.2841	19.8445	20.8947	4.20357	4.45632	5.7632	3.48594	3.6572	3.80466
A_55_P2011106	0.00504511	0.0503148	4.53786	up	NM_008416	chr8:87501940-87501881	Junb	Mus musculus jun B proto-oncogene (Junb), mRNA [NM_008416]	GO:0005515|GO:0006355|GO:0000977|GO:0003700|GO:0006366|GO:0033687|GO:0009987|GO:0045597|GO:0060136|GO:0030316|GO:0005634|GO:0001829|GO:0001701|GO:0003677|GO:0001649|GO:0006351|GO:0043565|GO:0046697|GO:0003690|GO:0071277|GO:0060716|GO:0051726|GO:0001570	NM_008416	Mm.1167	16477	107.883	50.5444	7.26596	5.08395	104.299	129.645	89.7044	44.2772	55.1443	52.2117	6.56004	7.905	7.33284	5.0275	5.12477	5.09957
A_51_P385099	0.0600078	0.165378	2.56056	up	NM_013693	chr17:35336854-35336795	Tnf	Mus musculus tumor necrosis factor (Tnf), transcript variant 1, mRNA [NM_013693]	GO:0032755|GO:0005515|GO:0019722|GO:0032715|GO:0001819|GO:0002020|GO:0005615|GO:0005622|GO:0031622|GO:0030730|GO:0030198|GO:0000165|GO:0042127|GO:0034116|GO:0009887|GO:0031663|GO:0000060|GO:0032729|GO:0005164|GO:0002876|GO:0009986|GO:0001891|GO:0006952|GO:0007275|GO:0032722|GO:0000122|GO:0005125|GO:0033209|GO:0005887|GO:0009897|GO:0008625|GO:0002439|GO:0008284|GO:0008285|GO:0005886|GO:0008283|GO:…	NM_013693	Mm.1293	21926	62.085	48.0084	6.31822	4.96177	88.1508	73.2542	24.8501	32.4269	46.0482	65.5501	6.33108	7.10508	5.51852	4.59082	4.85821	5.43627
A_55_P2041363	0.162122	0.292367	2.64551	up		chr9:044102039-044101980		Q8K0H2_MOUSE (Q8K0H2) Chpt1 protein, partial (17%) [TC1623546]					38.8934	28.3137	5.65954	4.25599	19.4571	60.6058	36.6173	24.6867	30.2259	30.0284	4.08416	6.83642	6.05804	4.19104	4.25507	4.32188
A_55_P2123220	0.794032	0.855843	1.01162	up	NM_177766	chr8:75005983-75005924	Slc35e1	Mus musculus solute carrier family 35, member E1 (Slc35e1), mRNA [NM_177766]	GO:0008150|GO:0003674|GO:0016020|GO:0006810|GO:0016021|GO:0005575	NM_177766	Mm.291461	270066	138.542	271.993	7.55912	7.54245	214.741	98.2624	102.623	258.728	298.525	258.725	7.63696	7.51641	7.524	7.59384	7.58128	7.45223
A_51_P481482	0.680172	0.769459	1.09878	up	NM_027878	chr10:87786227-87786168	Dram1	Mus musculus DNA-damage regulated autophagy modulator 1 (Dram1), mRNA [NM_027878]	GO:0003674|GO:0005737|GO:0030262|GO:0016020|GO:0006914|GO:0006915|GO:0016021|GO:0005764	NM_027878	Mm.35450	71712	75.3659	145.951	6.74478	6.60888	88.1274	53.0605	84.9098	110.576	156.299	170.979	6.33051	6.64898	7.25483	6.34989	6.63546	6.84128
A_55_P1974367	0.514692	0.632919	1.09394	up	NM_010174	chr4:129992643-129992702	Fabp3	Mus musculus fatty acid binding protein 3, muscle and heart (Fabp3), mRNA [NM_010174]	GO:0008092|GO:0042632|GO:0005215|GO:0005504|GO:0005324|GO:2001245|GO:0050543|GO:0046320|GO:0005829|GO:0008289|GO:0036041|GO:0005737|GO:0016528|GO:0071073|GO:0070538|GO:0006810|GO:0055091|GO:0015909|GO:0044539|GO:0070062	NM_010174	Mm.388886	14077	34.0053	62.261	5.51333	5.3838	56.03	24.2804	21.7053	58.4877	54.4975	73.7978	5.65856	5.56764	5.31378	5.43193	5.10464	5.61483
A_55_P2005753	0.0112513	0.0697952	1.48435	up	NM_026968	chr2:157222439-157222498	Manbal	Mus musculus mannosidase, beta A, lysosomal-like (Manbal), mRNA [NM_026968]	GO:0008150|GO:0003674|GO:0016020|GO:0016021|GO:0005575	NM_026968	Mm.228619	69161	700.372	893.528	9.87691	9.30708	906.473	652.378	542.266	787.006	995.554	898.023	9.69215	10.0897	9.84885	9.20104	9.38578	9.33441
A_51_P110759	0.075782	0.189357	2.17877	up	NM_009199	chr19:28988332-28988391	Slc1a1	Mus musculus solute carrier family 1 (neuronal/epithelial high affinity glutamate transporter, system Xag), member 1 (Slc1a1), mRNA [NM_009199]	GO:0005515|GO:0015501|GO:0005886|GO:0051938|GO:0070779|GO:0005313|GO:0015813|GO:0016020|GO:0006810|GO:0006835|GO:0051260|GO:0035725|GO:0016021|GO:0016595|GO:0017153|GO:0070062|GO:0015293	NM_009199	Mm.246670	20510	451.926	434.112	9.27222	8.1487	439.305	562.865	353.608	263.467	634.531	404.339	8.66554	9.88417	9.26695	7.62184	8.7082	8.11607
A_55_P1984113	0.202369	0.33547	1.18863	up	NM_053074	chr7:52086086-52086145	Nup62	Mus musculus nucleoporin 62 (Nup62), mRNA [NM_053074]	GO:0005515|GO:0008219|GO:0043130|GO:0008285|GO:0051425|GO:0030159|GO:0005634|GO:0005635|GO:0015031|GO:0043231|GO:0046966|GO:0046580|GO:0043069|GO:0005737|GO:0005643|GO:0043407|GO:0006810|GO:0017056|GO:0005856|GO:0043123|GO:0042169|GO:0031965|GO:0043066|GO:0007569|GO:0042059|GO:0006351|GO:0016477|GO:0030529|GO:0051028|GO:0045893|GO:0007166	NM_053074	Mm.2565	18226	1378.84	2120.31	10.8498	10.6005	1638.27	1363.59	1134.65	1978.75	2345.5	2036.68	10.5476	11.0935	10.9081	10.5589	10.6659	10.5766
A_55_P2018701	0.0861088	0.203259	1.60717	up	NM_029366	chr8:73037631-73037572	Kxd1	Mus musculus KxDL motif containing 1 (Kxd1), mRNA [NM_029366]	GO:0005515|GO:0031083|GO:0016192	NM_029366	Mm.482129	75620	565.107	691.016	9.59843	8.91391	582.684	477.711	634.927	573.514	776.108	723.426	9.068	9.66341	10.0639	8.74014	9.00325	8.99834
A_55_P2170539	0.0937277	0.212543	2.05097	up		chr6:048016024-048015965							21.0297	15.8621	4.45124	3.41493	46.5556	8.22959	8.3039	15.3017	17.4339	14.8505	5.38878	4.02061	3.94432	3.48763	3.46404	3.29311
A_55_P2066180	0.505008	0.624014	1.07968	up	NM_175454	chr11:115209083-115209024	Hid1	Mus musculus HID1 domain containing (Hid1), mRNA [NM_175454]	GO:0005881|GO:0003674|GO:0031001|GO:0005737|GO:0005794|GO:0016020|GO:0000138|GO:0005797|GO:0006886	NM_175454	Mm.205707	217310	986.763	1686.58	10.374	10.2634	1239.86	889.701	830.724	1679.39	1557.12	1823.22	10.1473	10.5045	10.4703	10.3253	10.0685	10.3964
A_55_P2070054	0.106607	0.228422	1.38155	up	NM_030702	chr11:69486679-69486620	Senp3	Mus musculus SUMO/sentrin specific peptidase 3 (Senp3), transcript variant 1, mRNA [NM_030702]	GO:0005515|GO:0005737|GO:0004843|GO:0016787|GO:0071339|GO:0006508|GO:0005730|GO:0008233|GO:0005634|GO:0008234|GO:0019538	NM_030702	Mm.284592	80886	2289.49	2971.5	11.5646	11.0983	2509.37	2401.15	1957.96	3188.36	2905.61	2820.53	11.1602	11.8712	11.6623	11.2476	10.9888	11.0585
A_55_P2063256	0.0498623	0.148776	1.35506	up	NM_010706	chr7:29626661-29626720	Lgals4	Mus musculus lectin, galactose binding, soluble 4 (Lgals4), mRNA [NM_010706]	GO:0005515|GO:0030246	NM_010706	Mm.210336	16855	74328.1	106702	16.6687	16.2303	106735	56154.2	60094.8	105632	114482	99991.2	16.3728	16.7457	16.8876	16.186	16.3023	16.2027
A_51_P282837	0.233981	0.369373	1.15367	up	NM_011176	chr9:30897308-30897249	St14	Mus musculus suppression of tumorigenicity 14 (colon carcinoma) (St14), mRNA [NM_011176]	GO:0004252|GO:0005576|GO:0003824|GO:0005615|GO:0016323|GO:0016020|GO:0016477|GO:0016787|GO:0005887|GO:0006508|GO:0008236|GO:0008233|GO:0016021|GO:0019897	NM_011176	Mm.243926	19143	3605.83	5320.25	12.1849	11.9787	4450.67	3081.93	3284.91	5459.3	5872.18	4629.28	11.9626	12.2132	12.3788	12.0609	12.0643	11.8107
A_55_P1995449	0.881672	0.920707	1.01559	up		chr11:083459007-083458946							701.837	1292.21	9.88232	9.86	899.253	605.985	600.273	1075.17	1489.4	1312.04	9.67921	9.98321	9.98452	9.67101	9.99543	9.91355
A_52_P79513	0.179542	0.310573	1.89384	up	NM_023750	chr7:30562247-30562306	Zfp84	Mus musculus zinc finger protein 84 (Zfp84), mRNA [NM_023750]	GO:0008150|GO:0003674|GO:0005575|GO:0046872	NM_023750	Mm.251083	74352	19.0742	21.5624	4.78046	3.85915	15.3626	21.9267	19.9333	25.1954	20.8431	18.6487	3.71643	5.43501	5.18994	4.22113	3.72542	3.6309
A_51_P153683	0.547908	0.660591	1.04236	up	NM_146117	chr2:25146559-25146618	Lrrc26	Mus musculus leucine rich repeat containing 26 (Lrrc26), mRNA [NM_146117]	GO:0008150|GO:0005737|GO:0016020|GO:0005886|GO:0008076|GO:0006810|GO:0015459|GO:0016021|GO:0005856|GO:0070062|GO:0006811	NM_146117	Mm.275228	227618	370.121	688.646	8.97588	8.91603	524.713	264.596	321.053	611.308	741.203	713.428	8.90959	8.88046	9.13759	8.83629	8.9356	8.9762
A_51_P239673	0.77813	0.844358	1.03202	up	NM_013556	chrX:50374757-50374816	Hprt	Mus musculus hypoxanthine guanine phosphoribosyl transferase (Hprt), mRNA [NM_013556]	GO:0046040|GO:0046083|GO:0046872|GO:0042803|GO:0005829|GO:0042802|GO:0045964|GO:0006178|GO:0005737|GO:0042417|GO:0000166|GO:0051289|GO:0032264|GO:0019835|GO:0032263|GO:0046038|GO:0007626|GO:0043103|GO:0007625|GO:0021895|GO:0070062|GO:0000287|GO:0016757|GO:0052657|GO:0004422|GO:0021954|GO:0048813|GO:0006166|GO:0021756|GO:0001975|GO:0006168|GO:0046100|GO:0009116|GO:0046651|GO:0016740|GO:0006164	NM_013556	Mm.299381	15452	3950.89	6415.24	12.3071	12.2617	4857.99	3984.13	3010.54	6249.94	6548.73	6447.06	12.0841	12.5895	12.2477	12.249	12.2272	12.3088
A_55_P2060158	0.206145	0.339729	1.48176	up	NM_029972	chr2:57897613-57897554	Ermn	Mus musculus ermin, ERM-like protein (Ermn), mRNA [NM_029972]	GO:0008360|GO:0033270|GO:0003779|GO:0030175|GO:0005737|GO:0031344|GO:0033269|GO:0051015|GO:0043209|GO:0043025|GO:0007015|GO:0005856|GO:0005938|GO:0070062|GO:0001763	NM_029972	Mm.91712	77767	90.9333	130.986	7.03674	6.46943	88.2316	104.658	79.9105	115.818	149.779	127.36	6.33273	7.59956	7.17794	6.41588	6.57688	6.41553
A_55_P2022241	0.0568677	0.160509	1.65304	up	NM_013702	chr5:140023669-140023728	Uncx	Mus musculus UNC homeobox (Uncx), mRNA [NM_013702]	GO:0010468|GO:0007389|GO:0006355|GO:0003700|GO:0005634|GO:0007275|GO:0003677|GO:0006351|GO:0021516|GO:0030154|GO:0007399|GO:0043565|GO:0001502|GO:0021889|GO:0045595|GO:0035726	NM_013702	Mm.42190	22255	23.9961	31.3275	5.1354	4.41028	27.861	21.9755	22.1518	30.887	29.8408	33.2548	4.62022	5.43936	5.34663	4.52225	4.2373	4.47129
A_51_P121302	0.461502	0.585806	1.08196	up	NM_029431	chr3:94135723-94135782	Them4	Mus musculus thioesterase superfamily member 4 (Them4), mRNA [NM_029431]	GO:0006629|GO:0005886|GO:0016290|GO:0005743|GO:0006915|GO:0042995|GO:0005829|GO:0005739|GO:0005737|GO:0016020|GO:0016787|GO:0043491|GO:0006631|GO:0016032	NM_029431	Mm.45092	75778	429.631	752.014	9.1607	9.04706	629.644	274.502	384.745	672.569	805.249	778.224	9.16925	8.92537	9.38749	8.97261	9.05379	9.11477
A_55_P2082393	0.264334	0.400244	1.495	up	NM_001081392	chr4:32861180-32861239	Mdn1	Mus musculus midasin homolog (yeast) (Mdn1), mRNA [NM_001081392]	GO:0008150|GO:0003674|GO:0005737|GO:0000166|GO:0005730|GO:0005634|GO:0045111|GO:0005524	NM_001081392	Mm.24627	100019	98.24	139.506	7.13824	6.5581	86.1689	119.05	89.5008	117.685	158.865	141.969	6.29421	7.79165	7.32886	6.44034	6.65974	6.57422
A_51_P184223	0.168255	0.29879	1.30567	up	NM_053132	chr18:37504330-37504389	Pcdhb7	Mus musculus protocadherin beta 7 (Pcdhb7), mRNA [NM_053132]	GO:0016020|GO:0005886|GO:0016021|GO:0007155	NM_053132	Mm.44755	93878	30.8787	50.83	5.45968	5.07489	40.621	20.5355	31.4798	40.5203	61.8967	50.073	5.18789	5.34256	5.84859	4.90126	5.28561	5.03779
A_51_P466162	0.395108	0.525573	1.1539	up	NM_007573	chr11:70791502-70791443	C1qbp	Mus musculus complement component 1, q subcomponent binding protein (C1qbp), mRNA [NM_007573]	GO:0005515|GO:0008380|GO:0051897|GO:0050687|GO:0030984|GO:0030449|GO:0048025|GO:0005886|GO:0070131|GO:0005634|GO:0003729|GO:0005615|GO:2000510|GO:0005829|GO:0005739|GO:0005737|GO:1900026|GO:0005540|GO:0005759|GO:0039536|GO:0005080|GO:0006958|GO:0097177|GO:0032689|GO:0006397|GO:0006355|GO:0043065|GO:0042256|GO:0009986|GO:0042254|GO:0003714|GO:0001849|GO:0006915|GO:0039534|GO:0005576|GO:0000122|GO:…	NM_007573	Mm.30049	12261	6248.02	9283.51	12.9944	12.7879	6943.4	6650.15	5150.51	9324.73	9895.07	8630.74	12.6027	13.3424	13.0381	12.8158	12.8234	12.7244
A_51_P419017	0.351114	0.485184	1.61601	up	NM_011866	chr17:9174995-9175054	Pde10a	Mus musculus phosphodiesterase 10A (Pde10a), transcript variant 2, mRNA [NM_011866]	GO:0008081|GO:0004114|GO:0004118|GO:0004112|GO:0047555|GO:0046069|GO:0010738|GO:0003824|GO:0046872|GO:0007165|GO:0005737|GO:0030552|GO:0030553|GO:0016787|GO:0000166|GO:0016020|GO:0043949|GO:0008144|GO:0008152|GO:0043025|GO:0043204|GO:0006198	NM_011866	Mm.87161	23984	10.2655	14.1062	3.95164	3.25921	5.96839	13.0949	11.7333	8.99003	14.4762	18.8523	2.72056	4.70545	4.42891	2.90635	3.22527	3.64601
A_55_P2083794	0.0873569	0.204784	1.72027	up	NM_145586	chr7:127264432-127264491	Tmem159	Mus musculus transmembrane protein 159 (Tmem159), mRNA [NM_145586]	GO:0008150|GO:0003674|GO:0016020|GO:0016021|GO:0005575	NM_145586	Mm.257952	233806	236.581	286.97	8.39975	7.61712	228.787	261.897	219.057	251.132	317.987	291.793	7.72529	8.8683	8.60566	7.55201	7.67003	7.62931
A_51_P345747	0.0297761	0.112351	2.63652	up	NM_172726	chr5:144063232-144063173	E130309D02Rik	Mus musculus RIKEN cDNA E130309D02 gene (E130309D02Rik), mRNA [NM_172726]	GO:0008150|GO:0003674|GO:0005575	NM_172726	Mm.440105	231868	362.364	278.581	8.97018	7.57155	329.181	462.297	295.614	316.695	251.841	267.206	8.26636	9.6208	9.02339	7.87769	7.34089	7.49605
A_55_P2081408	0.315583	0.450447	1.15209	up	NM_001099688	chr11:72132654-72132713	Fbxo39	Mus musculus F-box protein 39 (Fbxo39), mRNA [NM_001099688]	GO:0008150|GO:0003674|GO:0005575	NM_001099688	Mm.390365	628100	20.5393	37.534	4.84905	4.64479	29.2432	13.269	19.1057	29.3114	40.8248	42.466	4.6912	4.72388	5.13206	4.44352	4.67818	4.81269
A_51_P419117	0.134809	0.261761	1.17256	up	NM_134050	chr12:77899050-77898991	Rab15	Mus musculus RAB15, member RAS oncogene family (Rab15), mRNA [NM_134050]	GO:0005515|GO:0008150|GO:0016020|GO:0005886|GO:0000166|GO:0007264|GO:0006810|GO:0005575|GO:0015031|GO:0005525	NM_134050	Mm.172847	104886	712.345	1129.23	9.90186	9.6722	916.823	639.191	581.023	1176.48	1149.25	1061.97	9.7123	10.0556	9.93771	9.81269	9.60618	9.59774
A_51_P106752	0.0118742	0.0713184	1.538	up	NM_026440	chr18:68483222-68483282	Rnmt	Mus musculus RNA (guanine-7-) methyltransferase (Rnmt), transcript variant 1, mRNA [NM_026440]	GO:0043235|GO:0006397|GO:0003723|GO:0008168|GO:0004482|GO:0006370|GO:0080009|GO:0005634|GO:0032259|GO:0016740|GO:0005845	NM_026440	Mm.27544	67897	29.6498	41.2268	5.40834	4.78728	40.5293	22.0756	26.3446	33.8971	47.8851	41.8982	5.18457	5.4468	5.59365	4.65384	4.91735	4.79066
A_55_P2292737	0.10925	0.231235	1.63885	up	NR_077063	chr7:51000895-51000836	2310002F09Rik	Mus musculus RIKEN cDNA 2310002F09 gene (2310002F09Rik), long non-coding RNA [NR_077063]	GO:0008150|GO:0003674|GO:0005575	NR_077063	Mm.226595	100504720	2811.48	3134.13	11.8385	11.1258	3270.09	2574.9	2589.47	2087.86	3044.52	4270.01	11.5131	11.9736	12.0288	10.6328	11.058	11.6867
A_51_P355172	0.464327	0.588296	1.22778	up	AK004585	chr12:40951741-40951800	Gm7008	Mus musculus adult male lung cDNA, RIKEN full-length enriched library, clone:1200003N10 product:hypothetical protein, full insert sequence. [AK004585]	GO:0008150|GO:0003674|GO:0005575			629820	32.4385	56.0231	5.53362	5.23756	35.1813	22.1225	40.0118	56.7204	59.5313	51.8176	4.96418	5.44855	6.18812	5.38971	5.23445	5.08853
A_52_P262967	0.136656	0.263619	1.21883	up	NM_016676	chr12:3252687-3252628	Rab10	Mus musculus RAB10, member RAS oncogene family (Rab10), mRNA [NM_016676]	GO:0005802|GO:0005515|GO:0048471|GO:0005886|GO:0005783|GO:0007264|GO:0003924|GO:0042995|GO:0007409|GO:0015031|GO:0006886|GO:0005622|GO:0097051|GO:0000166|GO:0019882|GO:0016197|GO:0006810|GO:0016192|GO:0070062|GO:0032869|GO:0005794|GO:0071782|GO:0071786|GO:0005623|GO:0072372|GO:0045200|GO:0006893|GO:0031410|GO:0005525|GO:0072659|GO:0006184|GO:0031489|GO:0016020|GO:0032593|GO:0005789|GO:0055037|GO:…	NM_016676	Mm.378993	19325	1378.23	2062.24	10.836	10.5505	1734.07	1368.5	1032.11	2059.27	2282.89	1844.57	10.6279	11.0983	10.7818	10.6092	10.6246	10.4178
A_51_P378789	0.0191746	0.0900324	10.5223	up	NM_018866	chr5:96389861-96389920	Cxcl13	Mus musculus chemokine (C-X-C motif) ligand 13 (Cxcl13), mRNA [NM_018866]	GO:0035769|GO:0035768|GO:0048248|GO:0007267|GO:0033625|GO:2000273|GO:0007204|GO:0005615|GO:0002518|GO:0048535|GO:0006955|GO:0031724|GO:0006954|GO:0006935|GO:0008201|GO:0042742|GO:0048018|GO:0008009|GO:0070098|GO:0046982|GO:0017134|GO:0010820|GO:2000545|GO:0005576|GO:0032861|GO:0033634|GO:0005125|GO:0031735|GO:0035754|GO:0007166	NM_018866	Mm.10116	55985	1922.49	489.289	11.3271	7.93168	1910.24	1787.68	2069.56	206.13	190.674	1071.06	10.7625	11.4804	11.7383	7.25337	6.92927	9.61241
A_51_P126835	0.00729078	0.0585166	2.8132	up	NM_001025102	chr2:106804673-106804614	Arl14ep	Mus musculus ADP-ribosylation factor-like 14 effector protein (Arl14ep), transcript variant 1, mRNA [NM_001025102]	GO:0008150|GO:0003674|GO:0005737	NM_001025102	Mm.381231	212772	273.575	173.327	8.37546	6.88325	497.593	196.613	126.52	158.612	179.562	181.808	8.82779	8.47759	7.82102	6.87769	6.8423	6.92978
A_55_P2099379	0.010577	0.0676947	1.94288	up	NM_001271490	chrX:7352069-7352128	Tfe3	Mus musculus transcription factor E3 (Tfe3), transcript variant 5, mRNA [NM_001271490]	GO:0005667|GO:0006355|GO:0003700|GO:0046982|GO:0044212|GO:0005634|GO:0045670|GO:0003677|GO:0006351|GO:0045785|GO:0005737|GO:0045944|GO:0006959|GO:0046983|GO:0045893|GO:0002376	NM_001271490	Mm.249142	209446	686.081	683.247	9.85356	8.89537	861.619	649.175	547.449	788.363	610.323	651.053	9.61645	10.081	9.86324	9.20454	8.64853	8.83302
A_55_P2017851	0.231786	0.366936	1.3731	up	XM_006544175		LOC102641427	PREDICTED: Mus musculus 40S ribosomal protein SA-like (LOC102641427), mRNA [XM_006544175]		XM_006544175		102641427	4595.37	5737.28	12.5565	12.0991	4341.41	4421.94	5022.77	5403.53	5901.16	5907.14	11.928	12.7486	12.993	12.0429	12.0735	12.1808
A_51_P513072	0.792688	0.854867	1.01791	up	NM_175372	chr7:4377847-4377788	Rdh13	Mus musculus retinol dehydrogenase 13 (all-trans and 9-cis) (Rdh13), transcript variant 1, mRNA [NM_175372]	GO:0005739|GO:0008152|GO:0016491|GO:0010842|GO:0042462|GO:0009644|GO:0055114	NM_175372	Mm.413106	108841	154.795	302.989	7.71417	7.68856	240.951	109.145	114.29	283.363	349.507	276.097	7.80806	7.65514	7.67931	7.71912	7.80548	7.54106
A_55_P2180121	0.0174749	0.0861298	2.75862	up	NM_173758	chr14:79349324-79349383	Vwa8	Mus musculus von Willebrand factor A domain containing 8 (Vwa8), transcript variant 2, mRNA [NM_173758]	GO:0005739|GO:0008150|GO:0003674|GO:0017111|GO:0000166|GO:0005576|GO:0016887|GO:0005524	NM_173758	Mm.159651	219189	90.393	72.0082	7.03061	5.56666	92.1362	80.0301	99.0129	56.2557	96.496	63.2729	6.39194	7.23203	7.46786	5.37705	5.93524	5.3877
A_55_P1966644	0.815458	0.8714	1.03633	up	NM_013838	chr9:8680682-8680741	Trpc6	Mus musculus transient receptor potential cation channel, subfamily C, member 6 (Trpc6), transcript variant 1, mRNA [NM_013838]	GO:0005515|GO:0005262|GO:0070301|GO:0005261|GO:0005886|GO:0051928|GO:0032414|GO:0055085|GO:0007204|GO:0070679|GO:0016020|GO:0005887|GO:0036057|GO:0070588|GO:0006810|GO:0006816|GO:0015279|GO:0016021|GO:0005216|GO:0006811	NM_013838	Mm.325086	22068	19.4466	39.5302	4.78171	4.73023	25.9844	12.7048	19.6506	34.2791	40.5134	43.7983	4.51702	4.66001	5.16809	4.67074	4.66915	4.8508
A_51_P414448	0.221107	0.355729	1.24447	up	NM_053089	chr3:51277661-51277719	Naa15	Mus musculus N(alpha)-acetyltransferase 15, NatA auxiliary subunit (Naa15), mRNA [NM_053089]	GO:0005515|GO:0031415|GO:0005667|GO:0043066|GO:0006355|GO:0008080|GO:0050821|GO:0005634|GO:0007275|GO:0001525|GO:0006351|GO:0030154|GO:0005737|GO:0043022|GO:0016407|GO:0045893|GO:0006474	NM_053089	Mm.275281	74838	1008.72	1494.33	10.4033	10.0878	1147.08	1094.23	784.84	1433.14	1531.87	1517.97	10.0359	10.785	10.3891	10.0945	10.0405	10.1283
A_52_P488305	0.0388153	0.129762	1.51648	up	NM_023668	chr11:68646905-68643559	Ndel1	Mus musculus nuclear distribution gene E-like homolog 1 (A. nidulans) (Ndel1), mRNA [NM_023668]	GO:0005515|GO:0008017|GO:0030424|GO:0008090|GO:0007100|GO:0001833|GO:0045773|GO:0005635|GO:0032403|GO:0031175|GO:0030154|GO:0051642|GO:0005737|GO:0007059|GO:0048680|GO:0047496|GO:0021799|GO:0043203|GO:0006508|GO:0006810|GO:0005856|GO:0060070|GO:0031252|GO:0060053|GO:0060052|GO:0005813|GO:0005871|GO:0005815|GO:0043014|GO:0005694|GO:0005875|GO:0021955|GO:0005874|GO:0048487|GO:0005730|GO:0000226|GO:…	NM_023668	Mm.31979	83431	209.132	292.077	8.21082	7.61009	273.236	183.959	170.202	218.531	372.932	284.769	7.99829	8.38559	8.24858	7.33872	7.90131	7.59025
A_51_P110471	0.347543	0.481638	1.17537	up	NM_026993	chr3:145516152-145516211	Ddah1	Mus musculus dimethylarginine dimethylaminohydrolase 1 (Ddah1), mRNA [NM_026993]	GO:0016813|GO:0046872|GO:0045766|GO:0006809|GO:0045429|GO:0003073|GO:0005739|GO:0005737|GO:0016787|GO:0006525|GO:0000052|GO:0008270|GO:0017014|GO:0016597|GO:0016403|GO:0070062	NM_026993	Mm.234247	69219	9.98391	16.898	3.74332	3.5102	15.7645	8.65286	5.53436	16.527	18.4171	15.7499	3.75937	4.09466	3.37593	3.61079	3.54504	3.37478
A_65_P10450	0.786853	0.850978	1.08457	up	NM_011605	chr10:90623781-90623722	Tmpo	Mus musculus thymopoietin (Tmpo), transcript variant 1, mRNA [NM_011605]	GO:0005515|GO:0031965|GO:0006355|GO:0016020|GO:0005694|GO:0005637|GO:0005634|GO:0016021|GO:0005635|GO:0003677|GO:0000785	NM_011605	Mm.159684	21917	289.78	550.694	8.67356	8.55644	268.051	352.622	248.666	453.25	696.823	502.01	7.9674	9.26501	8.78826	8.38784	8.84114	8.44034
A_52_P660385	0.0438884	0.138181	1.43543	up	NM_175113	chr2:132630216-132630157	Trmt6	Mus musculus tRNA methyltransferase 6 (Trmt6), mRNA [NM_175113]	GO:0006446|GO:0003743|GO:0005634|GO:0005575|GO:0008033|GO:0006413	NM_175113	Mm.34199	66926	733.068	942.16	9.91242	9.39094	996.213	725.749	477.243	815.933	1016.85	993.694	9.83417	10.2308	9.67234	9.25996	9.42121	9.49165
A_55_P2139072	0.0325941	0.118246	1.23324	up		chr18:063234242-063234183							27.5421	46.3329	5.25456	4.9521	42.369	20.0931	20.1643	39.3858	55.4796	44.1333	5.24787	5.30725	5.20856	4.86353	5.13161	4.86116
A_55_P2090996	0.720586	0.801147	1.06938	up	NM_026932	chr4:118298510-118298569	Ebna1bp2	Mus musculus EBNA1 binding protein 2 (Ebna1bp2), mRNA [NM_026932]	GO:0007059|GO:0042254|GO:0006364|GO:0005730|GO:0005634	NM_026932	Mm.29906	69072	3250.92	5136.32	12.02	11.9233	3743.7	3722.52	2286.55	5524.27	5339.79	4544.92	11.7085	12.4856	11.866	12.079	11.9063	11.7845
A_55_P2008735	0.00435218	0.0475096	1.43294	up	XM_006497566	chr2:5731059-5731000	Cdc123	cell division cycle 123 [Source:MGI Symbol;Acc:MGI:2138811] [ENSMUST00000128467]	GO:0003674|GO:0007049|GO:0005737|GO:0051301	XM_006497566	Mm.181490	98828	65.4983	94.7955	6.52481	6.00583	94.4052	51.9117	50.1778	92.8862	103.719	87.7811	6.42661	6.6217	6.52613	6.10671	6.03752	5.87327
A_51_P252784	0.208711	0.342178	1.44366	up	NM_026883	chr5:122814682-122814623	Fam216a	Mus musculus family with sequence similarity 216, member A (Fam216a), mRNA [NM_026883]	GO:0008150|GO:0003674|GO:0005575	NM_026883	Mm.474469	68948	393.64	556.747	9.11131	8.58158	392.581	408.132	380.206	512.594	479.316	678.331	8.50561	9.4591	9.36922	8.56837	8.27466	8.9017
A_55_P2002460	0.0162352	0.08307	3.01554	up		chr13:012794813-012794872							28.5295	20.3959	5.37931	3.7869	28.1687	32.4308	24.9889	19.292	22.8652	19.0304	4.63548	5.97616	5.5263	3.83938	3.85914	3.66218
A_55_P2027747	0.000169903	0.0209641	2.54954	up	NM_029660	chr7:114354371-114354430	Rbmxl2	Mus musculus RNA binding motif protein, X-linked-like 2 (Rbmxl2), mRNA [NM_029660]	GO:0008150|GO:0003674	NM_029660	Mm.128134	76572	40.0956	33.0475	5.81656	4.46632	58.2925	29.9103	32.0842	26.7842	35.6248	36.7336	5.71453	5.86241	5.87274	4.31183	4.48116	4.60597
A_52_P244506	0.228108	0.36299	3.32703	up	XR_376820	chr5:37680788-37680729	Evc	PREDICTED: Mus musculus Ellis van Creveld gene syndrome (Evc), transcript variant X3, misc_RNA [XR_376820]	GO:0005515|GO:0045880|GO:0005929|GO:0005737|GO:0003416|GO:0016020|GO:0005886|GO:0042995|GO:0016021|GO:0005856|GO:0036064|GO:0007224	XR_376820	Mm.23592	59056	32.0374	17.1049	5.17359	3.43936	7.30003	56.2882	32.5239	8.39315	27.0966	15.825	2.89739	6.73321	5.89018	2.83877	4.0981	3.3812
A_55_P2061036	0.00650841	0.0558355	2.0445	up	XR_391366	chr7:52980170-52980229	Fam83e	family with sequence similarity 83, member E [Source:MGI Symbol;Acc:MGI:1921063] [ENSMUST00000156689]	GO:0008150|GO:0003674|GO:0005575	XR_391366	Mm.322591	73813	714.52	621.726	9.79423	8.76248	1212.55	490.504	440.508	672.439	592.285	600.453	10.116	9.70083	9.56582	8.97179	8.60361	8.71204
A_51_P413461	0.00649059	0.0557981	1.29966	up	NM_011960	chr14:33110162-33110221	Parg	Mus musculus poly (ADP-ribose) glycohydrolase (Parg), mRNA [NM_011960]	GO:0005975|GO:0004649|GO:0005634|GO:0045739|GO:0006974|GO:0005829|GO:0043231|GO:0016787|GO:0003682|GO:0016798|GO:0008152|GO:0000785|GO:0016045	NM_011960	Mm.15962	26430	642.495	911.956	9.72349	9.34535	936.158	541.673	449.656	892.846	949	894.023	9.7441	9.83034	9.59603	9.39335	9.3138	9.3289
A_55_P2117731	0.21722	0.351594	1.59671	up	NM_027470	chr7:29344370-29344311	Pak4	Mus musculus p21 protein (Cdc42/Rac)-activated kinase 4 (Pak4), mRNA [NM_027470]	GO:0023014|GO:0006950|GO:0006915|GO:0005524|GO:0035556|GO:0016310|GO:0005737|GO:0007049|GO:0004672|GO:0000166|GO:0004702|GO:0004674|GO:0016301|GO:0006468|GO:0016740|GO:0016772	NM_027470	Mm.21876	70584	7163.18	8037.69	13.187	12.5119	7043.48	5879.29	8566.77	5200.58	7660.94	11251.5	12.6258	13.1628	13.7725	11.9843	12.4587	13.0929
A_52_P38627	0.974547	0.98331	1.01696	up	NM_010113	chr3:129380885-129380826	Egf	Mus musculus epidermal growth factor (Egf), mRNA [NM_010113]	GO:0005515|GO:0008284|GO:0005154|GO:0005886|GO:0051048|GO:0050730|GO:0007262|GO:0021940|GO:0005765|GO:0035413|GO:0005615|GO:2000008|GO:0005622|GO:0000186|GO:0007173|GO:0043406|GO:1900127|GO:0070371|GO:0070062|GO:0010800|GO:0090279|GO:0045741|GO:0005509|GO:0018108|GO:0045840|GO:0001525|GO:0051223|GO:2000060|GO:0016020|GO:0043388|GO:0090370|GO:0050708|GO:0048754|GO:0016021|GO:0045893|GO:0008083|GO:…	NM_010113	Mm.252481	13645	39.5977	97.3887	5.85468	5.83042	39.158	37.8853	41.7497	169.973	46.0264	76.1671	5.12964	6.18812	6.24628	6.97021	4.85698	5.66406
A_55_P2064074	0.0232492	0.0989671	2.29328	up	NM_001199677	chr5:135548883-135548824	Vps37d	Mus musculus vacuolar protein sorting 37D (yeast) (Vps37d), transcript variant 1, mRNA [NM_001199677]	GO:0003674|GO:0000813|GO:0016020|GO:0006810|GO:0015031|GO:0070062|GO:0005768	NM_001199677	Mm.44356	194309	426.791	375.235	9.2054	8.00799	439.399	336.232	504.742	387.755	341.205	396.744	8.66571	9.2005	9.74999	8.16138	7.7739	8.08869
A_52_P276525	0.00606171	0.0544028	2.54277	up	NM_175207	chr12:112214819-112214760	Ankrd9	Mus musculus ankyrin repeat domain 9 (Ankrd9), mRNA [NM_175207]	GO:0008150|GO:0003674|GO:0016787|GO:0005575	NM_175207	Mm.250989	74251	1578.63	1156.84	11.0486	9.70223	1682.94	1748.21	1304.74	1034.68	1257.27	1178.58	10.591	11.4511	11.1037	9.61366	9.73991	9.75311
A_55_P2048499	0.0678482	0.177552	1.0917	up	XM_006523123	chr16:89151421-89151480		predicted gene 10061 [Source:MGI Symbol;Acc:MGI:3642175] [ENSMUST00000073111]		XM_006523123			33.0575	62.1715	5.50999	5.38342	51.7657	22.1825	25.2243	55.8513	70.1022	60.5611	5.53942	5.45209	5.53846	5.36659	5.46293	5.32072
A_52_P595954	0.2845	0.4202	1.29294	up	NM_011914	chr5:34240890-34240831	Nelfa	Mus musculus negative elongation factor complex member A, Whsc2 (Nelfa), mRNA [NM_011914]	GO:0006355|GO:0005737|GO:0032021|GO:0003682|GO:0005634|GO:0034244|GO:0006351	NM_011914	Mm.332320	24116	1000.56	1446.13	10.4075	10.0368	1001.83	1103.69	896.179	1536.17	1424.66	1377.55	9.84338	10.7992	10.5798	10.1942	9.92547	9.99074
A_55_P1982186	0.224143	0.358933	1.39521	up	NM_172718	chr5:113672308-113672249	Sgsm1	Mus musculus small G protein signaling modulator 1 (Sgsm1), transcript variant 1, mRNA [NM_172718]	GO:0032313|GO:0005794|GO:0005097	NM_172718	Mm.200203	52850	160.678	237.398	7.76931	7.28882	250.458	122.166	109.409	320.139	228.674	163.382	7.86607	7.82522	7.61663	7.89284	7.19653	6.7771
A_55_P2183770	0.318348	0.453221	1.60332	up	NM_029418	chr15:57860483-57860424	9130401M01Rik	Mus musculus RIKEN cDNA 9130401M01 gene (9130401M01Rik), mRNA [NM_029418]	GO:0008150|GO:0003674|GO:0005575	NM_029418	Mm.455792	75758	39.5389	51.9592	5.80118	5.12012	28.3474	51.4192	38.8501	45.8923	60.3762	49.6091	4.64413	6.61278	6.14663	5.08096	5.25538	5.02402
A_55_P2105838	0.0140923	0.0769597	3.46466	up		chr9:012613411-012613470							20.1701	7.63648	4.44766	2.65495	43.3634	8.04904	9.09787	8.40103	6.89146	7.61696	5.28547	3.98699	4.07053	2.83987	2.51708	2.6079
A_55_P2076680	0.466622	0.590362	1.98057	up	NM_010400		H60a	Mus musculus histocompatibility 60a (H60a), mRNA [NM_010400]	GO:0032729|GO:0071407|GO:0002839|GO:0030101|GO:0043032|GO:0005887|GO:0046703|GO:0042271|GO:0016021|GO:0009897|GO:0045429|GO:0032816	NM_010400	Mm.387042	15101	179.784	187.143	7.69489	6.70897	52.8902	221.858	264.604	87.6064	115.667	358.157	5.57384	8.63635	8.87448	6.01501	6.18121	7.9307
A_55_P2014144	0.918782	0.945935	1.01023	up	NM_146566	chr9:18680661-18680720	Olfr830	Mus musculus olfactory receptor 830 (Olfr830), mRNA [NM_146566]	GO:0050911|GO:0007608|GO:0007165|GO:0004984|GO:0016020|GO:0007186|GO:0005886|GO:0004930|GO:0016021|GO:0004871|GO:0050896	NM_146566	Mm.377568	258559	7.25316	15.6396	3.40889	3.3942	9.83902	6.0448	5.87567	15.2137	16.7913	14.9139	3.1699	3.59124	3.46552	3.47786	3.40581	3.29893
A_55_P2103055	0.599032	0.703027	1.16755	up	NM_010344	chr8:34808413-34808472	Gsr	Mus musculus glutathione reductase (Gsr), mRNA [NM_010344]	GO:0050661|GO:0016668|GO:0050660|GO:0006749|GO:0007283|GO:0004362|GO:0042803|GO:0005829|GO:0005739|GO:0005737|GO:0043295|GO:0016491|GO:0045454|GO:0009897|GO:0070062|GO:0055114	NM_010344	Mm.283573	14782	5052.69	6552.5	12.4579	12.2345	9078.39	3582.37	2497.3	8931.95	5175.84	5549.71	12.97	12.4245	11.9794	12.755	11.8673	12.0811
A_52_P182659	0.0767389	0.190632	1.34668	up	NM_026444	chr10:127799428-127799487	Cs	Mus musculus citrate synthase (Cs), mRNA [NM_026444]	GO:0006099|GO:0044262|GO:0005975|GO:0046912|GO:0006107|GO:0005634|GO:0006084|GO:0005739|GO:0006101|GO:0005759|GO:0004108|GO:0016740|GO:0070062	NM_026444	Mm.58836	12974	39337	53288	15.7162	15.2868	50360.9	35130.3	32519.7	55384.9	55190.3	49289	15.3697	15.9212	15.8577	15.3397	15.3329	15.1878
A_55_P2042126	0.244245	0.380038	1.22524	up		chr13:067552666-067552607							24.5513	38.5794	4.98894	4.69587	43.3996	12.502	17.7523	36.8843	45.1593	33.6946	5.28687	4.64077	5.03918	4.77194	4.82481	4.49087
A_55_P2178748	0.0871574	0.204534	1.87154	up	AK038780	chr3:96881280-96881339	Gja5	Mus musculus adult male hypothalamus cDNA, RIKEN full-length enriched library, clone:A230062H11 product:gap junction membrane channel protein alpha 5, full insert sequence. [AK038780]	GO:0030054|GO:0003283|GO:0003284|GO:0003281|GO:0048844|GO:0042995|GO:0060307|GO:0051259|GO:0086075|GO:0086067|GO:0060371|GO:0086069|GO:0060373|GO:0061337|GO:0071253|GO:0086005|GO:0003174|GO:0086064|GO:0086065|GO:0003073|GO:0001501|GO:0003071|GO:0005887|GO:0055117|GO:0086014|GO:0005921|GO:0005922|GO:0010652|GO:0086015|GO:0035922|GO:0086053|GO:0003161|GO:0005886|GO:0055077|GO:0016264|GO:0030326|GO:…		Mm.281816	14613	159.549	179.46	7.83615	6.93192	144.555	144.899	189.193	170.231	192.371	175.779	7.06261	8.04588	8.39997	6.97267	6.94304	6.88006
A_55_P2139390	0.362486	0.495888	1.31661	up		chr12:048914099-048914158							4426.85	5746.44	12.4973	12.1005	3797.53	4870.51	4612.49	5398.86	6064.33	5776.13	11.727	12.8831	12.8819	12.0396	12.1208	12.1411
A_55_P2015258	0.00748998	0.0589199	2.46829	up	NM_001164220	chr14:62224545-62224604	Trim13	Mus musculus tripartite motif-containing 13 (Trim13), transcript variant 1, mRNA [NM_001164220]	GO:0004842|GO:0005783|GO:0016874|GO:0032897|GO:0030433|GO:0097038|GO:0046872|GO:0051865|GO:0005622|GO:0007165|GO:0005737|GO:0051092|GO:0016020|GO:0045087|GO:0005789|GO:0043161|GO:0008270|GO:0004871|GO:0016021|GO:0043123|GO:0010942|GO:0016239	NM_001164220	Mm.491258	66597	266.655	216.651	8.4713	7.16779	409.255	228.27	162.439	148.464	229.679	271.81	8.56227	8.67634	8.17528	6.78473	7.20162	7.51701
A_52_P219913	0.136016	0.263018	1.56616	up	NM_026891	chr2:120544949-120544890	Cdan1	Mus musculus congenital dyserythropoietic anemia, type I (human) (Cdan1), mRNA [NM_026891]	GO:0003674|GO:0005737|GO:0031497|GO:0005886|GO:0006998|GO:0005634|GO:0008156	NM_026891	Mm.2289	68968	74.8548	103.58	6.76352	6.11629	77.7027	64.9515	81.9103	95.2153	128.544	86.9794	6.14932	6.92877	7.21249	6.1422	6.34571	5.86096
A_55_P2082914	0.570936	0.680342	1.29468	up	NM_134037	chr11:100365577-100365518	Acly	Mus musculus ATP citrate lyase (Acly), transcript variant 2, mRNA [NM_134037]	GO:0006629|GO:0005515|GO:0048037|GO:0008610|GO:0044262|GO:0005886|GO:0046912|GO:0003878|GO:0005634|GO:0003824|GO:0006085|GO:0005524|GO:0006084|GO:0046872|GO:0005622|GO:0005739|GO:0006101|GO:0005737|GO:0000166|GO:0008152|GO:0006633|GO:0004775|GO:0016740|GO:0070062	NM_134037	Mm.282039	104112	9.80193	17.1131	3.89734	3.52474	6.23257	10.6912	12.4821	20.3287	15.4611	15.5495	2.75779	4.41306	4.52117	3.92177	3.29753	3.35492
A_66_P119999	0.691585	0.778593	1.07631	up	NM_001253717	chr6:114809893-114809952	Atg7	Mus musculus autophagy related 7 (Atg7), transcript variant 1, mRNA [NM_001253717]	GO:0005515|GO:0021987|GO:0003824|GO:0009791|GO:0015031|GO:0021860|GO:0042803|GO:0031175|GO:0031401|GO:0030163|GO:0005737|GO:0042594|GO:0021680|GO:0007628|GO:0006810|GO:0006497|GO:0061024|GO:0031396|GO:0016239|GO:0006520|GO:0043066|GO:0006996|GO:0005930|GO:0021955|GO:0006914|GO:0004839|GO:0032446|GO:0001889|GO:0019778|GO:0050877|GO:0055013|GO:0007005	NM_001253717	Mm.275332	74244	1001.61	1739.07	10.4173	10.3112	1062.82	983.833	958.174	1614.32	1759.44	1843.45	9.93185	10.638	10.6819	10.2659	10.2517	10.416
A_55_P1964615	0.0138603	0.0765899	1.73025	up	NM_133763	chr2:164572217-164572276	Dnttip1	Mus musculus deoxynucleotidyltransferase, terminal, interacting protein 1 (Dnttip1), mRNA [NM_133763]	GO:0005634|GO:0043085|GO:0008047|GO:0003677|GO:0042803|GO:0016740	NM_133763	Mm.440009	76233	98.731	121.547	7.14729	6.3563	122.537	82.2555	91.4006	100.253	142.002	122.387	6.80979	7.27166	7.36041	6.21933	6.50021	6.34938
A_55_P2070262	0.462065	0.586359	1.30613	up	AK155210	chr9:108553135-108553194		predicted gene 10621 [Source:MGI Symbol;Acc:MGI:3642291] [ENSMUST00000098384]			Mm.290447		9.42391	16.3115	3.84713	3.46184	7.6605	11.2054	9.40588	17.011	16.7842	15.1392	2.94423	4.47931	4.11786	3.65759	3.40532	3.3226
A_52_P468033	0.219617	0.354036	1.22298	up	NM_001040398	chr5:123617294-123617353	Setd1b	Mus musculus SET domain containing 1B (Setd1b), mRNA [NM_001040398]	GO:0006355|GO:0005694|GO:0003723|GO:0008168|GO:0005634|GO:0003676|GO:0032259|GO:0006351|GO:0018024|GO:0003674|GO:0000166|GO:0016740|GO:0016568	NM_001040398	Mm.250391	208043	820.766	1214.83	10.067	9.77661	1170.14	517.705	774.458	1153.76	1148.31	1342.44	10.0618	9.76883	10.3704	9.7801	9.60407	9.94567
A_55_P2088095	0.616149	0.716588	1.04177	up		chr17:035542095-035542154							1948.78	3331.71	11.3269	11.2678	2520.46	1778.02	1547.85	3019.5	3760.97	3214.67	11.1628	11.4714	11.3464	11.1686	11.3808	11.2541
A_55_P2129488	0.0417093	0.134709	3.72506	up	NM_001039501	chr2:164482798-164482857	Wfdc10	Mus musculus WAP four-disulfide core domain 10 (Wfdc10), mRNA [NM_001039501]	GO:0008150|GO:0003674|GO:0005575	NM_001039501	Mm.189007	629756	209.739	83.8281	7.64546	5.7482	482.037	82.2455	64.9336	60.2119	124.269	67.0033	8.78554	7.27134	6.87951	5.47708	6.29279	5.47474
A_66_P115061	0.0590322	0.163877	1.64314	up	NM_025695	chr12:11326452-11326511	Smc6	Mus musculus structural maintenance of chromosomes 6 (Smc6), mRNA [NM_025695]	GO:0000781|GO:0005694|GO:0030915|GO:0005730|GO:0005634|GO:0006310|GO:0005524|GO:0006974|GO:0005622|GO:0003674|GO:0006281|GO:0000166|GO:0000724|GO:0016605|GO:0000722|GO:0090398	NM_025695	Mm.173953	67241	794.039	923.362	10.0628	9.34636	910.018	842.499	629.601	700.338	985.543	1084.21	9.70016	10.4367	10.0515	9.03609	9.3709	9.63208
A_55_P2117664	0.200218	0.33318	1.37118	up	NM_001164504	chr18:77700553-77700494	Rnf165	Mus musculus ring finger protein 165 (Rnf165), mRNA [NM_001164504]	GO:0000209|GO:0005515|GO:0035136|GO:0004842|GO:0005634|GO:0010259|GO:0007409|GO:0061061|GO:0060384|GO:0030163|GO:0030513|GO:0043234|GO:0008045|GO:0060173	NM_001164504	Mm.23293	225743	329.414	493.8	8.86857	8.41316	335.614	300.946	351.681	448.245	507.301	525.854	8.29456	9.05143	9.25972	8.37201	8.35772	8.50973
A_55_P2072213	0.599814	0.703622	1.13426	up		chr12:089574069-089574128							1484.56	2426.81	10.9642	10.7824	1523.37	1582.43	1347.87	2940.92	2205.86	2133.65	10.4389	11.3053	11.1484	11.132	10.5699	10.6454
A_55_P2339650	0.00275719	0.0406365	1.84331	up	NM_177301	chr7:29605608-29605667	Hnrnpl	Mus musculus heterogeneous nuclear ribonucleoprotein L (Hnrnpl), mRNA [NM_177301]	GO:0006397|GO:0005737|GO:0044212|GO:0000166|GO:0030529|GO:0003723|GO:0005634|GO:0045120|GO:0003676|GO:0070062	NM_177301	Mm.9043	15388	81.4109	92.6962	6.8566	5.9743	106.507	69.0831	68.6421	86.7755	96.0985	95.2145	6.59494	7.01692	6.95794	6.00376	5.92762	5.99153
A_55_P1977633	0.111601	0.233909	1.54336	up	NM_145836	chr12:88221727-88221668	Irf2bpl	Mus musculus interferon regulatory factor 2 binding protein-like (Irf2bpl), mRNA [NM_145836]	GO:0003674|GO:0046543|GO:0045944|GO:0005634|GO:0000122|GO:0005615|GO:0046872	NM_145836	Mm.248358	238330	740.915	919.474	9.97847	9.35239	772.436	618.485	831.824	794.43	957.81	1006.18	9.45091	10.0124	10.4721	9.21755	9.32608	9.51355
A_55_P1956667	0.303921	0.438647	1.16157	up	NM_001164661	chr7:63185989-63186048	Cyfip1	Mus musculus cytoplasmic FMR1 interacting protein 1 (Cyfip1), transcript variant 1, mRNA [NM_001164661]	GO:0005515|GO:0043005|GO:0031209|GO:0048471|GO:0030054|GO:0008360|GO:0030032|GO:0045202|GO:0048675|GO:0003779|GO:0007275|GO:0042995|GO:0032403|GO:0030027|GO:0030154|GO:0007399|GO:0048365|GO:0005737|GO:0016601|GO:0050890|GO:2000601|GO:0005522|GO:0005845|GO:0070062	NM_001164661	Mm.37249	20430	373.523	643.237	9.02699	8.81091	449.105	362.709	308.755	571.951	716.861	640.899	8.69445	9.3034	9.08314	8.73507	8.8872	8.81048
A_55_P2083879	0.225212	0.360091	3.77591	up	NM_020518	chr9:37351727-37351786	Vsig2	Mus musculus V-set and immunoglobulin domain containing 2 (Vsig2), mRNA [NM_020518]	GO:0008150|GO:0003674|GO:0016020|GO:0005887|GO:0016021	NM_020518	Mm.27478	57276	770.977	148.923	8.4639	6.54708	2144.68	63.4677	104.784	237.013	95.6606	114.095	10.9406	6.89589	7.55517	7.46468	5.91836	6.25819
A_55_P1964613	0.0193798	0.0906332	1.50161	up	AK168315	chr2:164576735-164576794	Dnttip1	Mus musculus TIB-55 BB88 cDNA, RIKEN full-length enriched library, clone:I730090C17 product:deoxynucleotidyltransferase, terminal, interacting protein 1, full insert sequence. [AK168315]	GO:0005634|GO:0043085|GO:0008047|GO:0003677|GO:0042803|GO:0016740		Mm.440009	76233	63.5091	90.4085	6.50104	5.91453	86.2879	51.5634	52.6762	70.0065	107.575	93.6437	6.2972	6.61431	6.5916	5.69178	6.08583	5.96598
A_55_P2060707	0.0198353	0.0915924	1.93014	up	NM_133836	chr2:11655416-11655475	Il15ra	Mus musculus interleukin 15 receptor, alpha chain (Il15ra), transcript variant 2, mRNA [NM_133836]	GO:0005622|GO:0016020|GO:0005886|GO:0010977|GO:0005634|GO:0005576|GO:0032825|GO:0031410|GO:0016021|GO:0007259	NM_133836	Mm.200196	16169	1608.63	1552.41	11.0674	10.1187	1924.11	1552.05	1349.71	1182.94	1520.56	1953.73	10.7755	11.2751	11.1518	9.8202	10.0298	10.5063
A_51_P324814	0.0200991	0.0920855	1.29727	up	NM_010664	chr15:101862341-101862400	Krt18	Mus musculus keratin 18 (Krt18), mRNA [NM_010664]	GO:0005515|GO:0005882|GO:0043066|GO:0005815|GO:0034451|GO:0097284|GO:0005634|GO:0097191|GO:0033209|GO:0071944|GO:0005737|GO:0005198|GO:0097110|GO:0045095|GO:0043000|GO:0070062	NM_010664	Mm.22479	16668	8928.86	11004.9	13.4117	13.0362	13727	7154.08	5905.48	11274.9	10927	10812.9	13.5647	13.4364	13.2341	13.0861	12.9874	13.0352
A_55_P2157360	0.654216	0.747218	1.16161	up	NM_147155	chr17:7159919-7159860	Tagap1	Mus musculus T cell activation GTPase activating protein 1 (Tagap1), mRNA [NM_147155]	GO:0008150|GO:0003674|GO:0005575	NM_147155	Mm.371734	380608	177.325	324.454	7.98952	7.7734	154.226	186.806	190.945	236.411	374.114	362.837	7.15164	8.4034	8.41352	7.46117	7.90722	7.9518
A_55_P2098071	0.123323	0.248011	1.22323	up	NM_009546	chr11:88881521-88881580	Trim25	Mus musculus tripartite motif-containing 25 (Trim25), mRNA [NM_009546]	GO:0004842|GO:0016874|GO:0005634|GO:0046872|GO:0051607|GO:0005737|GO:0051091|GO:0051092|GO:0046596|GO:0046597|GO:0045087|GO:0008270|GO:0043123|GO:0002376	NM_009546	Mm.248445	217069	7385.93	10341.2	13.2338	12.9431	8976.93	6519.97	6660.88	10759.3	10688.4	9575.8	12.9564	13.316	13.4289	13.0199	12.9436	12.8657
A_55_P1979305	0.23578	0.371253	1.46697	up	NM_028923	chr2:29814108-29814167	Gle1	Mus musculus GLE1 RNA export mediator (yeast) (Gle1), mRNA [NM_028923]	GO:0005737|GO:0005886|GO:0016973|GO:0005643|GO:0006810|GO:0005634|GO:0051028|GO:0015031|GO:0005615|GO:0042802	NM_028923	Mm.275121	74412	459.589	623.178	9.30466	8.75182	407.947	545.026	425.796	534.031	740.58	594.923	8.5567	9.84038	9.51689	8.62782	8.93464	8.693
A_55_P2117164	0.00424995	0.0471226	1.46022	up	NM_027992	chr6:13037120-13037179	Tmem106b	Mus musculus transmembrane protein 106B (Tmem106b), mRNA [NM_027992]	GO:0032418|GO:0048813|GO:0003674|GO:0016020|GO:0006810|GO:0016021|GO:0005765|GO:0005764|GO:0005768	NM_027992	Mm.27742	71900	826.03	1009.78	10.0458	9.49966	1285.08	572.191	620.819	913.373	1106.13	1009.83	10.2001	9.90749	10.03	9.42476	9.55509	9.51911
A_51_P308254	0.00440842	0.0477056	1.48658	up	NM_013678	chr2:26774863-26775290	Surf2	Mus musculus surfeit gene 2 (Surf2), mRNA [NM_013678]	GO:0008150|GO:0003674|GO:0005886|GO:0005730|GO:0005634	NM_013678	Mm.389260	20931	235.682	326.021	8.37649	7.8045	313.688	184.54	208.819	303.364	355.42	319.279	8.20218	8.3908	8.53649	7.81761	7.82963	7.76625
A_55_P2425190	0.29135	0.426672	1.36597	up	NM_001163610	chrX:99281459-99281518	Nhsl2	Mus musculus NHS-like 2 (Nhsl2), mRNA [NM_001163610]	GO:0008150|GO:0003674|GO:0005575	NM_001163610	Mm.232	100042480	36.0483	58.3245	5.71801	5.26808	37.1785	30.9306	40.0356	42.7008	68.4861	63.7865	5.0559	5.90889	6.18924	4.97795	5.42562	5.40068
A_51_P104125	0.0301258	0.113034	2.05126	up	NM_176836	chr9:13650658-13650717	Fam76b	Mus musculus family with sequence similarity 76, member B (Fam76b), mRNA [NM_176836]	GO:0008150|GO:0003674|GO:0031965|GO:0005634	NM_176836	Mm.246174	72826	628.807	605.123	9.74981	8.7133	629.606	629.387	627.428	501.778	615.999	697.593	9.16885	10.0359	10.0447	8.53381	8.66205	8.94404
A_66_P102260	0.0324901	0.118082	4.31163	up	NM_001081212	chr8:11004549-11004490	Irs2	Mus musculus insulin receptor substrate 2 (Irs2), mRNA [NM_001081212]	GO:0008286|GO:0005515|GO:0008284|GO:0005886|GO:0008283|GO:0030890|GO:0005158|GO:0030879|GO:0005829|GO:0010907|GO:0071889|GO:0005737|GO:0046326|GO:0002903|GO:0032024|GO:0004871|GO:0033673|GO:0032869|GO:0030335|GO:0045725|GO:0019901|GO:0019903|GO:0019904|GO:0010748|GO:0002053|GO:0009749|GO:0007165|GO:0007420|GO:0032000|GO:0043548	NM_001081212	Mm.407207	384783	6687.24	2792.64	13.0458	10.9375	4430.98	6704.14	8926.6	1624.62	3243.8	3509.51	11.9565	13.3502	13.8306	10.2744	11.1501	11.3881
A_55_P1983468	0.0220529	0.0963506	2.34438	up	NM_009805	chr1:58789994-58790053	Cflar	Mus musculus CASP8 and FADD-like apoptosis regulator (Cflar), transcript variant 2, mRNA [NM_009805]	GO:2001237|GO:0043066|GO:0046982|GO:0031265|GO:0031264|GO:0006915|GO:0002020|GO:0043085|GO:0004197|GO:0016504|GO:0010952|GO:0005737|GO:0035877|GO:0006508|GO:0060544|GO:0043154|GO:0008047|GO:0060546	NM_009805	Mm.336848	12633	754.499	627.831	9.99727	8.76807	725.44	862.14	675.915	519.862	695.614	668.017	9.3709	10.4673	10.1537	8.59007	8.83794	8.87619
A_51_P172573	0.104298	0.22581	1.29443	up	NM_013671	chr17:13208074-13208133	Sod2	Mus musculus superoxide dismutase 2, mitochondrial (Sod2), mRNA [NM_013671]	GO:0005515|GO:0042645|GO:0042542|GO:0045599|GO:0007605|GO:0006801|GO:0006749|GO:0009791|GO:0048678|GO:0042802|GO:0007507|GO:0005622|GO:0043524|GO:0008637|GO:0019430|GO:0031667|GO:0051260|GO:0006979|GO:0010332|GO:0042743|GO:0001315|GO:0004784|GO:0001889|GO:0003032|GO:0055093|GO:0016491|GO:0000303|GO:0007005|GO:0000302|GO:0032364|GO:0001306|GO:0055114|GO:0008285|GO:0048773|GO:0048147|GO:0005743|GO:…	NM_013671	Mm.290876	20656	5823.12	7058.42	12.7598	12.3875	9554.63	4189.84	3724.89	6621.74	8374.78	6178.74	13.0456	12.6656	12.5683	12.3298	12.5857	12.247
A_52_P819156	0.0575622	0.161466	1.66245	up	AK046412	chr4:98963069-98963128	Gm12689	predicted gene 12689 [Source:MGI Symbol;Acc:MGI:3650433] [ENSMUST00000094955]	GO:0008150|GO:0003674|GO:0005575		Mm.483670	100137011	47.37	59.2547	6.028	5.29469	67.3637	25.7814	48.9651	47.7536	74.6653	55.3451	5.93513	5.65981	6.48906	5.13976	5.55931	5.185
A_52_P355197	0.0116405	0.0706384	1.47117	up	NM_010269	chr3:99998514-100000486	Gdap2	Mus musculus ganglioside-induced differentiation-associated-protein 2 (Gdap2), transcript variant 1, mRNA [NM_010269]	GO:0003674|GO:0032526|GO:0005765	NM_010269	Mm.279228	14547	280.523	367.093	8.52861	7.97165	454.697	208.503	178.368	333.945	419.604	347.731	8.70728	8.56264	8.31593	7.95522	8.07254	7.88718
A_55_P2133125	0.536214	0.650807	1.25382	up	NM_172681	chr3:83713134-83713075	D930015E06Rik	Mus musculus RIKEN cDNA D930015E06 gene (D930015E06Rik), mRNA [NM_172681]	GO:0008150|GO:0003674|GO:0016020|GO:0016021|GO:0005575	NM_172681	Mm.28838	229473	34.6291	61.0976	5.65829	5.33195	31.1634	34.9395	37.7845	44.6529	58.9195	79.7206	4.78841	6.08043	6.10602	5.03719	5.22114	5.73753
A_51_P452875	0.633564	0.73035	1.08825	up	NM_001082532	chr9:21962728-21962787	Pigyl	Mus musculus phosphatidylinositol glycan anchor biosynthesis, class Y-like (Pigyl), mRNA [NM_001082532]	GO:0008150|GO:0003674|GO:0016020|GO:0005783|GO:0016021|GO:0005575|GO:0006506	NM_001082532	Mm.28924	66268	834.449	1295.55	9.98987	9.86787	1447.8	494.526	561.019	1442.32	1173.05	1271.28	10.3644	9.70883	9.89639	10.1034	9.63767	9.86257
A_51_P452682	0.441834	0.569075	1.16705	up	NM_029315	chr13:78165362-78165421	Pou5f2	Mus musculus POU domain class 5, transcription factor 2 (Pou5f2), mRNA [NM_029315]	GO:0043565|GO:0006355|GO:0003700|GO:0005634|GO:0005575|GO:0003677|GO:0006351	NM_029315	Mm.443255	75507	130.378	240.032	7.55565	7.33279	151.97	124.387	114.776	181.142	261.687	277.267	7.13188	7.85012	7.68495	7.05515	7.39696	7.54625
A_55_P2148478	0.678829	0.768311	1.09087	up	NM_029652	chr7:83018957-83019016	Klhl25	Mus musculus kelch-like 25 (Klhl25), transcript variant 1, mRNA [NM_029652]	GO:0003674|GO:0005737|GO:0016567|GO:0042787|GO:0006446|GO:0031463|GO:0006417	NM_029652	Mm.206223	207952	301.758	566.955	8.73022	8.60474	365.79	302.724	236.762	691.044	544.063	465.757	8.41278	9.06284	8.71503	9.01593	8.47049	8.32779
A_55_P1967533	0.314664	0.449716	1.17806	up	NR_003623	chr1:182257894-182257835	Gm5069	Mus musculus predicted pseudogene 5069 (Gm5069), non-coding RNA [NR_003623]		NR_003623	Mm.389223	277333	6808.09	9964.36	13.1188	12.8824	7890.45	6164.71	6369.1	9103.28	11942.1	8847.67	12.7855	13.2276	13.3435	12.7776	13.114	12.7557
A_55_P1984259	0.0498345	0.148722	3.13112	up	NR_110469	chr6:31115582-31115523	AB041803	Mus musculus cDNA sequence AB041803 (AB041803), transcript variant A, long non-coding RNA [NR_110469]	GO:0003674|GO:0035264|GO:0005575	NR_110469	Mm.443019	232685	142.147	96.5854	7.63913	5.99246	101.634	159.898	164.909	69.5331	95.8702	124.353	6.52613	8.19486	8.19642	5.68073	5.92285	6.37379
A_52_P300416	0.219599	0.354036	1.13842	up	NM_133761	chr14:31339843-31339902	Dcp1a	Mus musculus DCP1 decapping enzyme homolog A (S. cerevisiae) (Dcp1a), mRNA [NM_133761]	GO:0005667|GO:0005737|GO:0016787|GO:0000184|GO:0000932|GO:0007179|GO:0005634|GO:0045893|GO:0042802|GO:0008134	NM_133761	Mm.28733	75901	412.957	715.341	9.1531	8.96607	538.757	366.549	333.564	608.544	807.924	729.557	8.95026	9.31769	9.19135	8.8281	9.05758	9.01252
A_51_P233855	0.100099	0.220876	1.38133	up	NM_172750	chr8:13235855-13235796	Adprhl1	Mus musculus ADP-ribosylhydrolase like 1 (Adprhl1), mRNA [NM_172750]	GO:0008150|GO:0003674|GO:0003875|GO:0000287|GO:0016787|GO:0051725|GO:0005575	NM_172750	Mm.132785	234072	43.1523	66.9153	5.95725	5.49119	53.7354	32.0637	43.6577	61.1275	76.9851	62.6332	5.59502	5.95884	6.3179	5.49784	5.60113	5.37461
A_51_P425373	0.0156027	0.081419	1.68088	up	NM_028047	chr7:25207609-25207668	Smg9	Mus musculus smg-9 homolog, nonsense mediated mRNA decay factor (C. elegans) (Smg9), mRNA [NM_028047]	GO:0005622|GO:0000184|GO:0042802	NM_028047	Mm.150977	71997	587.308	678.704	9.64455	8.89533	692.935	587.976	481.014	642.227	719.516	674.368	9.30607	9.94499	9.6826	8.90143	8.89349	8.89108
A_52_P537381	0.141312	0.268867	1.50757	up	NM_025447	chr13:107747251-107748764	Dimt1	Mus musculus DIM1 dimethyladenosine transferase 1-like (S. cerevisiae) (Dimt1), mRNA [NM_025447]	GO:0003723|GO:0006364|GO:0008168|GO:0005730|GO:0005634|GO:0000154|GO:0032259|GO:0000179|GO:0016433|GO:0008649|GO:0005737|GO:0052909|GO:0016740	NM_025447	Mm.9563	66254	182.581	250.166	8.01474	7.42252	193.122	214.555	140.065	230.881	267.86	251.756	7.47745	8.59608	7.9707	7.42554	7.42944	7.41258
A_55_P2008427	0.257546	0.393518	1.36118	up	NM_173383	chr18:36923408-36923349	Dnd1	Mus musculus dead end homolog 1 (zebrafish) (Dnd1), mRNA [NM_173383]	GO:0005515|GO:0005737|GO:0000166|GO:0003723|GO:0060965|GO:0017091|GO:0007275|GO:0005634|GO:0003676|GO:0007281	NM_173383	Mm.234464	213236	164.402	211.798	7.60906	7.1642	322.637	83.2044	87.3653	200.012	251.92	183.462	8.24168	7.28999	7.29551	7.20791	7.34121	6.9435
A_55_P2147803	0.00923939	0.0637385	2.56473	up	NM_013591	chr10:79129132-79129191	Madcam1	Mus musculus mucosal vascular addressin cell adhesion molecule 1 (Madcam1), mRNA [NM_013591]	GO:0016020|GO:0030216|GO:0002687|GO:0016021|GO:0050900|GO:0007155	NM_013591	Mm.391556	17123	50.3256	43.3257	6.18544	4.82664	61.0248	47.8358	42.1163	30.4754	44.3258	55.1759	5.78679	6.50909	6.26045	4.50346	4.79665	5.1798
A_55_P2127265	0.139959	0.267376	1.31339	up		chr7:034188701-034188760							21262.2	28784.5	14.796	14.4027	24507.3	19660.9	19618.3	29702.1	30955.9	25695.5	14.3842	14.9854	15.0184	14.4525	14.4678	14.2879
A_55_P2018442	0.0679788	0.177728	1.76076	up	XR_380064	chr10:22426177-22426118	Tbpl1	PREDICTED: Mus musculus TATA box binding protein-like 1 (Tbpl1), transcript variant X3, misc_RNA [XR_380064]	GO:0005515|GO:0006352|GO:0001675|GO:0005737|GO:0007289|GO:0005672|GO:0005634|GO:0007283|GO:0006235|GO:0003677	XR_380064	Mm.86670	237336	23.5212	29.6629	5.0909	4.2747	28.4402	17.1948	24.9287	19.6905	38.4108	30.8874	4.64985	5.09957	5.52329	3.87287	4.58622	4.36502
A_51_P114616	0.160825	0.291143	1.68361	up	NM_016767	chr12:87049872-87049929	Batf	Mus musculus basic leucine zipper transcription factor, ATF-like (Batf), mRNA [NM_016767]	GO:0005515|GO:0002320|GO:0006355|GO:0003700|GO:0030330|GO:0072539|GO:0045190|GO:0042832|GO:0005634|GO:0060218|GO:0001816|GO:0003677|GO:0072540|GO:0006351|GO:0006974|GO:0030154|GO:0043565|GO:0005622|GO:0005737|GO:0045064|GO:0043011	NM_016767	Mm.6672	53314	148.237	187.586	7.73869	6.98713	130.179	159.212	155.321	185.447	164.698	212.614	6.9097	8.19073	8.11564	7.08827	6.71461	7.15851
A_55_P1999012	0.608426	0.710352	1.11214	up	AK080325	chr17:48197992-48198051		Mus musculus 3 days neonate thymus cDNA, RIKEN full-length enriched library, clone:A630054F02 product:unclassifiable, full insert sequence. [AK080325]			Mm.124005		12.515	20.9764	3.95759	3.80426	23.4281	6.50671	7.61028	21.5593	25.0323	16.3376	4.35701	3.69926	3.81651	4.00322	3.98076	3.42879
A_51_P315682	0.200037	0.333017	1.35222	up	NM_183029	chr16:22059319-22059260	Igf2bp2	Mus musculus insulin-like growth factor 2 mRNA binding protein 2 (Igf2bp2), mRNA [NM_183029]	GO:0048027|GO:0005737|GO:0000166|GO:0003723|GO:0006810|GO:0005634|GO:0051028|GO:0003730|GO:0005856|GO:0003729|GO:0003676|GO:0006417	NM_183029	Mm.489442	319765	884.647	1249.73	10.2373	9.80199	1008.08	793.434	852.433	1549.95	1106.67	1092.57	9.85243	10.3555	10.504	10.2076	9.55595	9.64239
A_51_P239203	0.0131672	0.0746585	2.02734	up	NM_011950	chr17:28915417-28915476	Mapk13	Mus musculus mitogen-activated protein kinase 13 (Mapk13), mRNA [NM_011950]	GO:0032755|GO:0006355|GO:0006950|GO:0006970|GO:0005524|GO:0006351|GO:0035556|GO:0005622|GO:0016310|GO:0007049|GO:0004672|GO:0018105|GO:0000166|GO:0016301|GO:0000165|GO:0004674|GO:0006468|GO:0016740|GO:0016772|GO:0004707	NM_011950	Mm.27970	26415	8293.7	7053.53	13.4046	12.385	8888.35	8487.11	7505.62	6425.72	7950.96	6783.89	12.9459	13.6803	13.5876	12.2819	12.506	12.3672
A_51_P392385	0.241905	0.37771	3.29279	up	NM_008574	chr3:92387941-92387882	Smcp	Mus musculus sperm mitochondria-associated cysteine-rich protein (Smcp), mRNA [NM_008574]	GO:0007338|GO:0005739|GO:0005737|GO:0016020|GO:0007341|GO:0005741|GO:0030317|GO:0007339	NM_008574	Mm.331192	17235	38.6594	21.1181	5.29845	3.57914	15.1261	84.9582	15.8938	5	22.8111	35.5433	3.69647	7.31561	4.88326	2.32438	3.8534	4.55963
A_55_P2169888	0.0299358	0.112546	2.00814	up	NM_172911	chr8:37210529-37210588	D8Ertd82e	Mus musculus DNA segment, Chr 8, ERATO Doi 82, expressed (D8Ertd82e), mRNA [NM_172911]	GO:0016310|GO:0003674|GO:0004672|GO:0000166|GO:0016301|GO:0006468|GO:0005575|GO:0004713|GO:0005524|GO:0004715|GO:0016740|GO:0016772	NM_172911	Mm.244971	244418	984.683	933.013	10.3423	9.33643	1172.72	1099.41	681.916	714.194	1253.59	831.253	10.0658	10.7909	10.1701	9.06186	9.7355	9.21192
A_52_P564413	0.0471026	0.144159	1.53652	up	NM_207683	chr6:139570930-139570989	Pik3c2g	Mus musculus phosphatidylinositol 3-kinase, C2 domain containing, gamma polypeptide (Pik3c2g), transcript variant 1, mRNA [NM_207683]	GO:0005794|GO:0005886|GO:0036092|GO:0048015|GO:0005635|GO:0005524|GO:0046854|GO:0016310|GO:0000166|GO:0006935|GO:0016020|GO:0016301|GO:0016303|GO:0016773|GO:0035005|GO:0035091|GO:0005942|GO:0016740|GO:0016772	NM_207683	Mm.333471	18705	37.4247	45.9936	5.57322	4.95355	68.3554	22.4991	21.4197	47.7062	46.3485	43.9261	5.95626	5.46897	5.29443	5.13838	4.86799	4.8543
A_55_P2066927	0.38027	0.512027	1.08961	up	AK088379	chr4:41705327-41705386	Galt	galactose-1-phosphate uridyl transferase [Source:MGI Symbol;Acc:MGI:95638] [ENSMUST00000108038]	GO:0005794|GO:0005975|GO:0008108|GO:0016779|GO:0006258|GO:0008270|GO:0006012|GO:0003824|GO:0046872|GO:0016740			14430	91.0988	172.474	6.99921	6.8754	126.403	64.0724	82.8207	163.952	190.201	163.267	6.85987	6.90932	7.22845	6.92404	6.92577	6.77639
A_55_P2314657	0.798953	0.859502	1.05105	up	NR_038172	chr12:70954599-70954658	4931403G20Rik	Mus musculus RIKEN cDNA 4931403G20 gene (4931403G20Rik), transcript variant 1, long non-coding RNA [NR_038172]	GO:0008150|GO:0003674|GO:0005575	NR_038172	Mm.440427	70934	11.6162	23.0757	4.01768	3.94584	16.63	10.7858	7.43282	22.2059	28.4508	18.5704	3.8454	4.4272	3.78045	4.04497	4.16973	3.62283
A_52_P423021	0.0298991	0.112468	1.86163	up	NM_028059	chr16:64784762-64784703	Zfp654	Mus musculus zinc finger protein 654 (Zfp654), mRNA [NM_028059]	GO:0008150|GO:0006355|GO:0005634|GO:0003677|GO:0046872|GO:0006351	NM_028059	Mm.25960	72020	119.889	138.013	7.41159	6.51502	150.73	121.001	87.9373	108.451	182.977	122.612	7.12111	7.81072	7.30292	6.32619	6.86787	6.35098
A_55_P2184493	0.243417	0.37923	1.22677	up	XM_006535878	chr1:87559346-87559405	Sp100	nuclear antigen Sp100 [Source:MGI Symbol;Acc:MGI:109561] [ENSMUST00000141998]	GO:0005515|GO:0006355|GO:0005737|GO:0016605|GO:0005634|GO:0003677|GO:0046872|GO:0006351	XM_006535878	Mm.428814	20684	20.8194	34.7134	4.8453	4.55044	29.9298	11.884	20.6445	34.5973	37.0991	32.4438	4.72699	4.56718	5.24174	4.68202	4.53307	4.43622
A_51_P400040	0.559668	0.670774	1.09672	up	NM_145441	chr12:4886922-4886863	Ubxn2a	Mus musculus UBX domain protein 2A (Ubxn2a), mRNA [NM_145441]	GO:0010468|GO:0005801|GO:0042176|GO:0005783|GO:0033130|GO:0031396|GO:0005829	NM_145441	Mm.259170	217379	1279.41	2030.3	10.6512	10.518	2070.47	820.159	947.6	1589.8	2509.9	1991.18	10.8882	10.3961	10.6693	10.24	10.7712	10.5429
A_55_P2173982	0.988016	0.992138	1.00513	up	NM_009104	chr12:25398824-25398883	Rrm2	Mus musculus ribonucleotide reductase M2 (Rrm2), mRNA [NM_009104]	GO:0005515|GO:0009186|GO:0005634|GO:0051290|GO:0005635|GO:0051259|GO:0046872|GO:0006260|GO:0005737|GO:0009263|GO:0009262|GO:0016491|GO:0004748|GO:0055114	NM_009104	Mm.99	20135	1196.19	2114.08	10.5996	10.5922	993.459	1717.41	877.712	2035.66	2321.83	1984.76	9.83079	11.4237	10.5442	10.5923	10.6491	10.5352
A_55_P1987231	0.00730111	0.0585166	1.36613	up	NM_001286217	chr7:147287049-147286990	Fuom	Mus musculus fucose mutarotase (Fuom), transcript variant 2, mRNA [NM_001286217]	GO:0045665|GO:0060180|GO:0016857|GO:0042806|GO:0006004|GO:0005575|GO:0048029|GO:0016853|GO:0036065|GO:0005996	NM_001286217	Mm.41915	69064	2857.86	3615.69	11.8413	11.3912	3751.9	2458.97	2362.71	3662.79	3941.93	3242.35	11.7106	11.9022	11.911	11.4527	11.4515	11.2693
A_55_P2000853	0.953103	0.969139	1.01553	up	NM_175184	chr2:33585553-33585494	Mvb12b	Mus musculus multivesicular body subunit 12B (Mvb12b), mRNA [NM_175184]	GO:0000813|GO:0005886|GO:0005770|GO:0005634|GO:0015031|GO:0031982|GO:0005829|GO:0008289|GO:0042058|GO:0016020|GO:0006810|GO:0005769|GO:0070062|GO:0005768	NM_175184	Mm.254914	72543	351.775	697.82	8.95988	8.93765	326.225	347.288	381.812	660.016	717.81	715.633	8.25578	9.24529	9.37857	8.9407	8.88934	8.98292
A_55_P1957618	0.00233156	0.038053	1.51928	up	NM_001033966	chr4:128685440-128685499	Ak2	Mus musculus adenylate kinase 2 (Ak2), transcript variant 1, mRNA [NM_001033966]	GO:0046033|GO:0046060|GO:0046034|GO:0097226|GO:0005743|GO:0036126|GO:0004017|GO:0005524|GO:0019205|GO:0005829|GO:0005739|GO:0005758|GO:0016310|GO:0006139|GO:0000166|GO:0016301|GO:0046939|GO:0016776|GO:0006172|GO:0016740|GO:0070062	NM_001033966	Mm.29460	11637	2535.03	2906.59	11.6633	11.0599	3572.39	2086.91	1945.8	2791.25	3372.98	2555.54	11.6452	11.6876	11.657	11.0588	11.2106	10.9102
A_55_P2166011	0.000409936	0.0253737	3.42925	up	XM_006504046	chr5:38659067-38659126	Tmem128	transmembrane protein 128 [Source:MGI Symbol;Acc:MGI:1913559] [ENSMUST00000119047]	GO:0008150|GO:0003674|GO:0016020|GO:0016021|GO:0005575	XM_006504046	Mm.256185	66309	217.729	129.304	8.22023	6.44233	322.004	187.12	144.062	102.38	135.703	149.829	8.23654	8.40631	8.01782	6.24526	6.42451	6.65723
A_52_P354271	0.0199526	0.0918326	2.03633	up	NM_026655	chr7:138487124-138487065	2310057M21Rik	Mus musculus RIKEN cDNA 2310057M21 gene (2310057M21Rik), mRNA [NM_026655]	GO:0008150|GO:0005575|GO:0042802	NM_026655	Mm.121122	68277	271.575	272.927	8.55742	7.53145	331.122	303.082	180.522	216.663	310.605	291.511	8.27519	9.06466	8.33241	7.32886	7.63811	7.62737
A_55_P2077213	0.379358	0.511287	1.07445	up	NM_007682	chr2:131003080-131003021	Cenpb	Mus musculus centromere protein B (Cenpb), mRNA [NM_007682]	GO:0006355|GO:0005694|GO:0003682|GO:0005634|GO:0003676|GO:0003677|GO:0000775	NM_007682	Mm.440169	12616	4161.9	6412.1	12.3639	12.2603	5581.31	3891.76	3012.65	6281.29	6318.01	6637.01	12.2929	12.5489	12.2499	12.2564	12.1792	12.3453
A_51_P485421	0.982207	0.988207	1.02633	up	AK088666	chr12:114659689-114659630		immunoglobulin heavy constant mu [Source:MGI Symbol;Acc:MGI:96448] [ENSMUST00000103426]			Mm.342177		401.29	707.815	8.54705	8.50956	63.3802	512.625	627.863	286.441	317.125	1519.88	5.83949	9.75539	10.0463	7.73209	7.66645	10.1301
A_55_P2086329	0.0271596	0.107016	1.55942	up	NM_016879	chr15:101346176-101346117	Krt85	Mus musculus keratin 85 (Krt85), mRNA [NM_016879]	GO:0005882|GO:0005198|GO:0045095	NM_016879	Mm.347934	53622	500.956	607.875	9.37382	8.73281	692.746	500.599	309.524	563.868	645.262	614.496	9.3052	9.72842	9.08783	8.71647	8.73686	8.74511
A_51_P102507	0.0422298	0.135627	1.59132	up	NM_029929	chr5:123979502-123979443	Vps33a	Mus musculus vacuolar protein sorting 33A (yeast) (Vps33a), mRNA [NM_029929]	GO:0032418|GO:0048471|GO:0030897|GO:0005770|GO:0032400|GO:0031410|GO:0005765|GO:0015031|GO:0032403|GO:0005764|GO:0006904|GO:0048070|GO:0016020|GO:0043473|GO:0006810|GO:0016192|GO:0005769|GO:0030220|GO:0005768	NM_029929	Mm.41372	77573	234.609	308.63	8.38949	7.71927	267.022	229.469	207.336	269.71	358.261	297.918	7.96068	8.68236	8.52545	7.65317	7.84266	7.66196
A_51_P143142	0.45012	0.576032	1.14016	up	NM_027204	chr11:120349740-120349799	Mrpl12	Mus musculus mitochondrial ribosomal protein L12 (Mrpl12), mRNA [NM_027204]	GO:0005739|GO:0005622|GO:0003735|GO:0030529|GO:0005761|GO:0005840|GO:0006390|GO:0045893|GO:0006412|GO:0005762	NM_027204	Mm.491127	56282	3256.25	4930.13	12.0484	11.8592	3582.03	3342.54	2844.17	5297.27	5249.49	4243.63	11.6505	12.3263	12.1684	12.0134	11.8861	11.6779
A_52_P431139	0.0040793	0.0465331	2.4074	up	BC138824	chr17:88876611-88876670	Foxn2	forkhead box N2 [Source:MGI Symbol;Acc:MGI:1347478] [ENSMUST00000134107]	GO:0006355|GO:0005634|GO:0035914|GO:0003677|GO:0006351|GO:0043231		Mm.112824	14236	15.6521	13.7162	4.50268	3.23521	19.7099	12.2329	15.0134	12.8646	13.2856	14.9983	4.10149	4.60665	4.7999	3.25806	3.13955	3.30802
A_55_P2078269	0.64988	0.743614	1.13014	up		chr7:017232990-017232931							3738.52	5653.11	12.2509	12.0744	3325.7	4070.65	3819.21	5353.72	5755.64	5849.96	11.5358	12.6166	12.6004	12.03	12.0309	12.1624
A_55_P2029687	0.0865437	0.203758	1.77192	up	NM_010442	chr8:77620797-77620856	Hmox1	Mus musculus heme oxygenase (decycling) 1 (Hmox1), mRNA [NM_010442]	GO:0008219|GO:0042542|GO:0043627|GO:0042803|GO:0043231|GO:0043524|GO:0042168|GO:0051260|GO:0042167|GO:0043123|GO:0006979|GO:0032764|GO:0043305|GO:0006788|GO:0043392|GO:0016491|GO:0010656|GO:0019899|GO:0071243|GO:0020037|GO:0055114|GO:0008285|GO:0007264|GO:0005783|GO:0004392|GO:0034101|GO:0004630|GO:0005634|GO:0055072|GO:0043433|GO:0046872|GO:0005829|GO:0035556|GO:0051090|GO:0071276|GO:0004871|GO:…	NM_010442	Mm.276389	15368	136.443	136.73	7.33521	6.5099	268.433	76.5239	64.3717	106.238	177.063	126.889	7.96971	7.16708	6.86883	6.29879	6.82029	6.41061
A_55_P2239564	0.0857109	0.202849	1.94629	up	AK135410	chr11:102398041-102397982	Gpatch8	Mus musculus 12 days embryo female mullerian duct includes surrounding region cDNA, RIKEN full-length enriched library, clone:6820415O06 product:hypothetical protein, full insert sequence. [AK135410]	GO:0005515|GO:0008150|GO:0003676|GO:0046872		Mm.260282	237943	613.605	624.135	9.70694	8.74621	546.41	530.67	763.735	478.596	738.071	655.739	8.97376	9.80325	10.3438	8.46547	8.93078	8.84238
A_52_P256914	0.589034	0.694767	1.09249	up	NM_010000	chr7:26983484-26983543	Cyp2b9	Mus musculus cytochrome P450, family 2, subfamily b, polypeptide 9 (Cyp2b9), mRNA [NM_010000]	GO:0004497|GO:0070330|GO:0016020|GO:0005506|GO:0005783|GO:0016491|GO:0016712|GO:0016705|GO:0046872|GO:0055114|GO:0043231|GO:0020037	NM_010000	Mm.14413	13094	352.47	649.123	8.9522	8.82458	413.017	341.747	302.645	554.567	658.2	734.602	8.57994	9.22165	9.05501	8.68812	8.76169	9.02394
A_55_P1954331	0.00326337	0.0430234	3.30263	up	NM_026509	chr4:48686163-48686222	Murc	Mus musculus muscle-related coiled-coil protein (Murc), mRNA [NM_026509]	GO:0030018|GO:0006355|GO:0005737|GO:0007517|GO:0032321|GO:0045944|GO:0055003|GO:0007275|GO:0007266|GO:0030154|GO:0006351|GO:0005100	NM_026509	Mm.133444	68016	15.3258	7.16226	4.28305	2.55944	27.5163	10.9278	7.53319	5	8.70146	7.78533	4.60149	4.44854	3.79912	2.32438	2.72526	2.62867
A_55_P2029106	0.213619	0.347661	1.39514	up	NM_138313	chr2:118354555-118354496	Bmf	Mus musculus BCL2 modifying factor (Bmf), mRNA [NM_138313]	GO:0032464|GO:0005515|GO:0005737|GO:0001669|GO:2001234|GO:2001235|GO:0090200|GO:0043276|GO:0006915|GO:0016459|GO:0015629	NM_138313	Mm.210125	171543	639.212	885.651	9.7719	9.29149	620.435	683.022	614.18	744.073	1003.04	909.843	9.14862	10.15	10.0171	9.1242	9.39579	9.3545
A_52_P278154	0.0130599	0.0745097	1.7481	up	NM_027236	chr19:5371355-5371414	Eif1ad	Mus musculus eukaryotic translation initiation factor 1A domain containing (Eif1ad), mRNA [NM_027236]	GO:0003723|GO:0003743|GO:0005634|GO:0045111|GO:0006413|GO:0043231	NM_027236	Mm.299167	69860	928.696	1010.23	10.2941	9.48829	1140.52	836.511	809.061	1093.84	1089.31	847.546	10.0272	10.4249	10.4301	9.69616	9.53107	9.23762
A_55_P2274233	0.157791	0.287835	1.36244	up	NM_139153	chr5:24007784-24007843	Agap3	Mus musculus ArfGAP with GTPase domain, ankyrin repeat and PH domain 3 (Agap3), transcript variant 1, mRNA [NM_139153]	GO:0007264|GO:0003924|GO:0005623|GO:0005634|GO:0005525|GO:0046872|GO:0071944|GO:0005622|GO:0006184|GO:0007165|GO:0008060|GO:0034644|GO:0005737|GO:0030578|GO:0016020|GO:0000166|GO:0032312|GO:0016605|GO:0034614|GO:0043161|GO:0008270|GO:0031593|GO:0000060|GO:0005096	NM_139153	Mm.250703	213990	1764.81	2353.53	11.2027	10.7565	1895.31	1495.91	1903.19	2393.84	2341.75	2325	10.7517	11.2319	11.6246	10.8312	10.663	10.7755
A_66_P133244	0.0388485	0.129831	1.63348	up	NM_009502	chr14:21848574-21849035	Vcl	Mus musculus vinculin (Vcl), mRNA [NM_009502]	GO:0005515|GO:0030018|GO:0002162|GO:0030054|GO:0005886|GO:0005884|GO:0030032|GO:0034333|GO:0015629|GO:0043297|GO:0005916|GO:0005737|GO:0005913|GO:0005912|GO:0014704|GO:0005911|GO:0005856|GO:0007155|GO:0070062|GO:0090136|GO:0030334|GO:0001725|GO:0045294|GO:0003779|GO:0042383|GO:0043234|GO:0016020|GO:0005198|GO:0034394|GO:0043034|GO:0017048|GO:0002009|GO:0005925	NM_009502	Mm.279361	22330	102.435	132.783	7.16	6.45205	145.244	70.3893	91.6698	112.173	180.511	105.663	7.06952	7.04642	7.36407	6.36852	6.8507	6.13693
A_51_P464822	0.326837	0.461737	1.33731	up	NM_015787	chr13:23713766-23713707	Hist1h1e	Mus musculus histone cluster 1, H1e (Hist1h1e), mRNA [NM_015787]	GO:0005515|GO:0005694|GO:0006334|GO:0005730|GO:0016584|GO:0005634|GO:0000786|GO:0003677	NM_015787	Mm.170587	50709	104.163	165.137	7.23405	6.81471	98.6911	102.303	111.496	162.928	173.199	159.283	6.49135	7.56339	7.6474	6.91321	6.79047	6.74045
A_51_P151371	0.420216	0.548709	1.24954	up	NM_028316	chr7:6139783-6139843	Zfp444	Mus musculus zinc finger protein 444 (Zfp444), transcript variant 2, mRNA [NM_028316]	GO:0006366|GO:0006357|GO:0000981|GO:0005634|GO:0046872	NM_028316	Mm.274089	72667	16.9571	29.1566	4.62345	4.30206	17.8803	13.8482	19.1427	26.3171	28.4415	32.7111	3.95626	4.78022	5.13388	4.28856	4.16923	4.44839
A_51_P343613	0.885462	0.922953	1.05701	up	NM_153068	chr7:16535347-16535288	Ehd2	Mus musculus EH-domain containing 2 (Ehd2), mRNA [NM_153068]	GO:0005515|GO:0048471|GO:0005886|GO:2001137|GO:0032456|GO:0005509|GO:0019904|GO:0003924|GO:0005525|GO:0072659|GO:0005524|GO:0046872|GO:0006897|GO:0000166|GO:0016020|GO:0016787|GO:0030866|GO:0005901|GO:0055038|GO:0070062|GO:0005768	NM_153068	Mm.138215	259300	63.081	125.878	6.4923	6.41231	49.1251	62.965	77.1529	120.484	136.817	120.331	5.46293	6.88633	7.12764	6.4719	6.43896	6.32607
A_55_P2167655	0.372545	0.505136	1.42193	up		chr11:059025849-059025908							22.1388	34.5735	5.00808	4.50023	19.3541	20.8662	26.1961	24.0154	43.7708	35.9342	4.07423	5.36438	5.58563	4.14864	4.77535	4.57671
A_52_P227279	0.00677897	0.0569559	3.38684	up	NM_011703	chr9:121579630-121579689	Vipr1	Mus musculus vasoactive intestinal peptide receptor 1 (Vipr1), mRNA [NM_011703]	GO:0043235|GO:0007165|GO:0016020|GO:0007186|GO:0005886|GO:0004999|GO:0004930|GO:0016021|GO:0004871|GO:0007166|GO:0004888	NM_011703	Mm.282007	22354	467.352	281.895	9.34082	7.58088	447.022	500.699	454.336	226.363	322.519	296.802	8.68676	9.72906	9.60665	7.39332	7.69419	7.65514
A_55_P1961938	0.476203	0.598746	1.47007	up	NM_027132	chr11:115208182-115208240	Otop3	Mus musculus otopetrin 3 (Otop3), mRNA [NM_027132]	GO:0008150|GO:0003674|GO:0016020|GO:0016021	NM_027132	Mm.101844	69602	8746.74	10480.3	13.3067	12.7508	13832	4117.01	8291.21	15187.7	4118.92	12134.4	13.5716	12.6337	13.7147	13.5196	11.5206	13.2122
A_51_P363303	0.000735247	0.0281304	4.38529	up	NM_027644	chr17:23974047-23973988	Prss41	Mus musculus protease, serine 41 (Prss41), mRNA [NM_027644]	GO:0016787|GO:0016020|GO:0005886|GO:0004252|GO:0006508|GO:0043229|GO:0008236|GO:0008233|GO:0031225|GO:0003824	NM_027644	Mm.328839	71003	136.019	66.6344	7.61829	5.48562	156.107	117.378	134.571	59.1337	70.1112	70.6583	7.17352	7.76625	7.91512	5.44648	5.46325	5.54714
A_55_P2061391	0.024095	0.10083	2.54223	up	AK081381	chr13:76050287-76050228	Rhobtb3	Mus musculus 16 days embryo head cDNA, RIKEN full-length enriched library, clone:C130012H18 product:perlecan (heparan sulfate proteoglycan 2), full insert sequence. [AK081381]	GO:0005515|GO:0017137|GO:0005794|GO:0006200|GO:0007264|GO:0005623|GO:0005525|GO:0005524|GO:0005622|GO:0005737|GO:0000166|GO:0016787|GO:0006810|GO:0042147|GO:0016887		Mm.276200	73296	148.514	129.489	7.74528	6.39918	157.566	146.382	141.595	80.8134	147.66	159.995	7.18726	8.06406	7.9845	5.89525	6.55559	6.74669
A_55_P2162136	0.756448	0.828041	1.04721	up	NM_016957	chr4:133521925-133521866	Hmgn2	Mus musculus high mobility group nucleosomal binding domain 2 (Hmgn2), mRNA [NM_016957]	GO:0040034|GO:0006357|GO:0005634|GO:0000122	NM_016957	Mm.319660	15331	1455.91	2543.33	10.9352	10.8687	1681.63	1432.72	1253.38	2712.2	2379.93	2537.84	10.5898	11.1682	11.0477	11.0154	10.6896	10.901
A_55_P1956171	0.337775	0.47266	1.18547	up	XM_006544538	chr5:147645779-147646649	LOC102641365	PREDICTED: Mus musculus 60S ribosomal protein L21-like (LOC102641365), mRNA [XM_006544538]		XM_006544538		102641365	5770.68	8435.87	12.8898	12.6443	6338.7	5610.03	5363.31	7216.12	9338.2	8753.28	12.4823	13.0935	13.0935	12.4505	12.7388	12.7436
A_52_P109010	0.00261823	0.0397354	2.38938	up	NM_010434	chr2:104266820-104266761	Hipk3	Mus musculus homeodomain interacting protein kinase 3 (Hipk3), transcript variant 1, mRNA [NM_010434]	GO:0005515|GO:0005634|GO:0005737|GO:0000166|GO:0018105|GO:0016301|GO:0018107|GO:0043508|GO:0016772|GO:0006355|GO:0043066|GO:0003714|GO:0006915|GO:0000122|GO:0005524|GO:0003677|GO:0006351|GO:0016310|GO:0004672|GO:0004674|GO:0016605|GO:0043388|GO:0006468|GO:0009299|GO:0016740	NM_010434	Mm.257925	15259	2557.02	1896.28	11.6965	10.4399	3152.22	2624.19	1894.63	1792.16	1789.06	2107.63	11.4703	12.0001	11.6191	10.416	10.2751	10.6286
A_55_P2136501	0.00175322	0.0348947	2.43643	up	NM_021565	chr10:79621032-79621091	Midn	Mus musculus midnolin (Midn), mRNA [NM_021565]	GO:0005730|GO:0005634|GO:0033132|GO:0019900|GO:0046676|GO:0005829	NM_021565	Mm.143813	59090	11121.4	7252.09	13.7141	12.4293	17568.5	9196.15	6599.45	6835.56	6986	7934.71	13.9152	13.8107	13.4163	12.3733	12.3225	12.5921
A_55_P2144115	0.00610342	0.0545223	2.39501	up	NM_028589	chr11:84994547-84994606	1700125H20Rik	Mus musculus RIKEN cDNA 1700125H20 gene (1700125H20Rik), mRNA [NM_028589]	GO:0008150|GO:0003674|GO:0005575	NM_028589	Mm.48850	73634	15.2601	13.0936	4.44395	3.18392	19.9859	15.0458	10.7486	12.8312	13.1216	13.3279	4.12398	4.90208	4.30578	3.25379	3.12719	3.17077
A_55_P2026275	0.147934	0.276718	1.46956	up	NM_144828	chr11:98218965-98219024	Ppp1r1b	Mus musculus protein phosphatase 1, regulatory (inhibitor) subunit 1B (Ppp1r1b), mRNA [NM_144828]	GO:0004864|GO:0004865|GO:0005634|GO:0043086|GO:0006351|GO:0035556|GO:0005622|GO:0007165|GO:0001975|GO:0005737|GO:0031749|GO:0031748|GO:0008542|GO:0043025|GO:0031752|GO:0007621|GO:0031751|GO:0031750	NM_144828	Mm.45372	19049	5965.36	7069.93	12.9388	12.3835	5875.04	5894.82	6126.23	6027.84	8538.97	6642.97	12.3701	13.1671	13.2794	12.1968	12.6066	12.347
A_52_P252258	0.142265	0.26981	1.65181	up	NM_013871	chr15:88961326-88961267	Mapk12	Mus musculus mitogen-activated protein kinase 12 (Mapk12), mRNA [NM_013871]	GO:0006355|GO:0000287|GO:0006950|GO:0005634|GO:0045786|GO:0005524|GO:0046872|GO:0006351|GO:0005739|GO:0016310|GO:0007049|GO:0005737|GO:0004672|GO:0018105|GO:0000166|GO:0016301|GO:0000165|GO:0004674|GO:0045445|GO:0006468|GO:0016740|GO:0016772|GO:0004707	NM_013871	Mm.38343	29857	87.1217	115.115	6.98304	6.259	83.0248	88.3111	90.0292	85.9932	136.569	122.783	6.23798	7.37181	7.33934	5.98934	6.43546	6.3522
A_55_P2092350	0.200605	0.333529	2.00467	up		chr10:121023334-121023275							46.9037	48.7394	6.02138	5.01802	30.8353	64.6488	45.2272	39.6326	60.139	46.4467	4.77148	6.92258	6.37008	4.87308	5.24968	4.93129
A_55_P1959374	0.255289	0.391212	1.62362	up	NM_146871	chr9:38157500-38157559	Olfr898	Mus musculus olfactory receptor 898 (Olfr898), mRNA [NM_146871]	GO:0050911|GO:0007608|GO:0007165|GO:0004984|GO:0016020|GO:0007186|GO:0005886|GO:0004930|GO:0016021|GO:0004871|GO:0050896	NM_146871	Mm.377729	258871	12.8708	17.3047	4.20875	3.50953	11.1508	10.1429	17.3186	13.4633	22.7863	15.6644	3.28952	4.33589	5.00083	3.30994	3.85261	3.36605
A_55_P2136732	0.272288	0.408222	1.38777	up	NM_025584		Cd99	Mus musculus CD99 antigen (Cd99), mRNA [NM_025584]	GO:0005515|GO:0016020|GO:0016021|GO:0001773	NM_025584	Mm.423040	673094	2644.78	3377.78	11.7578	11.285	2451.73	2306.88	3175.73	3477.45	2973.96	3681.94	11.1295	11.8168	12.327	11.3747	11.0227	11.4576
A_52_P370392	0.861368	0.905784	1.02059	up	NM_021921	chr15:89292680-89292739	Mapk8ip2	Mus musculus mitogen-activated protein kinase 8 interacting protein 2 (Mapk8ip2), mRNA [NM_021921]	GO:0005515|GO:0010469|GO:2000311|GO:2000310|GO:0032874|GO:0032403|GO:0046328|GO:0005737|GO:0016301|GO:0000165|GO:0045860|GO:0043025|GO:0001662|GO:0051966|GO:0019901|GO:0007617|GO:0007254|GO:0060079|GO:0030295|GO:0016310|GO:0043234|GO:0048813|GO:0035176|GO:0019894|GO:0016740|GO:0046958	NM_021921	Mm.482169	60597	24.6329	51.4736	5.1425	5.1131	32.8664	18.0571	22.9753	45.3796	56.3185	52.7229	4.86178	5.16585	5.39986	5.06576	5.15473	5.11881
A_52_P511821	0.00759018	0.0591648	3.15704	up	NM_027057	chr1:79723101-79723042	Wdfy1	Mus musculus WD repeat and FYVE domain containing 1 (Wdfy1), transcript variant 2, mRNA [NM_027057]	GO:0008150|GO:0005545|GO:0005634|GO:0046872|GO:0005769|GO:0005829	NM_027057	Mm.293273	69368	74.6267	51.1199	6.76066	5.10209	75.5348	66.9942	81.351	46.0231	55.4389	51.8977	6.10903	6.97021	7.20274	5.08571	5.13023	5.09033
A_55_P2005330	0.190183	0.322169	1.46304	up	NM_053208	chr7:27944079-27944020	Egln2	Mus musculus EGL nine homolog 2 (C. elegans) (Egln2), mRNA [NM_053208]	GO:0031545|GO:0001666|GO:0045732|GO:0031543|GO:0031418|GO:0005506|GO:0051213|GO:0005634|GO:0046872|GO:0005829|GO:0043523|GO:0018401|GO:0019826|GO:0016491|GO:0016706|GO:0045454|GO:0016705|GO:0055114	NM_053208	Mm.29978	112406	829.67	1078.22	10.142	9.59302	775.236	874.866	838.909	949.37	1232.15	1053.14	9.45785	10.4847	10.4834	9.48356	9.71129	9.58422
A_55_P2120714	0.113218	0.235873	1.30419	up	AK021392	chr5:24728725-24728666		RIKEN cDNA E130116L18 gene [Source:MGI Symbol;Acc:MGI:1925120] [ENSMUST00000066954]			Mm.246718		134.354	216.987	7.59343	7.21027	161.254	118.026	123.782	203.551	225.906	221.505	7.21583	7.77474	7.78971	7.23318	7.18089	7.21675
A_55_P2045203	0.0128812	0.0740507	1.69265	up	NM_019769	chr2:119412671-119412730	Chp1	Mus musculus calcineurin-like EF hand protein 1 (Chp1), mRNA [NM_019769]	GO:0008017|GO:0030133|GO:0005215|GO:0032417|GO:0005886|GO:0005783|GO:0001578|GO:0005634|GO:0031122|GO:0015031|GO:0051259|GO:0046872|GO:0005829|GO:0031953|GO:0045056|GO:0005737|GO:0010923|GO:0017156|GO:0006611|GO:0015630|GO:0006810|GO:0061024|GO:0061025|GO:0060050|GO:0031397|GO:0005856|GO:0019900|GO:0070062|GO:0022406|GO:0005509|GO:0050821|GO:0032088|GO:0070885|GO:0051222|GO:0000139|GO:0016020|GO:…	NM_019769	Mm.214765	56398	14258.3	14609.2	14.2004	13.4411	16858.3	13266.6	12649.9	13351.1	15735.3	14741.2	13.8632	14.3806	14.3573	13.3306	13.5009	13.4917
A_55_P2150343	0.695377	0.7813	1.03609	up	NM_001037298	chr8:125005680-125005621	Piezo1	Mus musculus piezo-type mechanosensitive ion channel component 1 (Piezo1), mRNA [NM_001037298]	GO:0005261|GO:0008381|GO:0005886|GO:0005783|GO:0033625|GO:0033634|GO:0034220|GO:0050982|GO:0016020|GO:0042391|GO:0006810|GO:0016021|GO:0006812|GO:0006811	NM_001037298	Mm.37324	234839	1173.49	2054.93	10.6071	10.5559	1556.31	993.251	970.909	2115.57	1893.47	2155.75	10.4735	10.6518	10.696	10.6535	10.3546	10.6597
A_51_P203653	0.0190275	0.0897154	1.98308	up	NM_177195	chr4:43347067-43347126	Atp8b5	Mus musculus ATPase, class I, type 8B, member 5 (Atp8b5), mRNA [NM_177195]	GO:0000287|GO:0001669|GO:0031410|GO:0005548|GO:0005524|GO:0046872|GO:0019829|GO:0016787|GO:0000166|GO:0015914|GO:0016020|GO:0004012|GO:0006869|GO:0006810|GO:0007030|GO:0016021|GO:0006812	NM_177195	Mm.74465	320571	16.2395	16.2159	4.41905	3.43131	26.2643	8.04886	14.4052	13.3556	20.3725	14.9194	4.53654	3.98652	4.73409	3.29949	3.69495	3.29949
A_55_P1981105	0.967559	0.978398	1.00704	up	NM_001243043	chr11:4942521-4942580	Ap1b1	Mus musculus adaptor protein complex AP-1, beta 1 subunit (Ap1b1), transcript variant 1, mRNA [NM_001243043]	GO:0005515|GO:0005802|GO:0030131|GO:0005794|GO:0031410|GO:0015031|GO:0006886|GO:0030117|GO:0016020|GO:0008565|GO:0006810|GO:0016192|GO:0048268	NM_001243043	Mm.274816	11764	4384.15	7487.28	12.4864	12.4763	4755.08	4114.49	4282.88	8185.83	7442.78	6833.22	12.0551	12.6327	12.7715	12.6364	12.4164	12.3761
A_55_P2158112	0.546806	0.659882	1.08444	up	NM_027015	chr9:114891568-114891509	Rps27	Mus musculus ribosomal protein S27 (Rps27), transcript variant 1, mRNA [NM_027015]	GO:0005515	NM_027015	Mm.270283	57294	51210.8	85358.3	16.0351	15.9182	74280.2	47129.9	32222.3	85120.7	81371.6	89582.6	15.9078	16.3728	15.8247	15.8836	15.8532	16.0177
A_51_P214470	0.989964	0.993481	1.00621	up	NM_173744	chr8:13952453-13952395	Tdrp	Mus musculus testis development related protein (Tdrp), mRNA [NM_173744]	GO:0003674|GO:0005737|GO:0005634|GO:0007283	NM_173744	Mm.5727	72148	15.2196	32.385	4.4437	4.43477	9.37481	16.0416	20.2423	25.9104	36.6387	34.6059	3.12513	4.99196	5.21403	4.26375	4.51366	4.52689
A_55_P2373852	0.0248328	0.102471	4.59003	up	AK009987	chr12:117619193-117619252	2310058N22Rik	Mus musculus adult male tongue cDNA, RIKEN full-length enriched library, clone:2310058N22 product:unclassifiable, full insert sequence. [AK009987]			Mm.440654	71921	369.246	157.714	8.94139	6.74289	224.145	458.91	424.683	141.872	153.68	177.591	7.69822	9.61241	9.51355	6.72147	6.61254	6.89465
A_51_P115471	0.00878559	0.0623047	6.68058	up	AK046043	chr15:77578413-77578354	Apol8	apolipoprotein L 8 [Source:MGI Symbol;Acc:MGI:2444921] [ENSMUST00000089450]	GO:0008150|GO:0003674|GO:0005575		Mm.125650	239552	38.9935	11.1435	5.74984	3.00987	35.1368	56.2979	25.5458	15.2579	9.85613	8.3164	4.9622	6.73342	5.55391	3.48221	2.85082	2.69659
A_55_P1956513	0.0172346	0.0855443	1.29717	up	BC048867	chrX:35064755-35064696	Rhox4g	reproductive homeobox 4G [Source:MGI Symbol;Acc:MGI:3613394] [ENSMUST00000184625]	GO:0008150|GO:0005634|GO:0005575|GO:0003677		Mm.327419	664608	45.1084	72.6797	5.98558	5.61021	65.0201	36.0615	34.2435	67.4233	83.0232	67.5927	5.88309	6.11942	5.95423	5.63807	5.70679	5.48576
A_52_P582858	0.440581	0.56798	1.08771	up	NM_177646	chr1:89840990-89841049	Dgkd	Mus musculus diacylglycerol kinase, delta (Dgkd), mRNA [NM_177646]	GO:0016310|GO:0005737|GO:0010033|GO:0046982|GO:0005886|GO:0004143|GO:0016023|GO:0051260|GO:0042803|GO:0046339	NM_177646	Mm.277217	227333	4915.02	7557.48	12.607	12.4857	6761.42	4146.14	3837.51	6527.6	7277.1	8867.74	12.5641	12.6461	12.6109	12.3112	12.3837	12.7622
A_51_P324975	0.240859	0.376536	1.50699	up	NM_146776	chr10:129471243-129471302	Olfr821	Mus musculus olfactory receptor 821 (Olfr821), mRNA [NM_146776]	GO:0050911|GO:0007608|GO:0007165|GO:0004984|GO:0016020|GO:0007186|GO:0005886|GO:0004930|GO:0016021|GO:0004871|GO:0050896	NM_146776	Mm.391459	258772	41.2855	60.3953	5.91641	5.32475	38.4532	39.093	46.3103	50.592	75.6939	54.9	5.10144	6.24016	6.40764	5.22303	5.58013	5.17108
A_51_P291361	0.452754	0.578404	1.17106	up	NM_001013365	chr11:4140146-4140205	Osm	Mus musculus oncostatin M (Osm), mRNA [NM_001013365]	GO:0042506|GO:0005147|GO:0008284|GO:0042503|GO:0009408|GO:0042508|GO:2001235|GO:0050731|GO:0005576|GO:0005125|GO:0005615|GO:0046888|GO:0006955|GO:0033138|GO:0045944|GO:0005900|GO:0007422|GO:0043410|GO:0048266|GO:0045835|GO:0008083|GO:0040008	NM_001013365	Mm.131422	18413	18.3539	34.3646	4.73065	4.50283	23.2952	17.5875	14.1791	24.6523	40.6654	37.7761	4.35054	5.12797	4.71344	4.18862	4.67272	4.64717
A_55_P1967931	0.786181	0.850506	1.01886	up	AK020469	chr18:52650449-52650508	Srfbp1	Mus musculus 12 days embryo embryonic body between diaphragm region and neck cDNA, RIKEN full-length enriched library, clone:9430057L15 product:hypothetical protein, full insert sequence. [AK020469]	GO:0005515|GO:0008150|GO:0006355|GO:0005737|GO:0005634|GO:0006351		Mm.100617	67222	157.728	306.727	7.73892	7.71196	247.841	116.16	109.182	294.377	342.067	283.738	7.85012	7.75218	7.61446	7.77206	7.77775	7.58606
A_55_P2079079	0.756413	0.828041	1.57503	up	NM_009844	chr7:133552583-133552524	Cd19	Mus musculus CD19 antigen (Cd19), mRNA [NM_009844]	GO:0050853|GO:0016020|GO:0016021|GO:0009897|GO:0070062	NM_009844	Mm.4360	12478	235.262	352.761	7.62728	6.9719	25.2497	294.244	386.29	72.2347	91.6039	894.443	4.47157	9.01877	9.3915	5.73117	5.85511	9.32941
A_51_P126626	0.373045	0.505512	1.26546	up	NM_145459	chr14:22803318-22803259	Zfp503	Mus musculus zinc finger protein 503 (Zfp503), mRNA [NM_145459]	GO:0061351|GO:0006355|GO:0008285|GO:0010629|GO:0070315|GO:0005634|GO:0003676|GO:0046872|GO:0006351	NM_145459	Mm.292401	218820	110.925	185.935	7.32266	6.983	113.322	96.8562	122.597	179.4	174.399	204.008	6.69159	7.49712	7.77927	7.04552	6.79941	7.10408
A_51_P507801	0.00393198	0.0460084	6.87141	up	NM_028784	chr13:36959273-36959214	F13a1	Mus musculus coagulation factor XIII, A1 subunit (F13a1), transcript variant 1, mRNA [NM_028784]	GO:0007599|GO:0005737|GO:0018149|GO:0016746|GO:0007596|GO:0003810|GO:0072562|GO:0005576|GO:0046872|GO:0016740	NM_028784	Mm.235105	74145	68.64	22.0482	6.62745	3.84684	85.1113	63.4159	57.3927	29.3662	11.7369	25.0413	6.27549	6.89476	6.7121	4.44584	3.01967	4.07502
A_55_P2115003	0.00795244	0.0603028	4.02372	up	NM_027297	chr4:62087853-62087912	Prpf4	Mus musculus PRP4 pre-mRNA processing factor 4 homolog (yeast) (Prpf4), mRNA [NM_027297]	GO:0008380|GO:0006397|GO:0003674|GO:0015030|GO:0000398|GO:0005681|GO:0005634|GO:0046540|GO:0071001	NM_027297	Mm.30660	70052	382.025	183.117	8.9752	6.96667	406.064	524.337	215.675	175.159	183.771	190.422	8.55188	9.78714	8.58658	7.01797	6.87706	7.00498
A_51_P118168	0.0219767	0.0962269	1.94152	up	NM_027947	chr2:33309244-33309185	Zbtb43	Mus musculus zinc finger and BTB domain containing 43 (Zbtb43), transcript variant 1, mRNA [NM_027947]	GO:0008150|GO:0006355|GO:0005634|GO:0003676|GO:0003677|GO:0046872|GO:0006351	NM_027947	Mm.44186	71834	894.239	892.579	10.2525	9.29536	987.461	819.747	875.508	698.019	1087.96	891.755	9.82132	10.3945	10.5418	9.03117	9.52884	9.32608
A_55_P2088725	0.570002	0.679549	1.11959	up	NM_021522	chr18:9995651-9995592	Usp14	Mus musculus ubiquitin specific peptidase 14 (Usp14), transcript variant 1, mRNA [NM_021522]	GO:0006511|GO:0016579|GO:0000502|GO:0004843|GO:0004866|GO:0005886|GO:0009986|GO:0045202|GO:0007268|GO:0010951|GO:0005737|GO:0016787|GO:0016020|GO:0061136|GO:0050920|GO:0070628|GO:0006508|GO:0016023|GO:0008233|GO:0004221|GO:0008234	NM_021522	Mm.329277	59025	1348.38	2179.59	10.8021	10.6391	1505.58	1569.97	969.594	2290.63	2194.52	2053.63	10.4225	11.2902	10.6935	10.7624	10.5655	10.5895
A_65_P20371	0.241616	0.37749	1.17105	up	NM_001025392	chr10:20059589-20059648	Bclaf1	Mus musculus BCL2-associated transcription factor 1 (Bclaf1), transcript variant 1, mRNA [NM_001025392]	GO:0005515|GO:0006355|GO:0043065|GO:2001022|GO:0006915|GO:0005634|GO:2001244|GO:0043620|GO:2000144|GO:0003677|GO:0006351|GO:0005737|GO:0045892	NM_001025392	Mm.294783	72567	1115.1	1702.93	10.5031	10.2753	1503.63	1101.79	739.883	1473.68	1915.06	1720.05	10.42	10.7938	10.2956	10.136	10.3728	10.3172
A_55_P2041082	0.336975	0.471846	1.2214	up		chr4:058624473-058624532							24.0917	42.7994	5.13645	4.84791	28.5623	20.4755	23.2372	41.7151	49.1499	37.5331	4.65365	5.33848	5.41722	4.94586	4.9622	4.63567
A_51_P106397	0.314077	0.449093	1.38694	up	NM_029239	chr17:79352028-79351323	Prkd3	Mus musculus protein kinase D3 (Prkd3), transcript variant 2, mRNA [NM_029239]	GO:0005634|GO:0005524|GO:0046872|GO:0035556|GO:0016310|GO:0005737|GO:0004672|GO:0000166|GO:0016020|GO:0004674|GO:0016301|GO:0006468|GO:0004697|GO:0016740|GO:0016772	NM_029239	Mm.252776	75292	74.3574	117.611	6.75856	6.28666	71.3455	78.0125	73.7141	83.5399	141.716	127.575	6.01817	7.19815	7.05936	5.94542	6.49648	6.41807
A_51_P141390	0.48614	0.607335	1.17682	up	NM_008569	chr2:128438556-128438497	Anapc1	Mus musculus anaphase promoting complex subunit 1 (Anapc1), mRNA [NM_008569]	GO:0005515|GO:0007067|GO:0007049|GO:0070979|GO:0005680|GO:0005634|GO:0051301	NM_008569	Mm.277408	17222	2322.27	3518.18	11.5859	11.351	2219.22	2628.88	2118.71	3419.07	3789.49	3345.98	10.9906	12.0036	11.7637	11.3417	11.3942	11.3172
A_51_P353592	0.121951	0.246237	1.4131	up	NM_025417	chr9:57003081-57003022	Commd4	Mus musculus COMM domain containing 4 (Commd4), mRNA [NM_025417]	GO:0008150|GO:0003674|GO:0005737	NM_025417	Mm.41687	66199	820.499	1095.94	10.1252	9.62635	868.84	857.005	735.652	1037.27	1129.39	1121.17	9.62891	10.4602	10.2865	9.61679	9.58047	9.68179
A_52_P676198	0.572173	0.681501	1.11212	up	NM_025912	chr2:172178905-172178964	Fam210b	Mus musculus family with sequence similarity 210, member B (Fam210b), mRNA [NM_025912]	GO:0008150|GO:0003674|GO:0016020|GO:0016021|GO:0005575	NM_025912	Mm.30013	67017	195.11	371.848	8.12416	7.97085	232.284	180.463	172.583	303.601	485.155	326.787	7.74805	8.35679	8.26763	7.81943	8.29456	7.79855
A_55_P1966958	0.0584955	0.163071	1.51318	up	NM_133665	chr3:87972971-87973030	Mef2d	Mus musculus myocyte enhancer factor 2D (Mef2d), mRNA [NM_133665]	GO:0003700|GO:0006366|GO:0042826|GO:0000981|GO:0005634|GO:0035914|GO:0030154|GO:0042803|GO:0043231|GO:0002062|GO:0045944|GO:0046983|GO:0033613|GO:0006355|GO:0000977|GO:0046982|GO:0006915|GO:0007275|GO:0003677|GO:0006351|GO:0001649|GO:0007399|GO:0001958|GO:0019899|GO:0045893	NM_133665	Mm.28184	17261	112.866	158.789	7.34974	6.75216	132.443	95.4455	110.709	142.715	187.961	145.691	6.93831	7.4764	7.63451	6.72905	6.91162	6.61579
A_55_P2095880	0.347489	0.481588	1.53122	up	NM_001081981	chr8:87228818-87228759	Nfix	Mus musculus nuclear factor I/X (Nfix), transcript variant 3, mRNA [NM_001081981]	GO:0005515|GO:0006355|GO:0003700|GO:0048708|GO:0005634|GO:0021549|GO:0000122|GO:0003677|GO:0006351|GO:0005622|GO:0006260|GO:0021707|GO:0021680|GO:0045944	NM_001081981	Mm.9394	18032	42.8374	59.0444	5.93286	5.31818	31.0293	45.2416	52.2412	56.716	60.401	60.0162	4.78246	6.43654	6.57959	5.38946	5.25698	5.30809
A_52_P549973	0.216044	0.350265	1.47358	up	NM_025744	chr2:70361114-70361411	Erich2	Mus musculus glutamate rich 2 (Erich2), mRNA [NM_025744]	GO:0008150|GO:0003674|GO:0005575	NM_025744	Mm.423014	66748	18.7762	27.6404	4.72544	4.16612	27.6053	13.7252	14.998	32.9948	16.913	33.0134	4.60665	4.77129	4.79839	4.61742	3.41888	4.46206
A_52_P554267	0.491768	0.612194	1.14797	up	NM_010561	chr9:21209475-21209534	Ilf3	Mus musculus interleukin enhancer binding factor 3 (Ilf3), transcript variant 1, mRNA [NM_010561]	GO:0003725|GO:0017148|GO:0006355|GO:0003723|GO:0005634|GO:0003677|GO:0006351|GO:0005739|GO:0051607|GO:0005737|GO:0030529|GO:0006479|GO:0006468|GO:0045893|GO:0019899|GO:0045892|GO:0045071	NM_010561	Mm.440026	16201	401.461	693.145	9.12392	8.92484	449.309	312.957	442.116	610.961	709.477	758.996	8.69491	9.10726	9.5696	8.83482	8.86727	9.07243
A_55_P2158072	0.441021	0.568391	1.35981	up		chr11:099708287-099708228							79.6079	100.405	6.53329	6.08989	141.708	23.0039	74.1113	93.0458	101.266	106.903	7.03304	5.49931	7.06753	6.10855	6.00619	6.15492
A_52_P73559	0.106712	0.228456	1.33082	up	XM_006543539	chr1:134181285-134181344	Gm7241	PREDICTED: Mus musculus predicted pseudogene 7241 (Gm7241), mRNA [XM_006543539]		XM_006543539		638532	250.16	385.462	8.45575	8.04343	314.284	257.429	178.767	366.605	416.227	373.555	8.20429	8.84456	8.3184	8.07708	8.05908	7.99413
A_55_P2144556	0.300959	0.4356	1.12469	up	NM_001172160	chr2:140485120-140485061	Flrt3	Mus musculus fibronectin leucine rich transmembrane protein 3 (Flrt3), transcript variant 1, mRNA [NM_001172160]	GO:0005515|GO:0045499|GO:0016020|GO:0007411|GO:0050919|GO:0016021|GO:0005615	NM_001172160	Mm.426781	71436	1696.12	2570.18	11.0563	10.8867	2614.87	1442.35	1031.16	2625.74	2639.11	2445.68	11.211	11.177	10.7809	10.9601	10.8501	10.8501
A_51_P128499	0.198309	0.331185	1.2887	up	NM_001081066	chr15:73401925-73401984	Dennd3	Mus musculus DENN/MADD domain containing 3 (Dennd3), mRNA [NM_001081066]	GO:0005622|GO:0005085|GO:0017112|GO:0032313|GO:0008333|GO:0005623|GO:0044257	NM_001081066	Mm.322557	105841	201.193	333.004	8.16414	7.79822	251.351	168.616	183.611	232.556	413.78	352.676	7.87218	8.26578	8.35447	7.43663	8.05205	7.90597
A_55_P1967342	0.39425	0.524813	1.16289	up		chr11:085764019-085764078							7866.35	11570.1	13.3263	13.1086	8670.87	7795.24	7132.95	10112.1	12567.9	12030.3	12.9045	13.5602	13.5143	12.9359	13.1924	13.1974
A_55_P2122380	0.390719	0.521654	1.152	up	NM_011748	chr7:30823198-30823139	Zfp14	Mus musculus zinc finger protein 14 (Zfp14), transcript variant 1, mRNA [NM_011748]	GO:0005622|GO:0006355|GO:0003700|GO:0005634|GO:0003676|GO:0003677|GO:0046872	NM_011748	Mm.347644	243906	136.53	227.85	7.46605	7.26191	236.973	92.0648	80.5513	178.758	275.427	229.365	7.77841	7.43231	7.18743	7.04028	7.47378	7.27166
A_51_P382789	0.302949	0.437603	1.29557	up	NM_027025	chr3:105721698-105722939	Adora3	Mus musculus adenosine A3 receptor (Adora3), transcript variant 2, mRNA [NM_027025]	GO:0005886|GO:0004930|GO:0014068|GO:0070257|GO:0050850|GO:0043306|GO:0001609|GO:0007165|GO:0001973|GO:0002553|GO:0007186|GO:0016020|GO:0005887|GO:0050729|GO:0002687|GO:0004871|GO:0016021	NM_027025	Mm.235024	11542	9.3502	15.7819	3.76363	3.39004	11.3095	7.72491	9.01614	13.2475	21.9953	12.1029	3.30754	3.92663	4.05672	3.28999	3.80385	3.07628
A_51_P426283	0.287372	0.423	1.20544	up	NM_133347	chr9:109986933-109986874	Dhx30	Mus musculus DEAH (Asp-Glu-Ala-His) box polypeptide 30 (Dhx30), transcript variant 2, mRNA [NM_133347]	GO:0003725|GO:0008026|GO:0042645|GO:0003723|GO:0004386|GO:0003676|GO:0005524|GO:0005739|GO:0008150|GO:0005737|GO:0000166|GO:0016787|GO:0003682	NM_133347	Mm.276305	72831	973.237	1504.39	10.3614	10.0919	1105.26	1006.19	808.271	1598.43	1577.44	1337.31	9.98488	10.6706	10.4288	10.2506	10.0841	9.94088
A_55_P1974452	0.0543711	0.156454	1.95493	up	NM_023684	chr2:181118195-181118254	Lime1	Mus musculus Lck interacting transmembrane adaptor 1 (Lime1), mRNA [NM_023684]	GO:0050853|GO:0005515|GO:0042345|GO:0050852|GO:0005886|GO:0006357|GO:0019901|GO:0051279|GO:0014066|GO:0005615|GO:0019815|GO:0016020|GO:0043405|GO:0016021|GO:0043122|GO:0002376	NM_023684	Mm.440138	72699	1332.41	1265.51	10.8089	9.84177	1199.72	1524.46	1273.04	1214	1291.82	1290.71	10.102	11.2553	11.0693	9.85541	9.78201	9.88787
A_55_P1961247	0.699281	0.784522	1.08523	up		chr1:081794311-081794370							11843.7	19031.8	13.9338	13.8158	12414.1	11077.9	12039	20500.6	16841.9	19753	13.4137	14.0965	14.2912	13.9203	13.616	13.9111
A_51_P476601	0.0794949	0.194371	1.77688	up	NM_016923	chr1:16696289-16699561	Ly96	Mus musculus lymphocyte antigen 96 (Ly96), transcript variant 1, mRNA [NM_016923]	GO:0046696|GO:0005515|GO:0002221|GO:0006954|GO:0045087|GO:0032496|GO:0031666|GO:0001875|GO:0032497|GO:0005576|GO:0031663|GO:0002376	NM_016923	Mm.116844	17087	261.77	266.835	8.32666	7.49731	468.934	194.495	121.882	323.805	243.477	233.223	8.74653	8.46178	7.77168	7.90713	7.28592	7.2989
A_52_P4046	0.431194	0.55918	1.03449	up	NM_054078	chr10:127565977-127566036	Baz2a	Mus musculus bromodomain adjacent to zinc finger domain, 2A (Baz2a), mRNA [NM_054078]	GO:0005515|GO:0070933|GO:0016575|GO:0006355|GO:0034770|GO:0003723|GO:0005730|GO:0070869|GO:0033553|GO:0005634|GO:0003677|GO:0046872|GO:0006351|GO:0006306|GO:0000183|GO:0070577|GO:0006338|GO:0008270|GO:0051567|GO:0005677|GO:0016568	NM_054078	Mm.252213	116848	958.836	1656.53	10.2865	10.2376	1391.31	758.445	726.756	1528.52	1683.75	1757.33	10.3052	10.2884	10.2659	10.1871	10.1786	10.347
A_55_P2063465	0.597566	0.70195	1.05701	up	NM_013691	chr3:89030667-89030726	Thbs3	Mus musculus thrombospondin 3 (Thbs3), mRNA [NM_013691]	GO:0048471|GO:0003417|GO:0060346|GO:0043931|GO:0005509|GO:0005576|GO:0007155|GO:0008201	NM_013691	Mm.2114	21827	187.238	349.12	7.9785	7.89852	299.098	119.898	142.718	371.913	354.144	321.303	8.13299	7.8004	8.00213	8.09815	7.82268	7.77474
A_55_P2070250	0.500491	0.619911	1.42324	up	NM_019478	chrX:7475993-7475934	Pqbp1	Mus musculus polyglutamine binding protein 1 (Pqbp1), transcript variant 1, mRNA [NM_019478]	GO:0048814|GO:0034063|GO:0006355|GO:0005737|GO:0071598|GO:0016607|GO:0010494|GO:0043021|GO:0043484|GO:0005634|GO:0006351	NM_019478	Mm.14616	54633	8.78379	12.8595	3.67228	3.1631	5	9.40677	11.9446	14.6133	14.2232	9.74188	2.34394	4.21574	4.45717	3.42632	3.20832	2.85467
A_52_P676956	0.00464786	0.0487697	2.83121	up	NM_054096	chr9:34994995-34994936	Tirap	Mus musculus toll-interleukin 1 receptor (TIR) domain-containing adaptor protein (Tirap), transcript variant 2, mRNA [NM_054096]	GO:0005515|GO:0050830|GO:0007249|GO:0046330|GO:0032757|GO:0042803|GO:0005622|GO:0032648|GO:0005080|GO:0032496|GO:0030099|GO:0070374|GO:0043123|GO:0044130|GO:0045410|GO:0032760|GO:0046982|GO:0005546|GO:0045089|GO:0045087|GO:0045088|GO:0090023|GO:0035665|GO:0002376|GO:0034145|GO:0035663|GO:0035662|GO:0005886|GO:0034141|GO:0030890|GO:0032738|GO:0032735|GO:0030139|GO:2000340|GO:0009617|GO:0005737|GO:…	NM_054096	Mm.23987	117149	1099.1	714.642	10.4752	8.97383	1357.36	1254.95	684.979	743.317	724.202	676.407	10.2732	10.9765	10.1761	9.12229	8.90317	8.89602
A_52_P33014	0.0749379	0.187968	1.3407	up	NM_146154	chr4:132383252-132383193	Ppp1r8	Mus musculus protein phosphatase 1, regulatory (inhibitor) subunit 8 (Ppp1r8), transcript variant 1, mRNA [NM_146154]	GO:0005515|GO:0006397|GO:0008380|GO:0006355|GO:0008283|GO:0003723|GO:0004864|GO:0005634|GO:0007275|GO:0003677|GO:0006351|GO:0008599|GO:0050790|GO:0016607|GO:0005681	NM_146154	Mm.105230	100336	523.169	757.905	9.47668	9.0537	648.99	521.804	398.714	655.179	852.631	765.906	9.21286	9.7801	9.43709	8.93133	9.14487	9.08489
A_52_P284778	0.590109	0.695603	1.10192	up	NM_175112	chr2:172838261-172838320	Rae1	Mus musculus RAE1 RNA export 1 homolog (S. pombe) (Rae1), mRNA [NM_175112]	GO:0071407|GO:0005737|GO:0005730|GO:0005634	NM_175112	Mm.4113	66679	617.65	1070.74	9.72404	9.58401	676.238	621.971	554.742	944.141	1217.95	1050.13	9.26996	10.0213	9.88081	9.47393	9.69695	9.58116
[truncated: 12,827 more rows]

## Sheet: down_T_vs_C
# Fold Change cut-off: 1.0 # P-value cut-off: 1.0 # Condition pairs: T_vs_C # Column A: ProbeName it represents probe name. # Column B: P-value, P-value calculated from unpaired t-test. # Column C: FDR, FDR is calculated from Benjamini Hochberg FDR. # Column D: Fold change, the absolute ratio (no log scale) of normalized intensities between two conditions. # Column E: Regulation, it depicts which…
T_vs_C 1.0 fold down regulated genes
[truncated: 14,403 more rows]

## Sheet: up_T-1_vs_C
# Fold Change cut-off: 1.0 # Condition pairs: T-1_vs_C # Column A: ProbeName it represents probe name. # Column B: Fold change, Absolute Fold change between two samples. # Column C: Regulation, it depicts which sample has greater or lower intensity values wrt other sample. # Column D ~ K: Annotations to each probe, including GenbankAccession, GenomicCoordinates, GeneSymbol, Description, Go, RefSe…
[truncated: 14,231 more rows]

[truncated: 5 more sheets: down_T-1_vs_C, up_T-2_vs_C, down_T-2_vs_C, up_T-3_vs_C, down_T-3_vs_C]
